# Supplementary material for: Natrix natrix after dark: citizen science sheds light on the common grass snake’s nightlife
Source: PeerJ. 2024 Apr 25;12:e17168. doi: 10.7717/peerj.17168 (PMC11056106; doi:10.7717/peerj.17168)
Supplement: Data S1 [file peerj-12-17168-s001.xlsx]

## Sheet: Sheet1
scientific_name	datetime	latitude	longitude	common_name	url	observed_on_string	observed_on	time_observed_at	time_zone	positional_accuracy	taxon_geoprivacy	coordinates_obscured	positioning_method	positioning_device	created_at	updated_at	quality_grade	license
Natrix natrix	2020-09-06 14:42:16 +0300	37.9013	23.876	grass snake	https://www.inaturalist.org/observations/149348368	2020-09-06 14:42:16	2020-09-06	2020-09-06 11:42:16 UTC	Athens	1876	open	false	gps	gps	2023-02-21 20:23:36 UTC	2023-02-22 17:20:35 UTC	research	CC-BY-NC
Natrix natrix	2009-05-31 17:45:00 +0400	55.8813	37.7909	grass snake	https://www.inaturalist.org/observations/149315086	2009/05/31 17:45	2009-05-31	2009-05-31 13:45:00 UTC	St. Petersburg	3018	open	false			2023-02-21 12:03:53 UTC	2023-02-22 06:11:19 UTC	research	CC-BY-NC
Natrix natrix	2020-08-25 10:53:51 +0300	43.6541	25.1244	grass snake	https://www.inaturalist.org/observations/149314067	2020-08-25 10:53:51	2020-08-25	2020-08-25 07:53:51 UTC	Sofia	355	open	false	gps	gps	2023-02-21 11:38:11 UTC	2023-02-22 06:11:27 UTC	research	CC-BY-NC
Natrix natrix	2020-07-08 07:40:00 +0300	46.4414	34.9244	grass snake	https://www.inaturalist.org/observations/149139147	2020/07/08 07:40	2020-07-08	2020-07-08 04:40:00 UTC	Kyiv	31	open	false			2023-02-19 15:40:33 UTC	2023-02-19 16:58:59 UTC	research	CC-BY-NC
Natrix natrix	2022-04-28 13:44:05 +0200	40.99	19.4864	grass snake	https://www.inaturalist.org/observations/149131714	2022-04-28 13:44:05	2022-04-28	2022-04-28 11:44:05 UTC	Europe/Tirane	#N/A	open	false	gps	gps	2023-02-19 14:04:26 UTC	2023-02-19 16:46:38 UTC	research
Natrix natrix	2022-10-15 15:44:00 +0200	52.3955	19.4291	grass snake	https://www.inaturalist.org/observations/149124044	2022/10/15 15:44	2022-10-15	2022-10-15 13:44:00 UTC	Warsaw	15	open	false			2023-02-19 11:44:37 UTC	2023-02-19 17:23:35 UTC	research	CC-BY-NC
Natrix natrix	2003-04-30 00:00:00 +0300	36.7908	28.6217	grass snake	https://www.inaturalist.org/observations/149116339	2003/04/30 00:00	2003-04-30	2003-04-29 21:00:00 UTC	Istanbul	#N/A	open	false			2023-02-19 08:43:21 UTC	2023-02-20 21:39:47 UTC	research	CC-BY-NC
Natrix natrix	2022-08-25 19:13:00 +0200	51.1453	13.704	grass snake	https://www.inaturalist.org/observations/149068178	2022/08/25 19:13	2022-08-25	2022-08-25 17:13:00 UTC	Berlin	#N/A	open	false			2023-02-18 20:26:58 UTC	2023-02-19 07:23:32 UTC	research	CC-BY-NC-ND
Natrix natrix	2021-05-21 17:10:52 +0200	49.9943	8.79252	grass snake	https://www.inaturalist.org/observations/149063707	2021-05-21 17:10:52	2021-05-21	2021-05-21 15:10:52 UTC	Berlin	323	open	false	gps	gps	2023-02-18 19:37:23 UTC	2023-02-19 13:55:39 UTC	research	CC-BY-NC
Natrix natrix	2017-08-09 11:10:00 +0300	59.8113	22.3274	grass snake	https://www.inaturalist.org/observations/149055641	2017/08/09 11:10 AM	2017-08-09	2017-08-09 08:10:00 UTC	Helsinki	2111	open	false			2023-02-18 17:53:55 UTC	2023-02-18 17:54:31 UTC	research	CC-BY-NC
Natrix natrix	2020-09-24 13:17:00 +0300	46.2049	33.5326	grass snake	https://www.inaturalist.org/observations/149025073	2020/09/24 13:17	2020-09-24	2020-09-24 10:17:00 UTC	Kyiv	8	open	false			2023-02-18 08:40:42 UTC	2023-02-19 07:24:06 UTC	research	CC-BY-NC
Natrix natrix	2010-08-22 11:27:00 +0400	53.2516	44.8458	grass snake	https://www.inaturalist.org/observations/149018041	2010/08/22 11:27	2010-08-22	2010-08-22 07:27:00 UTC	St. Petersburg	4	open	false			2023-02-18 05:22:29 UTC	2023-02-20 05:01:27 UTC	research	CC-BY-NC
Natrix natrix	2015-05-07 11:32:00 +0200	42.2898	19.3078	grass snake	https://www.inaturalist.org/observations/149003499	2015/05/07 11:32 AM	2015-05-07	2015-05-07 09:32:00 UTC	Europe/Podgorica	24874	open	false			2023-02-18 00:32:00 UTC	2023-02-18 05:55:55 UTC	research	CC-BY-NC
Natrix natrix	2018-05-17 11:22:00 +0300	59.3985	24.2866	grass snake	https://www.inaturalist.org/observations/148958915	2018/05/17 11:22 AM	2018-05-17	2018-05-17 08:22:00 UTC	Tallinn	491	open	false			2023-02-17 10:35:42 UTC	2023-02-17 10:45:29 UTC	research	CC-BY-NC
Natrix natrix	2022-09-30 13:09:00 +0300	41.1254	24.1531	grass snake	https://www.inaturalist.org/observations/148932610	2022/09/30 1:09 PM	2022-09-30	2022-09-30 10:09:00 UTC	Athens	2	open	false			2023-02-16 23:41:19 UTC	2023-02-22 06:28:24 UTC	research	CC-BY-NC
Natrix natrix	2021-06-03 00:00:00 +0100	48.0491	11.3023	grass snake	https://www.inaturalist.org/observations/148893931	2021/06/03	2021-06-03		Berlin	#N/A	open	true			2023-02-16 12:47:54 UTC	2023-02-17 07:09:52 UTC	research
Natrix natrix	2021-05-28 00:00:00 +0100	47.7457	11.2611	grass snake	https://www.inaturalist.org/observations/148893930	2021/05/28	2021-05-28		Berlin	#N/A	open	true			2023-02-16 12:47:54 UTC	2023-02-17 07:10:02 UTC	research
Natrix natrix	2018-05-11 13:09:00 +0300	46.2001	34.4062	grass snake	https://www.inaturalist.org/observations/148844836	2018/05/11 13:09	2018-05-11	2018-05-11 10:09:00 UTC	Kyiv	122	open	false			2023-02-15 19:38:41 UTC	2023-02-16 07:30:27 UTC	research	CC-BY-NC
Natrix natrix	2018-05-11 11:03:00 +0300	46.2182	34.4229	grass snake	https://www.inaturalist.org/observations/148844813	2018/05/11 11:03	2018-05-11	2018-05-11 08:03:00 UTC	Kyiv	31	open	false			2023-02-15 19:38:33 UTC	2023-02-16 07:30:33 UTC	research	CC-BY-NC
Natrix natrix	2015-05-09 13:36:00 +0200	47.1387	15.2771	grass snake	https://www.inaturalist.org/observations/148818990	2015/05/09 13:36	2015-05-09	2015-05-09 11:36:00 UTC	Vienna	526	open	false			2023-02-15 11:15:25 UTC	2023-02-16 07:30:43 UTC	research	CC-BY-NC
Natrix natrix	2018-05-15 13:43:00 +0300	59.4252	24.6112	grass snake	https://www.inaturalist.org/observations/148798044	2018/05/15 1:43 PM	2018-05-15	2018-05-15 10:43:00 UTC	Tallinn	160	open	false			2023-02-15 01:30:09 UTC	2023-02-15 14:27:10 UTC	research	CC-BY-NC
Natrix natrix	2012-05-14 01:20:00 +0400	57.7431	40.4927	grass snake	https://www.inaturalist.org/observations/148773127	2012/05/14 01:20	2012-05-14	2012-05-13 21:20:00 UTC	St. Petersburg	31	open	false			2023-02-14 18:16:15 UTC	2023-02-15 07:22:24 UTC	research	CC-BY-NC
Natrix natrix	2022-10-07 16:17:00 +0200	43.9463	15.5299	grass snake	https://www.inaturalist.org/observations/148769362	2022/10/07 16:17	2022-10-07	2022-10-07 14:17:00 UTC	Zagreb	#N/A	open	false			2023-02-14 17:09:28 UTC	2023-02-14 17:19:20 UTC	research	CC-BY-NC
Natrix natrix	2008-06-21 13:10:00 +0200	58.4601	12.3781	grass snake	https://www.inaturalist.org/observations/148754327	2008/06/21 1:10 PM	2008-06-21	2008-06-21 11:10:00 UTC	Stockholm	4	open	false			2023-02-14 11:55:48 UTC	2023-02-15 07:22:30 UTC	research	CC-BY-NC
Natrix natrix	2022-06-26 12:03:22 +0300	37.9295	22.2574	grass snake	https://www.inaturalist.org/observations/148753331	2022-06-26 12:03:22+03:00	2022-06-26	2022-06-26 09:03:22 UTC	Athens	20	open	false			2023-02-14 11:22:22 UTC	2023-02-15 14:49:34 UTC	research	CC-BY-NC
Natrix natrix	2008-07-10 17:38:00 +0200	57.8103	11.8413	grass snake	https://www.inaturalist.org/observations/148752795	2008/07/10 5:38 PM	2008-07-10	2008-07-10 15:38:00 UTC	Stockholm	26	open	false			2023-02-14 11:08:06 UTC	2023-02-15 07:23:23 UTC	research	CC-BY-NC
Natrix natrix	2020-08-19 12:09:00 +0200	44.1189	20.0032	grass snake	https://www.inaturalist.org/observations/148699536	2020/08/19 12:09 PM	2020-08-19	2020-08-19 10:09:00 UTC	Belgrade	50	open	false			2023-02-13 16:58:41 UTC	2023-02-14 18:42:09 UTC	research
Natrix natrix	2022-05-09 00:00:00 +0100	51.2938	23.4135	grass snake	https://www.inaturalist.org/observations/148640347	2022-05-09	2022-05-09		Warsaw	169	open	false	gps	gps	2023-02-12 21:50:44 UTC	2023-02-13 15:10:50 UTC	research	CC-BY-NC
Natrix natrix	2015-05-29 11:39:00 +0400	42.1403	41.6921	grass snake	https://www.inaturalist.org/observations/148549202	2015/05/29 11:39 AM	2015-05-29	2015-05-29 07:39:00 UTC	Tbilisi	4	open	false			2023-02-11 21:05:18 UTC	2023-02-12 22:11:44 UTC	research
Natrix natrix	2023-02-10 16:08:03 +0300	45.1902	33.6665	grass snake	https://www.inaturalist.org/observations/148510674	2023-02-10 16:08:03	2023-02-10	2023-02-10 13:08:03 UTC	Europe/Simferopol	46	open	false	gps	gps	2023-02-11 11:45:35 UTC	2023-02-12 07:15:17 UTC	research	CC-BY-NC
Natrix natrix	2019-09-01 00:00:00 +0300	55.8947	37.7722	grass snake	https://www.inaturalist.org/observations/148504698	2019-09-01	2019-09-01		St. Petersburg	89	open	false	gps	gps	2023-02-11 08:58:20 UTC	2023-02-13 16:27:52 UTC	research	CC-BY-NC
Natrix natrix	2021-06-02 14:55:16 +0200	52.4685	16.9325	grass snake	https://www.inaturalist.org/observations/148411073	2021-06-02 14:55:16	2021-06-02	2021-06-02 12:55:16 UTC	Warsaw	#N/A	open	false	gps	gps	2023-02-09 22:42:14 UTC	2023-02-10 11:27:41 UTC	research
Natrix natrix	2023-02-07 13:03:23 +0100	44.8186	12.2449	grass snake	https://www.inaturalist.org/observations/148330171	2023-02-07 13:03:23	2023-02-07	2023-02-07 12:03:23 UTC	Rome	#N/A	open	false			2023-02-08 18:26:19 UTC	2023-02-09 13:22:43 UTC	research	CC-BY-NC-ND
Natrix natrix	1998-07-09 13:40:00 +0200	48.6912	16.9161	grass snake	https://www.inaturalist.org/observations/148313721	1998/07/09 13:40	1998-07-09	1998-07-09 11:40:00 UTC	Vienna	61	open	false			2023-02-08 12:42:57 UTC	2023-02-09 07:48:56 UTC	research	CC-BY-NC
Natrix natrix	2019-05-11 11:18:36 +0200	47.2561	16.0951	grass snake	https://www.inaturalist.org/observations/148312981	2019-05-11 11:18:36	2019-05-11	2019-05-11 09:18:36 UTC	Vienna	3625	open	false	gps	gps	2023-02-08 12:27:20 UTC	2023-02-09 07:49:15 UTC	research	CC-BY-NC
Natrix natrix	2019-09-01 10:39:06 +0200	49.8223	19.0584	grass snake	https://www.inaturalist.org/observations/148235274	2019-09-01 10:39:06	2019-09-01	2019-09-01 08:39:06 UTC	Warsaw	8897	open	false	gps	gps	2023-02-07 07:16:58 UTC	2023-02-08 08:07:45 UTC	research
Natrix natrix	2020-08-01 12:52:06 +0200	56.3267	9.62619	grass snake	https://www.inaturalist.org/observations/148185522	2020-08-01 12:52:06	2020-08-01	2020-08-01 10:52:06 UTC	Copenhagen	1070	open	false	gps	gps	2023-02-06 15:42:44 UTC	2023-02-08 08:07:54 UTC	research
Natrix natrix	2022-08-19 11:24:00 +0300	43.8398	28.5893	grass snake	https://www.inaturalist.org/observations/148112911	2022/08/19 11:24	2022-08-19	2022-08-19 08:24:00 UTC	Bucharest	2	open	false			2023-02-05 17:26:15 UTC	2023-02-08 08:08:04 UTC	research	CC-BY-NC
Natrix natrix	2021-04-20 11:40:00 +0300	55.4462	37.732	grass snake	https://www.inaturalist.org/observations/148097812	2021/04/20 11:40	2021-04-20	2021-04-20 08:40:00 UTC	St. Petersburg	10	open	false			2023-02-05 13:52:45 UTC	2023-02-08 08:08:12 UTC	research	CC-BY-NC
Natrix natrix	2011-08-02 08:28:00 +0300	37.3997	33.1486	grass snake	https://www.inaturalist.org/observations/148095473	2011/08/02 8:28 AM	2011-08-02	2011-08-02 05:28:00 UTC	Istanbul	1723	open	false			2023-02-05 13:07:52 UTC	2023-02-08 08:08:20 UTC	research	CC-BY-NC
Natrix natrix	2022-06-11 00:00:00 +0300	52.2267	35.6675	grass snake	https://www.inaturalist.org/observations/147895492	2022-06-11	2022-06-11		St. Petersburg	244	open	false			2023-02-02 16:39:12 UTC	2023-02-08 08:08:28 UTC	research	CC-BY-NC
Natrix natrix	2013-09-08 15:53:00 +0200	46.6903	15.6109	grass snake	https://www.inaturalist.org/observations/147895396	2013/09/08 15:53	2013-09-08	2013-09-08 13:53:00 UTC	Vienna	320	open	false			2023-02-02 16:37:37 UTC	2023-02-08 08:08:58 UTC	research	CC-BY-NC
Natrix natrix	2013-04-28 00:00:00 +0200	45.1914	21.9225	grass snake	https://www.inaturalist.org/observations/147881884	2013/04/28	2013-04-28		Bucharest	31	open	false			2023-02-02 10:54:34 UTC	2023-02-03 06:04:39 UTC	research	CC-BY-NC
Natrix natrix	2022-08-14 12:14:00 +0300	52.2261	35.6615	grass snake	https://www.inaturalist.org/observations/147879015	2022/08/14 12:14	2022-08-14	2022-08-14 09:14:00 UTC	St. Petersburg	162	open	false			2023-02-02 09:16:42 UTC	2023-02-08 08:09:18 UTC	research	CC-BY-NC
Natrix natrix	2019-11-10 15:26:00 +0200	48.4853	34.8506	grass snake	https://www.inaturalist.org/observations/147754081	2019-11-10 15:26:00+02:00	2019-11-10	2019-11-10 13:26:00 UTC	Kyiv	130	open	false			2023-01-31 09:44:59 UTC	2023-02-04 10:22:16 UTC	research	CC-BY-NC
Natrix natrix	2019-08-05 18:40:00 +0300	55.1036	37.7627	grass snake	https://www.inaturalist.org/observations/147691505	2019/08/05 18:40	2019-08-05	2019-08-05 15:40:00 UTC	St. Petersburg	61	open	false			2023-01-30 11:30:13 UTC	2023-02-02 08:43:22 UTC	research	CC-BY-NC
Natrix natrix	2018-05-09 09:48:00 +0300	39.8294	21.0522	grass snake	https://www.inaturalist.org/observations/147644102	2018/05/09 09:48	2018-05-09	2018-05-09 06:48:00 UTC	Athens	#N/A	open	false			2023-01-29 20:56:40 UTC	2023-02-03 12:47:32 UTC	research	CC-BY-NC
Natrix natrix	2013-05-10 11:00:00 +0400	56.4709	44.8109	grass snake	https://www.inaturalist.org/observations/147630656	2013/05/10 11:00	2013-05-10	2013-05-10 07:00:00 UTC	St. Petersburg	61	open	false			2023-01-29 18:05:50 UTC	2023-02-02 08:43:39 UTC	research
Natrix natrix	2021-06-06 14:46:00 +0200	51.1495	13.6974	grass snake	https://www.inaturalist.org/observations/147552179	2021/06/06 14:46	2021-06-06	2021-06-06 12:46:00 UTC	Berlin	189	open	false			2023-01-28 19:59:43 UTC	2023-02-02 08:43:58 UTC	research	CC-BY-NC-ND
Natrix natrix	2018-09-10 19:32:00 +0200	43.1561	17.6082	grass snake	https://www.inaturalist.org/observations/147541534	2018/09/10 7:32 PM	2018-09-10	2018-09-10 17:32:00 UTC	Sarajevo	15	open	false			2023-01-28 17:39:49 UTC	2023-01-29 09:13:23 UTC	casual	CC-BY-NC
Natrix natrix	2021-05-10 00:00:00 +0200	54.6179	21.0904	grass snake	https://www.inaturalist.org/observations/147519008	2021-05-10	2021-05-10		Kaliningrad	164	open	false	gps	gps	2023-01-28 10:55:54 UTC	2023-01-30 07:04:26 UTC	research	CC-BY-NC
Natrix natrix	2017-10-14 17:41:00 +0200	55.5795	11.4599	grass snake	https://www.inaturalist.org/observations/147453276	2017/10/14 5:41 PM	2017-10-14	2017-10-14 15:41:00 UTC	Copenhagen	122	open	false			2023-01-27 12:14:11 UTC	2023-02-09 06:17:51 UTC	research
Natrix natrix	2022-04-25 15:25:00 +0300	55.8421	37.6164	grass snake	https://www.inaturalist.org/observations/147413995	2022/04/25 15:25	2022-04-25	2022-04-25 12:25:00 UTC	St. Petersburg	15	open	false			2023-01-26 20:31:07 UTC	2023-01-28 13:13:57 UTC	research	CC-BY-NC
Natrix natrix	2016-07-29 00:00:00 +0200	48.5632	34.9319	grass snake	https://www.inaturalist.org/observations/147382707	2016/07/29	2016-07-29		Kyiv	10	open	false			2023-01-26 09:26:14 UTC	2023-01-28 13:14:08 UTC	research	CC-BY
Natrix natrix	2022-06-04 00:00:00 +0100	51.2102	16.7132	grass snake	https://www.inaturalist.org/observations/147346411	2022-06-04	2022-06-04		Warsaw	628	open	false	gps	gps	2023-01-25 20:12:17 UTC	2023-01-28 13:14:19 UTC	research	CC-BY-NC
Natrix natrix	2021-10-24 19:49:00 +0200	52.2658	13.9611	grass snake	https://www.inaturalist.org/observations/147336041	2021/10/24 19:49	2021-10-24	2021-10-24 17:49:00 UTC	Berlin	15	open	false			2023-01-25 17:10:14 UTC	2023-02-07 17:42:01 UTC	research	CC-BY-NC
Natrix natrix	2021-07-11 14:26:00 +0200	52.8824	13.9262	grass snake	https://www.inaturalist.org/observations/147335648	2021/07/11 14:26	2021-07-11	2021-07-11 12:26:00 UTC	Berlin	31	open	false			2023-01-25 17:03:46 UTC	2023-02-07 17:41:30 UTC	research	CC-BY-NC
Natrix natrix	2017-06-12 14:37:00 +0300	57.5808	43.6463	grass snake	https://www.inaturalist.org/observations/147273113	2017/06/12 14:37	2017-06-12	2017-06-12 11:37:00 UTC	St. Petersburg	61	open	false			2023-01-24 17:01:58 UTC	2023-01-28 13:14:55 UTC	research	CC-BY-NC
Natrix natrix	2020-09-12 18:33:00 +0200	48.2379	11.3081	grass snake	https://www.inaturalist.org/observations/147252488	2020/09/12 18:33	2020-09-12	2020-09-12 16:33:00 UTC	Berlin	15	open	false			2023-01-24 08:25:01 UTC	2023-01-28 13:15:04 UTC	research	CC-BY-NC
Natrix natrix	2021-06-26 07:18:00 +0200	48.1726	11.4005	grass snake	https://www.inaturalist.org/observations/147252135	2021/06/26 07:18	2021-06-26	2021-06-26 05:18:00 UTC	Berlin	8	open	false			2023-01-24 08:17:40 UTC	2023-01-28 13:15:13 UTC	research	CC-BY-NC
Natrix natrix	2021-06-27 16:09:00 +0200	48.2362	11.3039	grass snake	https://www.inaturalist.org/observations/147252133	2021/06/27 16:09	2021-06-27	2021-06-27 14:09:00 UTC	Berlin	15	open	false			2023-01-24 08:17:40 UTC	2023-01-28 13:15:21 UTC	research	CC-BY-NC
Natrix natrix	2022-05-09 00:00:00 +0100	51.9642	22.218	grass snake	https://www.inaturalist.org/observations/147196800	2022-05-09	2022-05-09		Warsaw	176	open	false	gps	gps	2023-01-23 15:13:40 UTC	2023-01-28 13:15:39 UTC	research	CC-BY-NC
Natrix natrix	2022-05-01 00:00:00 +0100	51.9545	22.226	grass snake	https://www.inaturalist.org/observations/147196436	2022-05-01	2022-05-01		Warsaw	207	open	false	gps	gps	2023-01-23 15:07:11 UTC	2023-01-28 13:15:48 UTC	research	CC-BY-NC
Natrix natrix	2022-05-23 00:00:00 +0100	45.0794	14.5547	grass snake	https://www.inaturalist.org/observations/147189003	2022-05-23	2022-05-23		Zagreb	167	open	false			2023-01-23 12:17:56 UTC	2023-02-11 20:21:07 UTC	research	CC-BY-NC
Natrix natrix moreotica	2023-01-21 15:28:00 +0300	36.4168	29.1879		https://www.inaturalist.org/observations/147105247	2023-01-21 15:28:00	2023-01-21	2023-01-21 12:28:00 UTC	Istanbul	768	open	false	gps	gps	2023-01-22 12:32:59 UTC	2023-01-29 11:48:41 UTC	research	CC-BY-NC
Natrix natrix	2022-08-20 12:41:29 +0300	42.0241	28.009	grass snake	https://www.inaturalist.org/observations/147044531	2022-08-20 12:41:29	2022-08-20	2022-08-20 09:41:29 UTC	Sofia	#N/A	open	false	gps	gps	2023-01-21 19:04:35 UTC	2023-01-28 13:16:24 UTC	research	CC-BY-NC
Natrix natrix	2021-06-03 00:00:00 +0300	55.6357	37.4774	grass snake	https://www.inaturalist.org/observations/146974913	2021-06-03	2021-06-03		St. Petersburg	203	open	false	gps	gps	2023-01-20 19:34:13 UTC	2023-01-28 13:16:32 UTC	research	CC0
Natrix natrix	2016-06-30 11:38:00 +0300	59.2277	24.1408	grass snake	https://www.inaturalist.org/observations/146873616	2016/06/30 11:38 AM	2016-06-30	2016-06-30 08:38:00 UTC	Tallinn	51	open	false			2023-01-19 05:44:06 UTC	2023-01-28 13:16:57 UTC	research	CC-BY-NC
Natrix natrix	2022-04-27 13:08:00 +0300	55.8426	37.6132	grass snake	https://www.inaturalist.org/observations/146841673	2022/04/27 13:08	2022-04-27	2022-04-27 10:08:00 UTC	St. Petersburg	2	open	false			2023-01-18 19:20:03 UTC	2023-01-28 13:17:09 UTC	research	CC-BY-NC
Natrix natrix	2019-05-22 15:18:30 +0300	55.6367	37.4774	grass snake	https://www.inaturalist.org/observations/146785082	2019-05-22 15:18:30	2019-05-22	2019-05-22 12:18:30 UTC	St. Petersburg	197	open	false	gps	gps	2023-01-17 21:55:01 UTC	2023-01-28 13:17:19 UTC	research	CC-BY
Natrix natrix	2019-06-14 11:02:08 +0300	55.6399	37.4709	grass snake	https://www.inaturalist.org/observations/146784157	2019-06-14 11:02:08	2019-06-14	2019-06-14 08:02:08 UTC	St. Petersburg	#N/A	open	false	gps	gps	2023-01-17 21:41:40 UTC	2023-01-28 13:17:27 UTC	research	CC-BY
Natrix natrix	2020-07-06 12:35:00 +0300	54.6576	39.6439	grass snake	https://www.inaturalist.org/observations/146770162	2020/07/06 12:35	2020-07-06	2020-07-06 09:35:00 UTC	St. Petersburg	5	open	false			2023-01-17 17:30:25 UTC	2023-01-28 13:17:34 UTC	research	CC-BY-NC
Natrix natrix	2022-08-05 12:33:00 +0200	48.1821	16.3028	grass snake	https://www.inaturalist.org/observations/146758533	2022/08/05 12:33	2022-08-05	2022-08-05 10:33:00 UTC	Vienna	817	open	false			2023-01-17 13:25:31 UTC	2023-01-28 13:17:43 UTC	research	CC-BY-NC
Natrix natrix	2018-05-12 09:23:00 +0200	49.2693	11.609	grass snake	https://www.inaturalist.org/observations/146712165	2018/05/12 09:23	2018-05-12	2018-05-12 07:23:00 UTC	Berlin	31	open	false			2023-01-16 20:44:30 UTC	2023-01-31 16:16:27 UTC	research	CC-BY-NC-ND
Natrix natrix	2021-07-04 11:29:00 +0200	47.5514	11.1511	grass snake	https://www.inaturalist.org/observations/146702630	2021/07/04 11:29	2021-07-04	2021-07-04 09:29:00 UTC	Berlin	500	open	false			2023-01-16 18:12:46 UTC	2023-01-28 13:18:03 UTC	research
Natrix natrix	2022-07-20 00:00:00 +0100	52.6992	16.2105	grass snake	https://www.inaturalist.org/observations/146619624	2022-07-20	2022-07-20		Warsaw	1314	open	false	gps	gps	2023-01-15 16:51:23 UTC	2023-01-16 06:13:38 UTC	research	CC-BY-NC
Natrix natrix	2022-05-12 13:38:00 +0300	55.5819	37.5572	grass snake	https://www.inaturalist.org/observations/146558073	2022/05/12 13:38	2022-05-12	2022-05-12 10:38:00 UTC	St. Petersburg	15	open	false			2023-01-14 21:07:28 UTC	2023-01-16 06:13:45 UTC	research	CC-BY-NC
Natrix natrix	2022-05-26 17:41:00 +0200	45.4932	18.7074	grass snake	https://www.inaturalist.org/observations/146438763	2022/05/26 5:41 PM	2022-05-26	2022-05-26 15:41:00 UTC	Zagreb	15	open	false			2023-01-13 01:49:14 UTC	2023-02-11 20:22:54 UTC	research	CC-BY-NC
Natrix natrix	2022-08-27 15:50:00 +0300	55.0299	38.7538	grass snake	https://www.inaturalist.org/observations/146430862	2022/08/27 15:50	2022-08-27	2022-08-27 12:50:00 UTC	St. Petersburg	31	open	false			2023-01-12 23:17:43 UTC	2023-01-13 06:05:39 UTC	research	CC-BY-NC
Natrix natrix	2022-08-30 13:18:00 +0300	44.896	29.5882	grass snake	https://www.inaturalist.org/observations/146407346	2022/08/30 1:18 PM	2022-08-30	2022-08-30 10:18:00 UTC	Bucharest	81	open	false			2023-01-12 16:33:47 UTC	2023-01-13 06:05:58 UTC	research	CC-BY-NC
Natrix natrix	2022-06-17 00:00:00 +0000	50.9487	-1.55606	grass snake	https://www.inaturalist.org/observations/146332067	2022-06-17	2022-06-17		London	15	open	false	gps	gps	2023-01-11 12:50:43 UTC	2023-01-17 13:55:54 UTC	casual	CC-BY-NC
Natrix natrix	2013-04-25 12:36:00 +0300	49.7786	24.8598	grass snake	https://www.inaturalist.org/observations/146269551	2013/04/25 12:36	2013-04-25	2013-04-25 09:36:00 UTC	Kyiv	2338	open	false			2023-01-10 13:36:32 UTC	2023-01-11 08:09:55 UTC	research	CC-BY-NC
Natrix natrix	2022-10-01 12:20:32 +0300	55.4755	37.2821	grass snake	https://www.inaturalist.org/observations/146266199	2022-10-01 12:20:32	2022-10-01	2022-10-01 09:20:32 UTC	St. Petersburg	376	open	false	gps	gps	2023-01-10 12:07:06 UTC	2023-02-10 08:52:23 UTC	research
Natrix natrix	2022-05-03 16:33:00 +0200	47.9796	14.7301	grass snake	https://www.inaturalist.org/observations/146261590	2022-05-03 16:33:00+02:00	2022-05-03	2022-05-03 14:33:00 UTC	Vienna	42	open	true			2023-01-10 09:23:06 UTC	2023-01-11 06:44:22 UTC	research	CC-BY-NC
Natrix natrix	2020-04-24 09:52:00 +0200	46.7595	15.6439	grass snake	https://www.inaturalist.org/observations/146228450	2020/04/24 9:52 AM	2020-04-24	2020-04-24 07:52:00 UTC	Vienna	#N/A	open	false			2023-01-09 21:24:09 UTC	2023-01-10 07:08:46 UTC	research
Natrix natrix	2018-05-08 15:48:00 +0200	47.103	15.2798	grass snake	https://www.inaturalist.org/observations/146224438	2018/05/08 3:48 PM	2018-05-08	2018-05-08 13:48:00 UTC	Vienna	8	open	false			2023-01-09 20:14:15 UTC	2023-01-10 07:08:53 UTC	research
Natrix natrix	2017-06-19 12:24:00 +0200	46.8819	15.917	grass snake	https://www.inaturalist.org/observations/146145230	2017/06/19 12:24 PM	2017-06-19	2017-06-19 10:24:00 UTC	Vienna	31	open	false			2023-01-08 19:51:17 UTC	2023-01-09 17:22:47 UTC	research
Natrix natrix	2013-09-22 12:27:00 +0300	50.1133	25.2534	grass snake	https://www.inaturalist.org/observations/146136989	2013/09/22 12:27	2013-09-22	2013-09-22 09:27:00 UTC	Kyiv	331	open	false			2023-01-08 18:10:00 UTC	2023-01-14 10:42:08 UTC	research	CC-BY-NC
Natrix natrix	2018-05-01 18:32:00 +0300	56.7068	37.8295	grass snake	https://www.inaturalist.org/observations/146114096	2018/05/01 18:32	2018-05-01	2018-05-01 15:32:00 UTC	St. Petersburg	5	open	false			2023-01-08 12:06:20 UTC	2023-01-09 06:36:43 UTC	research	CC-BY-NC
Natrix natrix	2022-10-07 13:38:46 +0200	47.5933	19.1215	grass snake	https://www.inaturalist.org/observations/146076461	2022-10-07 13:38:46+02:00	2022-10-07	2022-10-07 11:38:46 UTC	Budapest	56	open	false			2023-01-07 23:35:50 UTC	2023-01-11 10:58:50 UTC	research	CC-BY-NC
Natrix natrix	2022-06-06 19:08:07 +0200	46.9465	20.3096	grass snake	https://www.inaturalist.org/observations/146076001	2022-06-06 19:08:07+02:00	2022-06-06	2022-06-06 17:08:07 UTC	Budapest	20	open	false			2023-01-07 23:27:59 UTC	2023-01-09 06:36:48 UTC	research	CC-BY-NC
Natrix natrix	2020-09-12 18:24:40 +0200	47.1291	20.546	grass snake	https://www.inaturalist.org/observations/146074594	2020-09-12 18:24:40+02:00	2020-09-12	2020-09-12 16:24:40 UTC	Budapest	27	open	false			2023-01-07 23:07:23 UTC	2023-01-14 10:46:27 UTC	research	CC-BY-NC
Natrix natrix	2022-10-16 14:29:00 +0200	48.1116	15.3427	grass snake	https://www.inaturalist.org/observations/146035225	2022/10/16 14:29	2022-10-16	2022-10-16 12:29:00 UTC	Vienna	354	open	false			2023-01-07 13:16:27 UTC	2023-01-09 17:40:18 UTC	research
Natrix natrix	2017-03-08 10:22:00 +0200	35.0086	33.0374	grass snake	https://www.inaturalist.org/observations/146025502	2017/03/08 10:22	2017-03-08	2017-03-08 08:22:00 UTC	Asia/Nicosia	31	open	false			2023-01-07 09:23:46 UTC	2023-01-13 06:13:11 UTC	research	CC-BY-NC
Natrix natrix	2016-06-17 15:33:00 +0300	60.1404	25.0071	grass snake	https://www.inaturalist.org/observations/146009882	2016/06/17 3:33 PM	2016-06-17	2016-06-17 12:33:00 UTC	Helsinki	122	open	false			2023-01-07 03:11:37 UTC	2023-01-09 06:37:30 UTC	research	CC-BY-NC
Natrix natrix	2020-12-02 00:39:57 +0100	46.9768	20.1839	grass snake	https://www.inaturalist.org/observations/146001422	2020-12-02 00:39:57+01:00	2020-12-02	2020-12-01 23:39:57 UTC	Budapest	179	open	false			2023-01-07 00:57:01 UTC	2023-01-14 10:54:06 UTC	research	CC-BY-NC
Natrix natrix	2020-05-26 18:15:00 +0200	47.1129	19.9335	grass snake	https://www.inaturalist.org/observations/146000673	2020/05/26 18:15	2020-05-26	2020-05-26 16:15:00 UTC	Budapest	15	open	false			2023-01-07 00:38:16 UTC	2023-01-14 10:54:44 UTC	research	CC-BY-NC
Natrix natrix	2020-08-04 17:10:00 +0300	54.2942	37.6766	grass snake	https://www.inaturalist.org/observations/145972539	2020/08/04 17:10	2020-08-04	2020-08-04 14:10:00 UTC	St. Petersburg	139	open	false			2023-01-06 17:19:23 UTC	2023-01-14 10:56:13 UTC	research	CC-BY-NC
Natrix natrix	2022-09-27 13:23:00 +0300	55.1181	37.757	grass snake	https://www.inaturalist.org/observations/145958330	2022/09/27 13:23	2022-09-27	2022-09-27 10:23:00 UTC	St. Petersburg	15	open	false			2023-01-06 12:47:15 UTC	2023-01-25 17:41:36 UTC	research	CC-BY-NC
Natrix natrix	2022-05-11 16:44:00 +0300	55.1049	37.7862	grass snake	https://www.inaturalist.org/observations/145889529	2022/05/11 16:44	2022-05-11	2022-05-11 13:44:00 UTC	St. Petersburg	15	open	false			2023-01-05 12:16:34 UTC	2023-01-08 03:41:31 UTC	research	CC-BY-NC
Natrix natrix	2019-09-18 16:27:16 +0300	45.22	28.7422	grass snake	https://www.inaturalist.org/observations/145849313	2019-09-18 16:27:16	2019-09-18	2019-09-18 13:27:16 UTC	Bucharest	#N/A	open	false	gps	gps	2023-01-04 20:28:59 UTC	2023-01-08 03:41:23 UTC	research
Natrix natrix	2022-07-17 16:40:00 +0200	51.3482	12.3672	grass snake	https://www.inaturalist.org/observations/145847813	2022/07/17 4:40 PM	2022-07-17	2022-07-17 14:40:00 UTC	Berlin	4	open	false			2023-01-04 20:05:19 UTC	2023-01-14 11:12:54 UTC	research	CC-BY-NC
Natrix natrix	2023-01-04 13:48:00 +0200	48.499	34.8292	grass snake	https://www.inaturalist.org/observations/145842713	2023/01/04 13:48	2023-01-04	2023-01-04 11:48:00 UTC	Kyiv	2	open	false			2023-01-04 18:41:37 UTC	2023-01-08 03:43:38 UTC	research
Natrix natrix	2022-07-21 00:00:00 +0100	50.3028	22.4522	grass snake	https://www.inaturalist.org/observations/145835441	2022-07-21	2022-07-21		Warsaw	677	open	false	gps	gps	2023-01-04 16:32:38 UTC	2023-01-08 03:43:28 UTC	research	CC-BY-NC
Natrix natrix	2022-04-22 00:00:00 +0100	50.1636	22.3851	grass snake	https://www.inaturalist.org/observations/145835424	2022-04-22	2022-04-22		Warsaw	569	open	false	gps	gps	2023-01-04 16:32:00 UTC	2023-01-08 03:43:21 UTC	research	CC-BY-NC
Natrix natrix	2012-05-01 10:23:00 +0300	54.144	24.3886	grass snake	https://www.inaturalist.org/observations/145812793	2012/05/01 10:23 AM	2012-05-01	2012-05-01 07:23:00 UTC	Vilnius	94	open	false			2023-01-04 08:10:55 UTC	2023-01-08 03:43:01 UTC	research	CC-BY-NC
Natrix natrix	2022-05-12 17:20:00 +0300	55.1045	37.7724	grass snake	https://www.inaturalist.org/observations/145741472	2022/05/12 17:20	2022-05-12	2022-05-12 14:20:00 UTC	St. Petersburg	31	open	false			2023-01-03 09:21:51 UTC	2023-01-08 03:42:53 UTC	research	CC-BY-NC
Natrix natrix	2022-05-06 15:13:00 +0300	55.1164	37.7587	grass snake	https://www.inaturalist.org/observations/145741432	2022/05/06 15:13	2022-05-06	2022-05-06 12:13:00 UTC	St. Petersburg	4	open	false			2023-01-03 09:20:38 UTC	2023-01-08 03:42:43 UTC	research	CC-BY-NC
Natrix natrix	2022-08-11 09:58:46 +0200	52.3915	14.4002	grass snake	https://www.inaturalist.org/observations/145738248	2022-08-11 09:58:46	2022-08-11	2022-08-11 07:58:46 UTC	Berlin	110	open	true	gps	gps	2023-01-03 08:12:52 UTC	2023-01-15 07:52:50 UTC	research	CC-BY
Natrix natrix	2021-05-09 00:00:00 +0300	47.2984	28.2013	grass snake	https://www.inaturalist.org/observations/145696387	2021/05/09 12:00 AM	2021-05-09	2021-05-08 21:00:00 UTC	Europe/Chisinau	122	open	false			2023-01-02 21:29:43 UTC	2023-01-08 03:42:23 UTC	research
Natrix natrix	2021-07-26 16:09:23 +0200	52.2768	14.4272	grass snake	https://www.inaturalist.org/observations/145679385	2021-07-26 16:09:23	2021-07-26	2021-07-26 14:09:23 UTC	Berlin	53	open	true	gps	gps	2023-01-02 17:50:10 UTC	2023-01-15 07:53:15 UTC	research	CC-BY
Natrix natrix	2019-05-18 10:27:14 +0200	52.3122	14.5364	grass snake	https://www.inaturalist.org/observations/145679322	2019-05-18 10:27:14	2019-05-18	2019-05-18 08:27:14 UTC	Berlin	40	open	true	gps	gps	2023-01-02 17:49:24 UTC	2023-01-15 07:53:20 UTC	research	CC-BY
Natrix natrix	2020-05-05 14:48:14 +0300	55.0462	25.5032	grass snake	https://www.inaturalist.org/observations/145604964	2020-05-05 14:48:14	2020-05-05	2020-05-05 11:48:14 UTC	Vilnius	#N/A	open	false	gps	gps	2023-01-01 20:39:02 UTC	2023-01-08 03:45:25 UTC	research
Natrix natrix natrix	2021-06-28 14:19:47 +0200	52.3677	14.4973		https://www.inaturalist.org/observations/145600997	2021-06-28 14:19:47	2021-06-28	2021-06-28 12:19:47 UTC	Berlin	87	open	true	gps	gps	2023-01-01 19:49:59 UTC	2023-01-16 14:04:57 UTC	research	CC-BY
Natrix natrix	2022-04-23 17:49:00 +0300	55.1183	37.7562	grass snake	https://www.inaturalist.org/observations/145570174	2022/04/23 17:49	2022-04-23	2022-04-23 14:49:00 UTC	St. Petersburg	15	open	false			2023-01-01 11:21:58 UTC	2023-01-08 03:45:05 UTC	research	CC-BY-NC
Natrix natrix	2022-09-27 13:50:00 +0200	49.0377	11.3826	grass snake	https://www.inaturalist.org/observations/145433649	2022/09/27 13:50	2022-09-27	2022-09-27 11:50:00 UTC	Berlin	#N/A	open	false			2022-12-30 16:41:32 UTC	2023-01-08 03:44:33 UTC	research	CC-BY
Natrix natrix	2019-06-22 00:00:00 +0300	47.2958	28.0501	grass snake	https://www.inaturalist.org/observations/145414114	2019/06/22 12:00 AM	2019-06-22	2019-06-21 21:00:00 UTC	Europe/Chisinau	13	open	false	gps	gps	2022-12-30 09:26:21 UTC	2023-01-08 03:44:17 UTC	research
Natrix natrix	2015-08-16 09:21:00 +0300	46.5248	28.7548	grass snake	https://www.inaturalist.org/observations/145404922	2015/08/16 9:21 AM	2015-08-16	2015-08-16 06:21:00 UTC	Europe/Chisinau	15	open	false			2022-12-30 05:00:13 UTC	2022-12-30 19:34:24 UTC	research	CC-BY-NC
Natrix natrix	2019-04-25 11:20:16 +0200	53.0705	14.3138	grass snake	https://www.inaturalist.org/observations/145378182	2019-04-25 11:20:16	2019-04-25	2019-04-25 09:20:16 UTC	Berlin	3	open	false	gps	gps	2022-12-29 21:47:04 UTC	2022-12-30 19:34:32 UTC	research	CC-BY-NC
Natrix natrix	2022-07-21 09:35:00 +0200	48.9188	13.4105	grass snake	https://www.inaturalist.org/observations/145375600	2022/07/21 09:35	2022-07-21	2022-07-21 07:35:00 UTC	Berlin	15	open	false			2022-12-29 21:09:41 UTC	2022-12-30 19:34:41 UTC	research	CC-BY-NC
Natrix natrix	2022-09-22 11:52:00 +0300	50.3609	40.9924	grass snake	https://www.inaturalist.org/observations/145365687	2022/09/22 11:52	2022-09-22	2022-09-22 08:52:00 UTC	St. Petersburg	15	open	false			2022-12-29 18:34:19 UTC	2022-12-30 19:34:53 UTC	research	CC-BY-NC
Natrix natrix	2022-09-22 11:19:00 +0300	50.3671	40.9818	grass snake	https://www.inaturalist.org/observations/145365262	2022/09/22 11:19	2022-09-22	2022-09-22 08:19:00 UTC	St. Petersburg	8	open	false			2022-12-29 18:26:27 UTC	2022-12-30 19:35:04 UTC	research	CC-BY-NC
Natrix natrix	2017-06-19 00:00:00 +0100	51.91	14.1781	grass snake	https://www.inaturalist.org/observations/145339975	2017-06-19	2017-06-19		Berlin	#N/A	open	false			2022-12-29 13:08:11 UTC	2022-12-29 13:08:11 UTC	casual
Natrix natrix	2020-06-02 00:00:00 +0100	52.3101	12.9707	grass snake	https://www.inaturalist.org/observations/145339156	2020-06-02	2020-06-02		Berlin	#N/A	open	false			2022-12-29 13:06:14 UTC	2022-12-29 13:06:14 UTC	casual
Natrix natrix	2022-04-30 00:00:00 +0100	52.2403	13.038	grass snake	https://www.inaturalist.org/observations/145337266	2022-04-30	2022-04-30		Berlin	#N/A	open	false			2022-12-29 13:02:11 UTC	2022-12-29 13:02:11 UTC	casual
Natrix natrix	2020-02-07 00:00:00 +0100	52.3088	12.97	grass snake	https://www.inaturalist.org/observations/145332734	2020-02-07	2020-02-07		Berlin	#N/A	open	false			2022-12-29 12:53:08 UTC	2022-12-29 12:53:08 UTC	casual
Natrix natrix	2022-09-11 10:47:00 +0300	50.4352	41.0538	grass snake	https://www.inaturalist.org/observations/145331047	2022/09/11 10:47	2022-09-11	2022-09-11 07:47:00 UTC	St. Petersburg	8	open	false			2022-12-29 12:21:21 UTC	2022-12-30 19:35:16 UTC	research	CC-BY-NC
Natrix natrix	2015-04-10 17:18:00 +0300	45.1662	21.8374	grass snake	https://www.inaturalist.org/observations/145290785	2015/04/10 5:18 PM	2015-04-10	2015-04-10 14:18:00 UTC	Bucharest	15	open	false			2022-12-28 22:13:22 UTC	2022-12-30 19:35:37 UTC	research	CC-BY-NC
Natrix natrix	2022-09-29 00:00:00 +0100	52.1887	21.8573	grass snake	https://www.inaturalist.org/observations/145288007	2022-09-29	2022-09-29		Warsaw	338	open	false	gps	gps	2022-12-28 21:30:56 UTC	2022-12-30 19:35:46 UTC	research	CC-BY-NC
Natrix natrix	2019-10-16 19:44:09 +0300	40.1059	23.3193	grass snake	https://www.inaturalist.org/observations/145199645	2019-10-16 19:44:09	2019-10-16	2019-10-16 16:44:09 UTC	Athens	869	open	false	gps	gps	2022-12-27 18:03:19 UTC	2022-12-28 09:32:25 UTC	research	CC-BY-NC
Natrix natrix	2021-09-15 17:18:50 +0200	52.7557	23.7719	grass snake	https://www.inaturalist.org/observations/145199555	2021-09-15 17:18:50	2021-09-15	2021-09-15 15:18:50 UTC	Warsaw	1053	open	false	gps	gps	2022-12-27 18:01:21 UTC	2023-01-19 19:47:19 UTC	research	CC-BY-NC
Natrix natrix	2021-04-17 16:22:45 +0200	49.9605	21.8703	grass snake	https://www.inaturalist.org/observations/145199153	2021-04-17 16:22:45	2021-04-17	2021-04-17 14:22:45 UTC	Warsaw	48	open	false	gps	gps	2022-12-27 17:55:34 UTC	2022-12-28 17:11:16 UTC	research	CC-BY-NC
Natrix natrix	2016-05-23 22:28:51 +0200	49.9606	21.8675	grass snake	https://www.inaturalist.org/observations/145199038	2016-05-23 22:28:51	2016-05-23	2016-05-23 20:28:51 UTC	Warsaw	783	open	false	gps	gps	2022-12-27 17:53:08 UTC	2022-12-28 17:11:22 UTC	research	CC-BY-NC
Natrix natrix	2022-09-05 00:00:00 +0100	54.1121	22.2412	grass snake	https://www.inaturalist.org/observations/145121318	2022-09-05	2022-09-05		Warsaw	244	open	false	gps	gps	2022-12-26 17:57:48 UTC	2022-12-28 09:33:03 UTC	research	CC-BY-NC
Natrix natrix	2022-09-12 00:00:00 +0100	54.1216	22.2732	grass snake	https://www.inaturalist.org/observations/145120552	2022-09-12	2022-09-12		Warsaw	1271	open	false	gps	gps	2022-12-26 17:47:04 UTC	2022-12-28 09:33:09 UTC	research	CC-BY-NC
Natrix natrix	2022-05-28 00:00:00 +0100	58.0793	7.31628	grass snake	https://www.inaturalist.org/observations/145059558	2022-05-28	2022-05-28		Europe/Oslo	180	open	false	gps	gps	2022-12-25 19:17:33 UTC	2022-12-28 09:33:16 UTC	research	CC-BY-NC
Natrix natrix	2020-07-22 19:08:00 +0200	46.7307	13.654	grass snake	https://www.inaturalist.org/observations/145035552	2020/07/22 7:08 PM	2020-07-22	2020-07-22 17:08:00 UTC	Vienna	8	open	false			2022-12-25 10:18:04 UTC	2022-12-28 09:33:25 UTC	research	CC-BY-NC
Natrix natrix	2016-06-18 11:45:00 +0200	58.9183	9.3984	grass snake	https://www.inaturalist.org/observations/145034665	2016/06/18 11:45	2016-06-18	2016-06-18 09:45:00 UTC	Europe/Oslo	#N/A	open	false			2022-12-25 09:53:35 UTC	2023-01-12 14:35:05 UTC	research
Natrix natrix	2022-05-08 10:48:00 +0300	54.4487	36.4898	grass snake	https://www.inaturalist.org/observations/144971369	2022/05/08 10:48	2022-05-08	2022-05-08 07:48:00 UTC	St. Petersburg	#N/A	open	false			2022-12-24 07:35:01 UTC	2022-12-27 16:49:03 UTC	research	CC-BY-NC
Natrix natrix	2008-05-01 15:51:00 +0200	44.687	20.0456	grass snake	https://www.inaturalist.org/observations/144927724	2008/05/01 3:51 PM	2008-05-01	2008-05-01 13:51:00 UTC	Belgrade	4	open	false			2022-12-23 16:11:05 UTC	2022-12-25 09:06:36 UTC	research
Natrix natrix	2016-08-15 11:19:00 +0200	47.7548	16.7608	grass snake	https://www.inaturalist.org/observations/144785858	2016/08/15 11:19	2016-08-15	2016-08-15 09:19:00 UTC	Vienna	8	open	false			2022-12-21 11:44:34 UTC	2022-12-25 09:07:10 UTC	research	CC-BY-NC
Natrix natrix	2017-05-03 14:12:00 +0200	41.869	19.3518	grass snake	https://www.inaturalist.org/observations/144720499	2017/05/03 2:12 PM	2017-05-03	2017-05-03 12:12:00 UTC	Europe/Podgorica	15	open	false			2022-12-20 09:32:02 UTC	2022-12-25 09:07:26 UTC	research
Natrix natrix	2022-08-15 00:00:00 +0100	49.202	22.5247	grass snake	https://www.inaturalist.org/observations/144689759	2022-08-15	2022-08-15		Warsaw	176	open	false	gps	gps	2022-12-19 22:12:37 UTC	2022-12-25 09:07:41 UTC	research	CC-BY-NC
Natrix natrix	2006-08-12 16:42:00 +0300	44.4466	28.7575	grass snake	https://www.inaturalist.org/observations/144684584	2006/08/12 16:42	2006-08-12	2006-08-12 13:42:00 UTC	Bucharest	61	open	false			2022-12-19 20:26:58 UTC	2022-12-25 09:08:07 UTC	research	CC-BY-NC
Natrix natrix	2022-08-09 18:34:00 +0200	46.2388	20.0152	grass snake	https://www.inaturalist.org/observations/144624718	2022/08/09 6:34 PM	2022-08-09	2022-08-09 16:34:00 UTC	Budapest	4	open	false			2022-12-18 21:16:32 UTC	2022-12-18 21:16:32 UTC	needs_id	CC-BY-NC
Natrix natrix	2020-07-18 10:29:00 +0200	52.3361	13.0004	grass snake	https://www.inaturalist.org/observations/144546709	2020/07/18 10:29	2020-07-18	2020-07-18 08:29:00 UTC	Berlin	61	open	false			2022-12-17 17:46:41 UTC	2023-01-17 09:51:50 UTC	research	CC-BY-NC
Natrix natrix	2021-08-24 00:00:00 +0100	46.6903	12.9084	grass snake	https://www.inaturalist.org/observations/144545945	2021/08/24	2021-08-24		Vienna	88	open	false			2022-12-17 17:31:53 UTC	2022-12-18 18:16:43 UTC	research	CC-BY-NC
Natrix natrix	2022-08-16 00:00:00 +0100	52.5172	15.2393	grass snake	https://www.inaturalist.org/observations/144532001	2022-08-16	2022-08-16		Warsaw	242	open	false	gps	gps	2022-12-17 12:54:30 UTC	2022-12-18 13:00:17 UTC	research	CC-BY-NC
Natrix natrix	2022-06-30 12:02:00 +0300	55.7399	40.1801	grass snake	https://www.inaturalist.org/observations/144514727	2022/06/30 12:02	2022-06-30	2022-06-30 09:02:00 UTC	St. Petersburg	#N/A	open	false			2022-12-17 03:50:08 UTC	2022-12-18 13:00:28 UTC	research	CC-BY-NC
Natrix natrix	2022-05-06 15:34:00 +0200	59.0389	11.0117	grass snake	https://www.inaturalist.org/observations/144503800	2022/05/06 3:34 PM	2022-05-06	2022-05-06 13:34:00 UTC	Europe/Oslo	4	open	false			2022-12-16 23:39:24 UTC	2022-12-18 20:41:58 UTC	research	CC-BY-NC
Natrix natrix	2011-05-10 13:50:00 +0400	55.8521	37.369	grass snake	https://www.inaturalist.org/observations/144486472	2011/05/10 13:50	2011-05-10	2011-05-10 09:50:00 UTC	St. Petersburg	31	open	false			2022-12-16 18:17:49 UTC	2022-12-18 20:42:07 UTC	research	CC-BY-NC-ND
Natrix natrix	2022-10-01 14:16:00 +0300	56.9934	41.1289	grass snake	https://www.inaturalist.org/observations/144467067	2022/10/01 14:16	2022-10-01	2022-10-01 11:16:00 UTC	St. Petersburg	#N/A	open	false			2022-12-16 09:38:24 UTC	2022-12-18 20:42:14 UTC	research	CC-BY-NC
Natrix natrix	2021-07-08 17:17:00 +0200	59.0319	11.015	grass snake	https://www.inaturalist.org/observations/144371442	2021/07/08 5:17 PM	2021-07-08	2021-07-08 15:17:00 UTC	Europe/Oslo	4	open	false			2022-12-14 18:52:10 UTC	2022-12-18 20:42:32 UTC	research	CC-BY-NC
Natrix natrix	2020-05-23 15:38:00 +0300	41.1387	26.2131	grass snake	https://www.inaturalist.org/observations/144360813	2020/05/23 3:38 PM	2020-05-23	2020-05-23 12:38:00 UTC	Athens	460	open	false			2022-12-14 14:53:27 UTC	2022-12-18 20:42:43 UTC	research	CC-BY-NC
Natrix natrix	2022-07-16 00:00:00 +0100	48.1562	16.5298	grass snake	https://www.inaturalist.org/observations/144352523	2022-07-16	2022-07-16		Vienna	20	open	false	gps	gps	2022-12-14 10:50:55 UTC	2022-12-18 20:42:56 UTC	research	CC-BY-NC
Natrix natrix	2020-07-16 00:00:00 +0100	48.1837	16.4738	grass snake	https://www.inaturalist.org/observations/144352520	2020-07-16	2020-07-16		Vienna	153	open	false	gps	gps	2022-12-14 10:50:48 UTC	2022-12-18 20:43:08 UTC	research	CC-BY-NC
Natrix natrix	2022-10-12 00:00:00 +0100	52.7378	23.788	grass snake	https://www.inaturalist.org/observations/144322127	2022/10/12	2022-10-12		Warsaw	5	open	false			2022-12-13 22:31:58 UTC	2022-12-13 22:31:58 UTC	casual	CC-BY-NC
Natrix natrix	2022-10-12 14:34:00 +0200	52.7423	23.7766	grass snake	https://www.inaturalist.org/observations/144322126	2022/10/12 14:34	2022-10-12	2022-10-12 12:34:00 UTC	Warsaw	5	open	false			2022-12-13 22:31:58 UTC	2023-01-19 19:49:06 UTC	research	CC-BY-NC
Natrix natrix	2022-08-13 20:05:27 +0300	54.9864	24.0932	grass snake	https://www.inaturalist.org/observations/144218512	2022-08-13 20:05:27	2022-08-13	2022-08-13 17:05:27 UTC	Vilnius	#N/A	open	false	gps	gps	2022-12-12 08:55:15 UTC	2022-12-18 20:43:51 UTC	research
Natrix natrix	2022-05-14 13:26:00 +0300	55.8702	37.749	grass snake	https://www.inaturalist.org/observations/144207146	2022/05/14 13:26	2022-05-14	2022-05-14 10:26:00 UTC	St. Petersburg	#N/A	open	false			2022-12-12 04:05:40 UTC	2022-12-18 20:44:00 UTC	research	CC-BY-NC
Natrix natrix	2015-07-09 10:54:00 +0300	60.2558	19.879	grass snake	https://www.inaturalist.org/observations/144176941	2015/07/09 10:54 AM	2015-07-09	2015-07-09 07:54:00 UTC	Europe/Mariehamn	30	open	false			2022-12-11 20:44:29 UTC	2022-12-19 04:25:56 UTC	research	CC-BY
Natrix natrix	2019-06-09 17:52:00 +0300	54.8266	23.4271	grass snake	https://www.inaturalist.org/observations/144175886	2019/06/09 5:52 PM	2019-06-09	2019-06-09 14:52:00 UTC	Vilnius	15	open	false			2022-12-11 20:29:00 UTC	2022-12-19 04:26:03 UTC	research	CC-BY-NC
Natrix natrix	2022-10-09 12:50:00 +0300	55.9878	42.6863	grass snake	https://www.inaturalist.org/observations/144163931	2022/10/09 12:50	2022-10-09	2022-10-09 09:50:00 UTC	St. Petersburg	4	open	false			2022-12-11 17:39:33 UTC	2022-12-12 06:06:45 UTC	research	CC-BY-NC
Natrix natrix	2022-10-04 16:37:00 +0300	55.9315	42.3469	grass snake	https://www.inaturalist.org/observations/144163587	2022/10/04 16:37	2022-10-04	2022-10-04 13:37:00 UTC	St. Petersburg	3	open	false			2022-12-11 17:35:16 UTC	2022-12-12 06:07:00 UTC	research	CC-BY-NC
Natrix natrix	2022-10-04 15:54:00 +0300	55.9428	42.3862	grass snake	https://www.inaturalist.org/observations/144163436	2022/10/04 15:54	2022-10-04	2022-10-04 12:54:00 UTC	St. Petersburg	3	open	false			2022-12-11 17:33:19 UTC	2022-12-12 06:07:02 UTC	research	CC-BY-NC
Natrix natrix	2022-10-04 13:54:00 +0300	55.97	42.601	grass snake	https://www.inaturalist.org/observations/144163331	2022/10/04 13:54	2022-10-04	2022-10-04 10:54:00 UTC	St. Petersburg	3	open	false			2022-12-11 17:31:23 UTC	2022-12-12 06:07:05 UTC	research	CC-BY-NC
Natrix natrix	2022-10-04 11:58:00 +0300	55.9726	42.5574	grass snake	https://www.inaturalist.org/observations/144163239	2022/10/04 11:58	2022-10-04	2022-10-04 08:58:00 UTC	St. Petersburg	3	open	false			2022-12-11 17:29:36 UTC	2022-12-12 06:07:08 UTC	research	CC-BY-NC
Natrix natrix	2022-10-04 11:52:00 +0300	55.9674	42.5399	grass snake	https://www.inaturalist.org/observations/144163160	2022/10/04 11:52	2022-10-04	2022-10-04 08:52:00 UTC	St. Petersburg	3	open	false			2022-12-11 17:27:51 UTC	2022-12-12 06:07:21 UTC	research	CC-BY-NC
Natrix natrix	2022-10-04 11:47:00 +0300	55.9577	42.5226	grass snake	https://www.inaturalist.org/observations/144163044	2022/10/04 11:47	2022-10-04	2022-10-04 08:47:00 UTC	St. Petersburg	3	open	false			2022-12-11 17:26:22 UTC	2022-12-12 06:07:24 UTC	research	CC-BY-NC
Natrix natrix	2022-10-04 11:42:00 +0300	55.9469	42.5062	grass snake	https://www.inaturalist.org/observations/144162935	2022/10/04 11:42	2022-10-04	2022-10-04 08:42:00 UTC	St. Petersburg	4	open	false			2022-12-11 17:24:49 UTC	2022-12-12 06:07:27 UTC	research	CC-BY-NC
Natrix natrix	2022-10-04 11:15:00 +0300	55.8965	42.4548	grass snake	https://www.inaturalist.org/observations/144162795	2022/10/04 11:15	2022-10-04	2022-10-04 08:15:00 UTC	St. Petersburg	3	open	false			2022-12-11 17:22:09 UTC	2022-12-12 06:07:30 UTC	research	CC-BY-NC
Natrix natrix	2022-10-04 11:04:00 +0300	55.8951	42.4419	grass snake	https://www.inaturalist.org/observations/144162672	2022/10/04 11:04	2022-10-04	2022-10-04 08:04:00 UTC	St. Petersburg	4	open	false			2022-12-11 17:20:23 UTC	2022-12-12 06:56:39 UTC	research	CC-BY-NC
Natrix natrix	2022-10-03 13:31:00 +0300	55.9014	42.3701	grass snake	https://www.inaturalist.org/observations/144162310	2022/10/03 13:31	2022-10-03	2022-10-03 10:31:00 UTC	St. Petersburg	10	open	false			2022-12-11 17:15:29 UTC	2022-12-12 06:56:41 UTC	research	CC-BY-NC
Natrix natrix	2022-10-03 11:35:00 +0300	55.9113	42.4737	grass snake	https://www.inaturalist.org/observations/144162172	2022/10/03 11:35	2022-10-03	2022-10-03 08:35:00 UTC	St. Petersburg	3	open	false			2022-12-11 17:13:01 UTC	2022-12-12 06:56:44 UTC	research	CC-BY-NC
Natrix natrix	2022-09-21 15:18:00 +0300	55.9789	42.5949	grass snake	https://www.inaturalist.org/observations/144158846	2022/09/21 15:18	2022-09-21	2022-09-21 12:18:00 UTC	St. Petersburg	3	open	false			2022-12-11 16:23:56 UTC	2022-12-12 06:56:46 UTC	research	CC-BY-NC
Natrix natrix	2022-09-21 13:10:00 +0300	55.9713	42.5669	grass snake	https://www.inaturalist.org/observations/144158595	2022/09/21 13:10	2022-09-21	2022-09-21 10:10:00 UTC	St. Petersburg	3	open	false			2022-12-11 16:19:17 UTC	2022-12-12 06:56:58 UTC	research	CC-BY-NC
Natrix natrix	2022-09-21 13:05:00 +0300	55.9728	42.5564	grass snake	https://www.inaturalist.org/observations/144158442	2022/09/21 13:05	2022-09-21	2022-09-21 10:05:00 UTC	St. Petersburg	3	open	false			2022-12-11 16:17:46 UTC	2022-12-12 06:57:01 UTC	research	CC-BY-NC
Natrix natrix	2022-09-21 12:32:00 +0300	55.9171	42.4777	grass snake	https://www.inaturalist.org/observations/144158333	2022/09/21 12:32	2022-09-21	2022-09-21 09:32:00 UTC	St. Petersburg	3	open	false			2022-12-11 16:16:12 UTC	2022-12-12 06:57:03 UTC	research	CC-BY-NC
Natrix natrix	2022-09-21 11:53:00 +0300	55.8722	42.4209	grass snake	https://www.inaturalist.org/observations/144158193	2022/09/21 11:53	2022-09-21	2022-09-21 08:53:00 UTC	St. Petersburg	3	open	false			2022-12-11 16:14:05 UTC	2022-12-12 06:57:08 UTC	research	CC-BY-NC
Natrix natrix	2022-09-17 14:57:00 +0300	55.9653	42.5366	grass snake	https://www.inaturalist.org/observations/144158087	2022/09/17 14:57	2022-09-17	2022-09-17 11:57:00 UTC	St. Petersburg	3	open	false			2022-12-11 16:12:12 UTC	2022-12-12 06:57:19 UTC	research	CC-BY-NC
Natrix natrix	2022-09-17 14:55:00 +0300	55.9631	42.5337	grass snake	https://www.inaturalist.org/observations/144158024	2022/09/17 14:55	2022-09-17	2022-09-17 11:55:00 UTC	St. Petersburg	3	open	false			2022-12-11 16:10:39 UTC	2022-12-12 06:57:22 UTC	research	CC-BY-NC
Natrix natrix	2022-09-17 14:33:00 +0300	55.9298	42.4059	grass snake	https://www.inaturalist.org/observations/144157911	2022/09/17 14:33	2022-09-17	2022-09-17 11:33:00 UTC	St. Petersburg	3	open	false			2022-12-11 16:09:12 UTC	2022-12-12 06:57:25 UTC	research	CC-BY-NC
Natrix natrix	2022-09-17 14:27:00 +0300	55.9419	42.3867	grass snake	https://www.inaturalist.org/observations/144157819	2022/09/17 14:27	2022-09-17	2022-09-17 11:27:00 UTC	St. Petersburg	3	open	false			2022-12-11 16:08:01 UTC	2022-12-12 06:57:29 UTC	research	CC-BY-NC
Natrix natrix	2022-09-17 14:21:00 +0300	55.9575	42.3696	grass snake	https://www.inaturalist.org/observations/144157711	2022/09/17 14:21	2022-09-17	2022-09-17 11:21:00 UTC	St. Petersburg	3	open	false			2022-12-11 16:06:21 UTC	2022-12-12 06:57:41 UTC	research	CC-BY-NC
Natrix natrix	2022-09-17 13:57:00 +0300	55.891	42.3737	grass snake	https://www.inaturalist.org/observations/144157587	2022/09/17 13:57	2022-09-17	2022-09-17 10:57:00 UTC	St. Petersburg	3	open	false			2022-12-11 16:04:50 UTC	2022-12-12 06:57:44 UTC	research	CC-BY-NC
Natrix natrix	2022-09-13 14:53:00 +0300	55.9237	42.3572	grass snake	https://www.inaturalist.org/observations/144157406	2022/09/13 14:53	2022-09-13	2022-09-13 11:53:00 UTC	St. Petersburg	3	open	false			2022-12-11 16:02:04 UTC	2022-12-12 06:57:47 UTC	research	CC-BY-NC
Natrix natrix	2022-09-13 14:30:00 +0300	55.9454	42.3848	grass snake	https://www.inaturalist.org/observations/144157340	2022/09/13 14:30	2022-09-13	2022-09-13 11:30:00 UTC	St. Petersburg	3	open	false			2022-12-11 16:00:51 UTC	2022-12-12 06:57:51 UTC	research	CC-BY-NC
Natrix natrix	2022-09-13 14:28:00 +0300	55.9415	42.3868	grass snake	https://www.inaturalist.org/observations/144157236	2022/09/13 14:28	2022-09-13	2022-09-13 11:28:00 UTC	St. Petersburg	3	open	false			2022-12-11 15:59:16 UTC	2022-12-12 06:58:04 UTC	research	CC-BY-NC
Natrix natrix	2022-09-13 14:26:00 +0300	55.9404	42.3873	grass snake	https://www.inaturalist.org/observations/144157066	2022/09/13 14:26	2022-09-13	2022-09-13 11:26:00 UTC	St. Petersburg	3	open	false			2022-12-11 15:57:45 UTC	2022-12-12 06:58:07 UTC	research	CC-BY-NC
Natrix natrix	2022-09-13 14:25:00 +0300	55.9403	42.3874	grass snake	https://www.inaturalist.org/observations/144156965	2022/09/13 14:25	2022-09-13	2022-09-13 11:25:00 UTC	St. Petersburg	3	open	false			2022-12-11 15:56:15 UTC	2022-12-12 06:58:10 UTC	research	CC-BY-NC
Natrix natrix	2022-09-13 14:18:00 +0300	55.9292	42.4075	grass snake	https://www.inaturalist.org/observations/144156809	2022/09/13 14:18	2022-09-13	2022-09-13 11:18:00 UTC	St. Petersburg	3	open	false			2022-12-11 15:54:37 UTC	2022-12-12 06:58:13 UTC	research	CC-BY-NC
Natrix natrix	2022-09-13 13:42:00 +0300	55.969	42.5449	grass snake	https://www.inaturalist.org/observations/144156665	2022/09/13 13:42	2022-09-13	2022-09-13 10:42:00 UTC	St. Petersburg	3	open	false			2022-12-11 15:52:39 UTC	2022-12-12 06:58:25 UTC	research	CC-BY-NC
Natrix natrix	2022-09-13 13:04:00 +0300	55.9089	42.4724	grass snake	https://www.inaturalist.org/observations/144156563	2022/09/13 13:04	2022-09-13	2022-09-13 10:04:00 UTC	St. Petersburg	3	open	false			2022-12-11 15:50:48 UTC	2022-12-12 06:58:27 UTC	research	CC-BY-NC
Natrix natrix	2022-09-13 12:15:00 +0300	55.8504	42.4443	grass snake	https://www.inaturalist.org/observations/144156373	2022/09/13 12:15	2022-09-13	2022-09-13 09:15:00 UTC	St. Petersburg	3	open	false			2022-12-11 15:48:59 UTC	2022-12-12 06:58:30 UTC	research	CC-BY-NC
Natrix natrix	2022-09-13 12:14:00 +0300	55.8501	42.4433	grass snake	https://www.inaturalist.org/observations/144156237	2022/09/13 12:14	2022-09-13	2022-09-13 09:14:00 UTC	St. Petersburg	3	open	false			2022-12-11 15:47:34 UTC	2022-12-12 06:58:32 UTC	research	CC-BY-NC
Natrix natrix	2022-09-13 12:11:00 +0300	55.8509	42.4389	grass snake	https://www.inaturalist.org/observations/144156146	2022/09/13 12:11	2022-09-13	2022-09-13 09:11:00 UTC	St. Petersburg	3	open	false			2022-12-11 15:46:03 UTC	2022-12-12 06:58:47 UTC	research	CC-BY-NC
Natrix natrix	2022-09-13 12:06:00 +0300	55.8452	42.4334	grass snake	https://www.inaturalist.org/observations/144156087	2022/09/13 12:06	2022-09-13	2022-09-13 09:06:00 UTC	St. Petersburg	3	open	false			2022-12-11 15:44:41 UTC	2022-12-12 06:58:49 UTC	research	CC-BY-NC
Natrix natrix	2022-09-13 11:40:00 +0300	55.8396	42.4379	grass snake	https://www.inaturalist.org/observations/144155806	2022/09/13 11:40	2022-09-13	2022-09-13 08:40:00 UTC	St. Petersburg	3	open	false			2022-12-11 15:40:21 UTC	2022-12-12 06:58:51 UTC	research	CC-BY-NC
Natrix natrix	2022-09-13 11:33:00 +0300	55.8436	42.4302	grass snake	https://www.inaturalist.org/observations/144155638	2022/09/13 11:33	2022-09-13	2022-09-13 08:33:00 UTC	St. Petersburg	3	open	false			2022-12-11 15:38:03 UTC	2022-12-12 06:58:54 UTC	research	CC-BY-NC
Natrix natrix	2022-09-13 11:32:00 +0300	55.8437	42.4299	grass snake	https://www.inaturalist.org/observations/144155395	2022/09/13 11:32	2022-09-13	2022-09-13 08:32:00 UTC	St. Petersburg	3	open	false			2022-12-11 15:36:27 UTC	2022-12-12 06:59:09 UTC	research	CC-BY-NC
Natrix natrix	2022-09-11 17:05:00 +0300	55.9417	42.3867	grass snake	https://www.inaturalist.org/observations/144155286	2022/09/11 17:05	2022-09-11	2022-09-11 14:05:00 UTC	St. Petersburg	3	open	false			2022-12-11 15:34:02 UTC	2022-12-12 06:59:11 UTC	research	CC-BY-NC
Natrix natrix	2022-09-11 16:50:00 +0300	55.9232	42.4369	grass snake	https://www.inaturalist.org/observations/144155191	2022/09/11 16:50	2022-09-11	2022-09-11 13:50:00 UTC	St. Petersburg	3	open	false			2022-12-11 15:32:21 UTC	2022-12-12 06:59:13 UTC	research	CC-BY-NC
Natrix natrix	2022-09-11 14:59:00 +0300	55.9391	42.3874	grass snake	https://www.inaturalist.org/observations/144155083	2022/09/11 14:59	2022-09-11	2022-09-11 11:59:00 UTC	St. Petersburg	3	open	false			2022-12-11 15:30:38 UTC	2022-12-12 06:59:16 UTC	research	CC-BY-NC
Natrix natrix	2022-09-11 14:38:00 +0300	55.9266	42.3534	grass snake	https://www.inaturalist.org/observations/144154968	2022/09/11 14:38	2022-09-11	2022-09-11 11:38:00 UTC	St. Petersburg	3	open	false			2022-12-11 15:28:58 UTC	2022-12-12 06:59:30 UTC	research	CC-BY-NC
Natrix natrix	2022-09-11 14:36:00 +0300	55.9203	42.3611	grass snake	https://www.inaturalist.org/observations/144154810	2022/09/11 14:36	2022-09-11	2022-09-11 11:36:00 UTC	St. Petersburg	3	open	false			2022-12-11 15:26:26 UTC	2022-12-23 18:14:00 UTC	research	CC-BY-NC
Natrix natrix	2022-09-11 14:33:00 +0300	55.9199	42.3615	grass snake	https://www.inaturalist.org/observations/144154719	2022/09/11 14:33	2022-09-11	2022-09-11 11:33:00 UTC	St. Petersburg	3	open	false			2022-12-11 15:24:23 UTC	2022-12-12 06:59:35 UTC	research	CC-BY-NC
Natrix natrix	2022-09-04 14:57:00 +0300	55.968	42.5421	grass snake	https://www.inaturalist.org/observations/144154559	2022/09/04 14:57	2022-09-04	2022-09-04 11:57:00 UTC	St. Petersburg	3	open	false			2022-12-11 15:22:50 UTC	2022-12-12 06:59:38 UTC	research	CC-BY-NC
Natrix natrix	2022-09-04 13:21:00 +0300	55.8977	42.3713	grass snake	https://www.inaturalist.org/observations/144154424	2022/09/04 13:21	2022-09-04	2022-09-04 10:21:00 UTC	St. Petersburg	3	open	false			2022-12-11 15:20:58 UTC	2022-12-12 06:59:53 UTC	research	CC-BY-NC
Natrix natrix	2022-08-15 14:19:00 +0300	55.9683	42.5994	grass snake	https://www.inaturalist.org/observations/144154222	2022/08/15 14:19	2022-08-15	2022-08-15 11:19:00 UTC	St. Petersburg	3	open	false			2022-12-11 15:17:38 UTC	2022-12-12 06:59:55 UTC	research	CC-BY-NC
Natrix natrix	2022-08-15 13:37:00 +0300	55.9789	42.5952	grass snake	https://www.inaturalist.org/observations/144154147	2022/08/15 13:37	2022-08-15	2022-08-15 10:37:00 UTC	St. Petersburg	3	open	false			2022-12-11 15:15:52 UTC	2022-12-12 06:59:58 UTC	research	CC-BY-NC
Natrix natrix	2022-08-15 11:22:00 +0300	55.9237	42.4657	grass snake	https://www.inaturalist.org/observations/144154040	2022/08/15 11:22	2022-08-15	2022-08-15 08:22:00 UTC	St. Petersburg	3	open	false			2022-12-11 15:13:46 UTC	2022-12-12 07:00:01 UTC	research	CC-BY-NC
Natrix natrix	2022-08-12 14:30:00 +0300	55.9895	42.6941	grass snake	https://www.inaturalist.org/observations/144153925	2022/08/12 14:30	2022-08-12	2022-08-12 11:30:00 UTC	St. Petersburg	3	open	false			2022-12-11 15:11:16 UTC	2022-12-12 07:00:14 UTC	research	CC-BY-NC
Natrix natrix	2022-08-12 14:17:00 +0300	55.9887	42.7095	grass snake	https://www.inaturalist.org/observations/144153801	2022/08/12 14:17	2022-08-12	2022-08-12 11:17:00 UTC	St. Petersburg	3	open	false			2022-12-11 15:08:38 UTC	2022-12-12 07:00:16 UTC	research	CC-BY-NC
Natrix natrix	2022-07-05 18:23:00 +0300	55.9662	42.538	grass snake	https://www.inaturalist.org/observations/144152107	2022/07/05 18:23	2022-07-05	2022-07-05 15:23:00 UTC	St. Petersburg	3	open	false			2022-12-11 14:40:00 UTC	2022-12-12 07:00:18 UTC	research	CC-BY-NC
Natrix natrix	2022-07-05 09:13:00 +0300	55.7966	42.2499	grass snake	https://www.inaturalist.org/observations/144151987	2022/07/05 09:13	2022-07-05	2022-07-05 06:13:00 UTC	St. Petersburg	3	open	false			2022-12-11 14:38:26 UTC	2022-12-12 07:00:20 UTC	research	CC-BY-NC
Natrix natrix	2022-06-30 11:46:00 +0300	56.0707	42.6862	grass snake	https://www.inaturalist.org/observations/144151836	2022/06/30 11:46	2022-06-30	2022-06-30 08:46:00 UTC	St. Petersburg	3	open	false			2022-12-11 14:35:17 UTC	2022-12-12 07:00:34 UTC	research	CC-BY-NC
Natrix natrix	2022-06-26 19:12:00 +0300	55.9072	42.4239	grass snake	https://www.inaturalist.org/observations/144151754	2022/06/26 19:12	2022-06-26	2022-06-26 16:12:00 UTC	St. Petersburg	3	open	false			2022-12-11 14:33:28 UTC	2022-12-12 07:00:36 UTC	research	CC-BY-NC
Natrix natrix	2022-06-24 20:03:00 +0300	55.9094	42.4238	grass snake	https://www.inaturalist.org/observations/144151597	2022/06/24 20:03	2022-06-24	2022-06-24 17:03:00 UTC	St. Petersburg	3	open	false			2022-12-11 14:30:58 UTC	2022-12-12 07:00:38 UTC	research	CC-BY-NC
Natrix natrix	2022-06-24 17:24:00 +0300	55.9762	42.5964	grass snake	https://www.inaturalist.org/observations/144151442	2022/06/24 17:24	2022-06-24	2022-06-24 14:24:00 UTC	St. Petersburg	3	open	false			2022-12-11 14:29:00 UTC	2022-12-12 07:00:40 UTC	research	CC-BY-NC
Natrix natrix	2022-06-24 16:10:00 +0300	55.9654	42.5959	grass snake	https://www.inaturalist.org/observations/144151304	2022/06/24 16:10	2022-06-24	2022-06-24 13:10:00 UTC	St. Petersburg	3	open	false			2022-12-11 14:26:59 UTC	2022-12-12 07:00:52 UTC	research	CC-BY-NC
Natrix natrix	2022-06-24 13:38:00 +0300	55.9892	42.7157	grass snake	https://www.inaturalist.org/observations/144151175	2022/06/24 13:38	2022-06-24	2022-06-24 10:38:00 UTC	St. Petersburg	3	open	false			2022-12-11 14:25:07 UTC	2022-12-12 07:00:54 UTC	research	CC-BY-NC
Natrix natrix	2022-06-24 09:46:00 +0300	56.0871	42.6719	grass snake	https://www.inaturalist.org/observations/144151007	2022/06/24 09:46	2022-06-24	2022-06-24 06:46:00 UTC	St. Petersburg	3	open	false			2022-12-11 14:21:42 UTC	2022-12-12 07:00:56 UTC	research	CC-BY-NC
Natrix natrix	2022-06-17 13:20:00 +0300	55.8739	42.3416	grass snake	https://www.inaturalist.org/observations/144150836	2022/06/17 13:20	2022-06-17	2022-06-17 10:20:00 UTC	St. Petersburg	3	open	false			2022-12-11 14:18:20 UTC	2022-12-12 07:00:58 UTC	research	CC-BY-NC
Natrix natrix	2022-06-12 13:08:00 +0300	56.0771	42.6868	grass snake	https://www.inaturalist.org/observations/144150610	2022/06/12 13:08	2022-06-12	2022-06-12 10:08:00 UTC	St. Petersburg	3	open	false			2022-12-11 14:15:14 UTC	2022-12-12 07:01:13 UTC	research	CC-BY-NC
Natrix natrix	2022-06-09 17:38:00 +0300	55.9531	42.5914	grass snake	https://www.inaturalist.org/observations/144150399	2022/06/09 17:38	2022-06-09	2022-06-09 14:38:00 UTC	St. Petersburg	3	open	false			2022-12-11 14:11:17 UTC	2022-12-12 07:01:16 UTC	research	CC-BY-NC
Natrix natrix	2022-06-09 16:47:00 +0300	55.9526	42.5921	grass snake	https://www.inaturalist.org/observations/144150235	2022/06/09 16:47	2022-06-09	2022-06-09 13:47:00 UTC	St. Petersburg	3	open	false			2022-12-11 14:08:37 UTC	2022-12-12 07:01:18 UTC	research	CC-BY-NC
Natrix natrix	2022-06-09 16:20:00 +0300	55.9692	42.5998	grass snake	https://www.inaturalist.org/observations/144150171	2022/06/09 16:20	2022-06-09	2022-06-09 13:20:00 UTC	St. Petersburg	3	open	false			2022-12-11 14:06:58 UTC	2022-12-12 07:01:20 UTC	research	CC-BY-NC
Natrix natrix	2022-06-09 09:50:00 +0300	56.1112	42.4972	grass snake	https://www.inaturalist.org/observations/144150021	2022/06/09 09:50	2022-06-09	2022-06-09 06:50:00 UTC	St. Petersburg	3	open	false			2022-12-11 14:04:24 UTC	2022-12-12 07:01:37 UTC	research	CC-BY-NC
Natrix natrix	2022-06-01 18:11:00 +0300	55.9826	42.5922	grass snake	https://www.inaturalist.org/observations/144149747	2022/06/01 18:11	2022-06-01	2022-06-01 15:11:00 UTC	St. Petersburg	3	open	false			2022-12-11 14:00:37 UTC	2022-12-12 07:01:38 UTC	research	CC-BY-NC
Natrix natrix	2022-06-01 13:45:00 +0300	56.0511	42.6817	grass snake	https://www.inaturalist.org/observations/144149472	2022/06/01 13:45	2022-06-01	2022-06-01 10:45:00 UTC	St. Petersburg	3	open	false			2022-12-11 13:55:31 UTC	2022-12-12 07:01:40 UTC	research	CC-BY-NC
Natrix natrix	2022-06-01 11:06:00 +0300	56.0989	42.5581	grass snake	https://www.inaturalist.org/observations/144149423	2022/06/01 11:06	2022-06-01	2022-06-01 08:06:00 UTC	St. Petersburg	3	open	false			2022-12-11 13:53:47 UTC	2022-12-12 07:01:43 UTC	research	CC-BY-NC
Natrix natrix	2022-05-31 15:02:00 +0300	55.8282	42.3596	grass snake	https://www.inaturalist.org/observations/144149305	2022/05/31 15:02	2022-05-31	2022-05-31 12:02:00 UTC	St. Petersburg	3	open	false			2022-12-11 13:51:40 UTC	2022-12-12 07:01:56 UTC	research	CC-BY-NC
Natrix natrix	2022-05-31 14:37:00 +0300	55.8344	42.3477	grass snake	https://www.inaturalist.org/observations/144149190	2022/05/31 14:37	2022-05-31	2022-05-31 11:37:00 UTC	St. Petersburg	3	open	false			2022-12-11 13:49:49 UTC	2022-12-12 07:01:58 UTC	research	CC-BY-NC
Natrix natrix	2022-05-31 13:48:00 +0300	55.8439	42.3453	grass snake	https://www.inaturalist.org/observations/144149105	2022/05/31 13:48	2022-05-31	2022-05-31 10:48:00 UTC	St. Petersburg	3	open	false			2022-12-11 13:47:46 UTC	2022-12-19 04:30:38 UTC	research	CC-BY-NC
Natrix natrix	2022-05-31 13:08:00 +0300	55.8348	42.3371	grass snake	https://www.inaturalist.org/observations/144148958	2022/05/31 13:08	2022-05-31	2022-05-31 10:08:00 UTC	St. Petersburg	15	open	false			2022-12-11 13:44:50 UTC	2022-12-12 07:02:01 UTC	research	CC-BY-NC
Natrix natrix	2022-10-22 00:00:00 +0100	53.4199	18.7553	grass snake	https://www.inaturalist.org/observations/144083051	2022-10-22	2022-10-22		Warsaw	558	open	false	gps	gps	2022-12-10 16:52:46 UTC	2022-12-19 04:30:23 UTC	research	CC-BY-NC
Natrix natrix	2020-07-22 13:19:00 +0200	48.2298	11.0938	grass snake	https://www.inaturalist.org/observations/144072259	2020/07/22 13:19	2020-07-22	2020-07-22 11:19:00 UTC	Berlin	15	open	false			2022-12-10 13:30:29 UTC	2022-12-11 15:08:17 UTC	research	CC-BY-NC
Natrix natrix	2022-09-02 00:00:00 +0100	53.2597	17.2522	grass snake	https://www.inaturalist.org/observations/144060702	2022-09-02	2022-09-02		Warsaw	130	open	false	gps	gps	2022-12-10 08:45:26 UTC	2022-12-19 04:29:59 UTC	research	CC-BY-NC
Natrix natrix	2020-09-14 16:47:00 +0200	51.4252	21.9475	grass snake	https://www.inaturalist.org/observations/144035434	2020/09/14 16:47	2020-09-14	2020-09-14 14:47:00 UTC	Warsaw	#N/A	open	false			2022-12-09 23:15:00 UTC	2022-12-19 04:29:49 UTC	research	CC-BY-NC
Natrix natrix	2022-10-09 11:17:00 +0200	52.7304	23.7167	grass snake	https://www.inaturalist.org/observations/144033635	2022/10/09 11:17	2022-10-09	2022-10-09 09:17:00 UTC	Warsaw	5	open	false			2022-12-09 22:40:44 UTC	2023-01-19 19:50:54 UTC	research	CC-BY-NC
Natrix natrix	2022-08-02 11:13:00 +0200	52.4803	19.3674	grass snake	https://www.inaturalist.org/observations/144016970	2022/08/02 11:13	2022-08-02	2022-08-02 09:13:00 UTC	Warsaw	31	open	true			2022-12-09 17:50:24 UTC	2022-12-19 04:29:25 UTC	research	CC-BY-NC
Natrix natrix	2011-07-22 08:31:00 +0300	45.1473	29.6754	grass snake	https://www.inaturalist.org/observations/143995504	2011/07/22 08:31	2011-07-22	2011-07-22 05:31:00 UTC	Bucharest	120	open	false			2022-12-09 09:48:58 UTC	2022-12-19 04:29:00 UTC	research	CC-BY-NC
Natrix natrix	2017-05-14 11:25:00 +0200	45.6082	18.7909	grass snake	https://www.inaturalist.org/observations/143972709	2017/05/14 11:25	2017-05-14	2017-05-14 09:25:00 UTC	Zagreb	80	open	false			2022-12-09 00:59:21 UTC	2023-02-11 20:23:13 UTC	research	CC-BY-NC
Natrix natrix	2017-05-11 11:55:00 +0200	42.2457	19.0905	grass snake	https://www.inaturalist.org/observations/143972418	2017/05/11 11:55	2017-05-11	2017-05-11 09:55:00 UTC	Europe/Podgorica	11	open	false			2022-12-09 00:55:54 UTC	2022-12-19 04:28:34 UTC	research	CC-BY-NC
Natrix natrix	2022-04-18 00:00:00 +0100	51.6521	15.1228	grass snake	https://www.inaturalist.org/observations/143884005	2022-04-18	2022-04-18		Warsaw	244	open	false	gps	gps	2022-12-07 19:22:51 UTC	2022-12-19 04:28:14 UTC	research	CC-BY-NC
Natrix natrix	2022-08-02 14:47:49 +0300	60.567	24.752	grass snake	https://www.inaturalist.org/observations/143853455	2022-08-02 14:47:49	2022-08-02	2022-08-02 11:47:49 UTC	Helsinki	25	open	false	gps	gps	2022-12-07 08:15:03 UTC	2022-12-19 04:28:06 UTC	research
Natrix natrix	2020-05-23 13:59:00 +0200	52.0282	22.2259	grass snake	https://www.inaturalist.org/observations/143678782	2020/05/23 13:59	2020-05-23	2020-05-23 11:59:00 UTC	Warsaw	#N/A	open	false			2022-12-04 22:23:56 UTC	2022-12-06 05:25:03 UTC	research	CC-BY-NC
Natrix natrix	2020-05-04 18:13:00 +0200	51.3535	21.9428	grass snake	https://www.inaturalist.org/observations/143678779	2020/05/04 18:13	2020-05-04	2020-05-04 16:13:00 UTC	Warsaw	#N/A	open	false			2022-12-04 22:23:54 UTC	2022-12-06 05:25:11 UTC	research	CC-BY-NC
Natrix natrix	2020-06-28 12:20:00 +0300	36.1341	33.2844	grass snake	https://www.inaturalist.org/observations/143633228	2020/06/28 12:20 PM	2020-06-28	2020-06-28 09:20:00 UTC	Istanbul	1192	open	false			2022-12-04 10:37:12 UTC	2023-01-16 14:58:24 UTC	research
Natrix natrix	2014-06-07 17:05:00 +0300	54.8501	28.6778	grass snake	https://www.inaturalist.org/observations/143608631	2014/06/07 17:05	2014-06-07	2014-06-07 14:05:00 UTC	Minsk	152	open	false			2022-12-04 01:36:09 UTC	2022-12-09 05:00:43 UTC	research	CC-BY-NC
Natrix natrix	2022-08-10 17:56:32 +0300	56.4986	44.8048	grass snake	https://www.inaturalist.org/observations/143548871	2022-08-10 17:56:32	2022-08-10	2022-08-10 14:56:32 UTC	St. Petersburg	291	open	false	gps	gps	2022-12-03 07:27:58 UTC	2022-12-06 05:25:33 UTC	research	CC-BY-NC
Natrix natrix	2021-05-17 17:26:00 +0300	47.1549	23.8007	grass snake	https://www.inaturalist.org/observations/143501933	2021/05/17 5:26 PM	2021-05-17	2021-05-17 14:26:00 UTC	Bucharest	4	open	false			2022-12-02 16:06:27 UTC	2022-12-07 05:52:24 UTC	research	CC-BY-NC
Natrix natrix	2020-05-09 13:07:00 +0200	49.9583	16.2053	grass snake	https://www.inaturalist.org/observations/143500116	2020/05/09 1:07 PM	2020-05-09	2020-05-09 11:07:00 UTC	Prague	488	open	false			2022-12-02 15:31:04 UTC	2022-12-06 05:25:59 UTC	research
Natrix natrix	2020-04-20 15:19:00 +0200	58.4418	14.1618	grass snake	https://www.inaturalist.org/observations/143478304	2020/04/20 3:19 PM	2020-04-20	2020-04-20 13:19:00 UTC	Stockholm	4	open	false			2022-12-02 05:55:08 UTC	2022-12-06 05:26:08 UTC	research	CC-BY-NC
Natrix natrix	2021-08-27 17:59:47 +0300	47.57	42.2357	grass snake	https://www.inaturalist.org/observations/143477814	2021-08-27 17:59:47+03:00	2021-08-27	2021-08-27 14:59:47 UTC	St. Petersburg	216	open	false			2022-12-02 05:40:22 UTC	2022-12-06 05:26:19 UTC	research
Natrix natrix	2020-09-05 19:39:46 +0300	47.4947	42.3245	grass snake	https://www.inaturalist.org/observations/143476346	2020-09-05 19:39:46+03:00	2020-09-05	2020-09-05 16:39:46 UTC	St. Petersburg	24	open	false			2022-12-02 05:03:27 UTC	2022-12-06 05:26:27 UTC	research
Natrix natrix	2019-04-22 15:14:00 +0200	58.4418	14.1618	grass snake	https://www.inaturalist.org/observations/143440585	2019/04/22 3:14 PM	2019-04-22	2019-04-22 13:14:00 UTC	Stockholm	2	open	false			2022-12-01 18:02:19 UTC	2022-12-06 05:26:44 UTC	research	CC-BY-NC
Natrix natrix	2020-06-26 11:33:00 +0300	49.9013	37.7569	grass snake	https://www.inaturalist.org/observations/143432025	2020/06/26 11:33	2020-06-26	2020-06-26 08:33:00 UTC	Kyiv	31	open	false			2022-12-01 15:23:03 UTC	2022-12-06 05:26:52 UTC	research
Natrix natrix	2021-07-21 04:49:00 +0300	55.52	37.6661	grass snake	https://www.inaturalist.org/observations/143401127	2021/07/21 04:49	2021-07-21	2021-07-21 01:49:00 UTC	St. Petersburg	31	open	false			2022-12-01 01:50:29 UTC	2022-12-06 05:27:00 UTC	research	CC-BY-NC
Natrix natrix	2022-05-18 22:11:00 +0300	47.1575	23.8022	grass snake	https://www.inaturalist.org/observations/143376132	2022/05/18 10:11 PM	2022-05-18	2022-05-18 19:11:00 UTC	Bucharest	4	open	false			2022-11-30 20:23:19 UTC	2022-12-06 05:27:07 UTC	research	CC-BY-NC
Natrix natrix	2022-10-21 00:00:00 +0100	54.2938	20.4867	grass snake	https://www.inaturalist.org/observations/143358922	2022-10-21	2022-10-21		Warsaw	459	open	false	gps	gps	2022-11-30 16:21:57 UTC	2022-12-06 05:27:17 UTC	research	CC-BY-NC
Natrix natrix	2022-05-22 00:00:00 +0100	51.8932	7.94516	grass snake	https://www.inaturalist.org/observations/143349282	2022-05-22	2022-05-22		Berlin	61	open	true			2022-11-30 13:32:05 UTC	2022-11-30 13:33:40 UTC	casual	CC-BY-NC
Natrix natrix	2022-06-17 11:33:00 +0200	45.7553	14.4135	grass snake	https://www.inaturalist.org/observations/143339368	2022/06/17 11:33 AM	2022-06-17	2022-06-17 09:33:00 UTC	Ljubljana	#N/A	open	false			2022-11-30 09:18:45 UTC	2022-12-19 20:57:11 UTC	research	CC-BY-NC
Natrix natrix	2022-08-17 10:03:00 +0200	54.1699	11.9363	grass snake	https://www.inaturalist.org/observations/143338695	2022-08-17 10:03:00+02:00	2022-08-17	2022-08-17 08:03:00 UTC	Berlin	22653	open	false			2022-11-30 09:03:46 UTC	2022-12-06 05:27:38 UTC	research	CC-BY-NC
Natrix natrix	2022-09-26 14:12:01 +0200	43.082	17.4323	grass snake	https://www.inaturalist.org/observations/143256736	2022-09-26 14:12:01	2022-09-26	2022-09-26 12:12:01 UTC	Zagreb	#N/A	open	false	gps	gps	2022-11-29 10:48:47 UTC	2023-02-11 20:23:04 UTC	research	CC-BY-NC
Natrix natrix	2022-07-04 12:48:00 +0300	55.9614	44.7721	grass snake	https://www.inaturalist.org/observations/143251276	2022/07/04 12:48	2022-07-04	2022-07-04 09:48:00 UTC	St. Petersburg	15	open	false			2022-11-29 08:02:47 UTC	2022-12-06 05:27:54 UTC	research	CC-BY-NC
Natrix natrix	2011-07-13 16:32:00 +0200	47.5867	12.1919	grass snake	https://www.inaturalist.org/observations/143169817	2011/07/13 16:32	2011-07-13	2011-07-13 14:32:00 UTC	Vienna	12	open	false			2022-11-28 12:07:21 UTC	2023-01-23 13:26:14 UTC	research	CC-BY-NC
Natrix natrix	2022-07-06 14:35:00 +0200	58.8063	15.3738	grass snake	https://www.inaturalist.org/observations/143041918	2022/07/06 14:35	2022-07-06	2022-07-06 12:35:00 UTC	Stockholm	#N/A	open	false			2022-11-27 15:23:09 UTC	2023-01-24 07:14:11 UTC	research	CC-BY-NC
Natrix natrix	2022-10-13 15:47:52 +0300	52.1794	33.8089	grass snake	https://www.inaturalist.org/observations/143034220	2022-10-13 15:47:52	2022-10-13	2022-10-13 12:47:52 UTC	Kyiv	500	open	false	gps	gps	2022-11-27 14:10:33 UTC	2022-11-29 04:27:48 UTC	research	CC-BY-NC-ND
Natrix natrix	2013-05-27 10:20:00 +0200	48.8288	16.6923	grass snake	https://www.inaturalist.org/observations/142917323	2013/05/27 10:20 AM	2013-05-27	2013-05-27 08:20:00 UTC	Prague	4398	open	false			2022-11-26 15:00:06 UTC	2022-11-29 04:28:16 UTC	research
Natrix natrix	2014-05-31 00:00:00 +0300	44.8754	35.0566	grass snake	https://www.inaturalist.org/observations/142859170	2014-05-31	2014-05-31		Europe/Simferopol	21	open	false			2022-11-25 22:21:51 UTC	2022-11-29 04:28:44 UTC	research	CC-BY-NC
Natrix natrix	2018-07-12 12:47:00 +0200	50.129	9.37847	grass snake	https://www.inaturalist.org/observations/142838416	2018/07/12 12:47	2018-07-12	2018-07-12 10:47:00 UTC	Berlin	8	open	false			2022-11-25 18:31:14 UTC	2022-11-29 04:28:54 UTC	research	CC-BY-NC
Natrix natrix moreotica	2022-07-07 10:17:00 +0200	44.2198	15.2393		https://www.inaturalist.org/observations/142687764	2022/07/07 10:17	2022-07-07	2022-07-07 08:17:00 UTC	Zagreb	8	open	false			2022-11-23 18:24:30 UTC	2023-02-11 20:29:08 UTC	research	CC-BY-NC
Natrix natrix	2022-11-23 12:12:00 +0100	49.3051	9.47385	grass snake	https://www.inaturalist.org/observations/142685317	2022/11/23 12:12	2022-11-23	2022-11-23 11:12:00 UTC	Berlin	31	open	false			2022-11-23 17:47:34 UTC	2022-11-29 04:30:21 UTC	research	CC-BY-NC
Natrix natrix	2022-11-23 12:13:00 +0100	49.3051	9.47374	grass snake	https://www.inaturalist.org/observations/142685315	2022/11/23 12:13	2022-11-23	2022-11-23 11:13:00 UTC	Berlin	122	open	false			2022-11-23 17:47:33 UTC	2022-11-25 01:15:43 UTC	research	CC-BY-NC
Natrix natrix	2019-05-20 12:32:00 +0300	54.6785	25.0528	grass snake	https://www.inaturalist.org/observations/142621795	2019/05/20 12:32 PM	2019-05-20	2019-05-20 09:32:00 UTC	Vilnius	8	open	false			2022-11-22 20:06:44 UTC	2022-11-23 06:51:27 UTC	research	CC-BY-NC
Natrix natrix	2022-08-02 10:57:00 +0200	48.8548	14.7894	grass snake	https://www.inaturalist.org/observations/142621503	2022/08/02 10:57	2022-08-02	2022-08-02 08:57:00 UTC	Prague	#N/A	open	false			2022-11-22 20:00:45 UTC	2022-11-22 20:03:45 UTC	research	CC-BY-NC
Natrix natrix	2022-10-22 15:29:35 +0200	48.1657	16.5399	grass snake	https://www.inaturalist.org/observations/142561476	2022-10-22 15:29:35	2022-10-22	2022-10-22 13:29:35 UTC	Vienna	1782	open	false	gps	gps	2022-11-21 22:40:37 UTC	2022-11-22 06:07:47 UTC	research	CC-BY-NC
Natrix natrix	2022-11-21 13:03:18 +0200	39.361	22.9323	grass snake	https://www.inaturalist.org/observations/142527969	2022-11-21 13:03:18	2022-11-21	2022-11-21 11:03:18 UTC	Athens	#N/A	open	false	gps	gps	2022-11-21 12:41:49 UTC	2022-12-11 17:33:15 UTC	research
Natrix natrix	2015-07-22 17:43:23 +0200	47.4329	13.9416	grass snake	https://www.inaturalist.org/observations/142523092	2015-07-22 17:43:23+02:00	2015-07-22	2015-07-22 15:43:23 UTC	Vienna	53	open	false			2022-11-21 10:30:39 UTC	2022-12-09 17:36:49 UTC	research	CC-BY-NC
Natrix natrix	2022-09-19 16:46:04 +0300	60.6758	22.3193	grass snake	https://www.inaturalist.org/observations/142291703	2022-09-19 16:46:04	2022-09-19	2022-09-19 13:46:04 UTC	Helsinki	85	open	false	gps	gps	2022-11-18 14:41:19 UTC	2022-11-21 06:17:15 UTC	research
Natrix natrix	2022-05-22 17:13:00 +0200	54.3417	10.1963	grass snake	https://www.inaturalist.org/observations/142286488	2022/05/22 17:13	2022-05-22	2022-05-22 15:13:00 UTC	Berlin	#N/A	open	false			2022-11-18 13:02:24 UTC	2022-12-13 22:38:07 UTC	research	CC-BY-NC
Natrix natrix	2022-06-16 09:27:00 +0200	49.5867	20.6441	grass snake	https://www.inaturalist.org/observations/142169076	2022/06/16 09:27	2022-06-16	2022-06-16 07:27:00 UTC	Warsaw	1	open	false			2022-11-16 20:29:12 UTC	2022-11-17 06:07:56 UTC	research	CC-BY-NC
Natrix natrix	2016-06-25 00:00:00 +0300	55.6915	43.5366	grass snake	https://www.inaturalist.org/observations/142168682	2016/06/25	2016-06-25		St. Petersburg	200	open	false			2022-11-16 20:22:12 UTC	2022-11-17 06:08:01 UTC	research	CC-BY-NC
Natrix natrix	2022-06-11 10:16:00 +0200	49.5933	20.6307	grass snake	https://www.inaturalist.org/observations/142168458	2022/06/11 10:16	2022-06-11	2022-06-11 08:16:00 UTC	Warsaw	1	open	false			2022-11-16 20:18:12 UTC	2022-11-17 06:08:05 UTC	research	CC-BY-NC
Natrix natrix	2022-11-16 16:07:12 +0200	41.0005	25.3152	grass snake	https://www.inaturalist.org/observations/142166270	2022-11-16 16:07:12+02:00	2022-11-16	2022-11-16 14:07:12 UTC	Athens	925	open	false			2022-11-16 19:45:26 UTC	2022-12-10 07:03:42 UTC	research	CC-BY-NC
Natrix natrix	2019-04-26 13:36:00 +0200	58.9031	9.36908	grass snake	https://www.inaturalist.org/observations/142103894	2019/04/26 13:36	2019-04-26	2019-04-26 11:36:00 UTC	Europe/Oslo	#N/A	open	false			2022-11-15 23:14:50 UTC	2022-11-16 14:09:44 UTC	research
Natrix natrix	2008-04-24 15:29:21 +0200	55.429	9.42794	grass snake	https://www.inaturalist.org/observations/142096472	2008-04-24 15:29:21	2008-04-24	2008-04-24 13:29:21 UTC	Copenhagen	#N/A	open	false			2022-11-15 21:21:31 UTC	2022-12-30 20:19:33 UTC	research	CC-BY-NC
Natrix natrix	2022-06-08 20:35:59 +0300	55.7605	44.1874	grass snake	https://www.inaturalist.org/observations/142091011	2022-06-08 20:35:59+03:00	2022-06-08	2022-06-08 17:35:59 UTC	St. Petersburg	3044	open	false			2022-11-15 20:10:33 UTC	2022-11-16 14:12:05 UTC	research	CC-BY-NC
Natrix natrix	2022-08-16 14:39:11 +0300	56.811	43.3488	grass snake	https://www.inaturalist.org/observations/142090322	2022-08-16 14:39:11+03:00	2022-08-16	2022-08-16 11:39:11 UTC	St. Petersburg	1484	open	false			2022-11-15 19:58:28 UTC	2022-11-16 14:12:23 UTC	research	CC-BY-NC
Natrix natrix	2022-11-12 12:16:00 +0300	51.6874	35.7222	grass snake	https://www.inaturalist.org/observations/142089698	2022/11/12 12:16	2022-11-12	2022-11-12 09:16:00 UTC	St. Petersburg	15	open	false			2022-11-15 19:48:57 UTC	2022-11-16 06:15:46 UTC	research	CC-BY-NC
Natrix natrix	2020-07-25 00:00:00 +0100	46.363	14.0823	grass snake	https://www.inaturalist.org/observations/142089226	25/07/2020	2020-07-25		Ljubljana	#N/A	open	false			2022-11-15 19:40:36 UTC	2022-11-15 19:40:36 UTC	casual
Natrix natrix	2022-11-06 13:43:00 +0300	56.2212	43.7571	grass snake	https://www.inaturalist.org/observations/142073966	2022/11/06 13:43	2022-11-06	2022-11-06 10:43:00 UTC	St. Petersburg	541	open	false			2022-11-15 15:53:42 UTC	2022-11-16 06:15:50 UTC	research	CC-BY-NC
Natrix natrix	2007-08-26 13:58:11 +0200	55.4286	9.42752	grass snake	https://www.inaturalist.org/observations/142026698	2007-08-26 13:58:11	2007-08-26	2007-08-26 11:58:11 UTC	Copenhagen	#N/A	open	false			2022-11-14 23:33:14 UTC	2022-12-30 20:19:41 UTC	research	CC-BY-NC
Natrix natrix	2022-11-04 07:05:00 +0300	56.6225	44.0931	grass snake	https://www.inaturalist.org/observations/142017541	2022-11-04 07:05:00+03:00	2022-11-04	2022-11-04 04:05:00 UTC	St. Petersburg	214	open	false			2022-11-14 21:34:49 UTC	2022-11-18 08:24:01 UTC	research	CC-BY-NC
Natrix natrix	2020-07-13 14:24:00 +0300	55.9104	37.6911	grass snake	https://www.inaturalist.org/observations/142001841	2020/07/13 14:24	2020-07-13	2020-07-13 11:24:00 UTC	St. Petersburg	94	open	false			2022-11-14 17:55:24 UTC	2022-11-15 07:17:21 UTC	research	CC-BY-NC
Natrix natrix	2021-07-10 14:09:47 +0200	50.0645	14.2943	grass snake	https://www.inaturalist.org/observations/141960317	2021-07-10 14:09:47	2021-07-10	2021-07-10 12:09:47 UTC	Prague	56	open	false	gps	gps	2022-11-14 03:47:04 UTC	2022-11-16 04:11:18 UTC	research	CC-BY-NC
Natrix natrix	2018-06-20 16:43:40 +0200	47.7551	9.62942	grass snake	https://www.inaturalist.org/observations/141934617	2018-06-20 16:43:40	2018-06-20	2018-06-20 14:43:40 UTC	Berlin	179	open	false	gps	gps	2022-11-13 22:39:40 UTC	2022-11-14 19:43:46 UTC	research	CC-BY-NC
Natrix natrix	2022-07-11 08:26:00 +0300	39.0649	20.7702	grass snake	https://www.inaturalist.org/observations/141926119	2022/07/11 08:26	2022-07-11	2022-07-11 05:26:00 UTC	Athens	#N/A	open	false			2022-11-13 21:14:09 UTC	2023-01-23 14:30:13 UTC	research	CC-BY-NC
Natrix natrix	2022-06-12 13:49:00 +0300	61.7177	30.7391	grass snake	https://www.inaturalist.org/observations/141915836	2022/06/12 13:49	2022-06-12	2022-06-12 10:49:00 UTC	St. Petersburg	31	open	false			2022-11-13 19:26:51 UTC	2022-11-14 06:13:02 UTC	research	CC-BY-NC
Natrix natrix	2022-11-12 14:02:00 +0100	41.0135	19.4753	grass snake	https://www.inaturalist.org/observations/141807733	2022/11/12 2:02 PM	2022-11-12	2022-11-12 13:02:00 UTC	Europe/Tirane	5	open	false			2022-11-12 18:53:28 UTC	2022-11-13 02:16:15 UTC	research	CC0
Natrix natrix	2015-09-17 13:39:44 +0200	48.0395	10.8784	grass snake	https://www.inaturalist.org/observations/141527896	2015-09-17 13:39:44	2015-09-17	2015-09-17 11:39:44 UTC	Berlin	154	open	false	gps	gps	2022-11-09 11:20:17 UTC	2022-11-13 02:17:06 UTC	research	CC-BY-NC
Natrix natrix	2022-10-27 12:03:00 +0200	49.5853	20.6484	grass snake	https://www.inaturalist.org/observations/141527316	2022/10/27 12:03	2022-10-27	2022-10-27 10:03:00 UTC	Warsaw	1	open	false			2022-11-09 11:06:28 UTC	2022-11-13 02:17:19 UTC	research	CC-BY-NC
Natrix natrix	2022-11-08 14:57:00 +0300	48.5463	44.536	grass snake	https://www.inaturalist.org/observations/141515110	2022/11/08 14:57	2022-11-08	2022-11-08 11:57:00 UTC	Volgograd	15	open	false			2022-11-09 05:58:08 UTC	2022-11-22 18:12:34 UTC	research	CC-BY
Natrix natrix	2022-08-24 16:56:00 +0300	55.8757	37.8917	grass snake	https://www.inaturalist.org/observations/141510447	2022/08/24 4:56 PM	2022-08-24	2022-08-24 13:56:00 UTC	St. Petersburg	8	open	false			2022-11-09 04:15:26 UTC	2022-11-13 02:17:37 UTC	research	CC-BY-NC
Natrix natrix	2022-10-08 12:37:00 +0300	53.844	30.5656	grass snake	https://www.inaturalist.org/observations/141484439	2022/10/08 12:37	2022-10-08	2022-10-08 09:37:00 UTC	Minsk	61	open	false			2022-11-08 21:06:44 UTC	2022-11-26 06:29:20 UTC	research	CC-BY-NC
Natrix natrix	2017-05-03 18:49:44 +0300	43.9839	39.8698	grass snake	https://www.inaturalist.org/observations/141475455	2017-05-03 18:49:44	2017-05-03	2017-05-03 15:49:44 UTC	St. Petersburg	405	open	false	gps	gps	2022-11-08 19:02:42 UTC	2022-11-15 15:11:27 UTC	research	CC-BY-NC-ND
Natrix natrix	2022-05-15 16:10:00 +0200	54.2622	9.98309	grass snake	https://www.inaturalist.org/observations/141444151	2022/05/15 16:10	2022-05-15	2022-05-15 14:10:00 UTC	Berlin	179	open	false			2022-11-08 09:48:27 UTC	2022-11-14 22:38:48 UTC	research
Natrix natrix	2019-06-02 14:19:00 +0200	46.7826	15.9568	grass snake	https://www.inaturalist.org/observations/141314478	2019/06/02 14:19	2019-06-02	2019-06-02 12:19:00 UTC	Vienna	61	open	false			2022-11-06 22:39:45 UTC	2023-01-24 07:14:07 UTC	research	CC-BY-NC
Natrix natrix	2013-05-18 12:49:00 +0200	46.0714	18.1298	grass snake	https://www.inaturalist.org/observations/141278055	2013/05/18 12:49	2013-05-18	2013-05-18 10:49:00 UTC	Budapest	15	open	false			2022-11-06 16:34:37 UTC	2022-11-07 11:16:58 UTC	research	CC-BY-NC
Natrix natrix	2022-09-14 12:12:00 +0300	38.3677	26.1207	grass snake	https://www.inaturalist.org/observations/141275523	2022/09/14 12:12 PM	2022-09-14	2022-09-14 09:12:00 UTC	Athens	2	open	false			2022-11-06 16:09:20 UTC	2022-11-07 12:49:10 UTC	research	CC-BY-NC
Natrix natrix	2022-11-06 14:24:06 +0100	50.8572	14.4915	grass snake	https://www.inaturalist.org/observations/141270354	2022-11-06 14:24:06+01:00	2022-11-06	2022-11-06 13:24:06 UTC	Prague	11	open	false			2022-11-06 15:13:57 UTC	2022-11-07 11:17:16 UTC	research	CC-BY-NC
Natrix natrix	2022-08-14 14:12:58 +0200	52.1756	14.2568	grass snake	https://www.inaturalist.org/observations/141251020	2022-08-14 14:12:58	2022-08-14	2022-08-14 12:12:58 UTC	Berlin	48	open	false	gps	gps	2022-11-06 10:56:04 UTC	2022-11-07 11:17:28 UTC	research	CC-BY
Natrix natrix	2022-11-05 15:13:09 +0100	55.8351	12.5663	grass snake	https://www.inaturalist.org/observations/141241101	2022-11-05 15:13:09+01:00	2022-11-05	2022-11-05 14:13:09 UTC	Copenhagen	3	open	false			2022-11-06 07:30:45 UTC	2022-12-30 20:20:08 UTC	research	CC-BY-NC
Natrix natrix	2022-10-08 12:23:56 +0300	57.2143	37.7369	grass snake	https://www.inaturalist.org/observations/141139235	2022-10-08 12:23:56+03:00	2022-10-08	2022-10-08 09:23:56 UTC	St. Petersburg	19	open	false			2022-11-05 08:40:19 UTC	2023-01-11 09:05:47 UTC	research	CC-BY
Natrix natrix	2022-10-08 14:43:40 +0300	57.2096	37.7451	grass snake	https://www.inaturalist.org/observations/141137587	2022-10-08 14:43:40+03:00	2022-10-08	2022-10-08 11:43:40 UTC	St. Petersburg	5	open	false			2022-11-05 08:02:04 UTC	2023-01-11 09:05:47 UTC	research	CC-BY
Natrix natrix	2022-05-07 10:35:00 +0200	52.3995	15.8483	grass snake	https://www.inaturalist.org/observations/141130201	2022/05/07 10:35	2022-05-07	2022-05-07 08:35:00 UTC	Warsaw	#N/A	open	false			2022-11-05 05:04:08 UTC	2022-11-07 11:19:14 UTC	research	CC-BY-NC
Natrix natrix	2014-09-20 13:44:00 +0300	60.212	25.2739	grass snake	https://www.inaturalist.org/observations/141092489	2014-09-20 13:44:00	2014-09-20	2014-09-20 10:44:00 UTC	Helsinki	227	open	false	gps	gps	2022-11-04 19:21:31 UTC	2022-11-07 11:19:25 UTC	research	CC-BY-NC
Natrix natrix	2022-10-31 14:08:00 +0100	50.3531	19.1228	grass snake	https://www.inaturalist.org/observations/141089418	2022/10/31 14:08	2022-10-31	2022-10-31 13:08:00 UTC	Warsaw	6	open	false			2022-11-04 18:42:33 UTC	2022-11-07 11:19:36 UTC	research	CC-BY-NC
Natrix natrix	2018-07-01 16:54:00 +0300	57.6246	38.3676	grass snake	https://www.inaturalist.org/observations/141066797	2018/07/01 16:54	2018-07-01	2018-07-01 13:54:00 UTC	St. Petersburg	5	open	false			2022-11-04 13:53:33 UTC	2023-01-11 09:05:47 UTC	research	CC-BY
Natrix natrix	2022-06-03 00:00:00 +0200	50.3188	32.4569	grass snake	https://www.inaturalist.org/observations/140982201	2022-06-03	2022-06-03		Kyiv	28547	open	false	gps	gps	2022-11-03 15:03:26 UTC	2022-11-07 11:26:05 UTC	research	CC-BY-NC
Natrix natrix	2022-11-02 00:00:00 +0200	42.3873	27.7051	grass snake	https://www.inaturalist.org/observations/140900132	2022-11-02	2022-11-02		Sofia	180	open	false	gps	gps	2022-11-02 18:42:05 UTC	2022-11-07 12:50:44 UTC	research
Natrix natrix	2020-05-30 12:14:00 +0300	51.4136	23.719	grass snake	https://www.inaturalist.org/observations/140871860	2020/05/30 12:14	2020-05-30	2020-05-30 09:14:00 UTC	Kyiv	100	open	false			2022-11-02 12:53:23 UTC	2023-01-24 07:14:06 UTC	research	CC-BY-NC
Natrix natrix	2022-07-25 08:11:00 +0300	61.188	26.9024	grass snake	https://www.inaturalist.org/observations/140851680	2022/07/25 8:11 AM	2022-07-25	2022-07-25 05:11:00 UTC	Helsinki	5185	open	false			2022-11-02 06:14:39 UTC	2022-11-07 11:26:44 UTC	research	CC-BY-NC
Natrix natrix	2022-10-02 13:47:40 +0300	61.1835	26.8411	grass snake	https://www.inaturalist.org/observations/140800420	2022-10-02 13:47:40+03:00	2022-10-02	2022-10-02 10:47:40 UTC	Helsinki	3	open	false			2022-11-01 18:39:10 UTC	2022-11-07 11:26:57 UTC	research
Natrix natrix	2022-10-02 15:30:42 +0200	48.7657	9.48344	grass snake	https://www.inaturalist.org/observations/140701444	2022-10-02 15:30:42	2022-10-02	2022-10-02 13:30:42 UTC	Berlin	#N/A	open	false	gps	gps	2022-10-31 21:18:03 UTC	2022-11-07 21:06:19 UTC	research	CC-BY-NC
Natrix natrix	2022-10-31 15:48:59 +0100	46.1425	13.4934	grass snake	https://www.inaturalist.org/observations/140675566	2022-10-31 15:48:59	2022-10-31	2022-10-31 14:48:59 UTC	Rome	2365	open	true			2022-10-31 17:18:17 UTC	2022-11-02 19:01:04 UTC	needs_id	CC-BY
Natrix natrix	2022-10-31 15:04:21 +0100	40.9738	19.4807	grass snake	https://www.inaturalist.org/observations/140664065	2022-10-31 15:04:21	2022-10-31	2022-10-31 14:04:21 UTC	Europe/Tirane	#N/A	open	false	gps	gps	2022-10-31 15:29:10 UTC	2022-12-02 10:00:21 UTC	research	CC-BY-NC
Natrix natrix	2022-10-31 10:38:08 +0100	54.4127	9.91364	grass snake	https://www.inaturalist.org/observations/140634710	2022-10-31 10:38:08+01:00	2022-10-31	2022-10-31 09:38:08 UTC	Berlin	96	open	false			2022-10-31 09:39:03 UTC	2022-11-03 18:32:38 UTC	research	CC-BY-NC
Natrix natrix	2001-06-20 10:33:00 +0200	52.5217	13.0883	grass snake	https://www.inaturalist.org/observations/140634364	2001/06/20 10:33	2001-06-20	2001-06-20 08:33:00 UTC	Berlin	175	open	false			2022-10-31 09:34:00 UTC	2022-11-08 08:28:12 UTC	research
Natrix natrix	2022-10-30 10:02:00 +0100	48.5651	14.8968	grass snake	https://www.inaturalist.org/observations/140544076	2022/10/30 10:02	2022-10-30	2022-10-30 09:02:00 UTC	Vienna	#N/A	open	false			2022-10-30 17:46:55 UTC	2022-10-31 12:09:31 UTC	research	CC-BY-NC
Natrix natrix	2018-08-01 09:47:02 +0300	50.5151	31.0015	grass snake	https://www.inaturalist.org/observations/140537713	2018-08-01 09:47:02	2018-08-01	2018-08-01 06:47:02 UTC	Kyiv	#N/A	open	false	gps	gps	2022-10-30 17:02:02 UTC	2022-10-30 17:17:14 UTC	research	CC-BY-NC
Natrix natrix	2018-05-09 14:42:05 +0300	50.5012	30.7466	grass snake	https://www.inaturalist.org/observations/140537499	2018-05-09 14:42:05	2018-05-09	2018-05-09 11:42:05 UTC	Kyiv	141	open	false	gps	gps	2022-10-30 17:00:35 UTC	2022-10-30 17:17:21 UTC	research	CC-BY-NC
Natrix natrix scutata	2021-09-25 12:56:00 +0300	40.1196	43.5796		https://www.inaturalist.org/observations/140513245	2021/09/25 12:56 PM	2021-09-25	2021-09-25 09:56:00 UTC	Istanbul	159	open	false			2022-10-30 13:49:07 UTC	2023-01-17 15:45:52 UTC	research	CC-BY-NC
Natrix natrix	2022-10-29 14:45:14 +0300	41.2487	23.207	grass snake	https://www.inaturalist.org/observations/140424668	2022-10-29 14:45:14	2022-10-29	2022-10-29 11:45:14 UTC	Athens	89	open	false	gps	gps	2022-10-29 20:38:51 UTC	2022-10-30 13:18:45 UTC	research	CC-BY-NC
Natrix natrix	2022-10-29 15:29:16 +0200	46.1903	12.9455	grass snake	https://www.inaturalist.org/observations/140373618	2022-10-29 15:29:16	2022-10-29	2022-10-29 13:29:16 UTC	Rome	4	open	false			2022-10-29 13:31:09 UTC	2022-11-04 21:13:39 UTC	research	CC-BY-NC
Natrix natrix	2009-07-24 12:56:00 +0200	52.7322	12.259	grass snake	https://www.inaturalist.org/observations/140299559	2009/07/24 12:56	2009-07-24	2009-07-24 10:56:00 UTC	Berlin	2514	open	false			2022-10-28 21:07:02 UTC	2022-10-29 06:06:22 UTC	research	CC-BY-NC
Natrix natrix	2022-05-08 17:30:48 +0200	45.2515	17.7574	grass snake	https://www.inaturalist.org/observations/140287573	2022-05-08 17:30:48+02:00	2022-05-08	2022-05-08 15:30:48 UTC	Zagreb	16	open	false			2022-10-28 18:59:27 UTC	2023-02-11 20:23:47 UTC	research
Natrix natrix	2022-07-30 12:54:00 +0200	52.5783	17.1823	grass snake	https://www.inaturalist.org/observations/140271709	2022/07/30 12:54 PM	2022-07-30	2022-07-30 10:54:00 UTC	Warsaw	4	open	true			2022-10-28 16:32:27 UTC	2022-10-29 06:06:34 UTC	research	CC-BY-NC
Natrix natrix	2022-10-08 11:09:00 +0300	54.8486	25.5036	grass snake	https://www.inaturalist.org/observations/140269299	2022/10/08 11:09 AM	2022-10-08	2022-10-08 08:09:00 UTC	Vilnius	4	open	false			2022-10-28 16:07:25 UTC	2022-10-31 12:10:32 UTC	research	CC-BY-NC
Natrix natrix	2022-09-24 12:47:00 +0300	54.3257	23.9634	grass snake	https://www.inaturalist.org/observations/140235084	2022/09/24 12:47 PM	2022-09-24	2022-09-24 09:47:00 UTC	Vilnius	15	open	false			2022-10-28 08:28:21 UTC	2022-10-31 12:10:42 UTC	research	CC-BY-NC
Natrix natrix	2022-08-12 13:09:05 +0200	58.8813	9.61092	grass snake	https://www.inaturalist.org/observations/140208001	2022-08-12 13:09:05+02:00	2022-08-12	2022-08-12 11:09:05 UTC	Europe/Oslo	6	open	false			2022-10-28 00:53:17 UTC	2022-10-28 05:06:25 UTC	research	CC-BY-NC
Natrix natrix	2022-10-07 12:54:24 +0300	46.7355	23.5339	grass snake	https://www.inaturalist.org/observations/140163372	2022-10-07 12:54:24	2022-10-07	2022-10-07 09:54:24 UTC	Bucharest	#N/A	open	false	gps	gps	2022-10-27 16:14:20 UTC	2022-10-28 05:06:30 UTC	research	CC-BY-NC
Natrix natrix	2022-10-27 15:54:16 +0300	50.5589	30.2406	grass snake	https://www.inaturalist.org/observations/140154438	2022-10-27 15:54:16+03:00	2022-10-27	2022-10-27 12:54:16 UTC	Kyiv	13	open	false			2022-10-27 14:27:22 UTC	2022-10-28 05:06:37 UTC	research	CC-BY-NC
Natrix natrix	2016-10-23 14:37:00 +0300	40.7584	21.1445	grass snake	https://www.inaturalist.org/observations/140127952	2016/10/23 2:37 PM	2016-10-23	2016-10-23 11:37:00 UTC	Athens	10065	open	false			2022-10-27 05:07:17 UTC	2022-10-27 08:29:04 UTC	research
Natrix natrix	2016-04-19 13:33:00 +0300	38.1118	21.7043	grass snake	https://www.inaturalist.org/observations/140127705	2016/04/19 1:33 PM	2016-04-19	2016-04-19 10:33:00 UTC	Athens	19082	open	false			2022-10-27 05:00:57 UTC	2022-10-28 19:02:16 UTC	research
Natrix natrix	2014-05-03 12:37:00 +0300	40.636	22.9804	grass snake	https://www.inaturalist.org/observations/140127704	2014/05/03 12:37 PM	2014-05-03	2014-05-03 09:37:00 UTC	Athens	1731	open	false			2022-10-27 05:00:57 UTC	2022-11-07 14:32:33 UTC	research
Natrix natrix	2015-05-02 15:49:00 +0300	41.0388	25.2288	grass snake	https://www.inaturalist.org/observations/140127703	2015/05/02 3:49 PM	2015-05-02	2015-05-02 12:49:00 UTC	Athens	13033	open	false			2022-10-27 05:00:56 UTC	2022-10-27 08:31:00 UTC	research
Natrix natrix	2015-07-12 21:59:00 +0300	36.1686	27.8532	grass snake	https://www.inaturalist.org/observations/140127702	2015/07/12 9:59 PM	2015-07-12	2015-07-12 18:59:00 UTC	Athens	673	open	false			2022-10-27 05:00:56 UTC	2022-10-27 10:17:29 UTC	research
Natrix natrix	2018-07-05 21:42:00 +0300	38.91	21.7992	grass snake	https://www.inaturalist.org/observations/140127701	2018/07/05 9:42 PM	2018-07-05	2018-07-05 18:42:00 UTC	Athens	4809	open	false			2022-10-27 05:00:56 UTC	2022-10-31 12:10:56 UTC	research
Natrix natrix	2019-06-02 11:56:56 +0200	48.3173	15.2039	grass snake	https://www.inaturalist.org/observations/140100383	2019-06-02 11:56:56	2019-06-02	2019-06-02 09:56:56 UTC	Vienna	1442	open	false	gps	gps	2022-10-26 22:01:30 UTC	2022-10-27 18:46:49 UTC	research	CC-BY-NC
Natrix natrix	2022-10-26 16:12:13 +0300	37.7947	26.7075	grass snake	https://www.inaturalist.org/observations/140062787	2022-10-26 16:12:13	2022-10-26	2022-10-26 13:12:13 UTC	Athens	2606	open	false	gps	gps	2022-10-26 14:59:58 UTC	2022-10-26 15:01:13 UTC	needs_id	CC-BY-NC
Natrix natrix	2022-10-26 14:42:29 +0200	46.6543	14.2613	grass snake	https://www.inaturalist.org/observations/140052676	2022-10-26 14:42:29	2022-10-26	2022-10-26 12:42:29 UTC	Vienna	1799	open	false			2022-10-26 12:43:04 UTC	2022-10-27 05:14:00 UTC	research
Natrix natrix	2022-10-26 14:39:18 +0300	46.3422	27.7708	grass snake	https://www.inaturalist.org/observations/140052084	Wed Oct 26 2022 14:39:18 GMT+0300 (GMT+3)	2022-10-26	2022-10-26 11:39:18 UTC	Bucharest	#N/A	open	false			2022-10-26 12:34:08 UTC	2022-10-27 05:14:13 UTC	research
Natrix natrix	2022-05-23 07:46:00 +0300	45.3878	29.566	grass snake	https://www.inaturalist.org/observations/139951094	2022/05/23 07:46	2022-05-23	2022-05-23 04:46:00 UTC	Bucharest	50	open	false			2022-10-25 10:46:05 UTC	2022-10-27 00:07:56 UTC	research	CC-BY-NC
Natrix natrix	2022-06-29 13:59:00 +0300	52.3268	35.3452	grass snake	https://www.inaturalist.org/observations/139942836	2022/06/29 13:59	2022-06-29	2022-06-29 10:59:00 UTC	St. Petersburg	4	open	false			2022-10-25 07:02:07 UTC	2022-10-27 00:08:08 UTC	research	CC-BY-NC
Natrix natrix	2022-09-11 08:55:55 +0200	47.1971	18.9543	grass snake	https://www.inaturalist.org/observations/139921494	2022-09-11 08:55:55	2022-09-11	2022-09-11 06:55:55 UTC	Budapest	242	open	false	gps	gps	2022-10-25 00:28:41 UTC	2022-10-27 00:08:18 UTC	research	CC-BY
Natrix natrix	2022-10-09 16:46:57 +0300	49.5043	23.9875	grass snake	https://www.inaturalist.org/observations/139905596	2022-10-09 16:46:57+03:00	2022-10-09	2022-10-09 13:46:57 UTC	Kyiv	1904	open	false			2022-10-24 21:09:21 UTC	2022-10-27 00:08:25 UTC	research	CC-BY-NC
Natrix natrix	2022-10-24 17:21:53 +0200	56.0619	12.5561	grass snake	https://www.inaturalist.org/observations/139874447	2022-10-24 17:21:53+02:00	2022-10-24	2022-10-24 15:21:53 UTC	Copenhagen	3	open	false			2022-10-24 15:22:11 UTC	2022-12-30 20:20:18 UTC	research	CC-BY-NC
Natrix natrix	2022-10-24 14:55:17 +0200	55.1178	11.8048	grass snake	https://www.inaturalist.org/observations/139863574	2022-10-24 14:55:17+02:00	2022-10-24	2022-10-24 12:55:17 UTC	Copenhagen	16	open	false			2022-10-24 13:02:26 UTC	2022-12-30 20:20:24 UTC	research
Natrix natrix	2022-10-24 12:46:47 +0200	46.8883	15.8936	grass snake	https://www.inaturalist.org/observations/139855576	2022-10-24 12:46:47	2022-10-24	2022-10-24 10:46:47 UTC	Vienna	25457	open	false			2022-10-24 10:50:05 UTC	2022-11-18 11:42:07 UTC	research	CC-BY-NC
Natrix natrix	2022-07-11 12:10:00 +0300	50.4135	41.0574	grass snake	https://www.inaturalist.org/observations/139847799	2022/07/11 12:10	2022-07-11	2022-07-11 09:10:00 UTC	St. Petersburg	4	open	false			2022-10-24 08:00:13 UTC	2022-10-31 12:11:09 UTC	research	CC-BY-NC
Natrix natrix	2022-09-30 12:05:25 +0200	55.0341	20.6538	grass snake	https://www.inaturalist.org/observations/139722493	2022-09-30 12:05:25	2022-09-30	2022-09-30 10:05:25 UTC	Kaliningrad	#N/A	open	false	gps	gps	2022-10-23 08:07:08 UTC	2022-10-24 05:03:52 UTC	research	CC-BY-NC
Natrix natrix	2022-09-08 13:40:10 +0300	55.5694	38.8234	grass snake	https://www.inaturalist.org/observations/139714743	2022-09-08 13:40:10+03:00	2022-09-08	2022-09-08 10:40:10 UTC	St. Petersburg	409	open	false			2022-10-23 05:26:22 UTC	2022-10-24 10:16:06 UTC	research	CC-BY-NC
Natrix natrix	2022-10-22 08:59:10 +0200	44.5036	15.2541	grass snake	https://www.inaturalist.org/observations/139672626	2022-10-22 08:59:10	2022-10-22	2022-10-22 06:59:10 UTC	Zagreb	5	open	false	gps	gps	2022-10-22 20:58:34 UTC	2023-02-11 20:28:51 UTC	research
Natrix natrix	2010-08-10 12:40:00 +0200	44.6554	21.7951	grass snake	https://www.inaturalist.org/observations/139648014	2010-08-10 12:40:00	2010-08-10	2010-08-10 10:40:00 UTC	Belgrade	434	open	false			2022-10-22 17:22:14 UTC	2023-02-13 18:39:06 UTC	research	CC-BY
Natrix natrix	2018-04-11 16:24:00 +0300	51.4723	25.765	grass snake	https://www.inaturalist.org/observations/139607633	2018/04/11 16:24	2018-04-11	2018-04-11 13:24:00 UTC	Kyiv	#N/A	open	false			2022-10-22 09:37:36 UTC	2022-10-24 05:04:04 UTC	research	CC-BY-NC
Natrix natrix	2022-10-20 14:24:00 +0200	52.8305	12.1083	grass snake	https://www.inaturalist.org/observations/139515894	2022/10/20 14:24	2022-10-20	2022-10-20 12:24:00 UTC	Berlin	4	open	false			2022-10-21 12:21:35 UTC	2022-10-24 05:04:12 UTC	research	CC-BY-NC-SA
Natrix natrix	2022-10-13 10:54:00 +0200	49.5796	20.6189	grass snake	https://www.inaturalist.org/observations/139507049	2022/10/13 10:54	2022-10-13	2022-10-13 08:54:00 UTC	Warsaw	2	open	false			2022-10-21 08:55:01 UTC	2022-10-24 05:04:25 UTC	research	CC-BY-NC
Natrix natrix	1992-04-16 17:01:00 +0300	45.9385	34.2245	grass snake	https://www.inaturalist.org/observations/139443323	1992/04/16 5:01 PM	1992-04-16	1992-04-16 14:01:00 UTC	Europe/Simferopol	2037	open	false			2022-10-20 17:04:31 UTC	2022-10-23 14:11:57 UTC	research	CC-BY-NC
Natrix natrix	2022-10-09 13:04:00 +0300	54.1928	37.7022	grass snake	https://www.inaturalist.org/observations/139443294	2022/10/09 13:04	2022-10-09	2022-10-09 10:04:00 UTC	St. Petersburg	122	open	false			2022-10-20 17:04:20 UTC	2022-11-04 16:03:19 UTC	research	CC-BY-NC
Natrix natrix	2022-10-15 15:28:00 +0300	54.7969	25.3042	grass snake	https://www.inaturalist.org/observations/139440905	2022/10/15 3:28 PM	2022-10-15	2022-10-15 12:28:00 UTC	Vilnius	61	open	false			2022-10-20 16:39:48 UTC	2022-10-31 12:12:29 UTC	research	CC-BY-NC
Natrix natrix	2022-10-20 14:11:01 +0200	56.1985	9.6615	grass snake	https://www.inaturalist.org/observations/139435503	2022-10-20 14:11:01+02:00	2022-10-20	2022-10-20 12:11:01 UTC	Copenhagen	2060	open	false			2022-10-20 15:38:15 UTC	2022-12-30 20:21:18 UTC	research
Natrix natrix	2022-10-20 00:00:00 +0100	52.9037	23.8718	grass snake	https://www.inaturalist.org/observations/139426857	2022-10-20	2022-10-20		Warsaw	432	open	false	gps	gps	2022-10-20 13:58:45 UTC	2022-10-28 12:50:45 UTC	research	CC-BY-NC
Natrix natrix	2022-10-06 15:49:16 +0300	51.6677	34.8891	grass snake	https://www.inaturalist.org/observations/139412202	2022-10-06 15:49:16	2022-10-06	2022-10-06 12:49:16 UTC	St. Petersburg	#N/A	open	false	gps	gps	2022-10-20 09:56:46 UTC	2022-10-23 14:12:40 UTC	research	CC-BY-NC
Natrix natrix	2022-10-16 13:43:01 +0200	54.3112	9.5203	grass snake	https://www.inaturalist.org/observations/139372370	2022-10-16 13:43:01	2022-10-16	2022-10-16 11:43:01 UTC	Berlin	6863	open	true	gps	gps	2022-10-19 21:56:59 UTC	2022-10-31 12:12:37 UTC	research	CC-BY-NC
Natrix natrix	2022-09-30 13:20:00 +0200	48.6055	20.7479	grass snake	https://www.inaturalist.org/observations/139366621	2022/09/30 1:20 PM	2022-09-30	2022-09-30 11:20:00 UTC	Bratislava	#N/A	open	false			2022-10-19 20:50:57 UTC	2022-10-23 14:13:47 UTC	research	CC-BY-NC
Natrix natrix	2022-10-15 13:12:00 +0200	53.0383	13.9516	grass snake	https://www.inaturalist.org/observations/139359094	2022/10/15 13:12	2022-10-15	2022-10-15 11:12:00 UTC	Berlin	8	open	false			2022-10-19 19:32:04 UTC	2022-10-31 12:12:49 UTC	research	CC-BY
Natrix natrix	2022-10-19 12:19:00 +0300	44.6818	34.3728	grass snake	https://www.inaturalist.org/observations/139348626	2022/10/19 12:19	2022-10-19	2022-10-19 09:19:00 UTC	Europe/Simferopol	31	open	false			2022-10-19 17:38:24 UTC	2022-10-23 14:14:11 UTC	research	CC-BY-NC
Natrix natrix	2022-10-19 15:25:26 +0300	42.5795	27.4276	grass snake	https://www.inaturalist.org/observations/139344290	2022-10-19 15:25:26	2022-10-19	2022-10-19 12:25:26 UTC	Sofia	4	open	false			2022-10-19 16:54:22 UTC	2023-01-24 07:14:04 UTC	research
Natrix natrix	2022-10-16 17:10:00 +0200	51.2215	17.5122	grass snake	https://www.inaturalist.org/observations/139321363	2022/10/16 17:10	2022-10-16	2022-10-16 15:10:00 UTC	Warsaw	#N/A	open	false			2022-10-19 12:13:08 UTC	2022-10-19 12:13:52 UTC	research	CC-BY-NC
Natrix natrix	2022-10-18 15:34:37 +0200	50.0832	14.3341	grass snake	https://www.inaturalist.org/observations/139306213	2022-10-18 15:34:37	2022-10-18	2022-10-18 13:34:37 UTC	Prague	#N/A	open	false	gps	gps	2022-10-19 06:25:32 UTC	2022-10-20 05:19:05 UTC	research
Natrix natrix	2022-10-15 11:10:00 +0300	53.676	33.6224	grass snake	https://www.inaturalist.org/observations/139262969	2022/10/15 11:10	2022-10-15	2022-10-15 08:10:00 UTC	St. Petersburg	244	open	false			2022-10-18 20:13:21 UTC	2022-10-31 12:12:57 UTC	research	CC-BY-NC
Natrix natrix	2022-05-22 15:34:44 +0200	57.6684	11.9485	grass snake	https://www.inaturalist.org/observations/139226220	2022-05-22 15:34:44+02:00	2022-05-22	2022-05-22 13:34:44 UTC	Stockholm	23	open	false			2022-10-18 13:59:06 UTC	2022-10-20 13:27:04 UTC	research
Natrix natrix	2022-10-18 15:31:25 +0300	49.9365	36.4888	grass snake	https://www.inaturalist.org/observations/139221439	2022-10-18 15:31:25	2022-10-18	2022-10-18 12:31:25 UTC	Kyiv	#N/A	open	false	gps	gps	2022-10-18 12:55:17 UTC	2022-10-19 07:45:28 UTC	research	CC-BY-NC
Natrix natrix	2019-06-22 15:26:00 +0300	55.6197	43.7298	grass snake	https://www.inaturalist.org/observations/139217647	2019/06/22 15:26	2019-06-22	2019-06-22 12:26:00 UTC	St. Petersburg	#N/A	open	false			2022-10-18 11:59:13 UTC	2022-10-31 12:13:05 UTC	research	CC-BY-NC
Natrix natrix	1992-04-15 17:01:00 +0300	46.0085	34.2192	grass snake	https://www.inaturalist.org/observations/139145001	1992/04/15 5:01 PM	1992-04-15	1992-04-15 14:01:00 UTC	Europe/Simferopol	2941	open	false			2022-10-17 18:49:38 UTC	2022-10-19 07:45:57 UTC	research	CC-BY-NC
Natrix natrix	2017-04-05 00:00:00 +0100	52.2052	21.1251	grass snake	https://www.inaturalist.org/observations/139107805	2017/04/05	2017-04-05		Warsaw	#N/A	open	false			2022-10-17 12:38:59 UTC	2022-10-17 12:39:19 UTC	casual	CC-BY-NC
Natrix natrix	2012-03-25 00:00:00 +0100	52.2295	21.1263	grass snake	https://www.inaturalist.org/observations/139107705	2012/03/25	2012-03-25		Warsaw	#N/A	open	false			2022-10-17 12:37:14 UTC	2022-10-17 12:37:31 UTC	casual	CC-BY-NC
Natrix natrix	2011-09-11 00:00:00 +0100	52.2322	21.1262	grass snake	https://www.inaturalist.org/observations/139107525	2011/09/11	2011-09-11		Warsaw	#N/A	open	false			2022-10-17 12:34:48 UTC	2022-10-17 12:35:10 UTC	casual	CC-BY-NC
Natrix natrix	2011-09-11 00:00:00 +0100	52.2322	21.1229	grass snake	https://www.inaturalist.org/observations/139107386	2011/09/11	2011-09-11		Warsaw	#N/A	open	false			2022-10-17 12:32:35 UTC	2022-10-17 12:32:54 UTC	casual	CC-BY-NC
Natrix natrix	2011-06-29 00:00:00 +0100	52.2266	21.1144	grass snake	https://www.inaturalist.org/observations/139107253	2011/06/29	2011-06-29		Warsaw	#N/A	open	false			2022-10-17 12:30:42 UTC	2022-10-17 12:33:04 UTC	casual	CC-BY-NC
Natrix natrix		53.3303	34.4799	grass snake	https://www.inaturalist.org/observations/139104886				St. Petersburg	1401	open	false	gps	gps	2022-10-17 11:53:21 UTC	2022-11-30 12:32:13 UTC	casual	CC-BY-NC
Natrix natrix	2022-08-01 11:20:00 +0200	47.1776	16.2081	grass snake	https://www.inaturalist.org/observations/139085152	2022-08-01 11:20:00	2022-08-01	2022-08-01 09:20:00 UTC	Vienna	21	open	false	gps	gps	2022-10-17 05:39:57 UTC	2023-02-13 18:19:57 UTC	research	CC-BY
Natrix natrix	2022-04-17 12:34:53 +0200	47.1776	16.2081	grass snake	https://www.inaturalist.org/observations/139084906	2022-04-17 12:34:53	2022-04-17	2022-04-17 10:34:53 UTC	Vienna	17	open	false	gps	gps	2022-10-17 05:35:40 UTC	2023-02-13 18:19:57 UTC	research	CC-BY
Natrix natrix	2022-10-08 13:51:00 +0300	56.1591	40.6655	grass snake	https://www.inaturalist.org/observations/139016047	2022/10/08 13:51	2022-10-08	2022-10-08 10:51:00 UTC	St. Petersburg	1824	open	false			2022-10-16 19:24:33 UTC	2022-10-19 07:46:15 UTC	research	CC-BY-NC
Natrix natrix	2022-10-14 12:39:00 +0300	54.8093	37.5998	grass snake	https://www.inaturalist.org/observations/139007041	2022/10/14 12:39	2022-10-14	2022-10-14 09:39:00 UTC	St. Petersburg	15	open	false			2022-10-16 18:25:53 UTC	2022-10-31 12:13:08 UTC	research	CC-BY-NC
Natrix natrix	2022-10-16 16:23:51 +0200	49.6719	8.91555	grass snake	https://www.inaturalist.org/observations/139006179	2022-10-16 16:23:51+02:00	2022-10-16	2022-10-16 14:23:51 UTC	Berlin	299	open	false			2022-10-16 18:19:51 UTC	2022-10-19 07:46:31 UTC	research	CC-BY-NC
Natrix natrix	2022-10-16 16:14:00 +0200	47.9044	13.0968	grass snake	https://www.inaturalist.org/observations/138998969	2022-10-16 16:14:00+02:00	2022-10-16	2022-10-16 14:14:00 UTC	Vienna	48	open	false			2022-10-16 17:30:45 UTC	2022-11-09 03:00:48 UTC	research
Natrix natrix	2018-04-11 16:24:00 +0300	51.4722	25.7648	grass snake	https://www.inaturalist.org/observations/138978057	2018/04/11 16:24	2018-04-11	2018-04-11 13:24:00 UTC	Kyiv	#N/A	open	false			2022-10-16 15:04:49 UTC	2022-10-22 20:22:23 UTC	research	CC-BY-NC
Natrix natrix	2022-10-16 16:19:33 +0200	53.9737	10.8796	grass snake	https://www.inaturalist.org/observations/138977532	2022-10-16 16:19:33+02:00	2022-10-16	2022-10-16 14:19:33 UTC	Berlin	161	open	false			2022-10-16 15:00:39 UTC	2022-10-17 05:08:39 UTC	research	CC-BY-NC
Natrix natrix	2022-10-09 16:10:26 +0200	52.7843	21.3855	grass snake	https://www.inaturalist.org/observations/138972335	2022-10-09 16:10:26	2022-10-09	2022-10-09 14:10:26 UTC	Warsaw	#N/A	open	false	gps	gps	2022-10-16 14:20:13 UTC	2022-10-16 17:00:39 UTC	research
Natrix natrix	2022-10-16 14:02:38 +0200	48.4023	16.4907	grass snake	https://www.inaturalist.org/observations/138958997	Sun Oct 16 2022 14:02:38 GMT +0200 (GMT+2)	2022-10-16	2022-10-16 12:02:38 UTC	Vienna	545	open	false			2022-10-16 12:12:10 UTC	2022-11-03 12:31:44 UTC	research	CC-BY-NC
Natrix natrix	2022-10-16 12:32:26 +0300	54.5003	23.9404	grass snake	https://www.inaturalist.org/observations/138949372	2022-10-16 12:32:26	2022-10-16	2022-10-16 09:32:26 UTC	Vilnius	#N/A	open	false	gps	gps	2022-10-16 09:50:05 UTC	2022-10-17 05:08:42 UTC	research	CC0
Natrix natrix	2020-08-10 14:22:00 +0300	44.0541	39.1295	grass snake	https://www.inaturalist.org/observations/138948335	2020/08/10 14:22	2020-08-10	2020-08-10 11:22:00 UTC	St. Petersburg	39	open	false			2022-10-16 09:33:29 UTC	2022-10-18 11:03:55 UTC	research	CC-BY-NC
Natrix natrix	2022-10-15 13:08:00 +0200	43.5802	16.2373	grass snake	https://www.inaturalist.org/observations/138939341	2022/10/15 1:08 PM	2022-10-15	2022-10-15 11:08:00 UTC	Zagreb	4	open	false			2022-10-16 06:53:07 UTC	2023-02-11 20:23:56 UTC	research	CC-BY-NC
Natrix natrix	2022-10-06 17:56:02 +0300	55.5177	21.4431	grass snake	https://www.inaturalist.org/observations/138878078	2022-10-06 17:56:02	2022-10-06	2022-10-06 14:56:02 UTC	Vilnius	#N/A	open	false	gps	gps	2022-10-15 19:16:01 UTC	2022-10-15 19:33:51 UTC	research
Natrix natrix	2022-10-15 10:07:58 +0200	48.0661	20.7355	grass snake	https://www.inaturalist.org/observations/138873757	2022-10-15 10:07:58	2022-10-15	2022-10-15 08:07:58 UTC	Budapest	#N/A	open	false	gps	gps	2022-10-15 18:43:36 UTC	2022-10-15 18:50:05 UTC	research	CC-BY
Natrix natrix	2022-10-15 00:00:00 +0100	47.3363	21.083	grass snake	https://www.inaturalist.org/observations/138848268	2022-10-15	2022-10-15		Budapest	181	open	false	gps	gps	2022-10-15 15:19:51 UTC	2022-10-15 15:32:00 UTC	research	CC-BY-NC
Natrix natrix	2022-10-15 15:22:08 +0200	54.8255	9.29003	grass snake	https://www.inaturalist.org/observations/138841341	2022-10-15 15:22:08	2022-10-15	2022-10-15 13:22:08 UTC	Copenhagen	6	open	false	gps	gps	2022-10-15 14:25:37 UTC	2022-12-30 20:22:49 UTC	research	CC-BY-NC
Natrix natrix	2022-10-15 09:38:55 +0300	55.8244	21.0713	grass snake	https://www.inaturalist.org/observations/138830170	2022-10-15 09:38:55	2022-10-15	2022-10-15 06:38:55 UTC	Vilnius	#N/A	open	false	gps	gps	2022-10-15 13:20:07 UTC	2022-10-17 18:01:38 UTC	research
Natrix natrix	2022-10-15 13:44:00 +0300	55.2329	26.0406	grass snake	https://www.inaturalist.org/observations/138828097	2022/10/15 1:44 PM	2022-10-15	2022-10-15 10:44:00 UTC	Vilnius	244	open	false			2022-10-15 12:55:00 UTC	2022-12-20 20:15:37 UTC	research	CC-BY-NC
Natrix natrix	2022-10-15 11:54:00 +0300	48.5184	44.509	grass snake	https://www.inaturalist.org/observations/138821920	2022/10/15 11:54	2022-10-15	2022-10-15 08:54:00 UTC	Volgograd	2	open	false			2022-10-15 11:34:36 UTC	2022-10-17 20:21:25 UTC	research	CC-BY-NC
Natrix natrix	2022-08-12 13:05:15 +0200	58.8812	9.61057	grass snake	https://www.inaturalist.org/observations/138781993	2022-08-12 13:05:15+02:00	2022-08-12	2022-08-12 11:05:15 UTC	Europe/Oslo	9	open	false			2022-10-15 00:38:14 UTC	2022-10-17 20:21:48 UTC	research	CC-BY-NC
Natrix natrix	2013-05-17 00:00:00 +0100	59.2695	15.2698	grass snake	https://www.inaturalist.org/observations/138758448	2013-05-17	2013-05-17		Stockholm	234	open	false			2022-10-14 20:23:48 UTC	2023-02-20 22:39:13 UTC	research	CC-BY-NC
Natrix natrix	2022-10-08 15:26:00 +0300	49.9434	31.0969	grass snake	https://www.inaturalist.org/observations/138753049	2022/10/08 15:26	2022-10-08	2022-10-08 12:26:00 UTC	Kyiv	#N/A	open	false			2022-10-14 19:30:52 UTC	2022-10-17 20:22:08 UTC	research	CC-BY
Natrix natrix	2022-10-08 11:59:00 +0200	47.7473	18.738	grass snake	https://www.inaturalist.org/observations/138727136	2022/10/08 11:59 AM	2022-10-08	2022-10-08 09:59:00 UTC	Budapest	55	open	false			2022-10-14 15:32:14 UTC	2022-10-17 20:22:14 UTC	research	CC-BY-NC
Natrix natrix	2022-09-01 10:57:00 +0300	43.3539	28.0755	grass snake	https://www.inaturalist.org/observations/138727057	2022/09/01 10:57	2022-09-01	2022-09-01 07:57:00 UTC	Sofia	20	open	false			2022-10-14 15:31:43 UTC	2022-10-17 20:22:22 UTC	research	CC-BY-NC
Natrix natrix	2022-10-14 15:10:32 +0200	49.4736	15.6028	grass snake	https://www.inaturalist.org/observations/138714167	2022-10-14 15:10:32	2022-10-14	2022-10-14 13:10:32 UTC	Prague	#N/A	open	false	gps	gps	2022-10-14 13:28:03 UTC	2022-10-17 20:22:43 UTC	research
Natrix natrix	2022-10-14 15:10:34 +0200	49.4736	15.6028	grass snake	https://www.inaturalist.org/observations/138714005	2022-10-14 15:10:34	2022-10-14	2022-10-14 13:10:34 UTC	Prague	#N/A	open	false	gps	gps	2022-10-14 13:26:50 UTC	2022-10-31 12:13:20 UTC	research
Natrix natrix	2022-10-14 13:17:54 +0200	46.2551	20.189	grass snake	https://www.inaturalist.org/observations/138705070	2022-10-14 13:17:54	2022-10-14	2022-10-14 11:17:54 UTC	Budapest	#N/A	open	false	gps	gps	2022-10-14 11:25:46 UTC	2022-10-14 12:55:47 UTC	research
Natrix natrix	2022-10-10 13:32:00 +0200	52.5695	9.79588	grass snake	https://www.inaturalist.org/observations/138599309	2022/10/10 1:32 PM	2022-10-10	2022-10-10 11:32:00 UTC	Berlin	396	open	false			2022-10-13 11:35:33 UTC	2022-10-14 16:28:05 UTC	research
Natrix natrix	2022-10-08 14:06:53 +0300	55.1091	25.1964	grass snake	https://www.inaturalist.org/observations/138524372	2022-10-08 14:06:53	2022-10-08	2022-10-08 11:06:53 UTC	Vilnius	#N/A	open	false	gps	gps	2022-10-12 17:39:44 UTC	2022-10-13 05:12:25 UTC	research
Natrix natrix	2022-10-12 12:37:53 +0300	50.2023	32.0932	grass snake	https://www.inaturalist.org/observations/138497148	2022-10-12 12:37:53+03:00	2022-10-12	2022-10-12 09:37:53 UTC	Kyiv	22	open	false			2022-10-12 13:38:16 UTC	2022-10-13 11:52:36 UTC	research
Natrix natrix	2022-10-12 12:42:56 +0300	55.2909	37.4732	grass snake	https://www.inaturalist.org/observations/138487455	2022-10-12 12:42:56+03:00	2022-10-12	2022-10-12 09:42:56 UTC	St. Petersburg	7	open	false			2022-10-12 11:37:11 UTC	2022-10-13 05:12:32 UTC	research
Natrix natrix	2022-10-09 00:00:00 +0200	42.317	27.765	grass snake	https://www.inaturalist.org/observations/138480290	2022-10-09	2022-10-09		Sofia	5863	open	false	gps	gps	2022-10-12 09:36:31 UTC	2022-10-17 12:28:00 UTC	research	CC-BY-NC
Natrix natrix	2022-10-10 11:33:00 +0200	55.5665	11.5798	grass snake	https://www.inaturalist.org/observations/138463135	2022-10-10 11:33:00+02:00	2022-10-10	2022-10-10 09:33:00 UTC	Copenhagen	26	open	false			2022-10-12 03:28:48 UTC	2022-12-30 20:23:16 UTC	research	CC-BY-NC
Natrix natrix	2022-10-11 23:53:26 +0200	51.6551	9.11877	grass snake	https://www.inaturalist.org/observations/138435991	Tue Oct 11 2022 23:53:26 GMT+0200 (GMT+2)	2022-10-11	2022-10-11 21:53:26 UTC	Berlin	30	open	false			2022-10-11 21:54:17 UTC	2022-11-15 09:20:13 UTC	research	CC-BY-NC
Natrix natrix	2022-06-15 09:09:00 +0200	58.9017	9.37877	grass snake	https://www.inaturalist.org/observations/138424940	2022/06/15 09:09	2022-06-15	2022-06-15 07:09:00 UTC	Europe/Oslo	#N/A	open	false			2022-10-11 20:14:13 UTC	2022-10-14 14:45:29 UTC	research
Natrix natrix	2020-07-30 12:35:59 +0300	46.1508	26.5692	grass snake	https://www.inaturalist.org/observations/138424144	2020-07-30 12:35:59	2020-07-30	2020-07-30 09:35:59 UTC	Bucharest	14	open	false	gps	gps	2022-10-11 20:06:41 UTC	2022-10-12 05:16:14 UTC	research
Natrix natrix	2014-06-25 15:02:00 +0300	51.5719	23.901	grass snake	https://www.inaturalist.org/observations/138423085	2014/06/25 15:02	2014-06-25	2014-06-25 12:02:00 UTC	Kyiv	1	open	false			2022-10-11 19:55:55 UTC	2022-10-22 20:22:23 UTC	research	CC-BY-NC
Natrix natrix	2022-10-09 15:13:00 +0300	55.6518	37.4586	grass snake	https://www.inaturalist.org/observations/138398643	2022/10/09 15:13	2022-10-09	2022-10-09 12:13:00 UTC	St. Petersburg	1	open	false			2022-10-11 16:15:05 UTC	2022-10-12 05:16:35 UTC	research	CC-BY-NC
Natrix natrix	2022-10-11 15:02:00 +0200	45.5132	12.2449	grass snake	https://www.inaturalist.org/observations/138387680	2022/10/11 15:02	2022-10-11	2022-10-11 13:02:00 UTC	Rome	1	open	false			2022-10-11 14:26:03 UTC	2022-10-13 21:45:00 UTC	research	CC-BY-NC
Natrix natrix	2022-06-11 17:04:00 +0200	49.5933	20.6307	grass snake	https://www.inaturalist.org/observations/138354872	2022/06/11 17:04	2022-06-11	2022-06-11 15:04:00 UTC	Warsaw	1	open	false			2022-10-11 05:05:40 UTC	2022-10-11 05:07:16 UTC	research	CC-BY-NC
Natrix natrix	2022-10-10 13:15:00 +0300	56.7463	36.7945	grass snake	https://www.inaturalist.org/observations/138309128	2022/10/10 13:15	2022-10-10	2022-10-10 10:15:00 UTC	St. Petersburg	31	open	false			2022-10-10 21:06:16 UTC	2022-10-11 05:07:21 UTC	research	CC-BY-NC
Natrix natrix	2022-10-10 00:00:00 +0100	55.23	9.39534	grass snake	https://www.inaturalist.org/observations/138307588	2022/10/10	2022-10-10		Copenhagen	12	open	false			2022-10-10 20:54:28 UTC	2022-12-30 20:23:24 UTC	research	CC-BY-NC
Natrix natrix	2022-10-08 16:48:00 +0300	51.6893	36.3046	grass snake	https://www.inaturalist.org/observations/138306233	2022/10/08 16:48	2022-10-08	2022-10-08 13:48:00 UTC	St. Petersburg	#N/A	open	false			2022-10-10 20:43:59 UTC	2022-10-20 13:33:57 UTC	research	CC-BY-NC
Natrix natrix	2022-10-10 22:30:56 +0300	55.2304	36.4449	grass snake	https://www.inaturalist.org/observations/138298593	2022-10-10 22:30:56+03:00	2022-10-10	2022-10-10 19:30:56 UTC	St. Petersburg	33	open	false			2022-10-10 19:49:44 UTC	2022-10-11 05:07:42 UTC	research
Natrix natrix	2016-09-01 11:59:00 +0300	49.0987	23.6322	grass snake	https://www.inaturalist.org/observations/138281596	2016/09/01 11:59	2016-09-01	2016-09-01 08:59:00 UTC	Kyiv	1	open	false			2022-10-10 17:43:04 UTC	2022-10-22 20:22:23 UTC	research	CC-BY-NC
Natrix natrix	2022-10-06 16:53:47 +0200	45.7966	14.1387	grass snake	https://www.inaturalist.org/observations/138257414	2022-10-06 16:53:47	2022-10-06	2022-10-06 14:53:47 UTC	Ljubljana	182	open	false	gps	gps	2022-10-10 14:26:43 UTC	2022-10-11 20:32:47 UTC	research
Natrix natrix	2022-07-06 13:46:00 +0100	51.6832	-4.76814	grass snake	https://www.inaturalist.org/observations/138252308	2022/07/06 1:46 PM	2022-07-06	2022-07-06 12:46:00 UTC	London	31	open	false			2022-10-10 13:37:38 UTC	2022-10-10 13:37:38 UTC	casual	CC-BY-NC
Natrix natrix	2022-10-10 14:45:29 +0300	41.4367	24.7437	grass snake	https://www.inaturalist.org/observations/138243477	Mon Oct 10 2022 14:45:29 GMT +0300 (GMT+3)	2022-10-10	2022-10-10 11:45:29 UTC	Sofia	43	open	false			2022-10-10 11:45:47 UTC	2022-10-13 10:27:10 UTC	research	CC-BY-NC
Natrix natrix	2022-10-09 11:36:00 +0200	49.5848	20.6307	grass snake	https://www.inaturalist.org/observations/138227625	2022/10/09 11:36	2022-10-09	2022-10-09 09:36:00 UTC	Warsaw	2	open	false			2022-10-10 06:37:55 UTC	2022-10-11 05:08:04 UTC	research	CC-BY-NC
Natrix natrix	2022-10-08 08:32:00 +0200	49.5793	20.618	grass snake	https://www.inaturalist.org/observations/138227407	2022/10/08 08:32	2022-10-08	2022-10-08 06:32:00 UTC	Warsaw	2	open	false			2022-10-10 06:33:37 UTC	2022-10-10 07:42:51 UTC	research	CC-BY-NC
Natrix natrix	2022-10-08 12:27:00 +0200	49.6323	20.3929	grass snake	https://www.inaturalist.org/observations/138227141	2022/10/08 12:27	2022-10-08	2022-10-08 10:27:00 UTC	Warsaw	2	open	false			2022-10-10 06:28:51 UTC	2022-10-10 07:42:58 UTC	research	CC-BY-NC
Natrix natrix	2022-10-10 08:26:52 +0200	55.5097	11.5036	grass snake	https://www.inaturalist.org/observations/138227137	2022-10-10 08:26:52	2022-10-10	2022-10-10 06:26:52 UTC	Copenhagen	196	open	false	gps	gps	2022-10-10 06:28:50 UTC	2022-10-10 06:28:50 UTC	casual
Natrix natrix	2022-10-09 12:59:00 +0300	55.9019	43.71	grass snake	https://www.inaturalist.org/observations/138118295	2022/10/09 12:59	2022-10-09	2022-10-09 09:59:00 UTC	St. Petersburg	15	open	false			2022-10-09 14:27:11 UTC	2022-12-06 19:34:51 UTC	research	CC-BY-NC
Natrix natrix	2022-10-09 08:55:00 +0200	53.074	16.4453	grass snake	https://www.inaturalist.org/observations/138116877	2022-10-09 08:55:00	2022-10-09	2022-10-09 06:55:00 UTC	Warsaw	1589	open	false	gps	gps	2022-10-09 14:15:35 UTC	2022-10-10 02:25:14 UTC	research	CC-BY-NC
Natrix natrix	2022-10-09 16:08:54 +0300	55.7416	21.1023	grass snake	https://www.inaturalist.org/observations/138109712	2022-10-09 16:08:54	2022-10-09	2022-10-09 13:08:54 UTC	Vilnius	9	open	false	gps	gps	2022-10-09 13:11:10 UTC	2022-10-10 06:43:19 UTC	research	CC-BY
Natrix natrix	2022-09-24 17:06:00 +0300	50.5204	30.529	grass snake	https://www.inaturalist.org/observations/138107387	2022/09/24 17:06	2022-09-24	2022-09-24 14:06:00 UTC	Kyiv	30	open	false			2022-10-09 12:47:51 UTC	2022-10-13 11:58:28 UTC	research	CC-BY-NC
Natrix natrix	2022-10-09 15:29:56 +0300	55.7352	21.1077	grass snake	https://www.inaturalist.org/observations/138105719	2022-10-09 15:29:56	2022-10-09	2022-10-09 12:29:56 UTC	Vilnius	8	open	false	gps	gps	2022-10-09 12:31:01 UTC	2022-10-10 06:42:55 UTC	research	CC-BY
Natrix natrix	2022-10-08 15:13:00 +0300	54.3565	44.1436	grass snake	https://www.inaturalist.org/observations/138095182	2022/10/08 15:13	2022-10-08	2022-10-08 12:13:00 UTC	St. Petersburg	#N/A	open	false			2022-10-09 10:09:03 UTC	2022-10-10 05:17:22 UTC	research	CC-BY-NC
Natrix natrix	2022-08-24 14:50:39 +0200	49.536	8.7872	grass snake	https://www.inaturalist.org/observations/138093049	2022-08-24 14:50:39+02:00	2022-08-24	2022-08-24 12:50:39 UTC	Berlin	4	open	false			2022-10-09 09:35:36 UTC	2022-10-10 05:17:27 UTC	research	CC-BY-NC
Natrix natrix	2022-10-08 16:15:23 +0200	56.1522	9.52694	grass snake	https://www.inaturalist.org/observations/138013392	2022-10-08 16:15:23+02:00	2022-10-08	2022-10-08 14:15:23 UTC	Copenhagen	9	open	false			2022-10-08 18:47:18 UTC	2022-12-30 20:23:28 UTC	research	CC-BY-NC
Natrix natrix	2022-10-07 12:44:00 +0300	55.5633	37.2778	grass snake	https://www.inaturalist.org/observations/138012595	2022/10/07 12:44	2022-10-07	2022-10-07 09:44:00 UTC	St. Petersburg	#N/A	open	false			2022-10-08 18:42:07 UTC	2023-01-10 17:48:30 UTC	research	CC-BY-NC
Natrix natrix	2022-10-07 12:36:00 +0300	55.5636	37.2784	grass snake	https://www.inaturalist.org/observations/138012586	2022/10/07 12:36	2022-10-07	2022-10-07 09:36:00 UTC	St. Petersburg	#N/A	open	false			2022-10-08 18:42:04 UTC	2023-01-10 17:48:30 UTC	research	CC-BY-NC
Natrix natrix	2022-05-06 00:00:00 +0300	43.6739	40.3018	grass snake	https://www.inaturalist.org/observations/138009301	2022-05-06	2022-05-06		St. Petersburg	79	open	false			2022-10-08 18:17:47 UTC	2022-12-16 10:22:39 UTC	research
Natrix natrix	2022-10-07 12:51:00 +0300	53.4365	33.8293	grass snake	https://www.inaturalist.org/observations/138003842	2022/10/07 12:51	2022-10-07	2022-10-07 09:51:00 UTC	St. Petersburg	8	open	false			2022-10-08 17:37:56 UTC	2022-10-08 17:40:21 UTC	research	CC-BY-NC
Natrix natrix	2022-10-08 15:12:57 +0300	56.1585	40.6521	grass snake	https://www.inaturalist.org/observations/137994666	2022-10-08 15:12:57	2022-10-08	2022-10-08 12:12:57 UTC	St. Petersburg	#N/A	open	false			2022-10-08 16:33:57 UTC	2022-10-23 18:11:51 UTC	research	CC-BY-NC
Natrix natrix	2022-10-08 13:54:00 +0300	55.6461	37.2779	grass snake	https://www.inaturalist.org/observations/137985367	2022/10/08 1:54 PM	2022-10-08	2022-10-08 10:54:00 UTC	St. Petersburg	31	open	false			2022-10-08 15:26:14 UTC	2022-10-20 05:19:56 UTC	research	CC-BY-NC
Natrix natrix	2022-10-08 15:00:17 +0200	48.1666	16.5204	grass snake	https://www.inaturalist.org/observations/137977163	2022-10-08 15:00:17	2022-10-08	2022-10-08 13:00:17 UTC	Vienna	80	open	false	gps	gps	2022-10-08 14:22:21 UTC	2023-02-17 17:41:34 UTC	research	CC-BY
Natrix natrix	2022-10-08 14:13:14 +0300	52.4616	39.5423	grass snake	https://www.inaturalist.org/observations/137972888	2022-10-08 14:13:14	2022-10-08	2022-10-08 11:13:14 UTC	St. Petersburg	#N/A	open	false	gps	gps	2022-10-08 13:44:32 UTC	2022-10-08 15:33:59 UTC	research
Natrix natrix	2022-10-08 16:32:37 +0300	56.3449	30.5079	grass snake	https://www.inaturalist.org/observations/137971807	2022-10-08 16:32:37	2022-10-08	2022-10-08 13:32:37 UTC	St. Petersburg	#N/A	open	false	gps	gps	2022-10-08 13:34:13 UTC	2022-10-08 15:33:52 UTC	research
Natrix natrix	2022-10-08 16:30:59 +0300	56.0265	40.1575	grass snake	https://www.inaturalist.org/observations/137971767	2022-10-08 16:30:59+03:00	2022-10-08	2022-10-08 13:30:59 UTC	St. Petersburg	175	open	false			2022-10-08 13:33:38 UTC	2022-10-21 05:23:13 UTC	research
Natrix natrix	2022-10-08 13:51:00 +0300	44.8833	43.4464	grass snake	https://www.inaturalist.org/observations/137963548	2022/10/08 13:51	2022-10-08	2022-10-08 10:51:00 UTC	St. Petersburg	61	open	false			2022-10-08 11:56:43 UTC	2022-10-21 05:22:57 UTC	research	CC-BY-NC
Natrix natrix	2022-10-08 13:34:09 +0200	55.9711	12.0577	grass snake	https://www.inaturalist.org/observations/137961957	Sat Oct 08 2022 13:34:09 GMT +0200 (GMT+2)	2022-10-08	2022-10-08 11:34:09 UTC	Copenhagen	116	open	false			2022-10-08 11:34:35 UTC	2022-12-30 20:23:51 UTC	research	CC-BY-NC
Natrix natrix	2022-09-18 15:04:00 +0300	61.1308	27.4811	grass snake	https://www.inaturalist.org/observations/137960086	2022-09-18 15:04:00	2022-09-18	2022-09-18 12:04:00 UTC	Helsinki	20	open	true	gps	gps	2022-10-08 11:05:19 UTC	2022-10-08 11:08:42 UTC	research	CC-BY-NC
Natrix natrix	2022-10-08 13:00:05 +0200	51.699	10.4288	grass snake	https://www.inaturalist.org/observations/137960014	2022-10-08 13:00:05	2022-10-08	2022-10-08 11:00:05 UTC	Berlin	7	open	false	gps	gps	2022-10-08 11:03:37 UTC	2022-10-08 12:01:30 UTC	research	CC-BY-NC
Natrix natrix	2022-10-03 14:09:12 +0200	56.06	9.73048	grass snake	https://www.inaturalist.org/observations/137957176	Mon Oct 03 2022 14:09:12 GMT +0200 (GMT+2)	2022-10-03	2022-10-03 12:09:12 UTC	Copenhagen	15	open	false			2022-10-08 10:18:02 UTC	2022-10-12 05:16:59 UTC	research	CC-BY-NC
Natrix natrix	2022-10-08 10:49:26 +0200	47.5933	10.6845	grass snake	https://www.inaturalist.org/observations/137956351	2022-10-08 10:49:26+02:00	2022-10-08	2022-10-08 08:49:26 UTC	Berlin	48	open	false			2022-10-08 10:05:42 UTC	2022-10-08 12:54:08 UTC	research
Natrix natrix	2022-10-07 17:12:59 +0200	49.2931	16.4732	grass snake	https://www.inaturalist.org/observations/137947037	2022-10-07 17:12:59	2022-10-07	2022-10-07 15:12:59 UTC	Prague	4	open	false			2022-10-08 06:46:23 UTC	2022-10-12 05:17:03 UTC	research	CC-BY-SA
Natrix natrix	2022-09-22 16:47:00 +0200	48.8854	8.8425	grass snake	https://www.inaturalist.org/observations/137945583	2022-09-22 16:47:00+02:00	2022-09-22	2022-09-22 14:47:00 UTC	Berlin	142	open	false			2022-10-08 06:18:36 UTC	2022-10-08 06:33:40 UTC	research	CC-BY-NC
Natrix natrix	2022-10-07 15:39:56 +0200	53.4936	9.79977	grass snake	https://www.inaturalist.org/observations/137883275	2022-10-07 15:39:56	2022-10-07	2022-10-07 13:39:56 UTC	Berlin	#N/A	open	false	gps	gps	2022-10-07 17:57:05 UTC	2022-10-12 05:17:14 UTC	research
Natrix natrix	2022-10-07 18:02:27 +0200	49.3015	14.3028	grass snake	https://www.inaturalist.org/observations/137870166	2022-10-07 18:02:27+02:00	2022-10-07	2022-10-07 16:02:27 UTC	Prague	10	open	false			2022-10-07 16:07:57 UTC	2022-10-20 05:20:17 UTC	research
Natrix natrix	2022-10-07 16:25:43 +0300	50.2925	28.581	grass snake	https://www.inaturalist.org/observations/137866554	2022-10-07 16:25:43	2022-10-07	2022-10-07 13:25:43 UTC	Kyiv	#N/A	open	false	gps	gps	2022-10-07 15:32:01 UTC	2022-10-07 19:35:42 UTC	research	CC-BY-NC
Natrix natrix	2022-10-07 10:20:55 +0300	54.0495	23.9835	grass snake	https://www.inaturalist.org/observations/137846095	2022-10-07 10:20:55	2022-10-07	2022-10-07 07:20:55 UTC	Vilnius	7	open	false			2022-10-07 11:01:59 UTC	2022-10-20 05:20:03 UTC	research
Natrix natrix	2022-10-07 13:19:00 +0300	46.7343	23.5338	grass snake	https://www.inaturalist.org/observations/137844009	2022-10-07 13:19:00	2022-10-07	2022-10-07 10:19:00 UTC	Bucharest	55	open	false	gps	gps	2022-10-07 10:20:45 UTC	2022-10-09 16:57:35 UTC	research	CC-BY-NC
Natrix natrix	2022-09-18 13:25:12 +0300	55.0577	25.4457	grass snake	https://www.inaturalist.org/observations/137830999	2022-09-18 13:25:12	2022-09-18	2022-09-18 10:25:12 UTC	Vilnius	#N/A	open	false	gps	gps	2022-10-07 05:18:54 UTC	2022-10-07 05:32:01 UTC	research
Natrix natrix	2022-10-06 14:56:00 +0200	51.4828	18.9652	grass snake	https://www.inaturalist.org/observations/137771114	2022/10/06 14:56	2022-10-06	2022-10-06 12:56:00 UTC	Warsaw	15	open	false			2022-10-06 18:01:18 UTC	2022-10-06 18:24:38 UTC	research	CC-BY-NC
Natrix natrix	2022-10-01 11:23:00 +0300	51.4294	41.4996	grass snake	https://www.inaturalist.org/observations/137766572	2022/10/01 11:23	2022-10-01	2022-10-01 08:23:00 UTC	St. Petersburg	37	open	false			2022-10-06 17:20:53 UTC	2022-10-06 17:43:55 UTC	research	CC-BY-NC
Natrix natrix	2022-10-06 15:26:18 +0300	50.2981	28.4228	grass snake	https://www.inaturalist.org/observations/137755723	2022-10-06 15:26:18	2022-10-06	2022-10-06 12:26:18 UTC	Kyiv	#N/A	open	false	gps	gps	2022-10-06 15:55:59 UTC	2022-10-09 05:42:29 UTC	research	CC-BY-NC
Natrix natrix	2022-10-06 17:46:35 +0200	49.0878	9.98108	grass snake	https://www.inaturalist.org/observations/137754921	2022-10-06 17:46:35+02:00	2022-10-06	2022-10-06 15:46:35 UTC	Berlin	5154	open	false			2022-10-06 15:48:10 UTC	2022-10-09 05:42:43 UTC	research
Natrix natrix	2022-10-06 14:54:31 +0200	48.1953	16.5388	grass snake	https://www.inaturalist.org/observations/137753954	2022-10-06 14:54:31	2022-10-06	2022-10-06 12:54:31 UTC	Vienna	26	open	false	gps	gps	2022-10-06 15:39:25 UTC	2023-02-13 18:19:57 UTC	research	CC-BY
Natrix natrix	2022-10-06 14:56:10 +0200	48.1954	16.539	grass snake	https://www.inaturalist.org/observations/137753850	2022-10-06 14:56:10	2022-10-06	2022-10-06 12:56:10 UTC	Vienna	33	open	false	gps	gps	2022-10-06 15:38:22 UTC	2023-02-13 18:19:57 UTC	research	CC-BY
Natrix natrix	2022-10-06 16:38:10 +0200	44.88	15.6183	grass snake	https://www.inaturalist.org/observations/137747654	2022-10-06 16:38:10	2022-10-06	2022-10-06 14:38:10 UTC	Zagreb	128	open	false			2022-10-06 14:39:47 UTC	2023-02-11 20:24:02 UTC	research	CC-BY-NC
Natrix natrix	2022-10-06 15:35:01 +0200	56.0281	13.569	grass snake	https://www.inaturalist.org/observations/137741713	Thu Oct 06 2022 15:35:01 GMT +0200 (GMT+2)	2022-10-06	2022-10-06 13:35:01 UTC	Stockholm	2000	open	false			2022-10-06 13:35:12 UTC	2022-10-18 15:34:42 UTC	research	CC-BY-NC
Natrix natrix	2022-10-05 14:47:47 +0200	47.7193	12.8309	grass snake	https://www.inaturalist.org/observations/137678189	2022-10-05 14:47:47+02:00	2022-10-05	2022-10-05 12:47:47 UTC	Berlin	3	open	false			2022-10-05 20:57:13 UTC	2022-10-06 14:31:46 UTC	research
Natrix natrix	2022-10-05 18:11:45 +0300	59.783	21.3684	grass snake	https://www.inaturalist.org/observations/137668157	2022-10-05 18:11:45	2022-10-05	2022-10-05 15:11:45 UTC	Helsinki	#N/A	open	false	gps	gps	2022-10-05 19:25:58 UTC	2022-10-06 05:11:18 UTC	research
Natrix natrix	2022-10-05 16:41:28 +0300	55.8331	21.0699	grass snake	https://www.inaturalist.org/observations/137641064	2022-10-05 16:41:28	2022-10-05	2022-10-05 13:41:28 UTC	Vilnius	#N/A	open	false	gps	gps	2022-10-05 15:06:30 UTC	2022-10-05 21:17:35 UTC	research
Natrix natrix	2022-10-05 16:02:56 +0300	55.8168	21.0719	grass snake	https://www.inaturalist.org/observations/137629077	2022-10-05 16:02:56	2022-10-05	2022-10-05 13:02:56 UTC	Vilnius	#N/A	open	false	gps	gps	2022-10-05 13:06:57 UTC	2022-10-06 05:11:27 UTC	research
Natrix natrix	2022-10-05 14:48:36 +0200	49.0244	12.0469	grass snake	https://www.inaturalist.org/observations/137627734	2022-10-05 14:48:36	2022-10-05	2022-10-05 12:48:36 UTC	Berlin	179	open	false	gps	gps	2022-10-05 12:50:41 UTC	2022-10-06 05:11:42 UTC	research
Natrix natrix	2021-10-01 00:00:00 +0200	50.3188	32.4569	grass snake	https://www.inaturalist.org/observations/137620699	2021-10-01	2021-10-01		Kyiv	28705	open	false	gps	gps	2022-10-05 11:08:11 UTC	2022-10-06 05:11:47 UTC	research	CC-BY-NC
Natrix natrix	2022-10-05 12:09:12 +0200	55.0002	12.0871	grass snake	https://www.inaturalist.org/observations/137617504	2022-10-05 12:09:12	2022-10-05	2022-10-05 10:09:12 UTC	Copenhagen	10	open	false			2022-10-05 10:09:42 UTC	2022-10-06 05:11:59 UTC	research	CC-BY-NC
Natrix natrix	2022-06-01 16:07:00 +0200	48.636	9.34843	grass snake	https://www.inaturalist.org/observations/137597693	2022/06/01 16:07	2022-06-01	2022-06-01 14:07:00 UTC	Berlin	32	open	false			2022-10-05 03:07:15 UTC	2022-10-05 06:04:33 UTC	research
Natrix natrix	2022-10-04 19:19:20 +0200	55.7716	12.4758	grass snake	https://www.inaturalist.org/observations/137544509	2022-10-04 19:19:20+02:00	2022-10-04	2022-10-04 17:19:20 UTC	Copenhagen	10	open	false			2022-10-04 17:20:06 UTC	2022-12-30 20:12:15 UTC	research	CC-BY-NC
Natrix natrix	2022-10-04 13:28:03 +0200	50.7903	12.0249	grass snake	https://www.inaturalist.org/observations/137542720	2022-10-04 13:28:03+02:00	2022-10-04	2022-10-04 11:28:03 UTC	Berlin	#N/A	open	true			2022-10-04 17:04:20 UTC	2022-10-05 06:04:43 UTC	research	CC-BY-NC
Natrix natrix	2022-10-04 09:11:00 +0300	55.1656	22.5091	grass snake	https://www.inaturalist.org/observations/137527321	2022/10/04 9:11 AM	2022-10-04	2022-10-04 06:11:00 UTC	Vilnius	#N/A	open	false			2022-10-04 14:39:55 UTC	2022-10-13 07:55:03 UTC	research	CC-BY-NC
Natrix natrix	2022-10-04 16:37:09 +0200	55.6529	12.5849	grass snake	https://www.inaturalist.org/observations/137527023	Tue Oct 04 2022 16:37:09 GMT +0200 (GMT+2)	2022-10-04	2022-10-04 14:37:09 UTC	Copenhagen	8	open	false			2022-10-04 14:37:20 UTC	2022-12-30 20:12:18 UTC	research
Natrix natrix	2022-10-04 14:05:00 +0200	46.8544	15.5381	grass snake	https://www.inaturalist.org/observations/137513239	2022-10-04 14:05:00	2022-10-04	2022-10-04 12:05:00 UTC	Vienna	1483	open	false	gps	gps	2022-10-04 12:06:30 UTC	2022-10-05 06:05:45 UTC	research
Natrix natrix	2022-08-30 17:08:34 +0200	51.488	12.5409	grass snake	https://www.inaturalist.org/observations/137508778	2022-08-30 17:08:34+02:00	2022-08-30	2022-08-30 15:08:34 UTC	Berlin	940	open	false			2022-10-04 10:41:13 UTC	2022-10-05 06:05:50 UTC	research	CC-BY-NC
Natrix natrix	2022-10-04 09:14:46 +0200	52.7037	23.8808	grass snake	https://www.inaturalist.org/observations/137506347	2022-10-04 09:14:46+02:00	2022-10-04	2022-10-04 07:14:46 UTC	Warsaw	10	open	false			2022-10-04 09:50:46 UTC	2022-10-25 15:01:33 UTC	research	CC-BY-NC
Natrix natrix	2022-10-03 19:03:07 +0200	48.2429	14.3045	grass snake	https://www.inaturalist.org/observations/137431627	2022-10-03 19:03:07	2022-10-03	2022-10-03 17:03:07 UTC	Vienna	178	open	false			2022-10-03 17:05:03 UTC	2022-12-06 18:21:17 UTC	needs_id	CC-BY-NC
Natrix natrix	2022-10-03 18:26:50 +0200	53.0927	9.41983	grass snake	https://www.inaturalist.org/observations/137427675	2022-10-03 18:26:50	2022-10-03	2022-10-03 16:26:50 UTC	Berlin	9	open	false			2022-10-03 16:28:37 UTC	2022-10-04 05:14:56 UTC	research
Natrix natrix	2022-10-03 14:56:57 +0300	36.6635	29.112	grass snake	https://www.inaturalist.org/observations/137426331	2022-10-03 14:56:57	2022-10-03	2022-10-03 11:56:57 UTC	Istanbul	34	open	false	gps	gps	2022-10-03 16:16:10 UTC	2022-10-04 12:37:51 UTC	research	CC-BY-NC
Natrix natrix	2022-10-02 15:14:40 +0300	56.6585	39.4764	grass snake	https://www.inaturalist.org/observations/137405751	2022-10-02 15:14:40	2022-10-02	2022-10-02 12:14:40 UTC	St. Petersburg	#N/A	open	false	gps	gps	2022-10-03 12:59:01 UTC	2022-10-04 05:15:01 UTC	research	CC-BY-NC
Natrix natrix	2022-10-03 13:55:32 +0200	55.684	11.0693	grass snake	https://www.inaturalist.org/observations/137402359	2022-10-03 13:55:32+02:00	2022-10-03	2022-10-03 11:55:32 UTC	Copenhagen	4	open	false			2022-10-03 12:10:50 UTC	2022-10-04 05:15:06 UTC	research	CC-BY-NC
Natrix natrix	2022-10-01 12:21:00 +0300	40.3982	27.8717	grass snake	https://www.inaturalist.org/observations/137400543	2022/10/01 12:21 PM	2022-10-01	2022-10-01 09:21:00 UTC	Istanbul	61	open	false			2022-10-03 11:42:19 UTC	2022-10-04 12:39:48 UTC	research	CC-BY-NC
Natrix natrix	2022-07-19 11:01:39 +0200	46.3476	19.8197	grass snake	https://www.inaturalist.org/observations/137396852	2022-07-19 11:01:39	2022-07-19	2022-07-19 09:01:39 UTC	Budapest	219	open	false	gps	gps	2022-10-03 10:35:42 UTC	2022-10-03 12:05:40 UTC	research
Natrix natrix	2022-10-03 10:47:27 +0200	47.6402	11.2547	grass snake	https://www.inaturalist.org/observations/137395275	2022-10-03 10:47:27	2022-10-03	2022-10-03 08:47:27 UTC	Berlin	11	open	false			2022-10-03 10:08:24 UTC	2022-10-04 05:15:10 UTC	research	CC-BY-NC
Natrix natrix	2022-10-01 00:00:00 +0200	42.4661	27.4539	grass snake	https://www.inaturalist.org/observations/137391479	2022-10-01	2022-10-01		Sofia	4073	open	false	gps	gps	2022-10-03 08:51:50 UTC	2022-10-07 19:02:28 UTC	research	CC-BY-NC
Natrix natrix	2022-10-02 12:39:24 +0200	46.4008	20.1279	grass snake	https://www.inaturalist.org/observations/137352099	2022-10-02 12:39:24+02:00	2022-10-02	2022-10-02 10:39:24 UTC	Budapest	3	open	false			2022-10-02 23:37:19 UTC	2022-10-17 16:35:21 UTC	research	CC-BY-NC
Natrix natrix	2022-09-27 14:52:04 +0200	52.1381	19.8686	grass snake	https://www.inaturalist.org/observations/137350623	2022-09-27 14:52:04	2022-09-27	2022-09-27 12:52:04 UTC	Warsaw	#N/A	open	false	gps	gps	2022-10-02 23:23:40 UTC	2022-10-04 05:16:08 UTC	research	CC-BY-NC
Natrix natrix	2022-10-02 12:48:06 +0200	50.0339	19.9564	grass snake	https://www.inaturalist.org/observations/137319492	2022-10-02 12:48:06	2022-10-02	2022-10-02 10:48:06 UTC	Warsaw	67	open	false	gps	gps	2022-10-02 19:17:42 UTC	2022-10-04 05:15:54 UTC	research	CC-BY-NC
Natrix natrix	2022-10-01 14:10:00 +0300	50.1621	27.7467	grass snake	https://www.inaturalist.org/observations/137319140	2022/10/01 14:10	2022-10-01	2022-10-01 11:10:00 UTC	Kyiv	31	open	false			2022-10-02 19:15:51 UTC	2022-10-04 11:41:28 UTC	research	CC-BY-NC
Natrix natrix	2022-10-02 17:15:00 +0300	56.1299	44.1653	grass snake	https://www.inaturalist.org/observations/137303329	2022/10/02 17:15	2022-10-02	2022-10-02 14:15:00 UTC	St. Petersburg	1000	open	false			2022-10-02 17:22:04 UTC	2022-10-04 11:41:13 UTC	research	CC-BY-NC
Natrix natrix	2022-10-02 18:58:48 +0200	50.0398	18.8185	grass snake	https://www.inaturalist.org/observations/137300330	2022-10-02 18:58:48	2022-10-02	2022-10-02 16:58:48 UTC	Warsaw	#N/A	open	false			2022-10-02 17:00:39 UTC	2022-10-08 11:46:14 UTC	research
Natrix natrix	2022-10-02 17:25:52 +0200	50.7085	12.4339	grass snake	https://www.inaturalist.org/observations/137287141	Sun Oct 02 2022 17:25:52 GMT +0200 (GMT+2)	2022-10-02	2022-10-02 15:25:52 UTC	Berlin	1500	open	false			2022-10-02 15:26:26 UTC	2022-10-04 11:41:41 UTC	research
Natrix natrix	2022-10-02 16:24:45 +0100	50.2087	-5.07481	grass snake	https://www.inaturalist.org/observations/137286974	2022-10-02 16:24:45+01:00	2022-10-02	2022-10-02 15:24:45 UTC	London	3	open	false			2022-10-02 15:25:01 UTC	2022-10-02 15:25:01 UTC	casual	CC-BY-NC
Natrix natrix	2022-10-02 15:38:45 +0200	56.0524	9.46137	grass snake	https://www.inaturalist.org/observations/137274600	2022-10-02 15:38:45+02:00	2022-10-02	2022-10-02 13:38:45 UTC	Copenhagen	93	open	false			2022-10-02 13:39:30 UTC	2022-10-04 11:42:06 UTC	research	CC-BY-NC
Natrix natrix	2022-10-02 14:45:52 +0200	53.5007	10.2129	grass snake	https://www.inaturalist.org/observations/137270522	2022-10-02 14:45:52+02:00	2022-10-02	2022-10-02 12:45:52 UTC	Berlin	22	open	false			2022-10-02 12:58:01 UTC	2022-10-04 11:42:11 UTC	research	CC-BY-NC
Natrix natrix	2022-10-02 13:55:15 +0200	47.4287	-1.7951	grass snake	https://www.inaturalist.org/observations/137269535	2022-10-02 13:55:15+02:00	2022-10-02	2022-10-02 11:55:15 UTC	Paris	8	open	false			2022-10-02 12:47:02 UTC	2022-10-02 12:47:02 UTC	casual
Natrix natrix	2022-10-01 14:14:38 +0200	52.7843	21.3854	grass snake	https://www.inaturalist.org/observations/137269084	2022-10-01 14:14:38	2022-10-01	2022-10-01 12:14:38 UTC	Warsaw	#N/A	open	false	gps	gps	2022-10-02 12:41:16 UTC	2022-10-04 05:19:27 UTC	research
Natrix natrix	2022-10-02 13:22:46 +0200	52.9602	16.911	grass snake	https://www.inaturalist.org/observations/137269064	2022-10-02 13:22:46	2022-10-02	2022-10-02 11:22:46 UTC	Warsaw	#N/A	open	false	gps	gps	2022-10-02 12:41:02 UTC	2022-10-02 12:56:05 UTC	research	CC-BY-NC
Natrix natrix	2022-10-01 15:37:11 +0200	52.7834	21.3719	grass snake	https://www.inaturalist.org/observations/137267994	2022-10-01 15:37:11	2022-10-01	2022-10-01 13:37:11 UTC	Warsaw	#N/A	open	false	gps	gps	2022-10-02 12:29:13 UTC	2022-10-02 12:48:17 UTC	research
Natrix natrix	2022-10-02 14:27:07 +0200	54.448	12.5873	grass snake	https://www.inaturalist.org/observations/137267875	2022-10-02 14:27:07+02:00	2022-10-02	2022-10-02 12:27:07 UTC	Berlin	5	open	false			2022-10-02 12:27:41 UTC	2022-10-02 12:27:41 UTC	casual	CC-BY-NC
Natrix natrix	2022-10-02 15:13:16 +0300	55.8141	21.0654	grass snake	https://www.inaturalist.org/observations/137266924	2022-10-02 15:13:16	2022-10-02	2022-10-02 12:13:16 UTC	Vilnius	4	open	false	gps	gps	2022-10-02 12:15:03 UTC	2022-10-02 14:45:29 UTC	research	CC-BY
Natrix natrix	2022-10-02 14:51:52 +0300	56.376	24.8505	grass snake	https://www.inaturalist.org/observations/137265533	2022-10-02 14:51:52	2022-10-02	2022-10-02 11:51:52 UTC	Vilnius	32	open	false	gps	gps	2022-10-02 11:57:15 UTC	2022-10-02 12:57:35 UTC	research
Natrix natrix	2022-10-02 10:44:19 +0200	47.1521	15.8961	grass snake	https://www.inaturalist.org/observations/137253493	2022-10-02 10:44:19	2022-10-02	2022-10-02 08:44:19 UTC	Vienna	4	open	false	gps	gps	2022-10-02 08:47:59 UTC	2022-10-06 10:50:03 UTC	research	CC-BY
Natrix natrix	2022-08-19 12:46:00 +0300	50.3077	30.2328	grass snake	https://www.inaturalist.org/observations/137250105	2022/08/19 12:46	2022-08-19	2022-08-19 09:46:00 UTC	Kyiv	31	open	false			2022-10-02 07:45:33 UTC	2022-10-03 17:34:04 UTC	research	CC-BY-NC
Natrix natrix	2022-09-27 14:55:00 +0300	54.8118	25.0054	grass snake	https://www.inaturalist.org/observations/137247183	2022/09/27 2:55 PM	2022-09-27	2022-09-27 11:55:00 UTC	Vilnius	3	open	false			2022-10-02 06:46:09 UTC	2022-10-02 07:11:10 UTC	research	CC-BY-NC
Natrix natrix	2022-09-23 12:23:53 +0200	53.223	12.8347	grass snake	https://www.inaturalist.org/observations/137210962	2022-09-23 12:23:53	2022-09-23	2022-09-23 10:23:53 UTC	Berlin	99	open	false	gps	gps	2022-10-01 22:52:38 UTC	2022-10-02 05:05:42 UTC	research	CC-BY-NC
Natrix natrix	2021-06-16 12:59:20 +0300	42.6385	23.2122	grass snake	https://www.inaturalist.org/observations/137209214	2021-06-16 12:59:20	2021-06-16	2021-06-16 09:59:20 UTC	Sofia	14896	open	true	gps	gps	2022-10-01 22:36:56 UTC	2022-10-06 08:41:51 UTC	research	CC-BY-NC
Natrix natrix	2022-10-01 15:13:00 +0300	46.2365	43.89	grass snake	https://www.inaturalist.org/observations/137185011	2022/10/01 15:13	2022-10-01	2022-10-01 12:13:00 UTC	St. Petersburg	15	open	false			2022-10-01 19:18:00 UTC	2022-10-02 09:51:53 UTC	research	CC-BY-NC
Natrix natrix	2022-10-01 15:35:46 +0200	40.9895	19.5062	grass snake	https://www.inaturalist.org/observations/137183407	2022-10-01 15:35:46+02:00	2022-10-01	2022-10-01 13:35:46 UTC	Europe/Tirane	309	open	false			2022-10-01 19:05:32 UTC	2022-10-02 08:37:31 UTC	research
Natrix natrix	2022-07-11 09:45:00 +0200	45.3601	19.591	grass snake	https://www.inaturalist.org/observations/137181526	2022/07/11 9:45 AM	2022-07-11	2022-07-11 07:45:00 UTC	Belgrade	8210	open	false			2022-10-01 18:50:10 UTC	2022-10-01 21:47:41 UTC	research	CC-BY-NC
Natrix natrix	2022-10-01 14:55:00 +0300	52.911	40.0211	grass snake	https://www.inaturalist.org/observations/137165722	2022/10/01 14:55	2022-10-01	2022-10-01 11:55:00 UTC	St. Petersburg	244	open	false			2022-10-01 16:55:43 UTC	2022-10-01 18:27:23 UTC	research	CC-BY-NC
Natrix natrix	2021-05-10 16:38:00 +0300	49.9625	37.8215	grass snake	https://www.inaturalist.org/observations/137158904	2021/05/10 16:38	2021-05-10	2021-05-10 13:38:00 UTC	Kyiv	28	open	false	gps	gps	2022-10-01 16:04:34 UTC	2023-01-22 10:49:50 UTC	research
Natrix natrix	2022-10-01 12:11:00 +0300	55.1688	22.4812	grass snake	https://www.inaturalist.org/observations/137152544	2022/10/01 12:11 PM	2022-10-01	2022-10-01 09:11:00 UTC	Vilnius	#N/A	open	false			2022-10-01 15:16:52 UTC	2022-10-13 07:59:40 UTC	research	CC-BY-NC
Natrix natrix	1991-04-15 16:00:00 +0300	36.3146	33.8979	grass snake	https://www.inaturalist.org/observations/137144751	1991/04/15 4:00 PM	1991-04-15	1991-04-15 13:00:00 UTC	Istanbul	961	open	false			2022-10-01 14:09:29 UTC	2022-10-03 10:38:54 UTC	research	CC-BY-NC
Natrix natrix	2022-10-01 14:32:17 +0200	50.067	16.7098	grass snake	https://www.inaturalist.org/observations/137139264	2022-10-01 14:32:17+02:00	2022-10-01	2022-10-01 12:32:17 UTC	Prague	13	open	false			2022-10-01 13:13:54 UTC	2022-10-02 06:06:47 UTC	research
Natrix natrix	2022-10-01 12:20:51 +0300	56.4752	43.8692	grass snake	https://www.inaturalist.org/observations/137134896	2022-10-01 12:20:51+03:00	2022-10-01	2022-10-01 09:20:51 UTC	St. Petersburg	36	open	false			2022-10-01 12:16:03 UTC	2022-10-01 12:54:56 UTC	research	CC-BY-NC
Natrix natrix	2022-09-30 16:36:54 +0200	52.5307	16.327	grass snake	https://www.inaturalist.org/observations/137068645	2022-09-30 16:36:54+02:00	2022-09-30	2022-09-30 14:36:54 UTC	Warsaw	284	open	true			2022-09-30 20:26:26 UTC	2022-10-02 06:06:56 UTC	research	CC-BY-NC
Natrix natrix	2022-09-24 13:25:00 +0300	60.0822	30.5286	grass snake	https://www.inaturalist.org/observations/137020450	2022/09/24 13:25	2022-09-24	2022-09-24 10:25:00 UTC	St. Petersburg	#N/A	open	false			2022-09-30 13:15:38 UTC	2022-12-02 11:10:29 UTC	research	CC-BY
Natrix natrix	2022-09-30 15:13:14 +0200	55.8191	12.2329	grass snake	https://www.inaturalist.org/observations/137020236	Fri Sep 30 2022 15:13:14 GMT+0200 (GMT+2)	2022-09-30	2022-09-30 13:13:14 UTC	Copenhagen	203	open	false			2022-09-30 13:13:23 UTC	2022-10-02 06:07:11 UTC	research
Natrix natrix	2022-09-29 11:32:12 +0300	55.6489	37.4224	grass snake	https://www.inaturalist.org/observations/137010312	2022-09-29 11:32:12+03:00	2022-09-29	2022-09-29 08:32:12 UTC	St. Petersburg	194	open	false			2022-09-30 10:40:43 UTC	2022-09-30 11:39:19 UTC	research	CC-BY-NC
Natrix natrix	2022-09-20 12:05:00 +0300	55.4523	37.5056	grass snake	https://www.inaturalist.org/observations/136964931	2022-09-20 12:05:00+03:00	2022-09-20	2022-09-20 09:05:00 UTC	St. Petersburg	32	open	false			2022-09-29 22:10:30 UTC	2022-09-30 08:04:12 UTC	research	CC-BY-NC
Natrix natrix	2022-09-25 16:46:37 +0200	56.847	9.81776	grass snake	https://www.inaturalist.org/observations/136945303	2022-09-25 16:46:37+02:00	2022-09-25	2022-09-25 14:46:37 UTC	Copenhagen	10	open	false			2022-09-29 18:58:22 UTC	2022-09-30 05:13:54 UTC	research
Natrix natrix	2022-09-29 12:36:36 +0300	52.0101	27.8685	grass snake	https://www.inaturalist.org/observations/136935025	2022-09-29 12:36:36	2022-09-29	2022-09-29 09:36:36 UTC	Minsk	#N/A	open	false	gps	gps	2022-09-29 17:22:27 UTC	2022-10-01 14:05:53 UTC	research
Natrix natrix	2022-09-29 16:08:00 +0300	48.3444	25.8065	grass snake	https://www.inaturalist.org/observations/136920469	2022/09/29 4:08 PM	2022-09-29	2022-09-29 13:08:00 UTC	Kyiv	#N/A	open	false			2022-09-29 15:21:01 UTC	2022-09-30 05:14:11 UTC	research	CC-BY-NC
Natrix natrix	2015-10-03 13:48:00 +0300	50.6631	30.6337	grass snake	https://www.inaturalist.org/observations/136900334	2015/10/03 13:48	2015-10-03	2015-10-03 10:48:00 UTC	Kyiv	10	open	false			2022-09-29 10:58:40 UTC	2022-09-30 05:14:27 UTC	research	CC-BY-NC
Natrix natrix	2019-06-28 13:21:00 +0200	53.8962	23.455	grass snake	https://www.inaturalist.org/observations/136899651	2019/06/28 13:21	2019-06-28	2019-06-28 11:21:00 UTC	Warsaw	300	open	false			2022-09-29 10:43:07 UTC	2022-10-04 13:26:34 UTC	research	CC-BY-NC
Natrix natrix	2022-09-27 13:46:51 +0300	46.9917	26.1415	grass snake	https://www.inaturalist.org/observations/136841953	2022-09-27 13:46:51	2022-09-27	2022-09-27 10:46:51 UTC	Bucharest	#N/A	open	false	gps	gps	2022-09-28 20:08:13 UTC	2022-09-29 05:07:10 UTC	research	CC-BY-NC
Natrix natrix	2022-09-28 17:19:55 +0300	44.4627	28.747	grass snake	https://www.inaturalist.org/observations/136810092	2022-09-28 17:19:55	2022-09-28	2022-09-28 14:19:55 UTC	Bucharest	1692	open	false	gps	gps	2022-09-28 15:37:35 UTC	2022-09-29 05:07:19 UTC	research	CC-BY-NC
Natrix natrix	2022-09-28 12:54:18 +0200	56.4608	8.8968	grass snake	https://www.inaturalist.org/observations/136788477	2022-09-28 12:54:18	2022-09-28	2022-09-28 10:54:18 UTC	Copenhagen	4	open	false			2022-09-28 10:55:06 UTC	2022-09-29 05:07:48 UTC	research	CC-BY-NC
Natrix natrix	2022-09-28 12:54:07 +0200	56.4608	8.89669	grass snake	https://www.inaturalist.org/observations/136788476	2022-09-28 12:54:07	2022-09-28	2022-09-28 10:54:07 UTC	Copenhagen	5	open	false			2022-09-28 10:55:05 UTC	2022-09-29 05:08:00 UTC	research	CC-BY-NC
Natrix natrix	2022-09-27 17:00:00 +0300	54.0189	23.9761	grass snake	https://www.inaturalist.org/observations/136784050	2022-09-27 17:00:00+03:00	2022-09-27	2022-09-27 14:00:00 UTC	Vilnius	3282	open	false			2022-09-28 08:59:53 UTC	2022-09-29 05:08:08 UTC	research	CC-BY-NC
Natrix natrix	2022-08-23 00:00:00 +0100	45.8232	16.1447	grass snake	https://www.inaturalist.org/observations/136701535	2022-08-23	2022-08-23		Zagreb	14	open	false			2022-09-27 16:07:28 UTC	2023-02-11 20:25:42 UTC	research
Natrix natrix	2022-09-22 10:34:00 +0200	56.026	9.97225	grass snake	https://www.inaturalist.org/observations/136668084	2022/09/22 10:34	2022-09-22	2022-09-22 08:34:00 UTC	Copenhagen	4	open	false			2022-09-27 08:35:43 UTC	2022-09-28 05:16:04 UTC	research	CC-BY-NC
Natrix natrix	2022-09-14 11:08:23 +0200	52.1342	21.7571	grass snake	https://www.inaturalist.org/observations/136664491	2022-09-14 11:08:23	2022-09-14	2022-09-14 09:08:23 UTC	Warsaw	#N/A	open	false	gps	gps	2022-09-27 07:03:23 UTC	2022-09-28 05:16:08 UTC	research
Natrix natrix	2022-08-27 12:28:00 +0300	60.4068	22.1076	grass snake	https://www.inaturalist.org/observations/136612016	2022/08/27 12:28 PM	2022-08-27	2022-08-27 09:28:00 UTC	Helsinki	#N/A	open	false			2022-09-26 20:03:19 UTC	2023-01-27 17:29:31 UTC	research	CC-BY-NC-SA
Natrix natrix	2022-08-27 13:05:00 +0300	60.4068	22.1076	grass snake	https://www.inaturalist.org/observations/136612015	2022/08/27 1:05 PM	2022-08-27	2022-08-27 10:05:00 UTC	Helsinki	#N/A	open	false			2022-09-26 20:03:19 UTC	2023-01-27 17:29:44 UTC	research	CC-BY-NC-SA
Natrix natrix	2022-09-26 11:48:00 +0300	42.8989	25.1132	grass snake	https://www.inaturalist.org/observations/136604240	2022/09/26 11:48 AM	2022-09-26	2022-09-26 08:48:00 UTC	Sofia	44	open	false			2022-09-26 18:57:59 UTC	2022-09-27 17:19:38 UTC	research	CC-BY-NC
Natrix natrix	2022-09-25 15:25:42 +0300	50.2339	28.6003	grass snake	https://www.inaturalist.org/observations/136587265	2022-09-25 15:25:42+03:00	2022-09-25	2022-09-25 12:25:42 UTC	Kyiv	#N/A	open	false			2022-09-26 16:44:34 UTC	2022-09-27 15:12:22 UTC	research	CC-BY-NC
Natrix natrix	2022-05-12 14:49:00 +0200	51.0758	20.8628	grass snake	https://www.inaturalist.org/observations/136575861	2022/05/12 14:49	2022-05-12	2022-05-12 12:49:00 UTC	Warsaw	#N/A	open	false			2022-09-26 15:03:49 UTC	2022-09-27 17:19:59 UTC	research
Natrix natrix	2022-09-26 13:56:15 +0200	48.5609	14.9189	grass snake	https://www.inaturalist.org/observations/136558822	2022-09-26 13:56:15+02:00	2022-09-26	2022-09-26 11:56:15 UTC	Vienna	5	open	false			2022-09-26 11:59:35 UTC	2022-09-27 17:20:10 UTC	research	CC-BY-NC
Natrix natrix	2022-09-24 12:33:00 +0300	60.4639	22.7647	grass snake	https://www.inaturalist.org/observations/136548950	2022-09-24 12:33:00	2022-09-24	2022-09-24 09:33:00 UTC	Helsinki	20	open	false	gps	gps	2022-09-26 08:24:35 UTC	2022-09-27 17:20:31 UTC	research	CC-BY-NC
Natrix natrix	2022-04-29 10:17:00 +0300	51.259	39.3401	grass snake	https://www.inaturalist.org/observations/136546002	2022-04-29 10:17:00+03:00	2022-04-29	2022-04-29 07:17:00 UTC	St. Petersburg	348929	open	false			2022-09-26 07:18:08 UTC	2022-09-27 17:20:39 UTC	research
Natrix natrix	2022-09-25 00:00:00 +0100	55.23	9.39521	grass snake	https://www.inaturalist.org/observations/136481248	2022/09/25	2022-09-25		Copenhagen	15	open	false			2022-09-25 20:10:24 UTC	2022-09-27 17:20:46 UTC	research	CC-BY-NC
Natrix natrix	2022-09-25 11:53:00 +0300	56.3813	43.9522	grass snake	https://www.inaturalist.org/observations/136467510	2022/09/25 11:53	2022-09-25	2022-09-25 08:53:00 UTC	St. Petersburg	30	open	false			2022-09-25 18:44:46 UTC	2022-09-27 17:20:53 UTC	research	CC-BY-NC
Natrix natrix	2020-08-08 11:35:00 +0200	50.0299	11.4821	grass snake	https://www.inaturalist.org/observations/136453998	2020/08/08 11:35	2020-08-08	2020-08-08 09:35:00 UTC	Berlin	166	open	false			2022-09-25 17:12:32 UTC	2022-09-27 17:21:26 UTC	research	CC-BY-NC
Natrix natrix	2022-09-24 13:56:49 +0200	47.5144	14.6979	grass snake	https://www.inaturalist.org/observations/136453915	2022-09-24 13:56:49	2022-09-24	2022-09-24 11:56:49 UTC	Vienna	#N/A	open	false	gps	gps	2022-09-25 17:12:07 UTC	2022-09-27 17:21:34 UTC	research
Natrix natrix	2022-09-25 11:26:00 +0300	55.8861	44.4774	grass snake	https://www.inaturalist.org/observations/136453447	2022/09/25 11:26	2022-09-25	2022-09-25 08:26:00 UTC	St. Petersburg	624	open	false			2022-09-25 17:09:17 UTC	2022-09-27 17:21:40 UTC	research	CC-BY-NC
Natrix natrix	2022-09-25 12:47:00 +0200	52.3244	12.5346	grass snake	https://www.inaturalist.org/observations/136422695	2022/09/25 12:47	2022-09-25	2022-09-25 10:47:00 UTC	Berlin	#N/A	open	false			2022-09-25 13:38:01 UTC	2022-09-27 22:14:18 UTC	research	CC-BY-NC
Natrix natrix	2022-09-24 14:00:00 +0200	43.8248	15.7707	grass snake	https://www.inaturalist.org/observations/136419851	2022/09/24 2:00 PM	2022-09-24	2022-09-24 12:00:00 UTC	Zagreb	4	open	false			2022-09-25 13:12:08 UTC	2023-02-11 20:25:44 UTC	research	CC-BY-NC
Natrix natrix	2022-09-25 15:44:17 +0300	54.4791	26.8813	grass snake	https://www.inaturalist.org/observations/136417156	Sun Sep 25 2022 15:44:17 GMT +0300 (GMT+3)	2022-09-25	2022-09-25 12:44:17 UTC	Minsk	568	open	false			2022-09-25 12:45:08 UTC	2022-09-28 14:54:01 UTC	research
Natrix natrix	2022-09-25 13:22:08 +0200	56.0883	12.2795	grass snake	https://www.inaturalist.org/observations/136410022	2022-09-25 13:22:08+02:00	2022-09-25	2022-09-25 11:22:08 UTC	Copenhagen	6	open	false			2022-09-25 11:23:13 UTC	2022-10-02 19:10:01 UTC	research	CC-BY-NC
Natrix natrix	2022-09-25 11:54:41 +0200	55.8492	11.6575	grass snake	https://www.inaturalist.org/observations/136403146	Sun Sep 25 2022 11:54:41 GMT +0200 (GMT+2)	2022-09-25	2022-09-25 09:54:41 UTC	Copenhagen	142	open	false			2022-09-25 09:54:50 UTC	2022-09-27 17:22:27 UTC	research	CC-BY-NC
Natrix natrix	2022-09-25 11:52:21 +0200	55.8499	11.6575	grass snake	https://www.inaturalist.org/observations/136402889	Sun Sep 25 2022 11:52:21 GMT +0200 (GMT+2)	2022-09-25	2022-09-25 09:52:21 UTC	Copenhagen	935	open	false			2022-09-25 09:52:31 UTC	2022-10-24 22:39:57 UTC	research	CC-BY-NC
Natrix natrix	2022-09-25 11:51:33 +0200	55.8489	11.6593	grass snake	https://www.inaturalist.org/observations/136402847	Sun Sep 25 2022 11:51:33 GMT +0200 (GMT+2)	2022-09-25	2022-09-25 09:51:33 UTC	Copenhagen	1196	open	false			2022-09-25 09:51:46 UTC	2022-10-02 19:10:06 UTC	research	CC-BY-NC
Natrix natrix	2022-09-25 11:47:30 +0200	55.8492	11.6576	grass snake	https://www.inaturalist.org/observations/136402617	Sun Sep 25 2022 11:47:30 GMT +0200 (GMT+2)	2022-09-25	2022-09-25 09:47:30 UTC	Copenhagen	789	open	false			2022-09-25 09:47:40 UTC	2022-10-08 14:40:06 UTC	research	CC-BY-NC
Natrix natrix	2022-09-25 12:38:22 +0300	54.7307	25.2998	grass snake	https://www.inaturalist.org/observations/136402058	2022-09-25 12:38:22	2022-09-25	2022-09-25 09:38:22 UTC	Vilnius	9	open	false			2022-09-25 09:39:06 UTC	2022-09-27 17:22:45 UTC	research
Natrix natrix	2022-09-16 17:10:00 +0300	50.9317	34.8212	grass snake	https://www.inaturalist.org/observations/136398395	2022/09/16 17:10	2022-09-16	2022-09-16 14:10:00 UTC	Kyiv	4363	open	false			2022-09-25 08:45:32 UTC	2022-09-27 17:22:53 UTC	research
Natrix natrix	2022-09-24 13:56:00 +0200	43.6209	16.422	grass snake	https://www.inaturalist.org/observations/136392040	2022/09/24 1:56 PM	2022-09-24	2022-09-24 11:56:00 UTC	Zagreb	2	open	false			2022-09-25 06:57:41 UTC	2023-02-11 20:25:53 UTC	research	CC-BY-NC
Natrix natrix	2022-09-24 17:07:41 +0300	54.679	25.2343	grass snake	https://www.inaturalist.org/observations/136391481	2022-09-24 17:07:41	2022-09-24	2022-09-24 14:07:41 UTC	Vilnius	#N/A	open	false	gps	gps	2022-09-25 06:47:39 UTC	2022-09-27 17:23:10 UTC	research
Natrix natrix	2022-09-24 14:05:00 +0200	47.9332	16.2128	grass snake	https://www.inaturalist.org/observations/136338172	2022/09/24 14:05	2022-09-24	2022-09-24 12:05:00 UTC	Vienna	4	open	false			2022-09-24 21:16:57 UTC	2022-10-01 19:38:14 UTC	research	CC-BY-NC
Natrix natrix	2020-07-19 13:42:00 +0300	47.9443	33.4522	grass snake	https://www.inaturalist.org/observations/136320245	2020/07/19 13:42	2020-07-19	2020-07-19 10:42:00 UTC	Kyiv	#N/A	open	false			2022-09-24 19:13:37 UTC	2022-09-26 13:19:26 UTC	research	CC-BY-SA
Natrix natrix	2022-09-24 12:52:09 +0200	51.0028	15.293	grass snake	https://www.inaturalist.org/observations/136303966	2022-09-24 12:52:09+02:00	2022-09-24	2022-09-24 10:52:09 UTC	Warsaw	15	open	false			2022-09-24 17:18:25 UTC	2022-09-27 17:23:39 UTC	research	CC-BY-NC
Natrix natrix	2022-09-24 17:15:42 +0300	52.2001	27.8755	grass snake	https://www.inaturalist.org/observations/136277313	2022-09-24 17:15:42+03:00	2022-09-24	2022-09-24 14:15:42 UTC	Minsk	46	open	false			2022-09-24 14:15:58 UTC	2022-09-27 17:23:49 UTC	research	CC-BY-NC
Natrix natrix	2022-09-23 11:06:03 +0300	55.1986	38.7896	grass snake	https://www.inaturalist.org/observations/136266902	2022-09-23 11:06:03+03:00	2022-09-23	2022-09-23 08:06:03 UTC	St. Petersburg	4	open	false			2022-09-24 12:38:42 UTC	2022-09-27 17:23:57 UTC	research	CC-BY-NC
Natrix natrix	2022-08-14 10:57:00 +0200	51.7576	19.4066	grass snake	https://www.inaturalist.org/observations/136263112	2022/08/14 10:57 AM	2022-08-14	2022-08-14 08:57:00 UTC	Warsaw	28	open	false			2022-09-24 11:50:55 UTC	2022-09-27 17:24:03 UTC	research	CC-BY-NC
Natrix natrix	2022-09-18 18:15:00 +0200	49.639	22.564	grass snake	https://www.inaturalist.org/observations/136246993	2022/09/18 18:15	2022-09-18	2022-09-18 16:15:00 UTC	Warsaw	1405	open	false			2022-09-24 07:08:45 UTC	2022-09-28 05:16:55 UTC	research	CC-BY-NC
Natrix natrix	2022-09-23 16:15:00 +0200	49.6644	10.092	grass snake	https://www.inaturalist.org/observations/136186275	2022-09-23 16:15:00	2022-09-23	2022-09-23 14:15:00 UTC	Berlin	339	open	false	gps	gps	2022-09-23 18:27:52 UTC	2022-09-28 05:17:14 UTC	research	CC-BY-NC
Natrix natrix	2016-07-04 10:23:00 +0300	39.6182	20.4928	grass snake	https://www.inaturalist.org/observations/136171672	2016/07/04 10:23	2016-07-04	2016-07-04 07:23:00 UTC	Athens	935	open	false			2022-09-23 16:24:32 UTC	2022-10-22 07:07:10 UTC	research
Natrix natrix	2022-09-23 15:40:49 +0200	56.3875	10.1681	grass snake	https://www.inaturalist.org/observations/136157185	2022-09-23 15:40:49	2022-09-23	2022-09-23 13:40:49 UTC	Copenhagen	15	open	false	gps	gps	2022-09-23 14:27:27 UTC	2022-09-28 05:17:18 UTC	research	CC-BY-NC
Natrix natrix	2022-09-08 00:00:00 +0200	37.8977	23.9616	grass snake	https://www.inaturalist.org/observations/136149013	2022-09-08	2022-09-08		Athens	961	open	false	gps	gps	2022-09-23 12:58:15 UTC	2022-12-19 17:01:28 UTC	research	CC-BY-NC
Natrix natrix	2022-09-23 13:27:04 +0200	53.6414	11.37	grass snake	https://www.inaturalist.org/observations/136147061	2022-09-23 13:27:04	2022-09-23	2022-09-23 11:27:04 UTC	Berlin	38	open	false	gps	gps	2022-09-23 12:32:51 UTC	2022-11-12 07:28:21 UTC	research	CC-BY-NC
Natrix natrix	2022-09-23 14:35:14 +0300	50.3154	32.2467	grass snake	https://www.inaturalist.org/observations/136143051	Fri Sep 23 2022 14:35:14 GMT +0300 (GMT+3)	2022-09-23	2022-09-23 11:35:14 UTC	Kyiv	78	open	false			2022-09-23 11:35:30 UTC	2022-10-05 13:58:20 UTC	research	CC-BY-NC
Natrix natrix	2022-09-22 13:09:33 +0200	53.155	11.0412	grass snake	https://www.inaturalist.org/observations/136132792	2022-09-22 13:09:33	2022-09-22	2022-09-22 11:09:33 UTC	Berlin	3	open	false	gps	gps	2022-09-23 07:48:17 UTC	2022-09-24 12:04:21 UTC	research	CC-BY-NC
Natrix natrix	2022-09-17 13:20:00 +0300	55.6236	37.3598	grass snake	https://www.inaturalist.org/observations/136129985	2022/09/17 13:20	2022-09-17	2022-09-17 10:20:00 UTC	St. Petersburg	#N/A	open	false			2022-09-23 06:50:44 UTC	2022-09-23 07:07:12 UTC	research	CC-BY-NC
Natrix natrix	2022-09-23 01:42:04 +0300	50.2305	28.5693	grass snake	https://www.inaturalist.org/observations/136096524	2022-09-23 01:42:04+03:00	2022-09-23	2022-09-22 22:42:04 UTC	Kyiv	2458	open	false			2022-09-22 22:43:10 UTC	2022-09-23 05:27:16 UTC	research
Natrix natrix	2022-09-22 00:00:00 +0100	55.23	9.39524	grass snake	https://www.inaturalist.org/observations/136093473	2022/09/22	2022-09-22		Copenhagen	14	open	false			2022-09-22 22:11:13 UTC	2022-09-23 05:27:19 UTC	research	CC-BY-NC
Natrix natrix	2022-09-22 00:00:00 +0300	55.712	38.2992	grass snake	https://www.inaturalist.org/observations/136083504	2022/09/22	2022-09-22		St. Petersburg	343	open	false			2022-09-22 20:37:23 UTC	2022-12-17 11:40:42 UTC	research	CC-BY-NC
Natrix natrix	2021-10-31 12:31:55 +0100	56.0292	9.90817	grass snake	https://www.inaturalist.org/observations/136075352	2021-10-31 12:31:55+01:00	2021-10-31	2021-10-31 11:31:55 UTC	Copenhagen	7	open	false			2022-09-22 19:25:04 UTC	2022-09-23 05:27:28 UTC	research	CC-BY-NC
Natrix natrix	2022-09-22 16:11:00 +0200	55.2297	9.39964	grass snake	https://www.inaturalist.org/observations/136065390	2022/09/22 16:11	2022-09-22	2022-09-22 14:11:00 UTC	Copenhagen	31	open	false			2022-09-22 18:12:40 UTC	2022-12-01 23:10:29 UTC	research	CC-BY-NC
Natrix natrix	2022-09-22 16:47:00 +0200	51.6251	10.4003	grass snake	https://www.inaturalist.org/observations/136062102	2022-09-22 16:47:00	2022-09-22	2022-09-22 14:47:00 UTC	Berlin	13	open	false	gps	gps	2022-09-22 17:48:51 UTC	2022-09-25 18:54:04 UTC	needs_id	CC-BY
Natrix natrix	2022-09-22 16:06:37 +0200	53.2266	13.1315	grass snake	https://www.inaturalist.org/observations/136048379	2022-09-22 16:06:37	2022-09-22	2022-09-22 14:06:37 UTC	Berlin	#N/A	open	false	gps	gps	2022-09-22 15:50:11 UTC	2022-09-27 13:33:37 UTC	research	CC-BY-NC
Natrix natrix	2022-09-22 16:48:28 +0300	55.7858	21.0726	grass snake	https://www.inaturalist.org/observations/136034405	2022-09-22 16:48:28	2022-09-22	2022-09-22 13:48:28 UTC	Vilnius	12	open	false	gps	gps	2022-09-22 13:49:44 UTC	2022-09-23 05:41:28 UTC	research	CC-BY
Natrix natrix	2022-09-21 16:05:00 +0200	55.2275	9.41578	grass snake	https://www.inaturalist.org/observations/135957363	2022/09/21 16:05	2022-09-21	2022-09-21 14:05:00 UTC	Copenhagen	31	open	false			2022-09-21 20:06:31 UTC	2022-12-01 23:10:29 UTC	research	CC-BY-NC
Natrix natrix	2022-08-25 09:17:00 +0200	52.51	21.1976	grass snake	https://www.inaturalist.org/observations/135896119	2022/08/25 09:17	2022-08-25	2022-08-25 07:17:00 UTC	Warsaw	15	open	false			2022-09-21 11:23:49 UTC	2022-10-02 12:24:05 UTC	research	CC-BY-NC
Natrix natrix	2014-09-06 17:35:00 +0200	55.1626	11.1633	grass snake	https://www.inaturalist.org/observations/135893060	2014/09/06 5:35 PM	2014-09-06	2014-09-06 15:35:00 UTC	Copenhagen	1597	open	false			2022-09-21 10:24:01 UTC	2022-09-22 05:20:10 UTC	research	CC-BY-NC
Natrix natrix	2014-09-06 15:43:00 +0200	55.1614	11.1555	grass snake	https://www.inaturalist.org/observations/135893059	2014/09/06 3:43 PM	2014-09-06	2014-09-06 13:43:00 UTC	Copenhagen	1186	open	false			2022-09-21 10:24:01 UTC	2022-09-22 05:20:14 UTC	research	CC-BY-NC
Natrix natrix	2022-09-10 09:01:17 +0300	50.9077	34.7981	grass snake	https://www.inaturalist.org/observations/135889992	2022-09-10 09:01:17	2022-09-10	2022-09-10 06:01:17 UTC	Kyiv	9999	open	false	gps	gps	2022-09-21 09:19:57 UTC	2022-09-22 05:20:24 UTC	research
Natrix natrix	2022-09-18 13:35:13 +0200	55.5939	12.5498	grass snake	https://www.inaturalist.org/observations/135803362	2022-09-18 13:35:13+02:00	2022-09-18	2022-09-18 11:35:13 UTC	Copenhagen	9	open	false			2022-09-20 16:36:33 UTC	2022-12-30 20:12:56 UTC	research	CC-BY-NC
Natrix natrix	2022-04-15 17:55:00 +0300	42.7772	23.3509	grass snake	https://www.inaturalist.org/observations/135800319	2022/04/15 17:55	2022-04-15	2022-04-15 14:55:00 UTC	Sofia	14896	open	true			2022-09-20 16:11:14 UTC	2022-09-22 21:18:43 UTC	research	CC-BY-NC
Natrix natrix	2022-09-20 17:18:25 +0300	55.3437	21.1957	grass snake	https://www.inaturalist.org/observations/135794999	2022-09-20 17:18:25	2022-09-20	2022-09-20 14:18:25 UTC	Vilnius	33	open	false	gps	gps	2022-09-20 15:30:17 UTC	2022-09-21 05:09:19 UTC	research
Natrix natrix	2022-09-20 13:48:12 +0300	47.0466	27.6635	grass snake	https://www.inaturalist.org/observations/135769335	Tue Sep 20 2022 13:48:12 GMT +0300 (GMT+3)	2022-09-20	2022-09-20 10:48:12 UTC	Bucharest	35	open	false			2022-09-20 10:48:19 UTC	2022-10-31 20:04:20 UTC	research	CC-BY-NC
Natrix natrix	2022-09-17 15:01:45 +0300	52.7463	41.5891	grass snake	https://www.inaturalist.org/observations/135762699	2022-09-17 15:01:45	2022-09-17	2022-09-17 12:01:45 UTC	St. Petersburg	#N/A	open	false	gps	gps	2022-09-20 08:24:33 UTC	2022-09-21 05:09:28 UTC	research	CC-BY-NC
Natrix natrix	2022-09-19 00:00:00 +0100	55.23	9.39516	grass snake	https://www.inaturalist.org/observations/135693604	2022/09/19	2022-09-19		Copenhagen	18	open	false			2022-09-19 18:34:13 UTC	2022-09-21 05:09:49 UTC	research	CC-BY-NC
Natrix natrix	2022-09-19 19:45:23 +0200	55.7984	12.5464	grass snake	https://www.inaturalist.org/observations/135688012	2022-09-19 19:45:23+02:00	2022-09-19	2022-09-19 17:45:23 UTC	Copenhagen	22	open	false			2022-09-19 17:46:39 UTC	2022-12-30 20:13:18 UTC	research
Natrix natrix	2022-09-19 13:01:49 +0200	55.2243	9.40496	grass snake	https://www.inaturalist.org/observations/135647452	2022-09-19 13:01:49+02:00	2022-09-19	2022-09-19 11:01:49 UTC	Copenhagen	22	open	false			2022-09-19 11:05:03 UTC	2022-09-21 05:09:58 UTC	research	CC-BY-NC
Natrix natrix	2022-09-17 11:23:00 +0300	52.2473	42.4624	grass snake	https://www.inaturalist.org/observations/135553605	2022/09/17 11:23	2022-09-17	2022-09-17 08:23:00 UTC	St. Petersburg	15	open	false			2022-09-18 18:21:11 UTC	2022-09-19 05:11:39 UTC	research	CC-BY
Natrix natrix	2022-09-18 14:18:00 +0300	56.0052	44.1602	grass snake	https://www.inaturalist.org/observations/135545398	2022/09/18 14:18	2022-09-18	2022-09-18 11:18:00 UTC	St. Petersburg	8	open	false			2022-09-18 17:24:32 UTC	2022-09-19 16:00:05 UTC	research	CC-BY-NC
Natrix natrix	2022-09-17 13:18:00 +0300	55.7234	44.187	grass snake	https://www.inaturalist.org/observations/135545395	2022/09/17 13:18	2022-09-17	2022-09-17 10:18:00 UTC	St. Petersburg	61	open	false			2022-09-18 17:24:31 UTC	2022-09-19 16:00:22 UTC	research	CC-BY-NC
Natrix natrix	2022-09-18 12:19:00 +0300	56.8639	40.905	grass snake	https://www.inaturalist.org/observations/135521141	2022/09/18 12:19	2022-09-18	2022-09-18 09:19:00 UTC	St. Petersburg	31	open	false			2022-09-18 14:49:29 UTC	2022-09-19 05:11:46 UTC	research	CC-BY-NC
Natrix natrix	2022-09-18 13:34:33 +0200	55.594	12.5498	grass snake	https://www.inaturalist.org/observations/135508177	2022-09-18 13:34:33	2022-09-18	2022-09-18 11:34:33 UTC	Copenhagen	10	open	false	gps	gps	2022-09-18 12:55:47 UTC	2022-12-30 20:13:24 UTC	research	CC-BY-NC
Natrix natrix	2022-09-18 15:23:06 +0300	55.2701	21.3239	grass snake	https://www.inaturalist.org/observations/135505153	Sun Sep 18 2022 15:23:06 GMT +0300 (GMT+3)	2022-09-18	2022-09-18 12:23:06 UTC	Vilnius	384	open	false			2022-09-18 12:23:23 UTC	2022-09-19 18:17:21 UTC	research
Natrix natrix	2022-09-18 13:36:50 +0300	60.2137	23.7705	grass snake	https://www.inaturalist.org/observations/135503206	2022-09-18 13:36:50	2022-09-18	2022-09-18 10:36:50 UTC	Helsinki	162	open	false	gps	gps	2022-09-18 12:01:28 UTC	2022-09-19 05:12:08 UTC	research
Natrix natrix	2009-06-20 11:09:00 +0200	53.3192	10.9188	grass snake	https://www.inaturalist.org/observations/135502155	2009/06/20 11:09	2009-06-20	2009-06-20 09:09:00 UTC	Berlin	411	open	false			2022-09-18 11:48:53 UTC	2022-09-19 05:12:11 UTC	research	CC-BY-NC
Natrix natrix	2022-09-11 10:49:00 +0300	50.1485	27.742	grass snake	https://www.inaturalist.org/observations/135501337	2022/09/11 10:49	2022-09-11	2022-09-11 07:49:00 UTC	Kyiv	31	open	false			2022-09-18 11:39:13 UTC	2022-09-19 05:12:14 UTC	research	CC-BY-NC
Natrix natrix	2022-09-17 15:34:00 +0300	55.363	38.6067	grass snake	https://www.inaturalist.org/observations/135416497	2022/09/17 15:34	2022-09-17	2022-09-17 12:34:00 UTC	St. Petersburg	#N/A	open	false			2022-09-17 19:18:49 UTC	2022-09-17 22:40:22 UTC	research	CC-BY
Natrix natrix	2022-09-17 15:31:34 +0300	55.8476	37.281	grass snake	https://www.inaturalist.org/observations/135399422	2022-09-17 15:31:34+03:00	2022-09-17	2022-09-17 12:31:34 UTC	St. Petersburg	3	open	false			2022-09-17 17:20:10 UTC	2022-09-17 20:23:52 UTC	research	CC-BY
Natrix natrix	2022-09-17 16:42:22 +0300	55.7565	38.9928	grass snake	https://www.inaturalist.org/observations/135370150	2022-09-17 16:42:22	2022-09-17	2022-09-17 13:42:22 UTC	St. Petersburg	7	open	false			2022-09-17 14:00:16 UTC	2022-09-22 05:21:02 UTC	research	CC-BY-NC
Natrix natrix	2022-09-17 11:13:00 +0300	48.5201	44.5091	grass snake	https://www.inaturalist.org/observations/135363506	2022/09/17 11:13	2022-09-17	2022-09-17 08:13:00 UTC	Volgograd	8	open	false			2022-09-17 12:55:24 UTC	2022-09-22 05:20:59 UTC	research	CC-BY-NC
Natrix natrix	2022-09-17 14:44:00 +0300	55.639	38.8371	grass snake	https://www.inaturalist.org/observations/135357546	2022-09-17 14:44:00	2022-09-17	2022-09-17 11:44:00 UTC	St. Petersburg	601	open	false	gps	gps	2022-09-17 11:44:20 UTC	2022-09-22 05:20:45 UTC	research
Natrix natrix	2022-09-17 13:33:25 +0200	52.7002	23.8394	grass snake	https://www.inaturalist.org/observations/135356777	2022-09-17 13:33:25+02:00	2022-09-17	2022-09-17 11:33:25 UTC	Warsaw	4	open	false			2022-09-17 11:33:44 UTC	2022-09-17 20:24:33 UTC	research	CC-BY-NC
Natrix natrix	2022-09-17 12:46:58 +0200	56.0292	9.96763	grass snake	https://www.inaturalist.org/observations/135353694	2022-09-17 12:46:58+02:00	2022-09-17	2022-09-17 10:46:58 UTC	Copenhagen	35	open	false			2022-09-17 10:47:23 UTC	2022-09-22 05:21:07 UTC	research
Natrix natrix	2022-09-17 10:45:00 +0300	55.9812	37.2231	grass snake	https://www.inaturalist.org/observations/135352820	2022/09/17 10:45	2022-09-17	2022-09-17 07:45:00 UTC	St. Petersburg	15	open	false			2022-09-17 10:31:08 UTC	2022-09-17 20:24:51 UTC	research	CC-BY
Natrix natrix	2022-09-17 11:49:22 +0300	56.0239	40.161	grass snake	https://www.inaturalist.org/observations/135347981	2022-09-17 11:49:22+03:00	2022-09-17	2022-09-17 08:49:22 UTC	St. Petersburg	32	open	false			2022-09-17 08:50:54 UTC	2022-09-17 20:25:20 UTC	research
Natrix natrix	2022-09-07 14:04:12 +0200	55.8268	12.5628	grass snake	https://www.inaturalist.org/observations/135345969	2022-09-07 14:04:12	2022-09-07	2022-09-07 12:04:12 UTC	Copenhagen	#N/A	open	false	gps	gps	2022-09-17 08:00:31 UTC	2022-12-30 20:13:32 UTC	research	CC-BY-NC
Natrix natrix	2022-09-15 10:04:00 +0300	55.1608	22.5005	grass snake	https://www.inaturalist.org/observations/135337709	2022/09/15 10:04 AM	2022-09-15	2022-09-15 07:04:00 UTC	Vilnius	31	open	false			2022-09-17 05:03:53 UTC	2022-09-17 20:25:36 UTC	research	CC-BY-NC
Natrix natrix	2022-05-29 13:03:00 +0200	50.7504	14.7135	grass snake	https://www.inaturalist.org/observations/135282256	2022/05/29 1:03 PM	2022-05-29	2022-05-29 11:03:00 UTC	Prague	#N/A	open	false			2022-09-16 19:14:05 UTC	2022-11-28 21:44:44 UTC	research	CC-BY
Natrix natrix	2022-09-16 13:34:00 +0300	55.5794	37.559	grass snake	https://www.inaturalist.org/observations/135232129	2022/09/16 13:34	2022-09-16	2022-09-16 10:34:00 UTC	St. Petersburg	#N/A	open	false			2022-09-16 11:58:26 UTC	2022-09-17 20:25:53 UTC	research	CC-BY-NC
Natrix natrix	2022-09-16 14:20:17 +0300	55.4974	25.0016	grass snake	https://www.inaturalist.org/observations/135230025	2022-09-16 14:20:17	2022-09-16	2022-09-16 11:20:17 UTC	Vilnius	7	open	false			2022-09-16 11:20:47 UTC	2022-09-21 05:10:21 UTC	research
Natrix natrix	2022-09-16 12:48:31 +0300	58.0609	38.2403	grass snake	https://www.inaturalist.org/observations/135227900	2022-09-16 12:48:31+03:00	2022-09-16	2022-09-16 09:48:31 UTC	St. Petersburg	4	open	false			2022-09-16 10:36:11 UTC	2022-09-29 03:25:18 UTC	research	CC-BY-NC
Natrix natrix	2022-09-16 12:38:10 +0300	58.0619	38.2477	grass snake	https://www.inaturalist.org/observations/135227806	2022-09-16 12:38:10+03:00	2022-09-16	2022-09-16 09:38:10 UTC	St. Petersburg	4	open	false			2022-09-16 10:34:57 UTC	2022-09-16 11:35:23 UTC	research	CC-BY-NC
Natrix natrix	2022-09-16 12:25:44 +0300	58.0616	38.2366	grass snake	https://www.inaturalist.org/observations/135225050	2022-09-16 12:25:44+03:00	2022-09-16	2022-09-16 09:25:44 UTC	St. Petersburg	15	open	false			2022-09-16 09:31:26 UTC	2022-09-17 20:26:27 UTC	research	CC-BY-NC
Natrix natrix	2022-09-15 16:58:13 +0200	46.012	13.5386	grass snake	https://www.inaturalist.org/observations/135174071	2022-09-15 16:58:13	2022-09-15	2022-09-15 14:58:13 UTC	Rome	2365	open	true	gps	gps	2022-09-15 21:40:09 UTC	2022-10-01 12:27:34 UTC	needs_id	CC-BY
Natrix natrix	2022-08-21 14:46:11 +0200	52.0284	7.65447	grass snake	https://www.inaturalist.org/observations/135102090	2022-08-21 14:46:11+02:00	2022-08-21	2022-08-21 12:46:11 UTC	Berlin	16	open	false			2022-09-15 11:44:40 UTC	2022-09-16 05:12:53 UTC	research
Natrix natrix	2022-09-13 20:46:06 +0300	38.1447	21.3745	grass snake	https://www.inaturalist.org/observations/135098031	2022-09-13 20:46:06	2022-09-13	2022-09-13 17:46:06 UTC	Athens	65	open	false	gps	gps	2022-09-15 10:28:25 UTC	2022-09-16 05:13:29 UTC	research	CC-BY-NC
Natrix natrix	2022-09-14 14:47:22 +0300	54.8664	23.9821	grass snake	https://www.inaturalist.org/observations/135079398	2022-09-14 14:47:22	2022-09-14	2022-09-14 11:47:22 UTC	Vilnius	#N/A	open	false	gps	gps	2022-09-15 04:09:27 UTC	2022-09-16 05:12:57 UTC	research
Natrix natrix	2022-09-12 14:55:40 +0300	60.92	26.4451	grass snake	https://www.inaturalist.org/observations/135035273	2022-09-12 14:55:40	2022-09-12	2022-09-12 11:55:40 UTC	Helsinki	2872	open	false	gps	gps	2022-09-14 20:38:37 UTC	2022-09-15 05:08:32 UTC	research
Natrix natrix	2022-09-14 15:50:28 +0300	59.5766	25.95	grass snake	https://www.inaturalist.org/observations/135012320	2022-09-14 15:50:28+03:00	2022-09-14	2022-09-14 12:50:28 UTC	Tallinn	8	open	false			2022-09-14 17:42:30 UTC	2022-09-15 05:08:39 UTC	research	CC-BY-NC
Natrix natrix	2022-04-21 11:55:23 +0300	59.9734	24.3975	grass snake	https://www.inaturalist.org/observations/135008702	2022-04-21 11:55:23	2022-04-21	2022-04-21 08:55:23 UTC	Helsinki	1455	open	false	gps	gps	2022-09-14 17:16:02 UTC	2022-09-15 05:08:42 UTC	research
Natrix natrix	2022-09-14 12:32:05 +0300	58.4561	28.0792	grass snake	https://www.inaturalist.org/observations/134994737	2022-09-14 12:32:05	2022-09-14	2022-09-14 09:32:05 UTC	St. Petersburg	8	open	false			2022-09-14 15:32:56 UTC	2022-09-15 05:08:46 UTC	research	CC-BY-NC
Natrix natrix	2022-09-14 10:30:22 +0200	48.2615	16.3762	grass snake	https://www.inaturalist.org/observations/134962151	2022-09-14 10:30:22	2022-09-14	2022-09-14 08:30:22 UTC	Vienna	8	open	false			2022-09-14 08:42:32 UTC	2022-09-15 05:09:30 UTC	research	CC-BY-NC
Natrix natrix	2020-03-19 11:23:00 +0100	46.3164	16.7318	grass snake	https://www.inaturalist.org/observations/134906725	2020/03/19 11:23 AM	2020-03-19	2020-03-19 10:23:00 UTC	Zagreb	4	open	false			2022-09-13 20:21:53 UTC	2023-02-11 20:26:16 UTC	research
Natrix natrix	2022-09-13 21:20:17 +0300	38.1345	21.3753	grass snake	https://www.inaturalist.org/observations/134890766	2022-09-13 21:20:17	2022-09-13	2022-09-13 18:20:17 UTC	Athens	5	open	false			2022-09-13 18:20:46 UTC	2022-09-13 18:20:46 UTC	casual	CC-BY-NC
Natrix natrix		45.3296	17.6728	grass snake	https://www.inaturalist.org/observations/134887258				Zagreb	65	open	false	gps	gps	2022-09-13 17:55:01 UTC	2022-09-13 17:55:21 UTC	casual
Natrix natrix	2022-09-13 14:49:58 +0300	50.5257	29.642	grass snake	https://www.inaturalist.org/observations/134885070	2022-09-13 14:49:58	2022-09-13	2022-09-13 11:49:58 UTC	Kyiv	177	open	false	gps	gps	2022-09-13 17:38:35 UTC	2022-09-16 00:30:14 UTC	research	CC-BY-NC
Natrix natrix	2022-09-12 10:15:54 +0200	40.9899	19.4849	grass snake	https://www.inaturalist.org/observations/134866772	2022-09-12 10:15:54	2022-09-12	2022-09-12 08:15:54 UTC	Europe/Tirane	#N/A	open	false	gps	gps	2022-09-13 15:15:34 UTC	2022-09-14 12:23:33 UTC	research	CC-BY-NC
Natrix natrix	2022-08-25 14:34:16 +0200	59.4141	11.9313	grass snake	https://www.inaturalist.org/observations/134860130	2022-08-25 14:34:16+02:00	2022-08-25	2022-08-25 12:34:16 UTC	Stockholm	#N/A	open	false			2022-09-13 14:26:51 UTC	2022-09-14 05:12:23 UTC	research
Natrix natrix	2022-09-13 11:22:00 +0300	56.2729	44.0128	grass snake	https://www.inaturalist.org/observations/134850644	2022/09/13 11:22	2022-09-13	2022-09-13 08:22:00 UTC	St. Petersburg	4	open	false			2022-09-13 12:51:33 UTC	2022-09-17 15:14:26 UTC	research	CC-BY-NC
Natrix natrix	2022-09-12 15:03:00 +0300	40.9183	23.0186	grass snake	https://www.inaturalist.org/observations/134847463	2022/09/12 15:03	2022-09-12	2022-09-12 12:03:00 UTC	Athens	547	open	true			2022-09-13 12:10:51 UTC	2022-09-16 19:54:48 UTC	research	CC-BY-NC
Natrix natrix	2022-09-10 14:28:00 +0300	51.6806	36.1491	grass snake	https://www.inaturalist.org/observations/134843440	2022/09/10 14:28	2022-09-10	2022-09-10 11:28:00 UTC	St. Petersburg	#N/A	open	false			2022-09-13 11:08:23 UTC	2022-09-14 05:12:20 UTC	research	CC-BY-NC
Natrix natrix	2022-09-13 11:58:39 +0300	56.3678	38.1393	grass snake	https://www.inaturalist.org/observations/134838954	2022-09-13 11:58:39+03:00	2022-09-13	2022-09-13 08:58:39 UTC	St. Petersburg	11	open	false			2022-09-13 09:42:00 UTC	2022-09-14 05:12:28 UTC	research	CC-BY-NC
Natrix natrix	2022-09-13 11:30:38 +0300	58.0664	38.2393	grass snake	https://www.inaturalist.org/observations/134838160	2022-09-13 11:30:38+03:00	2022-09-13	2022-09-13 08:30:38 UTC	St. Petersburg	4	open	false			2022-09-13 09:25:46 UTC	2022-09-13 18:39:02 UTC	research	CC-BY-NC
Natrix natrix	2022-05-24 18:10:00 +0200	44.5267	15.197	grass snake	https://www.inaturalist.org/observations/134777762	2022/05/24 6:10 PM	2022-05-24	2022-05-24 16:10:00 UTC	Zagreb	15	open	false			2022-09-12 20:32:43 UTC	2023-02-11 20:26:13 UTC	research
Natrix natrix	2021-07-25 16:35:00 +0200	51.3594	12.345	grass snake	https://www.inaturalist.org/observations/134769688	2021-07-25 16:35:00	2021-07-25	2021-07-25 14:35:00 UTC	Berlin	3	open	false	gps	gps	2022-09-12 19:33:09 UTC	2022-09-13 08:25:33 UTC	research	CC-BY-NC
Natrix natrix	2021-06-04 16:08:19 +0200	47.934	16.4613	grass snake	https://www.inaturalist.org/observations/134763939	2021-06-04 16:08:19	2021-06-04	2021-06-04 14:08:19 UTC	Vienna	384	open	false	gps	gps	2022-09-12 18:56:42 UTC	2022-09-13 05:12:24 UTC	research
Natrix natrix	2022-09-12 14:54:40 +0300	57.7125	43.7538	grass snake	https://www.inaturalist.org/observations/134752201	2022-09-12 14:54:40	2022-09-12	2022-09-12 11:54:40 UTC	St. Petersburg	1579	open	false	gps	gps	2022-09-12 17:20:21 UTC	2022-09-13 05:12:29 UTC	research	CC-BY-NC
Natrix natrix	2022-09-11 15:21:41 +0200	46.8874	15.6274	grass snake	https://www.inaturalist.org/observations/134746786	2022-09-11 15:21:41	2022-09-11	2022-09-11 13:21:41 UTC	Vienna	#N/A	open	false	gps	gps	2022-09-12 16:37:41 UTC	2022-09-13 05:12:34 UTC	research	CC-BY
Natrix natrix	2020-04-18 14:25:00 +0200	49.8218	11.5945	grass snake	https://www.inaturalist.org/observations/134742147	2020/04/18 14:25	2020-04-18	2020-04-18 12:25:00 UTC	Berlin	484	open	false			2022-09-12 15:55:40 UTC	2022-09-13 05:12:53 UTC	research	CC-BY-NC
Natrix natrix	2022-09-10 13:52:00 +0300	55.7806	37.7751	grass snake	https://www.inaturalist.org/observations/134741508	2022/09/10 13:52	2022-09-10	2022-09-10 10:52:00 UTC	St. Petersburg	595	open	false			2022-09-12 15:50:33 UTC	2022-12-12 15:43:27 UTC	research	CC-BY-NC
Natrix natrix	2022-09-12 16:43:11 +0200	56.0967	9.89744	grass snake	https://www.inaturalist.org/observations/134733768	2022-09-12 16:43:11+02:00	2022-09-12	2022-09-12 14:43:11 UTC	Copenhagen	22	open	false			2022-09-12 14:44:29 UTC	2022-09-13 05:13:04 UTC	research
Natrix natrix	2022-09-12 15:18:20 +0200	48.1924	16.4839	grass snake	https://www.inaturalist.org/observations/134725142	2022-09-12 15:18:20	2022-09-12	2022-09-12 13:18:20 UTC	Vienna	#N/A	open	false	gps	gps	2022-09-12 13:22:20 UTC	2022-09-28 20:45:01 UTC	research
Natrix natrix	2022-09-12 11:45:47 +0200	48.5367	15.6717	grass snake	https://www.inaturalist.org/observations/134722273	2022-09-12 11:45:47	2022-09-12	2022-09-12 09:45:47 UTC	Vienna	12	open	false	gps	gps	2022-09-12 12:55:13 UTC	2022-09-12 15:54:28 UTC	research	CC-BY-NC
Natrix natrix	2022-09-12 13:48:09 +0200	47.0612	15.4754	grass snake	https://www.inaturalist.org/observations/134719403	2022-09-12 13:48:09	2022-09-12	2022-09-12 11:48:09 UTC	Vienna	10	open	false	gps	gps	2022-09-12 12:22:49 UTC	2022-09-26 10:46:58 UTC	research	CC-BY-NC
Natrix natrix	2022-09-11 11:26:00 +0300	55.3874	38.6481	grass snake	https://www.inaturalist.org/observations/134718087	2022/09/11 11:26	2022-09-11	2022-09-11 08:26:00 UTC	St. Petersburg	#N/A	open	false			2022-09-12 12:03:20 UTC	2022-09-12 18:04:31 UTC	research	CC-BY-NC
Natrix natrix	2020-05-19 22:38:00 +0200	54.3442	10.204	grass snake	https://www.inaturalist.org/observations/134717651	2020/05/19 22:38	2020-05-19	2020-05-19 20:38:00 UTC	Berlin	#N/A	open	false			2022-09-12 11:58:46 UTC	2022-09-12 12:09:12 UTC	research	CC-BY-NC
Natrix natrix	2022-09-11 12:09:00 +0300	55.9837	38.1025	grass snake	https://www.inaturalist.org/observations/134713623	2022/09/11 12:09 PM	2022-09-11	2022-09-11 09:09:00 UTC	St. Petersburg	5	open	false			2022-09-12 10:53:52 UTC	2022-10-14 20:29:20 UTC	research	CC-BY-NC
Natrix natrix	2022-09-12 12:42:10 +0300	60.3407	23.7624	grass snake	https://www.inaturalist.org/observations/134710860	2022-09-12 12:42:10+03:00	2022-09-12	2022-09-12 09:42:10 UTC	Helsinki	1588	open	false			2022-09-12 09:53:16 UTC	2022-09-12 10:00:17 UTC	research	CC-BY-NC
Natrix natrix	2022-08-31 15:04:25 +0300	57.0233	40.9923	grass snake	https://www.inaturalist.org/observations/134708313	2022-08-31 15:04:25	2022-08-31	2022-08-31 12:04:25 UTC	St. Petersburg	#N/A	open	false			2022-09-12 08:55:16 UTC	2022-09-15 14:59:41 UTC	research
Natrix natrix	2022-08-14 11:29:43 +0300	53.1786	25.2784	grass snake	https://www.inaturalist.org/observations/134700634	2022-08-14 11:29:43	2022-08-14	2022-08-14 08:29:43 UTC	Minsk	441	open	false	gps	gps	2022-09-12 06:31:58 UTC	2022-11-21 07:44:09 UTC	research	CC-BY-NC
Natrix natrix	2022-09-11 00:00:00 +0100	55.23	9.39524	grass snake	https://www.inaturalist.org/observations/134645073	2022/09/11	2022-09-11		Copenhagen	16	open	false			2022-09-11 21:32:44 UTC	2022-09-12 05:32:30 UTC	research	CC-BY-NC
Natrix natrix	2022-09-10 10:03:00 +0300	51.2917	37.7882	grass snake	https://www.inaturalist.org/observations/134613416	2022/09/10 10:03	2022-09-10	2022-09-10 07:03:00 UTC	St. Petersburg	363	open	false			2022-09-11 18:04:28 UTC	2022-09-12 05:12:10 UTC	research	CC-BY-NC
Natrix natrix	2022-04-16 12:35:00 +0300	42.6028	23.3339	grass snake	https://www.inaturalist.org/observations/134611664	2022/04/16 12:35	2022-04-16	2022-04-16 09:35:00 UTC	Sofia	14896	open	true			2022-09-11 17:54:01 UTC	2022-09-19 14:06:11 UTC	research	CC-BY-NC
Natrix natrix	2022-09-08 11:31:22 +0200	47.9947	17.2185	grass snake	https://www.inaturalist.org/observations/134599603	2022-09-08 11:31:22	2022-09-08	2022-09-08 09:31:22 UTC	Budapest	#N/A	open	false	gps	gps	2022-09-11 16:38:51 UTC	2022-09-15 16:07:57 UTC	research	CC-BY
Natrix natrix	2022-09-11 15:04:00 +0300	56.3943	43.7844	grass snake	https://www.inaturalist.org/observations/134586600	2022/09/11 15:04	2022-09-11	2022-09-11 12:04:00 UTC	St. Petersburg	31	open	false			2022-09-11 15:16:15 UTC	2022-09-12 05:12:18 UTC	research	CC-BY-NC
Natrix natrix	2022-09-11 16:25:09 +0200	55.8327	12.3867	grass snake	https://www.inaturalist.org/observations/134579894	2022-09-11 16:25:09	2022-09-11	2022-09-11 14:25:09 UTC	Copenhagen	32	open	false	gps	gps	2022-09-11 14:29:33 UTC	2022-09-11 14:29:33 UTC	casual	CC0
Natrix natrix	2022-09-09 15:43:00 +0300	55.8426	37.6138	grass snake	https://www.inaturalist.org/observations/134575942	2022/09/09 15:43	2022-09-09	2022-09-09 12:43:00 UTC	St. Petersburg	15	open	false			2022-09-11 13:59:59 UTC	2022-09-12 05:12:39 UTC	research	CC-BY-NC
Natrix natrix	2022-09-11 13:18:00 +0300	55.8634	41.7614	grass snake	https://www.inaturalist.org/observations/134568004	2022/09/11 13:18	2022-09-11	2022-09-11 10:18:00 UTC	St. Petersburg	4	open	false			2022-09-11 12:53:25 UTC	2022-09-12 05:12:42 UTC	research	CC-BY-NC
Natrix natrix	2021-04-06 14:54:10 +0300	42.6893	23.3628	grass snake	https://www.inaturalist.org/observations/134563750	2021-04-06 14:54:10	2021-04-06	2021-04-06 11:54:10 UTC	Sofia	14896	open	true	gps	gps	2022-09-11 12:11:10 UTC	2022-09-12 05:12:47 UTC	research	CC-BY-NC
Natrix natrix	2022-07-26 17:22:00 +0200	53.6095	9.76453	grass snake	https://www.inaturalist.org/observations/134556574	2022-07-26 17:22:00	2022-07-26	2022-07-26 15:22:00 UTC	Berlin	429	open	false	gps	gps	2022-09-11 10:36:31 UTC	2022-09-12 16:29:45 UTC	research
Natrix natrix	2022-06-21 11:02:00 +0300	51.8204	39.4103	grass snake	https://www.inaturalist.org/observations/134555752	2022/06/21 11:02	2022-06-21	2022-06-21 08:02:00 UTC	St. Petersburg	2	open	false			2022-09-11 10:22:56 UTC	2022-09-11 11:03:29 UTC	research	CC-BY-NC
Natrix natrix	2022-09-11 12:59:31 +0300	61.4101	29.401	grass snake	https://www.inaturalist.org/observations/134554100	2022-09-11 12:59:31	2022-09-11	2022-09-11 09:59:31 UTC	Helsinki	8	open	false			2022-09-11 10:00:24 UTC	2022-09-11 12:05:13 UTC	research	CC-BY-NC
Natrix natrix	2022-09-11 10:38:05 +0300	55.0374	37.431	grass snake	https://www.inaturalist.org/observations/134545236	2022-09-11 10:38:05	2022-09-11	2022-09-11 07:38:05 UTC	St. Petersburg	8	open	false			2022-09-11 07:39:39 UTC	2022-09-11 07:59:06 UTC	research	CC-BY-NC
Natrix natrix	2022-09-11 09:23:32 +0200	55.6922	11.7752	grass snake	https://www.inaturalist.org/observations/134544497	2022-09-11 09:23:32+02:00	2022-09-11	2022-09-11 07:23:32 UTC	Copenhagen	5	open	false			2022-09-11 07:23:45 UTC	2022-09-11 07:28:25 UTC	research	CC-BY-NC
Natrix natrix	2022-09-11 09:04:28 +0200	50.3346	13.373	grass snake	https://www.inaturalist.org/observations/134543568	2022-09-11 09:04:28	2022-09-11	2022-09-11 07:04:28 UTC	Prague	2599	open	false			2022-09-11 07:05:01 UTC	2022-09-11 07:27:53 UTC	research	CC-BY-NC
Natrix natrix	2022-09-11 09:59:23 +0300	54.7921	38.4089	grass snake	https://www.inaturalist.org/observations/134543366	Sun Sep 11 2022 09:59:23 GMT +0300 (GMT+3)	2022-09-11	2022-09-11 06:59:23 UTC	St. Petersburg	21	open	false			2022-09-11 07:01:57 UTC	2022-09-11 07:45:50 UTC	research
Natrix natrix	2022-05-29 15:17:00 +0300	61.4813	30.301	grass snake	https://www.inaturalist.org/observations/134531365	2022/05/29 15:17	2022-05-29	2022-05-29 12:17:00 UTC	St. Petersburg	6387	open	false			2022-09-11 03:37:27 UTC	2022-09-15 05:10:30 UTC	research	CC-BY-NC
Natrix natrix	2021-08-14 17:11:00 +0300	54.399	40.2248	grass snake	https://www.inaturalist.org/observations/134523382	2021/08/14 17:11	2021-08-14	2021-08-14 14:11:00 UTC	St. Petersburg	1310	open	false			2022-09-11 02:20:18 UTC	2022-09-15 05:10:34 UTC	research	CC-BY-NC
Natrix natrix	2020-07-19 17:06:00 +0300	55.4616	38.433	grass snake	https://www.inaturalist.org/observations/134502832	2020/07/19 17:06	2020-07-19	2020-07-19 14:06:00 UTC	St. Petersburg	3636	open	false			2022-09-10 23:22:43 UTC	2022-09-15 05:10:46 UTC	research	CC-BY-NC
Natrix natrix	2022-06-19 12:07:00 +0300	54.9035	37.551	grass snake	https://www.inaturalist.org/observations/134470578	2022/06/19 12:07	2022-06-19	2022-06-19 09:07:00 UTC	St. Petersburg	40	open	false			2022-09-10 19:35:37 UTC	2022-11-10 13:46:31 UTC	research	CC-BY-NC
Natrix natrix	2022-09-10 21:00:48 +0200	49.2276	16.0977	grass snake	https://www.inaturalist.org/observations/134465637	2022-09-10 21:00:48+02:00	2022-09-10	2022-09-10 19:00:48 UTC	Prague	4	open	false			2022-09-10 19:01:47 UTC	2022-09-10 19:20:05 UTC	research
Natrix natrix		55.8661	37.8327	grass snake	https://www.inaturalist.org/observations/134444495				St. Petersburg	14442	open	false	gps	gps	2022-09-10 16:42:43 UTC	2022-10-02 13:09:55 UTC	casual	CC-BY-NC
Natrix natrix	2022-09-10 13:33:36 +0200	48.1609	14.1247	grass snake	https://www.inaturalist.org/observations/134418511	2022-09-10 13:33:36	2022-09-10	2022-09-10 11:33:36 UTC	Vienna	1447	open	false	gps	gps	2022-09-10 13:38:36 UTC	2022-09-10 16:55:38 UTC	research	CC-BY-NC
Natrix natrix	2018-08-26 15:51:00 +0300	58.6788	37.0462	grass snake	https://www.inaturalist.org/observations/134418014	2018/08/26 15:51	2018-08-26	2018-08-26 12:51:00 UTC	St. Petersburg	31	open	false			2022-09-10 13:34:11 UTC	2022-09-10 13:40:01 UTC	research	CC-BY-NC
Natrix natrix	2022-09-10 11:32:46 +0200	54.9885	11.523	grass snake	https://www.inaturalist.org/observations/134400099	2022-09-10 11:32:46+02:00	2022-09-10	2022-09-10 09:32:46 UTC	Copenhagen	8	open	false			2022-09-10 09:34:18 UTC	2022-09-10 10:12:45 UTC	research	CC-BY-NC
Natrix natrix	2022-09-10 11:01:08 +0200	52.5303	14.3008	grass snake	https://www.inaturalist.org/observations/134398554	Sat Sep 10 2022 11:01:08 GMT +0200 (GMT+2)	2022-09-10	2022-09-10 09:01:08 UTC	Berlin	4153	open	false			2022-09-10 09:01:48 UTC	2022-09-10 11:35:16 UTC	research	CC-BY-NC
Natrix natrix	2022-09-09 14:39:10 +0200	53.4498	12.8134	grass snake	https://www.inaturalist.org/observations/134319102	2022-09-09 14:39:10+02:00	2022-09-09	2022-09-09 12:39:10 UTC	Berlin	10	open	false			2022-09-09 17:35:45 UTC	2022-09-09 17:35:45 UTC	casual
Natrix natrix	2022-09-09 12:32:00 +0300	55.781	37.7765	grass snake	https://www.inaturalist.org/observations/134295528	2022/09/09 12:32	2022-09-09	2022-09-09 09:32:00 UTC	St. Petersburg	98	open	false			2022-09-09 14:06:09 UTC	2022-09-09 14:06:28 UTC	casual	CC-BY-NC
Natrix natrix	2022-09-09 16:53:18 +0300	60.4399	22.3749	grass snake	https://www.inaturalist.org/observations/134294530	2022-09-09 16:53:18	2022-09-09	2022-09-09 13:53:18 UTC	Helsinki	#N/A	open	false	gps	gps	2022-09-09 13:56:22 UTC	2022-10-20 08:12:47 UTC	research	CC-BY-NC
Natrix natrix	2022-09-04 10:27:00 +0200	51.747	9.36328	grass snake	https://www.inaturalist.org/observations/134283923	2022/09/04 10:27	2022-09-04	2022-09-04 08:27:00 UTC	Berlin	15	open	false			2022-09-09 11:42:10 UTC	2022-09-09 13:14:13 UTC	research
Natrix natrix	2022-07-16 18:09:00 +0300	52.1702	35.4662	grass snake	https://www.inaturalist.org/observations/134279886	2022/07/16 18:09	2022-07-16	2022-07-16 15:09:00 UTC	St. Petersburg	466	open	false			2022-09-09 10:31:29 UTC	2022-09-09 13:11:54 UTC	research	CC-BY-NC
Natrix natrix	2022-09-08 21:14:14 +0300	41.2528	23.2479	grass snake	https://www.inaturalist.org/observations/134199567	2022-09-08 21:14:14	2022-09-08	2022-09-08 18:14:14 UTC	Athens	4	open	false			2022-09-08 18:14:32 UTC	2022-09-14 11:41:10 UTC	research	CC-BY-NC
Natrix natrix	2022-09-08 12:00:12 +0300	55.7135	21.4056	grass snake	https://www.inaturalist.org/observations/134150128	2022-09-08 12:00:12	2022-09-08	2022-09-08 09:00:12 UTC	Vilnius	189	open	false	gps	gps	2022-09-08 10:12:22 UTC	2022-09-09 05:11:10 UTC	research
Natrix natrix	2022-08-15 11:59:00 +0200	51.4393	14.6016	grass snake	https://www.inaturalist.org/observations/134139519	2022/08/15 11:59	2022-08-15	2022-08-15 09:59:00 UTC	Berlin	176	open	false			2022-09-08 06:25:59 UTC	2022-09-08 06:35:14 UTC	research	CC-BY-NC
Natrix natrix	2022-08-15 11:15:00 +0200	51.4378	14.6024	grass snake	https://www.inaturalist.org/observations/134139462	2022/08/15 11:15	2022-08-15	2022-08-15 09:15:00 UTC	Berlin	176	open	false			2022-09-08 06:24:29 UTC	2022-09-08 06:35:30 UTC	research	CC-BY-NC
Natrix natrix	2022-08-23 18:23:22 +0200	43.96	15.555	grass snake	https://www.inaturalist.org/observations/134099140	2022-08-23 18:23:22	2022-08-23	2022-08-23 16:23:22 UTC	Zagreb	#N/A	open	false	gps	gps	2022-09-07 22:21:08 UTC	2023-02-11 20:26:11 UTC	research
Natrix natrix	2021-09-02 11:53:47 +0200	44.6792	18.1822	grass snake	https://www.inaturalist.org/observations/134089710	2021-09-02 10:53:47+01:00	2021-09-02	2021-09-02 09:53:47 UTC	Sarajevo	#N/A	open	false			2022-09-07 20:52:21 UTC	2022-10-15 20:38:01 UTC	research	CC-BY-NC
Natrix natrix	2022-09-06 09:13:00 +0200	46.1336	13.5266	grass snake	https://www.inaturalist.org/observations/134082350	2022/09/06 9:13 AM	2022-09-06	2022-09-06 07:13:00 UTC	Rome	#N/A	open	false			2022-09-07 19:55:24 UTC	2022-09-18 16:15:49 UTC	research	CC-BY-NC
Natrix natrix	2022-09-07 16:55:16 +0200	53.4105	12.7828	grass snake	https://www.inaturalist.org/observations/134065744	2022-09-07 16:55:16+02:00	2022-09-07	2022-09-07 14:55:16 UTC	Berlin	10	open	false			2022-09-07 17:51:07 UTC	2022-09-08 05:11:23 UTC	research
Natrix natrix	2022-09-03 12:32:00 +0300	55.6524	37.4588	grass snake	https://www.inaturalist.org/observations/134024229	2022/09/03 12:32	2022-09-03	2022-09-03 09:32:00 UTC	St. Petersburg	8	open	false			2022-09-07 11:30:05 UTC	2022-09-08 05:11:39 UTC	research	CC-BY-NC
Natrix natrix	2022-09-05 15:49:27 +0200	53.4138	12.8186	grass snake	https://www.inaturalist.org/observations/134009873	2022-09-05 15:49:27	2022-09-05	2022-09-05 13:49:27 UTC	Berlin	#N/A	open	false	gps	gps	2022-09-07 07:03:05 UTC	2022-09-08 05:11:44 UTC	research	CC-BY-NC
Natrix natrix	2022-09-07 08:52:21 +0200	52.7095	23.8932	grass snake	https://www.inaturalist.org/observations/134009529	2022-09-07 08:52:21+02:00	2022-09-07	2022-09-07 06:52:21 UTC	Warsaw	9	open	false			2022-09-07 06:53:30 UTC	2022-11-15 13:14:46 UTC	research	CC-BY-NC
Natrix natrix	2022-09-07 08:42:15 +0200	52.7063	23.8904	grass snake	https://www.inaturalist.org/observations/134009036	2022-09-07 08:42:15+02:00	2022-09-07	2022-09-07 06:42:15 UTC	Warsaw	7	open	false			2022-09-07 06:42:29 UTC	2022-09-11 12:10:01 UTC	research	CC-BY-NC
Natrix natrix	2022-09-05 14:16:00 +0200	49.5838	20.6454	grass snake	https://www.inaturalist.org/observations/133939963	2022/09/05 14:16	2022-09-05	2022-09-05 12:16:00 UTC	Warsaw	1	open	false			2022-09-06 18:17:32 UTC	2022-09-07 05:12:29 UTC	research	CC-BY-NC
Natrix natrix	2022-09-03 10:30:00 +0200	49.583	20.6272	grass snake	https://www.inaturalist.org/observations/133939811	2022/09/03 10:30	2022-09-03	2022-09-03 08:30:00 UTC	Warsaw	4	open	false			2022-09-06 18:16:20 UTC	2022-09-07 05:12:33 UTC	research	CC-BY-NC
Natrix natrix	2022-09-06 11:58:52 +0200	55.9904	12.3042	grass snake	https://www.inaturalist.org/observations/133916099	2022-09-06 11:58:52+02:00	2022-09-06	2022-09-06 09:58:52 UTC	Copenhagen	13	open	false			2022-09-06 14:55:50 UTC	2022-09-07 05:12:39 UTC	research	CC-BY-NC
Natrix natrix	2019-09-09 10:58:05 +0200	54.496	9.84284	grass snake	https://www.inaturalist.org/observations/133913916	2019-09-09 10:58:05+02:00	2019-09-09	2019-09-09 08:58:05 UTC	Berlin	2397	open	false			2022-09-06 14:32:39 UTC	2022-09-07 05:13:34 UTC	research	CC-BY-NC
Natrix natrix	2022-09-02 12:29:33 +0200	56.4501	9.95575	grass snake	https://www.inaturalist.org/observations/133894253	2022-09-02 12:29:33+02:00	2022-09-02	2022-09-02 10:29:33 UTC	Copenhagen	32	open	false			2022-09-06 10:22:43 UTC	2022-09-07 05:13:51 UTC	research	CC-BY-NC
Natrix natrix	2022-09-06 11:12:59 +0200	59.8342	18.6485	grass snake	https://www.inaturalist.org/observations/133892753	2022-09-06 11:12:59	2022-09-06	2022-09-06 09:12:59 UTC	Stockholm	#N/A	open	false	gps	gps	2022-09-06 09:51:12 UTC	2022-09-07 19:07:51 UTC	research
Natrix natrix	2022-09-04 16:05:49 +0300	55.2276	25.4181	grass snake	https://www.inaturalist.org/observations/133877710	2022-09-04 16:05:49+03:00	2022-09-04	2022-09-04 13:05:49 UTC	Vilnius	108	open	false			2022-09-06 04:56:20 UTC	2022-09-06 08:54:04 UTC	research	CC-BY-NC
Natrix natrix	2022-09-05 00:00:00 +0100	55.23	9.39538	grass snake	https://www.inaturalist.org/observations/133829963	2022/09/05	2022-09-05		Copenhagen	17	open	false			2022-09-05 21:42:29 UTC	2022-09-06 05:11:33 UTC	research	CC-BY-NC
Natrix natrix	2022-09-05 14:45:00 +0200	46.9474	16.0735	grass snake	https://www.inaturalist.org/observations/133805816	2022/09/05 14:45	2022-09-05	2022-09-05 12:45:00 UTC	Vienna	10000	open	false			2022-09-05 19:09:50 UTC	2022-09-05 19:09:50 UTC	casual	CC-BY-NC
Natrix natrix	2022-09-05 14:52:29 +0300	60.1411	24.9855	grass snake	https://www.inaturalist.org/observations/133798167	2022-09-05 14:52:29+03:00	2022-09-05	2022-09-05 11:52:29 UTC	Helsinki	3	open	false			2022-09-05 18:23:42 UTC	2022-09-06 05:12:14 UTC	research	CC-BY-NC
Natrix natrix	2022-08-29 12:07:00 +0300	57.7246	39.7796	grass snake	https://www.inaturalist.org/observations/133795787	2022/08/29 12:07	2022-08-29	2022-08-29 09:07:00 UTC	St. Petersburg	4	open	false			2022-09-05 18:08:44 UTC	2022-09-06 06:13:44 UTC	research	CC-BY-NC
Natrix natrix	2022-09-05 19:17:40 +0200	51.5589	20.136	grass snake	https://www.inaturalist.org/observations/133787954	2022-09-05 19:17:40	2022-09-05	2022-09-05 17:17:40 UTC	Warsaw	6	open	false			2022-09-05 17:18:12 UTC	2022-09-06 05:12:17 UTC	research
Natrix natrix	2022-09-02 18:09:58 +0200	47.1833	16.2022	grass snake	https://www.inaturalist.org/observations/133768677	2022-09-02 18:09:58	2022-09-02	2022-09-02 16:09:58 UTC	Vienna	131	open	false	gps	gps	2022-09-05 15:15:19 UTC	2023-02-13 18:19:57 UTC	research	CC-BY
Natrix natrix	2022-09-05 15:24:57 +0300	40.8284	21.0966	grass snake	https://www.inaturalist.org/observations/133768023	2022-09-05 15:24:57	2022-09-05	2022-09-05 12:24:57 UTC	Athens	8	open	false			2022-09-05 15:10:50 UTC	2022-09-05 15:10:50 UTC	casual	CC-BY-NC
Natrix natrix	2022-09-05 11:48:17 +0200	55.6238	11.6671	grass snake	https://www.inaturalist.org/observations/133767729	2022-09-05 11:48:17	2022-09-05	2022-09-05 09:48:17 UTC	Copenhagen	7	open	false	gps	gps	2022-09-05 15:08:31 UTC	2022-09-06 05:12:24 UTC	research	CC-BY-NC
Natrix natrix	2022-09-01 13:52:37 +0200	55.7502	12.3839	grass snake	https://www.inaturalist.org/observations/133750738	2022-09-01 13:52:37	2022-09-01	2022-09-01 11:52:37 UTC	Copenhagen	6	open	false	gps	gps	2022-09-05 12:19:11 UTC	2022-09-06 05:12:27 UTC	research
Natrix natrix	2019-04-12 15:40:00 +0300	46.1793	43.2098	grass snake	https://www.inaturalist.org/observations/133747957	2019/04/12 15:40	2019-04-12	2019-04-12 12:40:00 UTC	St. Petersburg	61	open	false			2022-09-05 11:48:21 UTC	2022-09-05 11:54:34 UTC	research	CC-BY-NC
Natrix natrix	2022-09-05 11:59:58 +0200	51.0508	14.4448	grass snake	https://www.inaturalist.org/observations/133742743	2022-09-05 11:59:58	2022-09-05	2022-09-05 09:59:58 UTC	Berlin	4222	open	false	gps	gps	2022-09-05 10:21:25 UTC	2022-09-05 10:34:40 UTC	research
Natrix natrix	2022-09-03 08:25:28 +0300	44.5357	28.8765	grass snake	https://www.inaturalist.org/observations/133731856	2022-09-03 08:25:28	2022-09-03	2022-09-03 05:25:28 UTC	Bucharest	74	open	false	gps	gps	2022-09-05 06:45:00 UTC	2022-09-05 08:09:14 UTC	research	CC-BY-NC
Natrix natrix	2022-08-14 11:53:00 +0200	51.4378	14.6021	grass snake	https://www.inaturalist.org/observations/133730333	2022/08/14 11:53	2022-08-14	2022-08-14 09:53:00 UTC	Berlin	176	open	false			2022-09-05 06:16:29 UTC	2022-09-05 08:09:25 UTC	research	CC-BY-NC
Natrix natrix	2022-09-04 14:55:42 +0200	47.5626	21.1383	grass snake	https://www.inaturalist.org/observations/133661364	2022-09-04 14:55:42	2022-09-04	2022-09-04 12:55:42 UTC	Budapest	1948	open	false			2022-09-04 19:39:20 UTC	2022-09-08 08:47:12 UTC	research	CC-BY-NC
Natrix natrix	2022-09-04 18:19:42 +0200	56.36	10.3999	grass snake	https://www.inaturalist.org/observations/133629509	2022-09-04 18:19:42+02:00	2022-09-04	2022-09-04 16:19:42 UTC	Copenhagen	56	open	false			2022-09-04 16:20:41 UTC	2022-09-05 05:03:45 UTC	research	CC-BY-NC
Natrix natrix	2022-09-04 00:00:00 +0100	59.3315	18.5827	grass snake	https://www.inaturalist.org/observations/133629062	2022-09-04	2022-09-04		Stockholm	54	open	false	gps	gps	2022-09-04 16:17:31 UTC	2022-09-07 16:28:17 UTC	research	CC-BY
Natrix natrix	2022-09-04 13:56:00 +0300	55.598	37.9033	grass snake	https://www.inaturalist.org/observations/133614821	2022/09/04 13:56	2022-09-04	2022-09-04 10:56:00 UTC	St. Petersburg	#N/A	open	false			2022-09-04 14:42:34 UTC	2022-09-05 05:03:52 UTC	research	CC-BY-NC
Natrix natrix	2022-09-04 14:33:28 +0200	55.6021	12.3642	grass snake	https://www.inaturalist.org/observations/133614658	Sun Sep 04 2022 14:33:28 GMT +0200 (GMT+2)	2022-09-04	2022-09-04 12:33:28 UTC	Copenhagen	881	open	false			2022-09-04 14:41:49 UTC	2022-09-05 05:04:12 UTC	research	CC-BY-NC
Natrix natrix	2022-09-04 15:02:00 +0300	55.3524	38.5878	grass snake	https://www.inaturalist.org/observations/133613165	2022/09/04 15:02	2022-09-04	2022-09-04 12:02:00 UTC	St. Petersburg	#N/A	open	false			2022-09-04 14:31:59 UTC	2022-09-04 14:40:54 UTC	research	CC-BY
Natrix natrix	2022-09-04 16:20:48 +0300	60.2464	23.7302	grass snake	https://www.inaturalist.org/observations/133604364	Sun Sep 04 2022 16:20:48 GMT+0300 (GMT+3)	2022-09-04	2022-09-04 13:20:48 UTC	Helsinki	48	open	false			2022-09-04 13:21:04 UTC	2022-09-09 16:10:42 UTC	research
Natrix natrix	2022-09-04 14:38:53 +0300	55.6063	38.2507	grass snake	https://www.inaturalist.org/observations/133594933	2022-09-04 14:38:53	2022-09-04	2022-09-04 11:38:53 UTC	St. Petersburg	115	open	false	gps	gps	2022-09-04 11:41:35 UTC	2022-09-05 05:04:20 UTC	research	CC-BY-NC
Natrix natrix	2022-09-04 10:32:46 +0300	40.7952	21.0708	grass snake	https://www.inaturalist.org/observations/133587907	2022-09-04 10:32:46	2022-09-04	2022-09-04 07:32:46 UTC	Athens	50	open	false	gps	gps	2022-09-04 10:00:41 UTC	2022-09-12 15:41:06 UTC	research	CC-BY-NC
Natrix natrix	2022-09-04 11:44:54 +0300	57.8412	28.2916	grass snake	https://www.inaturalist.org/observations/133583619	2022-09-04 11:44:54	2022-09-04	2022-09-04 08:44:54 UTC	St. Petersburg	10	open	false			2022-09-04 08:55:02 UTC	2022-09-04 08:55:52 UTC	casual	CC-BY-NC
Natrix natrix	2022-09-04 09:22:49 +0200	50.4631	14.6673	grass snake	https://www.inaturalist.org/observations/133577558	2022-09-04 09:22:49+02:00	2022-09-04	2022-09-04 07:22:49 UTC	Prague	4	open	false			2022-09-04 07:23:21 UTC	2022-09-04 07:23:21 UTC	casual	CC-BY-NC
Natrix natrix	2022-08-22 09:11:00 +0200	53.7057	10.1416	grass snake	https://www.inaturalist.org/observations/133573651	2022/08/22 9:11 AM	2022-08-22	2022-08-22 07:11:00 UTC	Berlin	10	open	false			2022-09-04 06:11:41 UTC	2022-09-08 09:05:41 UTC	research	CC-BY-NC
Natrix natrix	2022-09-04 07:00:56 +0300	40.6778	36.5779	grass snake	https://www.inaturalist.org/observations/133568767	2022-09-04 07:00:56+03:00	2022-09-04	2022-09-04 04:00:56 UTC	Istanbul	18	open	false			2022-09-04 04:49:52 UTC	2022-09-27 10:47:04 UTC	research
Natrix natrix	2019-06-04 17:48:00 +0200	48.0644	10.7893	grass snake	https://www.inaturalist.org/observations/133535930	2019/06/04 5:48 PM	2019-06-04	2019-06-04 15:48:00 UTC	Berlin	100	open	false			2022-09-03 22:59:34 UTC	2022-09-04 09:14:26 UTC	research	CC-BY-NC
Natrix natrix	2022-09-01 11:08:00 +0300	56.0504	37.845	grass snake	https://www.inaturalist.org/observations/133515129	2022/09/01 11:08	2022-09-01	2022-09-01 08:08:00 UTC	St. Petersburg	4	open	false			2022-09-03 20:18:33 UTC	2022-09-05 08:33:51 UTC	research	CC-BY-NC
Natrix natrix	2022-09-03 13:49:00 +0200	48.9542	12.4914	grass snake	https://www.inaturalist.org/observations/133491575	2022/09/03 13:49	2022-09-03	2022-09-03 11:49:00 UTC	Berlin	#N/A	open	false			2022-09-03 17:31:47 UTC	2022-09-06 23:36:59 UTC	research	CC-BY-NC
Natrix natrix	2022-08-20 10:47:00 +0200	53.5837	9.66825	grass snake	https://www.inaturalist.org/observations/133490815	2022/08/20 10:47	2022-08-20	2022-08-20 08:47:00 UTC	Berlin	14	open	false			2022-09-03 17:27:09 UTC	2022-10-20 14:28:37 UTC	research	CC-BY-NC
Natrix natrix	2022-09-03 14:09:00 +0300	55.3756	38.6317	grass snake	https://www.inaturalist.org/observations/133479096	2022/09/03 14:09	2022-09-03	2022-09-03 11:09:00 UTC	St. Petersburg	#N/A	open	false			2022-09-03 16:06:31 UTC	2022-11-12 15:40:21 UTC	research	CC-BY
Natrix natrix	2022-09-03 13:54:00 +0300	55.374	38.625	grass snake	https://www.inaturalist.org/observations/133479084	2022/09/03 13:54	2022-09-03	2022-09-03 10:54:00 UTC	St. Petersburg	#N/A	open	false			2022-09-03 16:06:28 UTC	2022-09-07 05:14:21 UTC	research	CC-BY
Natrix natrix	2022-08-08 00:00:00 +0100	47.667	18.3077	grass snake	https://www.inaturalist.org/observations/133458446	2022-08-08	2022-08-08		Budapest	248	open	false	gps	gps	2022-09-03 13:32:22 UTC	2022-09-07 05:14:27 UTC	research
Natrix natrix	2021-07-28 07:57:56 +0200	45.0795	14.5549	grass snake	https://www.inaturalist.org/observations/133430560	2021-07-28 07:57:56+02:00	2021-07-28	2021-07-28 05:57:56 UTC	Zagreb	56	open	false			2022-09-03 06:47:14 UTC	2023-02-11 20:26:22 UTC	research	CC-BY-NC
Natrix natrix	2007-03-27 00:00:00 +0100	54.1195	13.4073	grass snake	https://www.inaturalist.org/observations/133381028	2007/03/27	2007-03-27		Berlin	122	open	false			2022-09-02 20:37:22 UTC	2022-09-03 01:10:46 UTC	research	CC-BY-NC
Natrix natrix	2022-08-30 18:20:03 +0200	52.6602	12.2684	grass snake	https://www.inaturalist.org/observations/133368150	2022-08-30 6:20:03 PM GMT+02:00	2022-08-30	2022-08-30 16:20:03 UTC	Berlin	62	open	false	gps	gps	2022-09-02 18:55:15 UTC	2022-09-02 19:37:10 UTC	research	CC-BY-NC
Natrix natrix	2022-08-26 11:48:17 +0200	51.0977	18.6641	grass snake	https://www.inaturalist.org/observations/133362883	2022-08-26 11:48:17+02:00	2022-08-26	2022-08-26 09:48:17 UTC	Warsaw	267	open	false			2022-09-02 18:09:13 UTC	2022-09-02 18:16:35 UTC	research	CC-BY-NC
Natrix natrix	2022-05-15 12:15:00 +0300	55.6219	37.551	grass snake	https://www.inaturalist.org/observations/133359363	2022/05/15 12:15 MSK	2022-05-15	2022-05-15 09:15:00 UTC	St. Petersburg	30	open	false			2022-09-02 17:40:37 UTC	2022-09-05 12:01:36 UTC	research	CC-BY-NC
Natrix natrix	2022-09-02 19:21:58 +0200	59.2265	9.87556	grass snake	https://www.inaturalist.org/observations/133357261	2022-09-02 19:21:58	2022-09-02	2022-09-02 17:21:58 UTC	Europe/Oslo	77	open	false	gps	gps	2022-09-02 17:22:45 UTC	2022-09-07 08:11:01 UTC	research	CC-BY-NC
Natrix natrix	2022-08-25 16:42:33 +0300	45.753	24.1139	grass snake	https://www.inaturalist.org/observations/133355467	2022-08-25 16:42:33+03:00	2022-08-25	2022-08-25 13:42:33 UTC	Bucharest	13	open	false			2022-09-02 17:07:38 UTC	2022-09-02 18:17:00 UTC	research
Natrix natrix	2022-09-02 12:29:38 +0200	56.4472	9.95998	grass snake	https://www.inaturalist.org/observations/133347939	2022-09-02 12:29:38+02:00	2022-09-02	2022-09-02 10:29:38 UTC	Copenhagen	32	open	false			2022-09-02 16:10:06 UTC	2022-09-03 12:21:21 UTC	research	CC-BY-NC
Natrix natrix	2022-09-02 12:28:44 +0200	56.4474	9.95963	grass snake	https://www.inaturalist.org/observations/133320175	2022-09-02 12:28:44+02:00	2022-09-02	2022-09-02 10:28:44 UTC	Copenhagen	13	open	false			2022-09-02 11:28:52 UTC	2022-09-03 12:22:03 UTC	research	CC-BY-NC
Natrix natrix	2022-09-02 12:29:23 +0200	56.4472	9.95964	grass snake	https://www.inaturalist.org/observations/133320057	2022-09-02 12:29:23	2022-09-02	2022-09-02 10:29:23 UTC	Copenhagen	#N/A	open	false	gps	gps	2022-09-02 11:26:46 UTC	2022-09-03 12:22:07 UTC	research
Natrix natrix	2022-09-02 12:30:10 +0200	56.4472	9.95944	grass snake	https://www.inaturalist.org/observations/133317931	2022-09-02 12:30:10+02:00	2022-09-02	2022-09-02 10:30:10 UTC	Copenhagen	105	open	false			2022-09-02 10:45:05 UTC	2022-09-03 12:22:10 UTC	research	CC-BY-NC
Natrix natrix	2022-09-02 12:28:47 +0200	56.4473	9.95942	grass snake	https://www.inaturalist.org/observations/133317144	2022-09-02 12:28:47+02:00	2022-09-02	2022-09-02 10:28:47 UTC	Copenhagen	10	open	false			2022-09-02 10:32:00 UTC	2022-09-16 14:28:13 UTC	research	CC-BY-NC
Natrix natrix	2022-09-02 12:28:54 +0200	56.4472	9.95987	grass snake	https://www.inaturalist.org/observations/133317009	2022-09-02 12:28:54	2022-09-02	2022-09-02 10:28:54 UTC	Copenhagen	10	open	false			2022-09-02 10:29:55 UTC	2022-09-03 12:22:27 UTC	research	CC-BY-NC
Natrix natrix	2012-07-18 18:10:00 +0300	60.3191	24.6612	grass snake	https://www.inaturalist.org/observations/133260945	2012/07/18 6:10 PM	2012-07-18	2012-07-18 15:10:00 UTC	Helsinki	803	open	false			2022-09-01 21:39:46 UTC	2022-09-03 10:46:57 UTC	research	CC-BY-NC
Natrix natrix	2017-07-24 10:44:45 +0200	48.9646	21.4785	grass snake	https://www.inaturalist.org/observations/133213650	2017-07-24 10:44:45	2017-07-24	2017-07-24 08:44:45 UTC	Bratislava	176	open	false	gps	gps	2022-09-01 15:07:55 UTC	2022-09-02 05:20:04 UTC	research	CC-BY-NC
Natrix natrix	2022-09-01 14:07:45 +0200	51.5058	14.2824	grass snake	https://www.inaturalist.org/observations/133206500	2022-09-01 14:07:45	2022-09-01	2022-09-01 12:07:45 UTC	Berlin	815	open	false	gps	gps	2022-09-01 14:08:18 UTC	2022-09-02 12:56:29 UTC	research	CC-BY-NC
Natrix natrix	2022-08-23 12:39:47 +0200	49.0753	16.9159	grass snake	https://www.inaturalist.org/observations/133189189	2022-08-23 12:39:47	2022-08-23	2022-08-23 10:39:47 UTC	Prague	#N/A	open	false	gps	gps	2022-09-01 10:34:49 UTC	2022-09-02 05:20:20 UTC	research	CC-BY-NC
Natrix natrix	2022-08-25 11:08:03 +0300	53.9912	37.2556	grass snake	https://www.inaturalist.org/observations/133175272	2022-08-25 11:08:03	2022-08-25	2022-08-25 08:08:03 UTC	St. Petersburg	143	open	false	gps	gps	2022-09-01 05:54:45 UTC	2022-10-04 13:59:42 UTC	research
Natrix natrix	2022-08-31 14:54:47 +0200	55.4312	9.42491	grass snake	https://www.inaturalist.org/observations/133138235	2022-08-31 14:54:47	2022-08-31	2022-08-31 12:54:47 UTC	Copenhagen	#N/A	open	false			2022-08-31 22:31:06 UTC	2022-09-01 05:09:44 UTC	research	CC-BY-NC
Natrix natrix	2022-08-24 08:50:01 +0200	52.5044	21.1823	grass snake	https://www.inaturalist.org/observations/133130178	2022-08-24 08:50:01	2022-08-24	2022-08-24 06:50:01 UTC	Warsaw	335	open	false	gps	gps	2022-08-31 21:14:16 UTC	2022-09-01 05:10:02 UTC	research	CC-BY-NC
Natrix natrix	2022-08-27 10:00:47 +0300	54.0014	37.2427	grass snake	https://www.inaturalist.org/observations/133119595	2022-08-27 10:00:47	2022-08-27	2022-08-27 07:00:47 UTC	St. Petersburg	#N/A	open	false	gps	gps	2022-08-31 19:41:25 UTC	2023-01-14 20:02:26 UTC	research	CC-BY
Natrix natrix	2022-08-27 16:49:00 +0300	54.6709	24.9297	grass snake	https://www.inaturalist.org/observations/133113623	2022/08/27 4:49 PM	2022-08-27	2022-08-27 13:49:00 UTC	Vilnius	31	open	false			2022-08-31 18:54:48 UTC	2022-09-01 05:10:06 UTC	research	CC-BY-NC
Natrix natrix	2022-08-26 11:35:15 +0200	48.1951	16.5395	grass snake	https://www.inaturalist.org/observations/133066296	2022-08-26 11:35:15	2022-08-26	2022-08-26 09:35:15 UTC	Vienna	27	open	false	gps	gps	2022-08-31 11:47:35 UTC	2023-02-17 17:44:42 UTC	research	CC-BY
Natrix natrix	2022-06-09 09:47:00 +0200	49.5991	19.0625	grass snake	https://www.inaturalist.org/observations/132960242	2022/06/09 9:47 AM	2022-06-09	2022-06-09 07:47:00 UTC	Warsaw	31	open	false			2022-08-30 15:41:57 UTC	2022-08-31 05:19:54 UTC	research	CC-BY-NC
Natrix natrix	2022-08-02 15:24:00 +0200	51.8731	20.1699	grass snake	https://www.inaturalist.org/observations/132952189	2022/08/02 15:24	2022-08-02	2022-08-02 13:24:00 UTC	Warsaw	2	open	false			2022-08-30 14:36:21 UTC	2022-09-04 18:09:34 UTC	research	CC-BY-NC
Natrix natrix	2022-08-30 12:21:00 +0200	59.2695	18.2649	grass snake	https://www.inaturalist.org/observations/132951348	2022/08/30 12:21 PM	2022-08-30	2022-08-30 10:21:00 UTC	Stockholm	54	open	false			2022-08-30 14:29:13 UTC	2022-08-31 05:20:06 UTC	research	CC-BY-NC
Natrix natrix	2022-08-30 14:21:06 +0200	58.8731	9.38579	grass snake	https://www.inaturalist.org/observations/132950630	2022-08-30 14:21:06+02:00	2022-08-30	2022-08-30 12:21:06 UTC	Europe/Oslo	89	open	false			2022-08-30 14:22:32 UTC	2022-08-31 05:20:21 UTC	research	CC-BY
Natrix natrix	2022-08-30 14:44:06 +0200	49.4355	20.8477	grass snake	https://www.inaturalist.org/observations/132944224	2022-08-30 14:44:06	2022-08-30	2022-08-30 12:44:06 UTC	Warsaw	#N/A	open	false	gps	gps	2022-08-30 13:19:05 UTC	2022-11-15 09:39:20 UTC	research	CC-BY-NC
Natrix natrix	2022-08-30 14:08:31 +0200	48.744	14.0791	grass snake	https://www.inaturalist.org/observations/132937333	2022-08-30 14:08:31	2022-08-30	2022-08-30 12:08:31 UTC	Prague	8	open	false			2022-08-30 12:09:21 UTC	2022-08-31 05:20:29 UTC	research	CC-BY-NC
Natrix natrix	2022-08-28 13:43:00 +0300	51.7942	36.6331	grass snake	https://www.inaturalist.org/observations/132933276	2022/08/28 13:43	2022-08-28	2022-08-28 10:43:00 UTC	St. Petersburg	4	open	false			2022-08-30 11:12:53 UTC	2022-08-31 05:20:33 UTC	research	CC-BY-NC
Natrix natrix	2022-08-18 12:56:00 +0300	45.2475	29.29	grass snake	https://www.inaturalist.org/observations/132925623	2022/08/18 12:56	2022-08-18	2022-08-18 09:56:00 UTC	Bucharest	30	open	false			2022-08-30 08:48:48 UTC	2022-09-16 00:30:33 UTC	research	CC-BY-NC
Natrix natrix	2022-08-08 12:39:00 +0200	52.7567	13.5716	grass snake	https://www.inaturalist.org/observations/132877179	2022/08/08 12:39	2022-08-08	2022-08-08 10:39:00 UTC	Berlin	8	open	false			2022-08-29 22:01:40 UTC	2022-09-02 07:13:39 UTC	research	CC-BY-NC
Natrix natrix	2022-08-29 15:51:00 +0300	45.2013	21.8739	grass snake	https://www.inaturalist.org/observations/132872687	2022/08/29 3:51 PM	2022-08-29	2022-08-29 12:51:00 UTC	Bucharest	8	open	false			2022-08-29 21:22:49 UTC	2022-08-30 05:14:37 UTC	research	CC-BY-NC
Natrix natrix	2022-08-29 12:59:58 +0200	52.5799	13.1999	grass snake	https://www.inaturalist.org/observations/132870017	2022-08-29 12:59:58+02:00	2022-08-29	2022-08-29 10:59:58 UTC	Berlin	19	open	false			2022-08-29 20:57:52 UTC	2022-08-30 05:14:40 UTC	research
Natrix natrix	2022-08-16 16:09:59 +0200	49.2975	11.0503	grass snake	https://www.inaturalist.org/observations/132858510	2022-08-16 16:09:59	2022-08-16	2022-08-16 14:09:59 UTC	Berlin	5	open	false			2022-08-29 19:26:01 UTC	2023-01-31 16:16:27 UTC	research	CC-BY-NC-ND
Natrix natrix	2022-08-29 16:51:27 +0200	45.7688	14.3596	grass snake	https://www.inaturalist.org/observations/132857801	2022-08-29 16:51:27	2022-08-29	2022-08-29 14:51:27 UTC	Ljubljana	#N/A	open	false			2022-08-29 19:21:30 UTC	2022-08-30 20:23:02 UTC	research	CC-BY-NC
Natrix natrix	2022-08-29 14:43:02 +0200	47.7346	16.2215	grass snake	https://www.inaturalist.org/observations/132850515	2022-08-29 14:43:02	2022-08-29	2022-08-29 12:43:02 UTC	Vienna	#N/A	open	false	gps	gps	2022-08-29 18:26:02 UTC	2022-08-30 05:14:54 UTC	research
Natrix natrix	2022-08-29 20:45:56 +0300	46.9735	27.3445	grass snake	https://www.inaturalist.org/observations/132845492	2022-08-29 20:45:56	2022-08-29	2022-08-29 17:45:56 UTC	Bucharest	7	open	false	gps	gps	2022-08-29 17:47:10 UTC	2022-10-31 20:04:26 UTC	research	CC-BY
Natrix natrix	2022-08-23 22:31:00 +0200	45.7597	14.3617	grass snake	https://www.inaturalist.org/observations/132844092	2022/08/23 10:31 PM	2022-08-23	2022-08-23 20:31:00 UTC	Ljubljana	#N/A	open	false			2022-08-29 17:35:53 UTC	2022-08-30 21:13:13 UTC	research	CC-BY-NC
Natrix natrix	2022-08-27 08:55:05 +0300	54.6099	37.5047	grass snake	https://www.inaturalist.org/observations/132828386	Sat Aug 27 2022 08:55:05 GMT +0300 (GMT+3)	2022-08-27	2022-08-27 05:55:05 UTC	St. Petersburg	#N/A	open	false			2022-08-29 15:40:51 UTC	2022-09-15 07:35:19 UTC	research	CC-BY-NC
Natrix natrix	2022-08-29 13:29:58 +0300	45.2288	29.2444	grass snake	https://www.inaturalist.org/observations/132823441	2022-08-29 13:29:58	2022-08-29	2022-08-29 10:29:58 UTC	Bucharest	#N/A	open	false	gps	gps	2022-08-29 15:03:51 UTC	2022-10-23 20:50:58 UTC	research	CC-BY
Natrix natrix	2022-08-29 11:05:00 +0300	45.3157	29.2928	grass snake	https://www.inaturalist.org/observations/132802597	2022-08-29 11:05:00	2022-08-29	2022-08-29 08:05:00 UTC	Bucharest	#N/A	open	false	gps	gps	2022-08-29 11:51:56 UTC	2022-10-23 20:50:58 UTC	research	CC-BY
Natrix natrix	2022-08-27 11:12:20 +0300	56.6601	39.3973	grass snake	https://www.inaturalist.org/observations/132796589	2022-08-27 11:12:20	2022-08-27	2022-08-27 08:12:20 UTC	St. Petersburg	273	open	false	gps	gps	2022-08-29 10:31:51 UTC	2023-01-09 13:05:10 UTC	research	CC-BY-NC
Natrix natrix	2022-08-29 09:27:56 +0300	54.1391	23.706	grass snake	https://www.inaturalist.org/observations/132794146	2022-08-29 09:27:56	2022-08-29	2022-08-29 06:27:56 UTC	Vilnius	7	open	false			2022-08-29 09:52:16 UTC	2022-08-30 21:22:11 UTC	research
Natrix natrix	2022-08-29 10:35:00 +0300	55.8607	41.7691	grass snake	https://www.inaturalist.org/observations/132789020	2022/08/29 10:35	2022-08-29	2022-08-29 07:35:00 UTC	St. Petersburg	4	open	false			2022-08-29 08:30:28 UTC	2022-09-05 10:48:32 UTC	research	CC-BY-NC
Natrix natrix	2022-08-28 01:52:34 +0200	48.2354	15.6234	grass snake	https://www.inaturalist.org/observations/132684881	2022-08-28 01:52:34	2022-08-28	2022-08-27 23:52:34 UTC	Vienna	257	open	false	gps	gps	2022-08-28 20:42:41 UTC	2022-08-29 05:10:33 UTC	research
Natrix natrix	2022-08-28 20:27:53 +0200	48.1847	15.2549	grass snake	https://www.inaturalist.org/observations/132661774	2022-08-28 20:27:53+02:00	2022-08-28	2022-08-28 18:27:53 UTC	Vienna	21	open	false			2022-08-28 18:40:16 UTC	2022-09-17 10:13:58 UTC	research	CC-BY-NC
Natrix natrix	2022-08-28 14:49:00 +0300	55.8972	37.798	grass snake	https://www.inaturalist.org/observations/132616596	2022/08/28 14:49	2022-08-28	2022-08-28 11:49:00 UTC	St. Petersburg	#N/A	open	false			2022-08-28 16:48:40 UTC	2022-08-30 21:41:32 UTC	research	CC-BY-NC
Natrix natrix	2022-08-28 18:38:00 +0300	52.4437	44.1975	grass snake	https://www.inaturalist.org/observations/132614351	2022-08-28 18:38:00	2022-08-28	2022-08-28 15:38:00 UTC	St. Petersburg	401	open	false	gps	gps	2022-08-28 16:39:12 UTC	2022-08-29 05:10:43 UTC	research	CC-BY-NC
Natrix natrix	2022-08-28 17:58:20 +0300	50.53	26.3741	grass snake	https://www.inaturalist.org/observations/132609273	2022-08-28 17:58:20	2022-08-28	2022-08-28 14:58:20 UTC	Kyiv	50	open	false	gps	gps	2022-08-28 16:19:09 UTC	2022-08-30 21:42:03 UTC	research
Natrix natrix	2022-08-26 16:14:00 +0200	47.6794	11.1921	grass snake	https://www.inaturalist.org/observations/132606875	2022/08/26 16:14	2022-08-26	2022-08-26 14:14:00 UTC	Berlin	5	open	false			2022-08-28 16:07:23 UTC	2022-08-28 16:19:12 UTC	research	CC-BY-NC
Natrix natrix	2016-05-09 10:04:00 +0200	60.072	10.8522	grass snake	https://www.inaturalist.org/observations/132599423	2016/05/09 10:04	2016-05-09	2016-05-09 08:04:00 UTC	Europe/Oslo	15	open	false			2022-08-28 15:33:31 UTC	2022-08-29 05:11:17 UTC	research	CC-BY-NC
Natrix natrix	2019-07-09 08:33:00 +0200	60.0676	10.8624	grass snake	https://www.inaturalist.org/observations/132598826	2019/07/09 08:33	2019-07-09	2019-07-09 06:33:00 UTC	Europe/Oslo	31	open	false			2022-08-28 15:30:53 UTC	2022-08-29 05:11:19 UTC	research	CC-BY-NC
Natrix natrix	2022-08-28 17:56:51 +0300	59.4009	24.381	grass snake	https://www.inaturalist.org/observations/132593258	2022-08-28 17:56:51	2022-08-28	2022-08-28 14:56:51 UTC	Tallinn	#N/A	open	false	gps	gps	2022-08-28 15:05:16 UTC	2022-08-29 05:11:25 UTC	research	CC-BY-NC
Natrix natrix	2022-08-28 15:51:54 +0200	48.4046	11.8412	grass snake	https://www.inaturalist.org/observations/132593158	2022-08-28 15:51:54	2022-08-28	2022-08-28 13:51:54 UTC	Berlin	4	open	false			2022-08-28 15:04:51 UTC	2022-08-29 16:08:20 UTC	research	CC-BY
Natrix natrix	2022-08-27 15:16:00 +0200	48.1045	15.5392	grass snake	https://www.inaturalist.org/observations/132584380	2022/08/27 3:16 PM	2022-08-27	2022-08-27 13:16:00 UTC	Vienna	31	open	false			2022-08-28 14:23:31 UTC	2022-08-29 05:11:37 UTC	research
Natrix natrix	2022-08-21 09:54:00 +0200	55.8058	12.5604	grass snake	https://www.inaturalist.org/observations/132580892	2022/08/21 9:54 AM	2022-08-21	2022-08-21 07:54:00 UTC	Copenhagen	8	open	false			2022-08-28 14:08:04 UTC	2022-08-28 14:43:53 UTC	research	CC-BY-NC
Natrix natrix	2022-08-28 15:28:34 +0300	56.2324	31.1928	grass snake	https://www.inaturalist.org/observations/132565488	2022-08-28 15:28:34+03:00	2022-08-28	2022-08-28 12:28:34 UTC	St. Petersburg	4	open	false			2022-08-28 12:53:01 UTC	2022-08-28 12:57:16 UTC	research
Natrix natrix	2022-08-27 15:22:29 +0300	51.1381	26.3154	grass snake	https://www.inaturalist.org/observations/132558572	2022-08-27 15:22:29	2022-08-27	2022-08-27 12:22:29 UTC	Kyiv	2577	open	false	gps	gps	2022-08-28 12:14:09 UTC	2022-09-18 15:07:09 UTC	research	CC-BY-NC
Natrix natrix	2022-08-28 13:25:00 +0300	56.5496	37.5612	grass snake	https://www.inaturalist.org/observations/132551152	2022/08/28 13:25	2022-08-28	2022-08-28 10:25:00 UTC	St. Petersburg	4	open	false			2022-08-28 11:28:53 UTC	2022-09-18 08:43:38 UTC	research	CC-BY-NC
Natrix natrix	2022-08-28 13:09:28 +0200	48.0696	15.8438	grass snake	https://www.inaturalist.org/observations/132548568	2022-08-28 13:09:28+02:00	2022-08-28	2022-08-28 11:09:28 UTC	Vienna	6	open	false			2022-08-28 11:13:47 UTC	2022-08-28 12:55:37 UTC	research	CC-BY-NC
Natrix natrix	2022-08-26 16:05:59 +0300	56.5478	37.5636	grass snake	https://www.inaturalist.org/observations/132547844	2022-08-26 16:05:59	2022-08-26	2022-08-26 13:05:59 UTC	St. Petersburg	27	open	false	gps	gps	2022-08-28 11:08:43 UTC	2022-09-02 05:21:02 UTC	research	CC-BY-NC
Natrix natrix	2022-06-18 16:37:33 +0200	50.7401	18.8835	grass snake	https://www.inaturalist.org/observations/132539917	2022-06-18 16:37:33	2022-06-18	2022-06-18 14:37:33 UTC	Warsaw	292	open	false	gps	gps	2022-08-28 10:13:29 UTC	2022-09-02 05:21:15 UTC	research
Natrix natrix	2022-08-27 14:27:35 +0200	59.0648	17.622	grass snake	https://www.inaturalist.org/observations/132536739	2022-08-27 14:27:35	2022-08-27	2022-08-27 12:27:35 UTC	Stockholm	#N/A	open	false	gps	gps	2022-08-28 09:48:21 UTC	2022-08-30 21:54:48 UTC	research	CC-BY-NC
Natrix natrix	2022-08-27 13:41:19 +0300	58.7005	37.1991	grass snake	https://www.inaturalist.org/observations/132536370	2022-08-27 13:41:19	2022-08-27	2022-08-27 10:41:19 UTC	St. Petersburg	#N/A	open	false	gps	gps	2022-08-28 09:45:45 UTC	2022-10-20 17:50:48 UTC	research	CC-BY-NC
Natrix natrix	2022-08-26 11:45:05 +0200	49.751	14.537	grass snake	https://www.inaturalist.org/observations/132536251	2022-08-26 11:45:05	2022-08-26	2022-08-26 09:45:05 UTC	Prague	64	open	false	gps	gps	2022-08-28 09:44:42 UTC	2022-09-02 05:21:22 UTC	research	CC-BY-NC
Natrix natrix	2022-08-28 10:29:47 +0200	47.0906	15.4906	grass snake	https://www.inaturalist.org/observations/132532692	2022-08-28 10:29:47	2022-08-28	2022-08-28 08:29:47 UTC	Vienna	#N/A	open	false	gps	gps	2022-08-28 09:17:14 UTC	2022-08-28 10:01:24 UTC	research
Natrix natrix	2022-08-28 10:23:51 +0200	48.1335	17.0121	grass snake	https://www.inaturalist.org/observations/132530458	2022-08-28 10:23:51+02:00	2022-08-28	2022-08-28 08:23:51 UTC	Vienna	87	open	false			2022-08-28 08:58:18 UTC	2022-08-30 21:58:07 UTC	research	CC-BY-NC
Natrix natrix	2022-08-27 17:06:41 +0200	55.1492	10.3926	grass snake	https://www.inaturalist.org/observations/132529916	2022-08-27 17:06:41	2022-08-27	2022-08-27 15:06:41 UTC	Copenhagen	86	open	false	gps	gps	2022-08-28 08:54:20 UTC	2022-08-28 08:57:31 UTC	research	CC-BY-NC
Natrix natrix	2022-08-25 15:07:25 +0300	54.0575	37.5308	grass snake	https://www.inaturalist.org/observations/132525929	2022-08-25 15:07:25	2022-08-25	2022-08-25 12:07:25 UTC	St. Petersburg	27	open	false	gps	gps	2022-08-28 08:23:48 UTC	2022-08-28 08:32:22 UTC	research	CC-BY-NC
Natrix natrix	2021-06-25 10:17:00 +0200	49.6045	18.8235	grass snake	https://www.inaturalist.org/observations/132525905	2021/06/25 10:17 AM	2021-06-25	2021-06-25 08:17:00 UTC	Warsaw	31	open	false			2022-08-28 08:23:34 UTC	2023-01-24 07:13:48 UTC	research	CC-BY-NC
Natrix natrix	2022-08-25 15:43:27 +0300	54.0697	37.5243	grass snake	https://www.inaturalist.org/observations/132525845	2022-08-25 15:43:27	2022-08-25	2022-08-25 12:43:27 UTC	St. Petersburg	397	open	false	gps	gps	2022-08-28 08:22:51 UTC	2022-08-30 21:59:26 UTC	research	CC-BY-NC
Natrix natrix	2022-08-25 17:03:05 +0300	54.0776	37.5255	grass snake	https://www.inaturalist.org/observations/132524950	2022-08-25 17:03:05	2022-08-25	2022-08-25 14:03:05 UTC	St. Petersburg	151	open	false	gps	gps	2022-08-28 08:16:15 UTC	2022-08-28 08:34:25 UTC	research	CC-BY-NC
Natrix natrix	2022-08-27 13:14:00 +0300	57.7301	39.7144	grass snake	https://www.inaturalist.org/observations/132503008	2022/08/27 13:14	2022-08-27	2022-08-27 10:14:00 UTC	St. Petersburg	31	open	false			2022-08-28 06:48:07 UTC	2022-08-28 07:29:36 UTC	research	CC-BY-NC
Natrix natrix	2015-05-11 15:46:00 +0200	52.5048	9.60618	grass snake	https://www.inaturalist.org/observations/132495775	2015/05/11 15:46	2015-05-11	2015-05-11 13:46:00 UTC	Berlin	276	open	false			2022-08-27 02:23:29 UTC	2022-08-28 07:01:44 UTC	research	CC-BY-NC
Natrix natrix	2022-08-26 14:07:18 +0200	51.3125	12.3562	grass snake	https://www.inaturalist.org/observations/132450037	2022-08-26 14:07:18	2022-08-26	2022-08-26 12:07:18 UTC	Berlin	111	open	false	gps	gps	2022-08-26 18:53:39 UTC	2022-08-28 08:22:57 UTC	research	CC-BY-NC
Natrix natrix	2022-08-23 15:36:00 +0200	54.8907	20.4635	grass snake	https://www.inaturalist.org/observations/132441859	2022/08/23 15:36	2022-08-23	2022-08-23 13:36:00 UTC	Kaliningrad	8	open	false			2022-08-26 17:49:55 UTC	2023-01-28 10:46:14 UTC	research	CC0
Natrix natrix	2022-08-26 17:34:05 +0200	49.4594	18.1208	grass snake	https://www.inaturalist.org/observations/132425800	2022-08-26 17:34:05	2022-08-26	2022-08-26 15:34:05 UTC	Prague	#N/A	open	false	gps	gps	2022-08-26 15:43:12 UTC	2022-08-26 16:36:25 UTC	research	CC-BY-NC
Natrix natrix	2022-08-26 16:13:19 +0200	47.7688	16.7665	grass snake	https://www.inaturalist.org/observations/132406273	2022-08-26 16:13:19	2022-08-26	2022-08-26 14:13:19 UTC	Vienna	#N/A	open	false	gps	gps	2022-08-26 14:14:37 UTC	2022-08-26 14:22:46 UTC	research	CC-BY-NC
Natrix natrix	2022-08-26 11:21:27 +0300	54.9557	28.7259	grass snake	https://www.inaturalist.org/observations/132406119	Fri Aug 26 2022 11:21:27 GMT +0300 (GMT+3)	2022-08-26	2022-08-26 08:21:27 UTC	Minsk	1817	open	false			2022-08-26 14:13:22 UTC	2022-08-26 19:11:10 UTC	research	CC0
Natrix natrix	2022-08-25 14:15:00 +0200	49.5666	21.3725	grass snake	https://www.inaturalist.org/observations/132388742	2022/08/25 2:15 PM	2022-08-25	2022-08-25 12:15:00 UTC	Warsaw	227	open	false			2022-08-26 11:01:22 UTC	2022-08-26 11:25:43 UTC	research	CC-BY-NC
Natrix natrix	2022-08-24 09:49:00 +0300	46.6408	37.7842	grass snake	https://www.inaturalist.org/observations/132387174	2022/08/24 09:49	2022-08-24	2022-08-24 06:49:00 UTC	St. Petersburg	15	open	false			2022-08-26 10:34:18 UTC	2022-08-26 10:36:05 UTC	research	CC-BY
Natrix natrix	2022-08-26 11:43:00 +0300	55.6947	37.7838	grass snake	https://www.inaturalist.org/observations/132384167	2022/08/26 11:43	2022-08-26	2022-08-26 08:43:00 UTC	St. Petersburg	#N/A	open	false			2022-08-26 09:34:10 UTC	2022-09-05 12:06:35 UTC	research	CC-BY-NC
Natrix natrix	2022-08-24 15:30:00 +0300	37.6977	24.9133	grass snake	https://www.inaturalist.org/observations/132382934	2022-08-24 15:30:00	2022-08-24	2022-08-24 12:30:00 UTC	Athens	28	open	true	gps	gps	2022-08-26 09:09:59 UTC	2022-09-10 05:32:36 UTC	research	CC-BY-NC
Natrix natrix	2022-08-26 09:41:39 +0200	51.4547	12.5775	grass snake	https://www.inaturalist.org/observations/132378356	Fri Aug 26 2022 09:41:39 GMT +0200 (GMT+2)	2022-08-26	2022-08-26 07:41:39 UTC	Berlin	69	open	false			2022-08-26 07:41:50 UTC	2022-08-26 11:52:10 UTC	research	CC-BY-NC
Natrix natrix	2022-08-25 00:00:00 +0100	50.2633	11.2634	grass snake	https://www.inaturalist.org/observations/132323288	2022-08-25	2022-08-25		Berlin	3	open	true	gps	gps	2022-08-25 20:40:06 UTC	2022-09-30 09:55:05 UTC	research
Natrix natrix	2017-10-07 10:28:00 +0300	59.8093	22.8947	grass snake	https://www.inaturalist.org/observations/132311634	2017/10/07 10:28 AM	2017-10-07	2017-10-07 07:28:00 UTC	Helsinki	#N/A	open	false			2022-08-25 19:07:00 UTC	2022-08-26 05:16:12 UTC	research	CC-BY-NC
Natrix natrix	2022-08-13 12:41:00 +0200	53.1668	13.6165	grass snake	https://www.inaturalist.org/observations/132304736	2022/08/13 12:41 PM	2022-08-13	2022-08-13 10:41:00 UTC	Berlin	#N/A	open	false			2022-08-25 18:11:34 UTC	2023-01-14 21:00:58 UTC	research
Natrix natrix	2022-08-17 12:51:01 +0300	55.8975	37.8232	grass snake	https://www.inaturalist.org/observations/132300339	2022-08-17 12:51:01+03:00	2022-08-17	2022-08-17 09:51:01 UTC	St. Petersburg	4	open	false			2022-08-25 17:32:35 UTC	2022-08-26 05:16:20 UTC	research
Natrix natrix	2022-08-25 19:17:48 +0200	48.7803	16.6873	grass snake	https://www.inaturalist.org/observations/132298687	2022-08-25 19:17:48+02:00	2022-08-25	2022-08-25 17:17:48 UTC	Prague	23	open	false			2022-08-25 17:18:49 UTC	2022-09-03 16:36:46 UTC	research	CC-BY-NC
Natrix natrix	2022-08-25 17:36:23 +0200	48.4439	18.9149	grass snake	https://www.inaturalist.org/observations/132285575	2022-08-25 17:36:23	2022-08-25	2022-08-25 15:36:23 UTC	Bratislava	181	open	false			2022-08-25 15:38:11 UTC	2022-10-06 09:33:30 UTC	research
Natrix natrix	2022-08-25 00:00:00 +0200	60.2138	23.7686	grass snake	https://www.inaturalist.org/observations/132282722	2022-08-25	2022-08-25		Helsinki	101	open	false	gps	gps	2022-08-25 15:15:44 UTC	2022-08-26 05:16:36 UTC	research
Natrix natrix moreotica	2022-08-23 17:44:18 +0300	40.6103	26.3889		https://www.inaturalist.org/observations/132281405	2022-08-23 17:44:18	2022-08-23	2022-08-23 14:44:18 UTC	Istanbul	151	open	false	gps	gps	2022-08-25 15:05:24 UTC	2022-09-12 12:30:47 UTC	research
Natrix natrix	2022-08-25 15:28:05 +0200	48.218	15.6446	grass snake	https://www.inaturalist.org/observations/132270398	2022-08-25 15:28:05	2022-08-25	2022-08-25 13:28:05 UTC	Vienna	#N/A	open	false	gps	gps	2022-08-25 13:34:16 UTC	2022-08-26 05:16:55 UTC	research
Natrix natrix	2022-08-25 14:20:48 +0200	55.7255	11.0862	grass snake	https://www.inaturalist.org/observations/132267527	2022-08-25 14:20:48+02:00	2022-08-25	2022-08-25 12:20:48 UTC	Copenhagen	4	open	false			2022-08-25 13:08:49 UTC	2022-08-25 16:20:58 UTC	research	CC-BY-NC
Natrix natrix	2022-08-25 07:49:30 +0200	48.5946	16.909	grass snake	https://www.inaturalist.org/observations/132246147	2022-08-25 07:49:30	2022-08-25	2022-08-25 05:49:30 UTC	Vienna	6	open	false	gps	gps	2022-08-25 07:28:13 UTC	2022-08-25 16:23:56 UTC	research	CC-BY-NC
Natrix natrix	2022-08-24 15:49:07 +0200	56.8275	9.84947	grass snake	https://www.inaturalist.org/observations/132146818	2022-08-24 15:49:07+02:00	2022-08-24	2022-08-24 13:49:07 UTC	Copenhagen	20	open	false			2022-08-24 15:06:38 UTC	2022-08-25 05:06:52 UTC	research	CC-BY-NC
Natrix natrix	2022-08-24 17:25:00 +0300	38.7689	22.9193	grass snake	https://www.inaturalist.org/observations/132143546	2022-08-24 17:25:00	2022-08-24	2022-08-24 14:25:00 UTC	Athens	#N/A	open	false	gps	gps	2022-08-24 14:39:07 UTC	2022-08-24 20:23:37 UTC	research	CC-BY-NC
Natrix natrix	2022-06-19 18:28:00 +0200	47.3095	15.3733	grass snake	https://www.inaturalist.org/observations/132130803	2022/06/19 18:28	2022-06-19	2022-06-19 16:28:00 UTC	Vienna	12	open	false			2022-08-24 12:42:40 UTC	2022-08-25 05:06:59 UTC	research	CC-BY-NC
Natrix natrix	2022-08-08 13:55:00 +0200	57.356	15.3407	grass snake	https://www.inaturalist.org/observations/132128912	2022/08/08 1:55 PM	2022-08-08	2022-08-08 11:55:00 UTC	Stockholm	277	open	false			2022-08-24 12:23:36 UTC	2022-08-25 05:07:05 UTC	research	CC-BY-NC
Natrix natrix	2022-08-24 10:01:02 +0200	48.177	16.5311	grass snake	https://www.inaturalist.org/observations/132128903	2022-08-24 10:01:02	2022-08-24	2022-08-24 08:01:02 UTC	Vienna	94	open	false	gps	gps	2022-08-24 12:23:27 UTC	2023-02-13 18:19:57 UTC	research	CC-BY
Natrix natrix	2022-08-24 10:36:07 +0200	48.1752	16.5292	grass snake	https://www.inaturalist.org/observations/132128846	2022-08-24 10:36:07	2022-08-24	2022-08-24 08:36:07 UTC	Vienna	24	open	false	gps	gps	2022-08-24 12:22:36 UTC	2023-02-13 18:19:57 UTC	research	CC-BY
Natrix natrix	2022-08-24 11:25:46 +0200	48.1793	16.5347	grass snake	https://www.inaturalist.org/observations/132128729	2022-08-24 11:25:46	2022-08-24	2022-08-24 09:25:46 UTC	Vienna	162	open	false	gps	gps	2022-08-24 12:20:45 UTC	2023-02-13 18:19:57 UTC	research	CC-BY
Natrix natrix	2022-08-24 14:01:14 +0200	52.4733	13.2417	grass snake	https://www.inaturalist.org/observations/132127158	2022-08-24 14:01:14	2022-08-24	2022-08-24 12:01:14 UTC	Berlin	699	open	false			2022-08-24 12:02:45 UTC	2022-08-25 05:07:40 UTC	research
Natrix natrix	2022-08-24 12:45:11 +0200	52.258	13.6426	grass snake	https://www.inaturalist.org/observations/132121850	2022-08-24 12:45:11	2022-08-24	2022-08-24 10:45:11 UTC	Berlin	#N/A	open	false	gps	gps	2022-08-24 10:47:37 UTC	2022-08-24 11:08:44 UTC	research	CC-BY-NC
Natrix natrix	2022-08-19 09:05:00 +0300	44.6882	29.0028	grass snake	https://www.inaturalist.org/observations/132040411	2022/08/19 09:05	2022-08-19	2022-08-19 06:05:00 UTC	Bucharest	4	open	false			2022-08-23 18:21:39 UTC	2022-08-24 05:08:36 UTC	research	CC-BY-SA
Natrix natrix	2022-08-23 16:09:00 +0300	56.1977	40.5583	grass snake	https://www.inaturalist.org/observations/132036162	2022/08/23 16:09	2022-08-23	2022-08-23 13:09:00 UTC	St. Petersburg	36	open	false			2022-08-23 17:50:30 UTC	2022-08-24 05:08:39 UTC	research	CC-BY-NC
Natrix natrix	2022-08-23 19:08:16 +0300	61.1065	27.596	grass snake	https://www.inaturalist.org/observations/132023480	2022-08-23 19:08:16	2022-08-23	2022-08-23 16:08:16 UTC	Helsinki	133	open	true	gps	gps	2022-08-23 16:12:39 UTC	2022-08-24 05:08:50 UTC	research	CC-BY-SA
Natrix natrix	2022-08-23 15:05:10 +0200	58.9213	11.9107	grass snake	https://www.inaturalist.org/observations/132021824	2022-08-23 15:05:10	2022-08-23	2022-08-23 13:05:10 UTC	Stockholm	64	open	false	gps	gps	2022-08-23 15:57:31 UTC	2022-08-24 05:08:55 UTC	research
Natrix natrix	2022-08-23 14:50:00 +0300	54.0583	37.502	grass snake	https://www.inaturalist.org/observations/132003247	2022-08-23 14:50:00	2022-08-23	2022-08-23 11:50:00 UTC	St. Petersburg	598	open	false	gps	gps	2022-08-23 13:13:28 UTC	2022-08-23 14:03:27 UTC	research
Natrix natrix	2022-08-23 13:22:30 +0200	54.9048	10.6093	grass snake	https://www.inaturalist.org/observations/131994130	2022-08-23 13:22:30+02:00	2022-08-23	2022-08-23 11:22:30 UTC	Copenhagen	7	open	false			2022-08-23 11:22:54 UTC	2022-08-24 05:09:29 UTC	research
Natrix natrix	2022-08-23 12:31:03 +0200	48.6499	10.674	grass snake	https://www.inaturalist.org/observations/131991612	2022-08-23 12:31:03	2022-08-23	2022-08-23 10:31:03 UTC	Berlin	#N/A	open	false	gps	gps	2022-08-23 10:33:02 UTC	2022-08-24 05:09:40 UTC	research	CC-BY-NC
Natrix natrix	2022-08-19 21:28:32 +0200	41.867	19.3487	grass snake	https://www.inaturalist.org/observations/131986364	2022-08-19 21:28:32	2022-08-19	2022-08-19 19:28:32 UTC	Europe/Podgorica	#N/A	open	false	gps	gps	2022-08-23 08:46:47 UTC	2022-10-15 20:35:45 UTC	research	CC-BY-NC
Natrix natrix	2022-08-23 08:17:00 +0300	54.2716	37.6043	grass snake	https://www.inaturalist.org/observations/131976726	2022/08/23 08:17	2022-08-23	2022-08-23 05:17:00 UTC	St. Petersburg	#N/A	open	false			2022-08-23 05:20:32 UTC	2022-08-24 05:09:32 UTC	research	CC-BY-NC
Natrix natrix	2022-08-22 16:17:27 +0200	48.6815	8.7269	grass snake	https://www.inaturalist.org/observations/131941140	2022-08-22 16:17:27	2022-08-22	2022-08-22 14:17:27 UTC	Berlin	4	open	false			2022-08-22 22:08:55 UTC	2022-08-22 22:22:32 UTC	research
Natrix natrix	2022-07-30 15:44:31 +0200	53.349	13.4344	grass snake	https://www.inaturalist.org/observations/131913173	2022-07-30 15:44:31+02:00	2022-07-30	2022-07-30 13:44:31 UTC	Berlin	13	open	false			2022-08-22 18:06:15 UTC	2022-08-23 11:03:27 UTC	research
Natrix natrix	2022-08-22 19:50:38 +0200	55.0745	10.4702	grass snake	https://www.inaturalist.org/observations/131911578	2022-08-22 19:50:38	2022-08-22	2022-08-22 17:50:38 UTC	Copenhagen	8	open	false			2022-08-22 17:52:30 UTC	2022-11-15 20:46:37 UTC	research
Natrix natrix	2022-08-22 18:30:32 +0200	50.6059	11.6484	grass snake	https://www.inaturalist.org/observations/131909135	2022-08-22 18:30:32	2022-08-22	2022-08-22 16:30:32 UTC	Berlin	#N/A	open	false	gps	gps	2022-08-22 17:29:25 UTC	2022-08-23 05:10:52 UTC	research
Natrix natrix	2022-08-22 14:34:09 +0200	59.4152	11.9501	grass snake	https://www.inaturalist.org/observations/131906405	2022-08-22 14:34:09+02:00	2022-08-22	2022-08-22 12:34:09 UTC	Stockholm	#N/A	open	false			2022-08-22 17:06:43 UTC	2022-08-23 05:11:03 UTC	research
Natrix natrix	2022-08-21 18:10:00 +0200	47.1831	16.2022	grass snake	https://www.inaturalist.org/observations/131904933	2022-08-21 18:10:00	2022-08-21	2022-08-21 16:10:00 UTC	Vienna	98	open	false	gps	gps	2022-08-22 16:55:02 UTC	2023-02-13 18:19:57 UTC	research	CC-BY
Natrix natrix	2022-08-20 13:51:33 +0200	47.534	19.0509	grass snake	https://www.inaturalist.org/observations/131902262	2022-08-20 13:51:33+02:00	2022-08-20	2022-08-20 11:51:33 UTC	Budapest	4	open	false			2022-08-22 16:32:46 UTC	2022-08-23 05:11:19 UTC	research
Natrix natrix	2022-08-21 13:30:51 +0200	51.6278	20.6955	grass snake	https://www.inaturalist.org/observations/131898865	2022-08-21 13:30:51+02:00	2022-08-21	2022-08-21 11:30:51 UTC	Warsaw	13	open	false			2022-08-22 16:02:07 UTC	2022-08-23 05:11:35 UTC	research	CC-BY-NC
Natrix natrix	2022-08-22 13:20:42 +0200	51.1345	12.3901	grass snake	https://www.inaturalist.org/observations/131896244	2022-08-22 13:20:42	2022-08-22	2022-08-22 11:20:42 UTC	Berlin	#N/A	open	false	gps	gps	2022-08-22 15:41:46 UTC	2022-08-23 05:11:41 UTC	research	CC-BY-NC
Natrix natrix	2022-08-22 10:06:18 +0200	51.1248	12.2008	grass snake	https://www.inaturalist.org/observations/131872630	2022-08-22 10:06:18+02:00	2022-08-22	2022-08-22 08:06:18 UTC	Berlin	113	open	true			2022-08-22 11:29:17 UTC	2022-08-23 05:11:46 UTC	research
Natrix natrix	2022-08-20 10:15:00 +0300	58.4552	37.3844	grass snake	https://www.inaturalist.org/observations/131871762	2022/08/20 10:15	2022-08-20	2022-08-20 07:15:00 UTC	St. Petersburg	8	open	false			2022-08-22 11:19:19 UTC	2022-08-22 11:28:03 UTC	research	CC-BY-NC
Natrix natrix		50.4634	30.545	grass snake	https://www.inaturalist.org/observations/131780721				Kyiv	1381	open	false	gps	gps	2022-08-21 19:29:40 UTC	2023-01-03 22:28:08 UTC	casual
Natrix natrix	2022-08-19 12:36:44 +0300	57.7959	42.9496	grass snake	https://www.inaturalist.org/observations/131776700	2022-08-19 12:36:44+03:00	2022-08-19	2022-08-19 09:36:44 UTC	St. Petersburg	4	open	false			2022-08-21 19:01:35 UTC	2022-08-22 05:12:05 UTC	research	CC-BY-NC
Natrix natrix	2022-08-19 08:57:00 +0300	54.9233	24.2157	grass snake	https://www.inaturalist.org/observations/131772949	2022/08/19 8:57 AM	2022-08-19	2022-08-19 05:57:00 UTC	Vilnius	31	open	false			2022-08-21 18:38:51 UTC	2022-08-22 07:54:14 UTC	research	CC-BY-NC
Natrix natrix	2022-08-21 13:37:32 +0200	59.1942	18.0847	grass snake	https://www.inaturalist.org/observations/131760565	2022-08-21 13:37:32	2022-08-21	2022-08-21 11:37:32 UTC	Stockholm	#N/A	open	false			2022-08-21 17:22:11 UTC	2022-08-22 05:12:11 UTC	research
Natrix natrix	2022-08-21 12:03:39 +0300	61.1426	27.5709	grass snake	https://www.inaturalist.org/observations/131749028	2022-08-21 12:03:39	2022-08-21	2022-08-21 09:03:39 UTC	Helsinki	133	open	true	gps	gps	2022-08-21 16:07:54 UTC	2022-08-26 18:42:46 UTC	research	CC-BY-SA
Natrix natrix	2022-08-21 13:15:10 +0300	47.4487	26.7624	grass snake	https://www.inaturalist.org/observations/131742985	2022-08-21 13:15:10	2022-08-21	2022-08-21 10:15:10 UTC	Bucharest	#N/A	open	false	gps	gps	2022-08-21 15:30:00 UTC	2022-08-29 10:01:30 UTC	needs_id	CC-BY-NC
Natrix natrix	2022-08-21 17:09:43 +0200	55.6991	11.0745	grass snake	https://www.inaturalist.org/observations/131740601	2022-08-21 17:09:43+02:00	2022-08-21	2022-08-21 15:09:43 UTC	Copenhagen	4	open	false			2022-08-21 15:11:51 UTC	2022-08-21 15:22:26 UTC	research	CC-BY-NC
Natrix natrix	2022-08-20 14:09:00 +0200	54.0754	11.9516	grass snake	https://www.inaturalist.org/observations/131737309	2022/08/20 14:09	2022-08-20	2022-08-20 12:09:00 UTC	Berlin	162	open	false			2022-08-21 14:52:10 UTC	2022-08-22 05:12:14 UTC	research
Natrix natrix	2022-08-21 12:13:14 +0200	55.2533	11.977	grass snake	https://www.inaturalist.org/observations/131735766	2022-08-21 12:13:14+02:00	2022-08-21	2022-08-21 10:13:14 UTC	Copenhagen	4	open	false			2022-08-21 14:40:22 UTC	2022-08-22 05:12:33 UTC	research
Natrix natrix	2022-08-21 15:49:46 +0200	57.3733	12.9244	grass snake	https://www.inaturalist.org/observations/131730154	2022-08-21 15:49:46+02:00	2022-08-21	2022-08-21 13:49:46 UTC	Stockholm	6	open	false			2022-08-21 13:58:22 UTC	2022-08-22 05:12:36 UTC	research
Natrix natrix	2022-08-03 18:14:00 +0200	46.8723	20.5285	grass snake	https://www.inaturalist.org/observations/131727877	2022/08/03 18:14	2022-08-03	2022-08-03 16:14:00 UTC	Budapest	4	open	false			2022-08-21 13:42:07 UTC	2022-08-21 14:07:27 UTC	research
Natrix natrix	2022-08-21 14:31:32 +0300	60.0304	23.6388	grass snake	https://www.inaturalist.org/observations/131727482	2022-08-21 14:31:32	2022-08-21	2022-08-21 11:31:32 UTC	Helsinki	231	open	false	gps	gps	2022-08-21 13:38:51 UTC	2022-08-22 05:12:42 UTC	research	CC-BY-NC
Natrix natrix	2010-09-23 13:52:00 +0200	51.8144	15.3867	grass snake	https://www.inaturalist.org/observations/131725822	2010/09/23 1:52 PM	2010-09-23	2010-09-23 11:52:00 UTC	Warsaw	12	open	false			2022-08-21 13:25:23 UTC	2022-12-27 19:57:35 UTC	research
Natrix natrix	2022-08-12 09:35:00 +0200	47.0378	18.0283	grass snake	https://www.inaturalist.org/observations/131722518	2022/08/12 9:35 AM	2022-08-12	2022-08-12 07:35:00 UTC	Budapest	8	open	true			2022-08-21 12:58:04 UTC	2022-08-21 14:12:13 UTC	research
Natrix natrix	2020-05-08 12:25:00 +0200	51.5642	15.7219	grass snake	https://www.inaturalist.org/observations/131717849	2020/05/08 12:25 PM	2020-05-08	2020-05-08 10:25:00 UTC	Warsaw	2	open	false			2022-08-21 12:14:22 UTC	2022-12-27 19:57:04 UTC	research
Natrix natrix	2022-08-21 11:27:56 +0200	56.0841	12.1622	grass snake	https://www.inaturalist.org/observations/131705225	2022-08-21 11:27:56+02:00	2022-08-21	2022-08-21 09:27:56 UTC	Copenhagen	5	open	false			2022-08-21 09:30:43 UTC	2022-08-25 05:08:09 UTC	research
Natrix natrix	2022-08-13 09:37:10 +0200	50.9531	13.8634	grass snake	https://www.inaturalist.org/observations/131700364	2022-08-13 09:37:10	2022-08-13	2022-08-13 07:37:10 UTC	Berlin	#N/A	open	false	gps	gps	2022-08-21 08:11:37 UTC	2022-08-24 11:12:12 UTC	research
Natrix natrix	2022-08-20 18:48:00 +0300	57.7176	39.7783	grass snake	https://www.inaturalist.org/observations/131695441	2022/08/20 18:48	2022-08-20	2022-08-20 15:48:00 UTC	St. Petersburg	3	open	false			2022-08-21 06:42:09 UTC	2022-08-21 14:17:18 UTC	research	CC-BY-NC
Natrix natrix	2022-08-18 10:00:00 +0200	48.2174	16.2858	grass snake	https://www.inaturalist.org/observations/131694720	2022-08-18 08:00:00Z	2022-08-18	2022-08-18 08:00:00 UTC	Vienna	68	open	false			2022-08-21 06:29:44 UTC	2022-08-23 12:30:26 UTC	research	CC-BY-NC
Natrix natrix	2022-08-20 22:37:00 +0300	45.2066	22.1204	grass snake	https://www.inaturalist.org/observations/131626950	2022/08/20 10:37 PM	2022-08-20	2022-08-20 19:37:00 UTC	Bucharest	31	open	false			2022-08-20 19:40:00 UTC	2022-08-20 23:28:10 UTC	research	CC-BY-NC
Natrix natrix	2022-08-20 18:43:07 +0200	56.6905	11.5374	grass snake	https://www.inaturalist.org/observations/131619316	2022-08-20 18:43:07	2022-08-20	2022-08-20 16:43:07 UTC	Copenhagen	#N/A	open	false	gps	gps	2022-08-20 18:44:55 UTC	2022-08-21 09:42:07 UTC	research	CC-BY-NC
Natrix natrix	2022-08-20 13:42:04 +0200	52.4306	15.82	grass snake	https://www.inaturalist.org/observations/131619306	2022-08-20 13:42:04	2022-08-20	2022-08-20 11:42:04 UTC	Warsaw	93	open	false	gps	gps	2022-08-20 18:44:51 UTC	2022-08-21 06:20:20 UTC	research	CC-BY-NC
Natrix natrix	2022-08-20 00:00:00 +0100	50.5907	12.2567	grass snake	https://www.inaturalist.org/observations/131617616	2022-08-20	2022-08-20		Berlin	49	open	false			2022-08-20 18:31:56 UTC	2022-08-20 23:31:54 UTC	research
Natrix natrix	2017-03-29 11:11:13 +0200	48.2839	16.8965	grass snake	https://www.inaturalist.org/observations/131592766	2017-03-29 11:11:13	2017-03-29	2017-03-29 09:11:13 UTC	Vienna	#N/A	open	false	gps	gps	2022-08-20 15:38:17 UTC	2022-08-21 19:56:21 UTC	research	CC-BY-NC
Natrix natrix	2022-08-14 14:38:00 +0200	43.8212	15.7773	grass snake	https://www.inaturalist.org/observations/131579162	2022/08/14 2:38 PM	2022-08-14	2022-08-14 12:38:00 UTC	Zagreb	2	open	false			2022-08-20 13:54:34 UTC	2023-02-11 20:26:45 UTC	research	CC-BY-NC
Natrix natrix	2022-08-14 14:37:00 +0200	43.8212	15.7773	grass snake	https://www.inaturalist.org/observations/131579159	2022/08/14 2:37 PM	2022-08-14	2022-08-14 12:37:00 UTC	Zagreb	2	open	false			2022-08-20 13:54:33 UTC	2023-02-11 20:26:44 UTC	research	CC-BY-NC
Natrix natrix	2022-07-25 22:46:00 +0200	43.8044	15.9655	grass snake	https://www.inaturalist.org/observations/131573974	2022/07/25 10:46 PM	2022-07-25	2022-07-25 20:46:00 UTC	Zagreb	197	open	false			2022-08-20 13:08:51 UTC	2023-02-11 20:26:43 UTC	research	CC-BY-NC
Natrix natrix	2022-08-20 13:04:48 +0200	55.2718	8.95407	grass snake	https://www.inaturalist.org/observations/131564255	2022-08-20 13:04:48	2022-08-20	2022-08-20 11:04:48 UTC	Copenhagen	4	open	false			2022-08-20 11:08:04 UTC	2022-08-20 17:58:54 UTC	research	CC-BY-NC
Natrix natrix	2022-08-20 12:42:17 +0300	54.3059	40.2169	grass snake	https://www.inaturalist.org/observations/131559135	2022-08-20 12:42:17	2022-08-20	2022-08-20 09:42:17 UTC	St. Petersburg	129	open	false	gps	gps	2022-08-20 09:51:21 UTC	2022-08-23 09:10:47 UTC	research
Natrix natrix	2022-08-17 11:15:01 +0200	49.9976	9.70982	grass snake	https://www.inaturalist.org/observations/131550154	2022-08-17 11:15:01+02:00	2022-08-17	2022-08-17 09:15:01 UTC	Berlin	1014	open	false			2022-08-20 07:14:29 UTC	2022-08-24 13:18:24 UTC	research	CC-BY-NC
Natrix natrix	2022-08-15 11:28:06 +0300	56.2971	27.503	grass snake	https://www.inaturalist.org/observations/131497987	2022-08-15 11:28:06	2022-08-15	2022-08-15 08:28:06 UTC	Riga	#N/A	open	false	gps	gps	2022-08-19 20:47:06 UTC	2022-08-22 17:21:29 UTC	research	CC0
Natrix natrix	2022-08-19 14:27:21 +0200	59.8245	18.2548	grass snake	https://www.inaturalist.org/observations/131476531	2022-08-19 14:27:21+02:00	2022-08-19	2022-08-19 12:27:21 UTC	Stockholm	19	open	false			2022-08-19 17:29:21 UTC	2022-09-12 11:37:32 UTC	research	CC-BY-NC
Natrix natrix	2022-08-17 16:25:22 +0300	56.9199	39.0459	grass snake	https://www.inaturalist.org/observations/131467892	2022-08-17 16:25:22+03:00	2022-08-17	2022-08-17 13:25:22 UTC	St. Petersburg	5	open	false			2022-08-19 16:08:56 UTC	2022-10-30 19:43:08 UTC	research	CC-BY
Natrix natrix	2022-08-19 17:31:00 +0300	50.3801	33.4343	grass snake	https://www.inaturalist.org/observations/131464486	2022/08/19 17:31	2022-08-19	2022-08-19 14:31:00 UTC	Kyiv	4	open	false			2022-08-19 15:39:30 UTC	2022-08-19 15:39:30 UTC	needs_id	CC-BY-NC
Natrix natrix	2022-07-21 12:34:00 +0200	52.6733	13.2183	grass snake	https://www.inaturalist.org/observations/131458868	2022/07/21 12:34	2022-07-21	2022-07-21 10:34:00 UTC	Berlin	150	open	true			2022-08-19 14:48:56 UTC	2022-08-19 23:25:29 UTC	research
Natrix natrix	2022-08-19 11:44:13 +0200	52.8627	20.6153	grass snake	https://www.inaturalist.org/observations/131456852	2022-08-19 11:44:13	2022-08-19	2022-08-19 09:44:13 UTC	Warsaw	333	open	false	gps	gps	2022-08-19 14:29:44 UTC	2022-09-05 20:51:46 UTC	research
Natrix natrix	2022-08-18 00:00:00 +0200	54.3542	24.3918	grass snake	https://www.inaturalist.org/observations/131454314	2022/08/18	2022-08-18		Vilnius	14	open	false			2022-08-19 14:04:21 UTC	2022-08-24 05:10:20 UTC	research	CC-BY-NC
Natrix natrix	2022-08-19 16:50:29 +0300	55.7757	37.7745	grass snake	https://www.inaturalist.org/observations/131454065	2022-08-19 16:50:29	2022-08-19	2022-08-19 13:50:29 UTC	St. Petersburg	9	open	false	gps	gps	2022-08-19 14:01:46 UTC	2022-08-20 13:35:55 UTC	research	CC-BY-NC
Natrix natrix	2022-08-18 16:57:00 +0200	52.6386	19.4004	grass snake	https://www.inaturalist.org/observations/131453018	2022/08/18 4:57 PM	2022-08-18	2022-08-18 14:57:00 UTC	Warsaw	244	open	false			2022-08-19 13:51:23 UTC	2022-08-19 19:20:26 UTC	research	CC-BY-NC
Natrix natrix	2022-08-19 15:15:59 +0200	57.669	12.0881	grass snake	https://www.inaturalist.org/observations/131449420	2022-08-19 15:15:59+02:00	2022-08-19	2022-08-19 13:15:59 UTC	Stockholm	138	open	false			2022-08-19 13:17:41 UTC	2022-08-19 19:22:40 UTC	research	CC-BY-NC
Natrix natrix		47.8057	13.2837	grass snake	https://www.inaturalist.org/observations/131440014				Vienna	7	open	false	gps	gps	2022-08-19 11:17:51 UTC	2022-08-19 11:17:58 UTC	casual
Natrix natrix	2022-08-19 11:43:13 +0200	55.7605	12.4118	grass snake	https://www.inaturalist.org/observations/131434099	2022-08-19 11:43:13	2022-08-19	2022-08-19 09:43:13 UTC	Copenhagen	82	open	false			2022-08-19 09:44:09 UTC	2022-08-19 20:46:06 UTC	research
Natrix natrix	2022-08-15 14:57:49 +0200	51.1001	18.6606	grass snake	https://www.inaturalist.org/observations/131428209	2022-08-15 14:57:49	2022-08-15	2022-08-15 12:57:49 UTC	Warsaw	290	open	false	gps	gps	2022-08-19 07:44:06 UTC	2022-08-19 10:06:11 UTC	research	CC0
Natrix natrix	2021-04-11 15:59:00 +0300	54.7581	25.2921	grass snake	https://www.inaturalist.org/observations/131386250	2021-04-11 15:59:00+03:00	2021-04-11	2021-04-11 12:59:00 UTC	Vilnius	217	open	false			2022-08-18 22:01:09 UTC	2022-08-19 06:01:30 UTC	research
Natrix natrix	2022-08-18 16:58:36 +0200	48.518	10.8104	grass snake	https://www.inaturalist.org/observations/131354567	2022-08-18 16:58:36	2022-08-18	2022-08-18 14:58:36 UTC	Berlin	4532	open	false	gps	gps	2022-08-18 17:30:49 UTC	2022-08-19 06:01:54 UTC	research
Natrix natrix	2022-08-18 19:07:04 +0200	52.0298	21.0167	grass snake	https://www.inaturalist.org/observations/131351631	2022-08-18 19:07:04	2022-08-18	2022-08-18 17:07:04 UTC	Warsaw	34	open	false			2022-08-18 17:07:34 UTC	2022-08-19 06:02:02 UTC	research
Natrix natrix	2022-08-14 16:14:00 +0200	44.3315	15.4747	grass snake	https://www.inaturalist.org/observations/131321005	2022/08/14 4:14 PM	2022-08-14	2022-08-14 14:14:00 UTC	Zagreb	#N/A	open	false			2022-08-18 12:17:11 UTC	2023-02-11 20:26:56 UTC	research
Natrix natrix	2022-08-18 13:35:50 +0200	56.026	12.5566	grass snake	https://www.inaturalist.org/observations/131318300	2022-08-18 13:35:50+02:00	2022-08-18	2022-08-18 11:35:50 UTC	Copenhagen	9	open	false			2022-08-18 11:36:42 UTC	2022-08-18 15:08:59 UTC	research	CC0
Natrix natrix	2022-08-18 13:55:02 +0300	60.4627	21.9988	grass snake	https://www.inaturalist.org/observations/131316409	2022-08-18 13:55:02	2022-08-18	2022-08-18 10:55:02 UTC	Helsinki	7	open	true	gps	gps	2022-08-18 11:07:33 UTC	2022-08-19 06:02:16 UTC	research	CC0
Natrix natrix	2022-08-18 08:23:37 +0200	48.1539	13.8641	grass snake	https://www.inaturalist.org/observations/131315553	2022-08-18 08:23:37+02:00	2022-08-18	2022-08-18 06:23:37 UTC	Vienna	4	open	false			2022-08-18 10:54:51 UTC	2022-08-18 12:28:42 UTC	research	CC-BY-NC
Natrix natrix	2022-08-18 13:50:27 +0300	57.9086	22.0554	grass snake	https://www.inaturalist.org/observations/131315348	2022-08-18 13:50:27+03:00	2022-08-18	2022-08-18 10:50:27 UTC	Tallinn	4	open	false			2022-08-18 10:51:22 UTC	2022-08-19 06:02:37 UTC	research	CC-BY-NC
Natrix natrix	2022-08-18 12:15:02 +0200	55.7789	12.34	grass snake	https://www.inaturalist.org/observations/131313250	2022-08-18 12:15:02	2022-08-18	2022-08-18 10:15:02 UTC	Copenhagen	6	open	false	gps	gps	2022-08-18 10:16:37 UTC	2022-08-19 06:04:42 UTC	research
Natrix natrix	2022-07-20 16:22:35 +0200	47.6063	12.8986	grass snake	https://www.inaturalist.org/observations/131306785	2022-07-20 16:22:35	2022-07-20	2022-07-20 14:22:35 UTC	Berlin	8	open	false			2022-08-18 08:12:51 UTC	2022-08-18 08:12:51 UTC	casual	CC-BY-NC
Natrix natrix	2022-08-17 20:11:32 +0300	55.9201	21.056	grass snake	https://www.inaturalist.org/observations/131252036	2022-08-17 20:11:32+03:00	2022-08-17	2022-08-17 17:11:32 UTC	Vilnius	20	open	false			2022-08-17 21:03:07 UTC	2022-08-18 05:08:21 UTC	research	CC-BY-NC
Natrix natrix	2022-08-17 16:05:09 +0200	47.6642	14.9891	grass snake	https://www.inaturalist.org/observations/131245119	2022-08-17 16:05:09	2022-08-17	2022-08-17 14:05:09 UTC	Vienna	#N/A	open	false	gps	gps	2022-08-17 20:06:51 UTC	2022-08-18 05:08:28 UTC	research
Natrix natrix	2022-08-07 14:08:00 +0200	49.7648	9.93075	grass snake	https://www.inaturalist.org/observations/131236665	2022/08/07 2:08 PM	2022-08-07	2022-08-07 12:08:00 UTC	Berlin	200	open	false			2022-08-17 18:58:51 UTC	2022-08-18 05:08:39 UTC	research
Natrix natrix	2022-08-17 15:56:29 +0300	52.0845	23.6706	grass snake	https://www.inaturalist.org/observations/131235985	2022-08-17 15:56:29	2022-08-17	2022-08-17 12:56:29 UTC	Minsk	#N/A	open	false	gps	gps	2022-08-17 18:53:53 UTC	2022-08-18 05:08:43 UTC	research	CC-BY-NC
Natrix natrix	2022-08-15 16:19:00 +0200	45.6798	11.2176	grass snake	https://www.inaturalist.org/observations/131233605	2022/08/15 16:19	2022-08-15	2022-08-15 14:19:00 UTC	Rome	#N/A	open	false			2022-08-17 18:36:01 UTC	2022-09-20 17:23:09 UTC	research	CC-BY-NC
Natrix natrix	2022-07-24 11:26:58 +0200	40.8807	20.9471	grass snake	https://www.inaturalist.org/observations/131219473	2022-07-24 11:26:58+02:00	2022-07-24	2022-07-24 09:26:58 UTC	Europe/Tirane	5	open	false			2022-08-17 16:42:04 UTC	2022-08-17 18:10:41 UTC	research	CC-BY-NC
Natrix natrix	2022-08-17 17:09:38 +0200	56.0355	9.72016	grass snake	https://www.inaturalist.org/observations/131207398	Wed Aug 17 2022 17:09:38 GMT +0200 (GMT+2)	2022-08-17	2022-08-17 15:09:38 UTC	Copenhagen	4046	open	false			2022-08-17 15:10:11 UTC	2022-08-19 06:26:32 UTC	research	CC-BY-NC
Natrix natrix	2022-08-12 15:20:54 +0300	55.3437	21.1952	grass snake	https://www.inaturalist.org/observations/131187512	2022-08-12 15:20:54+03:00	2022-08-12	2022-08-12 12:20:54 UTC	Vilnius	8	open	false			2022-08-17 12:04:33 UTC	2022-08-18 05:09:04 UTC	research	CC-BY-NC
Natrix natrix	2022-08-17 11:43:47 +0200	45.7668	14.3532	grass snake	https://www.inaturalist.org/observations/131185631	2022-08-17 11:43:47	2022-08-17	2022-08-17 09:43:47 UTC	Ljubljana	20	open	false	gps	gps	2022-08-17 11:46:41 UTC	2022-08-17 20:17:04 UTC	research	CC-BY-NC
Natrix natrix	2022-08-17 12:51:49 +0200	54.1303	22.1623	grass snake	https://www.inaturalist.org/observations/131184707	2022-08-17 12:51:49+02:00	2022-08-17	2022-08-17 10:51:49 UTC	Warsaw	4	open	false			2022-08-17 11:36:09 UTC	2022-08-17 17:47:20 UTC	research	CC-BY-NC
Natrix natrix	2022-08-17 14:30:19 +0400	41.6989	41.7179	grass snake	https://www.inaturalist.org/observations/131180793	2022-08-17 14:30:19+04:00	2022-08-17	2022-08-17 10:30:19 UTC	Tbilisi	31	open	false			2022-08-17 10:36:39 UTC	2022-08-18 04:49:34 UTC	research
Natrix natrix	2022-06-23 16:37:00 +0300	54.4344	23.5883	grass snake	https://www.inaturalist.org/observations/131172803	2022/06/23 4:37 PM	2022-06-23	2022-06-23 13:37:00 UTC	Vilnius	#N/A	open	false			2022-08-17 08:11:27 UTC	2022-08-18 05:09:21 UTC	research	CC-BY-NC
Natrix natrix	2022-08-17 09:00:18 +0200	50.9143	10.6971	grass snake	https://www.inaturalist.org/observations/131169718	2022-08-17 09:00:18+02:00	2022-08-17	2022-08-17 07:00:18 UTC	Berlin	4	open	false			2022-08-17 07:01:51 UTC	2022-08-17 17:51:24 UTC	research
Natrix natrix	2022-08-03 14:30:29 +0300	55.7533	27.1479	grass snake	https://www.inaturalist.org/observations/131169506	2022-08-03 14:30:29	2022-08-03	2022-08-03 11:30:29 UTC	Minsk	275	open	false	gps	gps	2022-08-17 06:57:10 UTC	2022-08-18 05:09:33 UTC	research
Natrix natrix	2022-07-27 10:36:11 +0300	48.7139	44.5358	grass snake	https://www.inaturalist.org/observations/131149663	2022-07-27 10:36:11	2022-07-27	2022-07-27 07:36:11 UTC	Volgograd	114	open	false	gps	gps	2022-08-17 01:58:50 UTC	2022-08-17 05:47:13 UTC	research	CC-BY-NC
Natrix natrix	2022-08-13 13:18:00 +0200	50.1016	15.1643	grass snake	https://www.inaturalist.org/observations/131108862	2022/08/13 13:18	2022-08-13	2022-08-13 11:18:00 UTC	Prague	61	open	false			2022-08-16 19:34:12 UTC	2022-08-17 07:30:36 UTC	research
Natrix natrix	2022-08-16 15:36:33 +0200	48.2569	16.2056	grass snake	https://www.inaturalist.org/observations/131108306	2022-08-16 15:36:33	2022-08-16	2022-08-16 13:36:33 UTC	Vienna	19	open	false	gps	gps	2022-08-16 19:29:28 UTC	2022-08-17 07:30:56 UTC	research	CC-BY-NC
Natrix natrix	2022-08-16 10:59:19 +0200	55.8751	12.3941	grass snake	https://www.inaturalist.org/observations/131085150	2022-08-16 10:59:19	2022-08-16	2022-08-16 08:59:19 UTC	Copenhagen	#N/A	open	false	gps	gps	2022-08-16 16:27:14 UTC	2022-08-17 05:47:27 UTC	research
Natrix natrix	2022-08-16 09:16:48 +0200	52.433	10.669	grass snake	https://www.inaturalist.org/observations/131083171	2022-08-16 09:16:48	2022-08-16	2022-08-16 07:16:48 UTC	Berlin	#N/A	open	false	gps	gps	2022-08-16 16:12:00 UTC	2022-08-17 05:47:42 UTC	research	CC-BY-NC
Natrix natrix	2022-08-16 16:53:16 +0200	50.9122	10.7028	grass snake	https://www.inaturalist.org/observations/131078610	2022-08-16 16:53:16+02:00	2022-08-16	2022-08-16 14:53:16 UTC	Berlin	4	open	false			2022-08-16 15:40:26 UTC	2022-08-17 15:30:51 UTC	research
Natrix natrix	2022-08-16 13:45:00 +0300	54.9089	25.5933	grass snake	https://www.inaturalist.org/observations/131076431	2022/08/16 1:45 PM	2022-08-16	2022-08-16 10:45:00 UTC	Vilnius	#N/A	open	false			2022-08-16 15:23:04 UTC	2022-08-17 09:26:49 UTC	research	CC-BY-NC
Natrix natrix	2022-08-16 15:18:42 +0200	56.1068	10.5113	grass snake	https://www.inaturalist.org/observations/131062932	2022-08-16 15:18:42+02:00	2022-08-16	2022-08-16 13:18:42 UTC	Copenhagen	5	open	false			2022-08-16 13:18:59 UTC	2022-08-17 05:47:55 UTC	research	CC-BY-NC
Natrix natrix	2022-08-16 13:09:24 +0300	60.1562	21.9083	grass snake	https://www.inaturalist.org/observations/131051815	2022-08-16 13:09:24	2022-08-16	2022-08-16 10:09:24 UTC	Helsinki	14	open	false	gps	gps	2022-08-16 10:48:32 UTC	2022-08-17 05:47:59 UTC	research	CC-BY-NC
Natrix natrix	2022-08-16 10:06:03 +0200	50.5965	11.5971	grass snake	https://www.inaturalist.org/observations/131044178	2022-08-16 10:06:03	2022-08-16	2022-08-16 08:06:03 UTC	Berlin	1966	open	false	gps	gps	2022-08-16 08:25:39 UTC	2022-08-16 09:35:45 UTC	research	CC-BY-NC
Natrix natrix	2022-08-15 19:07:40 +0200	54.458	19.9335	grass snake	https://www.inaturalist.org/observations/131037064	2022-08-15 19:07:40	2022-08-15	2022-08-15 17:07:40 UTC	Kaliningrad	95	open	false	gps	gps	2022-08-16 05:57:07 UTC	2022-08-16 09:36:43 UTC	research	CC-BY-NC
Natrix natrix	2022-08-16 07:13:40 +0200	48.316	16.355	grass snake	https://www.inaturalist.org/observations/131035111	2022-08-16 07:13:40+02:00	2022-08-16	2022-08-16 05:13:40 UTC	Vienna	10	open	false			2022-08-16 05:21:37 UTC	2022-08-16 09:15:08 UTC	research
Natrix natrix	2022-05-03 00:00:00 +0100	45.0382	15.9347	grass snake	https://www.inaturalist.org/observations/130972362	2022-05-03	2022-05-03		Sarajevo	358	open	true			2022-08-15 19:09:37 UTC	2022-10-15 20:38:02 UTC	research	CC-BY-NC
Natrix natrix	2022-08-15 14:33:23 +0200	48.289	16.3269	grass snake	https://www.inaturalist.org/observations/130957248	2022-08-15 14:33:23	2022-08-15	2022-08-15 12:33:23 UTC	Vienna	8	open	false	gps	gps	2022-08-15 17:04:40 UTC	2022-08-20 05:34:23 UTC	research	CC-BY-NC
Natrix natrix	2013-07-04 15:29:00 +0200	51.7542	9.36654	grass snake	https://www.inaturalist.org/observations/130939288	2013/07/04 15:29	2013-07-04	2013-07-04 13:29:00 UTC	Berlin	102	open	false			2022-08-15 14:48:35 UTC	2022-08-24 18:47:59 UTC	research	CC-BY-NC
Natrix natrix	2022-08-14 19:16:03 +0200	50.5464	11.7247	grass snake	https://www.inaturalist.org/observations/130933372	2022-08-14 19:16:03	2022-08-14	2022-08-14 17:16:03 UTC	Berlin	#N/A	open	false			2022-08-15 14:00:02 UTC	2022-08-16 15:37:17 UTC	research	CC-BY
Natrix natrix	2022-08-13 16:47:36 +0200	54.6812	21.7842	grass snake	https://www.inaturalist.org/observations/130921250	2022-08-13 16:47:36+02:00	2022-08-13	2022-08-13 14:47:36 UTC	Kaliningrad	5	open	false			2022-08-15 12:00:24 UTC	2022-08-16 05:12:40 UTC	research	CC-BY-NC
Natrix natrix	2022-08-08 16:17:00 +0200	50.4189	12.1482	grass snake	https://www.inaturalist.org/observations/130914908	2022/08/08 16:17	2022-08-08	2022-08-08 14:17:00 UTC	Berlin	8	open	false			2022-08-15 10:18:15 UTC	2022-08-15 12:58:43 UTC	research	CC-BY-NC
Natrix natrix	2022-08-14 14:06:00 +0300	55.8989	43.7067	grass snake	https://www.inaturalist.org/observations/130913080	2022/08/14 14:06	2022-08-14	2022-08-14 11:06:00 UTC	St. Petersburg	4	open	false			2022-08-15 09:42:31 UTC	2023-01-24 07:13:43 UTC	research	CC-BY-NC
Natrix natrix	2022-08-15 09:14:24 +0200	48.1351	12.6157	grass snake	https://www.inaturalist.org/observations/130908766	2022-08-15 09:14:24+02:00	2022-08-15	2022-08-15 07:14:24 UTC	Berlin	4	open	false			2022-08-15 08:20:19 UTC	2022-09-08 08:24:14 UTC	research	CC-BY-NC
Natrix natrix	2022-08-14 09:51:43 +0200	48.3001	16.3332	grass snake	https://www.inaturalist.org/observations/130905005	2022-08-14 09:51:43+02:00	2022-08-14	2022-08-14 07:51:43 UTC	Vienna	22	open	false			2022-08-15 07:13:29 UTC	2022-08-31 21:46:07 UTC	research	CC-BY-NC
Natrix natrix	2022-08-14 19:12:15 +0200	52.438	10.8019	grass snake	https://www.inaturalist.org/observations/130902691	2022-08-14 19:12:15	2022-08-14	2022-08-14 17:12:15 UTC	Berlin	#N/A	open	false	gps	gps	2022-08-15 06:30:45 UTC	2022-08-16 05:13:23 UTC	research	CC-BY-NC
Natrix natrix	2021-08-15 14:28:31 +0300	55.6362	37.4826	grass snake	https://www.inaturalist.org/observations/130899390	2021-08-15 14:28:31	2021-08-15	2021-08-15 11:28:31 UTC	St. Petersburg	#N/A	open	false			2022-08-15 05:28:07 UTC	2023-01-12 12:41:07 UTC	research	CC-BY
Natrix natrix	2022-08-03 21:38:00 +0300	55.8121	37.9012	grass snake	https://www.inaturalist.org/observations/130886433	2022/08/03 9:38 PM	2022-08-03	2022-08-03 18:38:00 UTC	St. Petersburg	4	open	false			2022-08-15 02:48:14 UTC	2022-08-16 05:13:30 UTC	research	CC-BY-NC
Natrix natrix	2022-07-25 14:15:00 +0300	43.6506	44.0968	grass snake	https://www.inaturalist.org/observations/130850941	2022-07-25 14:15:00+03:00	2022-07-25	2022-07-25 11:15:00 UTC	St. Petersburg	20	open	false			2022-08-14 21:49:13 UTC	2022-08-19 15:23:17 UTC	research	CC-BY-NC
Natrix natrix	2022-08-12 06:35:12 +0200	52.3944	14.634	grass snake	https://www.inaturalist.org/observations/130845374	2022-08-12 06:35:12	2022-08-12	2022-08-12 04:35:12 UTC	Warsaw	30	open	false	gps	gps	2022-08-14 21:09:02 UTC	2023-01-06 15:36:11 UTC	needs_id	CC-BY-NC
Natrix natrix	2022-08-14 18:40:54 +0200	54.2846	9.98356	grass snake	https://www.inaturalist.org/observations/130833653	2022-08-14 18:40:54	2022-08-14	2022-08-14 16:40:54 UTC	Berlin	#N/A	open	false	gps	gps	2022-08-14 19:49:35 UTC	2022-08-15 15:18:41 UTC	research	CC-BY-NC
Natrix natrix	2022-08-14 20:23:44 +0300	56.0436	23.9951	grass snake	https://www.inaturalist.org/observations/130816729	2022-08-14 20:23:44+03:00	2022-08-14	2022-08-14 17:23:44 UTC	Vilnius	#N/A	open	false			2022-08-14 18:07:00 UTC	2022-08-14 22:56:25 UTC	research	CC-BY-NC
Natrix natrix	2022-08-10 13:46:00 +0200	51.0757	13.003	grass snake	https://www.inaturalist.org/observations/130815557	2022-08-10 13:46:00	2022-08-10	2022-08-10 11:46:00 UTC	Berlin	6	open	false	gps	gps	2022-08-14 18:00:01 UTC	2022-08-14 22:57:15 UTC	research	CC-BY-NC
Natrix natrix	2018-10-07 12:49:02 +0200	50.7636	21.0104	grass snake	https://www.inaturalist.org/observations/130808900	2018-10-07 12:49:02	2018-10-07	2018-10-07 10:49:02 UTC	Warsaw	1376	open	false	gps	gps	2022-08-14 17:17:23 UTC	2022-08-14 17:17:46 UTC	research
Natrix natrix	2022-08-12 18:33:20 +0200	50.9535	12.8149	grass snake	https://www.inaturalist.org/observations/130800661	2022-08-12 18:33:20+02:00	2022-08-12	2022-08-12 16:33:20 UTC	Berlin	129	open	false			2022-08-14 16:26:08 UTC	2022-08-15 17:46:46 UTC	research	CC-BY-NC
Natrix natrix	2022-08-14 15:50:24 +0200	59.3328	17.6759	grass snake	https://www.inaturalist.org/observations/130778648	2022-08-14 15:50:24+02:00	2022-08-14	2022-08-14 13:50:24 UTC	Stockholm	5132	open	false			2022-08-14 13:54:50 UTC	2022-08-14 15:00:56 UTC	research	CC-BY-NC
Natrix natrix	2022-08-11 17:13:19 +0300	57.2453	39.505	grass snake	https://www.inaturalist.org/observations/130773861	2022-08-11 17:13:19+03:00	2022-08-11	2022-08-11 14:13:19 UTC	St. Petersburg	4	open	false			2022-08-14 13:12:40 UTC	2022-08-14 14:41:40 UTC	research	CC-BY-NC
Natrix natrix		59.5949	18.8023	grass snake	https://www.inaturalist.org/observations/130771820				Stockholm	416	open	false	gps	gps	2022-08-14 12:54:35 UTC	2022-08-14 12:54:59 UTC	casual	CC-BY-NC
Natrix natrix	2022-08-08 16:56:00 +0300	56.5012	29.669	grass snake	https://www.inaturalist.org/observations/130768086	2022/08/08 16:56	2022-08-08	2022-08-08 13:56:00 UTC	St. Petersburg	54	open	false			2022-08-14 12:17:56 UTC	2022-08-16 15:53:26 UTC	research	CC-BY-NC
Natrix natrix	2020-06-24 10:15:54 +0200	51.5989	12.3246	grass snake	https://www.inaturalist.org/observations/130766071	2020-06-24 10:15:54	2020-06-24	2020-06-24 08:15:54 UTC	Berlin	170	open	false	gps	gps	2022-08-14 11:57:42 UTC	2022-08-14 12:34:58 UTC	research	CC-BY-NC
Natrix natrix	2022-08-14 13:49:46 +0300	58.067	38.232	grass snake	https://www.inaturalist.org/observations/130764545	2022-08-14 13:49:46+03:00	2022-08-14	2022-08-14 10:49:46 UTC	St. Petersburg	4	open	false			2022-08-14 11:38:38 UTC	2022-09-01 05:55:40 UTC	research	CC-BY-NC
Natrix natrix	2022-08-14 12:42:22 +0300	55.7825	38.6561	grass snake	https://www.inaturalist.org/observations/130763560	Sun Aug 14 2022 12:42:22 GMT+0300 (GMT+3)	2022-08-14	2022-08-14 09:42:22 UTC	St. Petersburg	24	open	false			2022-08-14 11:28:37 UTC	2022-08-16 15:53:59 UTC	research	CC-BY-NC
Natrix natrix	2022-08-12 11:55:01 +0300	54.7498	37.2382	grass snake	https://www.inaturalist.org/observations/130756866	2022-08-12 11:55:01+03:00	2022-08-12	2022-08-12 08:55:01 UTC	St. Petersburg	25	open	false			2022-08-14 10:03:21 UTC	2022-08-14 11:42:11 UTC	research
Natrix natrix	2022-08-13 10:41:00 +0200	48.1633	11.4968	grass snake	https://www.inaturalist.org/observations/130752451	2022/08/13 10:41 AM	2022-08-13	2022-08-13 08:41:00 UTC	Berlin	8	open	false			2022-08-14 08:57:28 UTC	2022-08-19 06:06:45 UTC	research	CC-BY-NC
Natrix natrix	2022-08-13 18:08:30 +0200	43.3509	16.6249	grass snake	https://www.inaturalist.org/observations/130686774	2022-08-13 18:08:30	2022-08-13	2022-08-13 16:08:30 UTC	Zagreb	30	open	false	gps	gps	2022-08-13 21:09:09 UTC	2023-02-11 20:27:01 UTC	research	CC-BY-NC
Natrix natrix	2022-08-13 18:20:10 +0200	47.8397	14.4659	grass snake	https://www.inaturalist.org/observations/130675876	2022-08-13 18:20:10+02:00	2022-08-13	2022-08-13 16:20:10 UTC	Vienna	6	open	false			2022-08-13 19:54:10 UTC	2022-08-14 07:23:21 UTC	research
Natrix natrix	2022-08-13 15:18:00 +0200	49.9925	14.5662	grass snake	https://www.inaturalist.org/observations/130667224	2022/08/13 15:18	2022-08-13	2022-08-13 13:18:00 UTC	Prague	61	open	false			2022-08-13 18:53:19 UTC	2022-08-13 18:54:42 UTC	research	CC-BY-NC
Natrix natrix	2022-08-06 10:37:00 +0200	55.8058	12.5603	grass snake	https://www.inaturalist.org/observations/130660372	2022/08/06 10:37 AM	2022-08-06	2022-08-06 08:37:00 UTC	Copenhagen	19	open	false			2022-08-13 18:06:42 UTC	2022-08-13 18:55:11 UTC	research	CC-BY-NC
Natrix natrix	2017-08-16 00:00:00 +0100	47.1756	16.2079	grass snake	https://www.inaturalist.org/observations/130659789	2017-08-16	2017-08-16		Vienna	51	open	false	gps	gps	2022-08-13 18:02:00 UTC	2023-02-13 18:19:57 UTC	research	CC-BY
Natrix natrix	2022-05-15 08:06:26 +0200	47.1776	16.2082	grass snake	https://www.inaturalist.org/observations/130631288	2022-05-15 08:06:26	2022-05-15	2022-05-15 06:06:26 UTC	Vienna	138	open	false	gps	gps	2022-08-13 14:37:22 UTC	2023-02-13 18:19:57 UTC	research	CC-BY
Natrix natrix	2022-08-13 17:11:10 +0300	55.2132	25.6428	grass snake	https://www.inaturalist.org/observations/130628926	2022-08-13 17:11:10	2022-08-13	2022-08-13 14:11:10 UTC	Vilnius	32	open	false	gps	gps	2022-08-13 14:16:38 UTC	2022-08-13 15:48:40 UTC	research
Natrix natrix	2022-08-13 16:04:37 +0300	55.7431	37.4671	grass snake	https://www.inaturalist.org/observations/130624777	2022-08-13 16:04:37	2022-08-13	2022-08-13 13:04:37 UTC	St. Petersburg	#N/A	open	false			2022-08-13 13:39:06 UTC	2022-08-13 16:43:11 UTC	research	CC-BY-NC
Natrix natrix	2022-08-13 11:48:00 +0300	55.8809	41.7074	grass snake	https://www.inaturalist.org/observations/130621365	2022/08/13 11:48	2022-08-13	2022-08-13 08:48:00 UTC	St. Petersburg	122	open	false			2022-08-13 13:06:52 UTC	2022-08-19 06:06:49 UTC	research	CC-BY-NC
Natrix natrix	2022-08-13 10:12:00 +0200	52.2222	13.0263	grass snake	https://www.inaturalist.org/observations/130613980	2022/08/13 10:12	2022-08-13	2022-08-13 08:12:00 UTC	Berlin	#N/A	open	false			2022-08-13 11:47:22 UTC	2022-08-13 11:54:27 UTC	research
Natrix natrix	2022-08-12 18:39:19 +0300	55.6263	39.004	grass snake	https://www.inaturalist.org/observations/130612733	2022-08-12 18:39:19+03:00	2022-08-12	2022-08-12 15:39:19 UTC	St. Petersburg	19	open	false			2022-08-13 11:31:11 UTC	2022-08-13 19:26:46 UTC	research	CC-BY-NC
Natrix natrix	2022-08-13 13:26:35 +0200	52.1291	21.0429	grass snake	https://www.inaturalist.org/observations/130612510	2022-08-13 13:26:35+02:00	2022-08-13	2022-08-13 11:26:35 UTC	Warsaw	4	open	false			2022-08-13 11:28:14 UTC	2022-08-13 20:31:44 UTC	research	CC-BY-NC
Natrix natrix	2022-05-31 12:34:00 +0300	55.8274	42.3721	grass snake	https://www.inaturalist.org/observations/130594205	2022/05/31 12:34	2022-05-31	2022-05-31 09:34:00 UTC	St. Petersburg	3	open	false			2022-08-13 05:49:07 UTC	2022-12-11 14:04:47 UTC	research	CC-BY-NC
Natrix natrix	2022-05-31 11:52:00 +0300	55.8349	42.3898	grass snake	https://www.inaturalist.org/observations/130593932	2022/05/31 11:52	2022-05-31	2022-05-31 08:52:00 UTC	St. Petersburg	50	open	false			2022-08-13 05:42:36 UTC	2022-12-11 14:05:00 UTC	research	CC-BY-NC
Natrix natrix	2022-07-31 11:41:00 +0200	47.1777	16.2081	grass snake	https://www.inaturalist.org/observations/130593364	2022-07-31 11:41:00	2022-07-31	2022-07-31 09:41:00 UTC	Vienna	16	open	false	gps	gps	2022-08-13 05:29:28 UTC	2023-02-13 18:19:57 UTC	research	CC-BY
Natrix natrix	2022-05-30 17:17:00 +0300	55.9892	42.6619	grass snake	https://www.inaturalist.org/observations/130593275	2022/05/30 17:17	2022-05-30	2022-05-30 14:17:00 UTC	St. Petersburg	20	open	false			2022-08-13 05:27:18 UTC	2022-12-11 14:05:22 UTC	research	CC-BY-NC
Natrix natrix	2022-05-30 15:27:00 +0300	55.9941	42.7922	grass snake	https://www.inaturalist.org/observations/130592746	2022/05/30 15:27	2022-05-30	2022-05-30 12:27:00 UTC	St. Petersburg	3	open	false			2022-08-13 05:16:44 UTC	2022-12-11 14:05:38 UTC	research	CC-BY-NC
Natrix natrix	2022-08-07 10:45:00 +0200	51.4448	21.9769	grass snake	https://www.inaturalist.org/observations/130554683	2022/08/07 10:45	2022-08-07	2022-08-07 08:45:00 UTC	Warsaw	4	open	false			2022-08-12 22:03:27 UTC	2022-08-13 02:59:49 UTC	research	CC-BY-NC
Natrix natrix	2022-08-12 13:10:43 +0200	57.6752	11.9527	grass snake	https://www.inaturalist.org/observations/130542719	2022-08-12 13:10:43	2022-08-12	2022-08-12 11:10:43 UTC	Stockholm	#N/A	open	false	gps	gps	2022-08-12 20:27:00 UTC	2022-08-13 08:49:41 UTC	research
Natrix natrix	2022-08-12 17:37:00 +0300	55.4469	37.5031	grass snake	https://www.inaturalist.org/observations/130530640	2022/08/12 17:37	2022-08-12	2022-08-12 14:37:00 UTC	St. Petersburg	4	open	false			2022-08-12 18:45:16 UTC	2022-08-12 23:18:17 UTC	research	CC-BY-NC
Natrix natrix	2022-08-12 13:47:00 +0300	55.4558	37.5317	grass snake	https://www.inaturalist.org/observations/130530545	2022/08/12 13:47	2022-08-12	2022-08-12 10:47:00 UTC	St. Petersburg	25	open	false			2022-08-12 18:44:45 UTC	2022-08-13 05:36:32 UTC	research	CC-BY-NC
Natrix natrix	2022-08-12 15:05:56 +0200	41.3115	19.8227	grass snake	https://www.inaturalist.org/observations/130509263	2022-08-12 15:05:56	2022-08-12	2022-08-12 13:05:56 UTC	Europe/Tirane	242	open	false	gps	gps	2022-08-12 15:50:29 UTC	2022-08-12 18:09:47 UTC	research
Natrix natrix	2022-08-12 17:27:49 +0200	56.1267	9.92443	grass snake	https://www.inaturalist.org/observations/130506683	Fri Aug 12 2022 17:27:49 GMT+0200 (GMT+2)	2022-08-12	2022-08-12 15:27:49 UTC	Copenhagen	3	open	false			2022-08-12 15:28:14 UTC	2022-08-12 15:28:14 UTC	casual
Natrix natrix	2022-08-04 14:42:00 +0200	59.2825	18.1483	grass snake	https://www.inaturalist.org/observations/130496797	2022-08-04 14:42:00+02:00	2022-08-04	2022-08-04 12:42:00 UTC	Stockholm	25	open	false			2022-08-12 14:04:36 UTC	2022-10-24 15:56:09 UTC	research	CC-BY-NC
Natrix natrix	2022-08-12 16:35:40 +0300	60.4094	21.8098	grass snake	https://www.inaturalist.org/observations/130495596	2022-08-12 16:35:40	2022-08-12	2022-08-12 13:35:40 UTC	Helsinki	3	open	false			2022-08-12 13:52:41 UTC	2022-08-12 21:27:47 UTC	research	CC0
Natrix natrix	2022-08-12 13:44:42 +0200	48.7239	11.6607	grass snake	https://www.inaturalist.org/observations/130485744	2022-08-12 13:44:42	2022-08-12	2022-08-12 11:44:42 UTC	Berlin	8	open	false	gps	gps	2022-08-12 11:52:42 UTC	2022-08-12 12:08:58 UTC	research
Natrix natrix	2022-08-12 10:03:00 +0300	55.9445	38.0722	grass snake	https://www.inaturalist.org/observations/130479622	2022/08/12 10:03	2022-08-12	2022-08-12 07:03:00 UTC	St. Petersburg	500	open	false			2022-08-12 10:17:01 UTC	2022-08-22 13:37:45 UTC	research
Natrix natrix	2020-08-19 00:00:00 +0100	43.8255	15.9396	grass snake	https://www.inaturalist.org/observations/130479527	2020-08-19	2020-08-19		Zagreb	3280	open	false	gps	gps	2022-08-12 10:14:58 UTC	2023-02-11 20:27:18 UTC	research	CC-BY-NC
Natrix natrix	2022-08-06 13:31:13 +0200	48.4439	9.24811	grass snake	https://www.inaturalist.org/observations/130409391	2022-08-06 13:31:13	2022-08-06	2022-08-06 11:31:13 UTC	Berlin	#N/A	open	false	gps	gps	2022-08-11 19:01:09 UTC	2023-01-11 19:41:13 UTC	research	CC0
Natrix natrix	2005-08-18 12:03:00 +0200	52.4023	9.87069	grass snake	https://www.inaturalist.org/observations/130399515	2005/08/18 12:03	2005-08-18	2005-08-18 10:03:00 UTC	Berlin	4	open	false			2022-08-11 17:49:56 UTC	2022-08-11 18:48:55 UTC	research	CC-BY-NC
Natrix natrix	2022-08-01 12:21:45 +0300	41.199	23.2249	grass snake	https://www.inaturalist.org/observations/130398584	2022-08-01 12:21:45	2022-08-01	2022-08-01 09:21:45 UTC	Athens	#N/A	open	false			2022-08-11 17:42:16 UTC	2022-08-13 19:08:32 UTC	research	CC-BY
Natrix natrix	2022-08-11 14:28:27 +0300	54.4353	24.4425	grass snake	https://www.inaturalist.org/observations/130359904	2022-08-11 14:28:27	2022-08-11	2022-08-11 11:28:27 UTC	Vilnius	#N/A	open	false	gps	gps	2022-08-11 11:33:36 UTC	2022-08-11 11:36:08 UTC	research	CC-BY-NC
Natrix natrix	2022-08-11 11:25:12 +0200	59.377	17.7917	grass snake	https://www.inaturalist.org/observations/130352029	2022-08-11 11:25:12+02:00	2022-08-11	2022-08-11 09:25:12 UTC	Stockholm	4545	open	false			2022-08-11 09:28:05 UTC	2022-08-13 10:19:54 UTC	research	CC-BY-NC
Natrix natrix	2013-06-17 00:00:00 +0100	59.7662	10.0145	grass snake	https://www.inaturalist.org/observations/130341823	2013-06-17	2013-06-17		Europe/Oslo	478	open	false	gps	gps	2022-08-11 06:25:33 UTC	2022-08-15 17:43:22 UTC	research	CC-BY-SA
Natrix natrix	2019-07-20 18:29:00 +0200	55.0504	10.1524	grass snake	https://www.inaturalist.org/observations/130331490	2019/07/20 18:29	2019-07-20	2019-07-20 16:29:00 UTC	Copenhagen	122	open	false			2022-08-11 03:34:29 UTC	2023-02-16 11:06:19 UTC	research	CC0
Natrix natrix	1996-08-29 00:00:00 +0100	47.9252	9.87634	grass snake	https://www.inaturalist.org/observations/130325045	1996-08-29	1996-08-29		Berlin	1845	open	false			2022-08-11 02:13:08 UTC	2022-08-12 05:24:05 UTC	research	CC-BY-NC
Natrix natrix	2022-07-21 04:10:00 +0200	49.0704	22.5985	grass snake	https://www.inaturalist.org/observations/130284649	2022/07/21 4:10 AM	2022-07-21	2022-07-21 02:10:00 UTC	Warsaw	1370	open	true			2022-08-10 19:51:03 UTC	2022-08-28 20:55:07 UTC	research	CC-BY-NC
Natrix natrix	2022-07-20 03:06:00 +0200	49.3684	22.4893	grass snake	https://www.inaturalist.org/observations/130284457	2022/07/20 3:06 AM	2022-07-20	2022-07-20 01:06:00 UTC	Warsaw	298	open	true			2022-08-10 19:50:05 UTC	2022-08-11 15:48:54 UTC	research	CC-BY-NC
Natrix natrix	2021-06-30 10:10:08 +0200	47.7257	13.4394	grass snake	https://www.inaturalist.org/observations/130273555	2021-06-30 10:10:08+02:00	2021-06-30	2021-06-30 08:10:08 UTC	Vienna	71	open	false			2022-08-10 18:21:28 UTC	2022-08-11 05:14:00 UTC	research
Natrix natrix	2022-08-07 16:18:00 +0200	48.2412	11.3075	grass snake	https://www.inaturalist.org/observations/130273251	2022/08/07 16:18	2022-08-07	2022-08-07 14:18:00 UTC	Berlin	61	open	false			2022-08-10 18:19:09 UTC	2022-08-11 05:14:15 UTC	research	CC-BY-NC
Natrix natrix	2022-08-10 17:12:00 +0200	47.7988	13.3957	grass snake	https://www.inaturalist.org/observations/130272333	2022/08/10 17:12	2022-08-10	2022-08-10 15:12:00 UTC	Vienna	1457	open	false			2022-08-10 18:12:21 UTC	2022-08-11 05:14:41 UTC	research	CC-BY-NC
Natrix natrix	2022-07-07 13:16:47 +0300	53.7751	38.1399	grass snake	https://www.inaturalist.org/observations/130251900	2022-07-07 13:16:47	2022-07-07	2022-07-07 10:16:47 UTC	St. Petersburg	17	open	false	gps	gps	2022-08-10 15:32:52 UTC	2022-08-11 05:14:45 UTC	research	CC-BY
Natrix natrix	2022-08-10 13:10:00 +0200	44.4703	18.7234	grass snake	https://www.inaturalist.org/observations/130236089	2022-08-10 13:10:00	2022-08-10	2022-08-10 11:10:00 UTC	Sarajevo	4614	open	false	gps	gps	2022-08-10 13:11:47 UTC	2022-10-15 22:51:07 UTC	research	CC-BY-NC
Natrix natrix	2022-08-10 13:10:16 +0300	56.4972	44.8121	grass snake	https://www.inaturalist.org/observations/130225945	2022-08-10 13:10:16	2022-08-10	2022-08-10 10:10:16 UTC	St. Petersburg	223	open	false	gps	gps	2022-08-10 11:09:59 UTC	2022-08-11 05:14:57 UTC	research	CC-BY-NC
Natrix natrix	2022-06-05 15:16:00 +0300	51.7682	36.2357	grass snake	https://www.inaturalist.org/observations/130224757	2022/06/05 15:16	2022-06-05	2022-06-05 12:16:00 UTC	St. Petersburg	61	open	false			2022-08-10 10:55:15 UTC	2022-08-11 05:15:12 UTC	research	CC-BY-NC
Natrix natrix	2022-08-08 14:41:31 +0300	40.3892	28.4433	grass snake	https://www.inaturalist.org/observations/130169120	2022-08-08 14:41:31	2022-08-08	2022-08-08 11:41:31 UTC	Istanbul	#N/A	open	false	gps	gps	2022-08-09 22:10:17 UTC	2022-08-10 12:06:39 UTC	research
Natrix natrix	2022-08-09 19:11:12 +0200	47.6835	9.16012	grass snake	https://www.inaturalist.org/observations/130149780	2022-08-09 19:11:12+02:00	2022-08-09	2022-08-09 17:11:12 UTC	Zurich	5	obscured	true			2022-08-09 19:26:31 UTC	2022-08-22 18:11:31 UTC	research	CC-BY-NC
Natrix natrix	2022-08-07 12:59:08 +0200	47.7209	12.7214	grass snake	https://www.inaturalist.org/observations/130145139	2022-08-07 12:59:08	2022-08-07	2022-08-07 10:59:08 UTC	Berlin	82	open	false	gps	gps	2022-08-09 18:53:30 UTC	2022-09-08 08:34:41 UTC	research	CC-BY-NC
Natrix natrix	2022-08-04 11:45:00 +0300	50.4521	30.3476	grass snake	https://www.inaturalist.org/observations/130131558	2022/08/04 11:45	2022-08-04	2022-08-04 08:45:00 UTC	Kyiv	61	open	false			2022-08-09 17:12:51 UTC	2022-08-12 10:44:37 UTC	research	CC-BY-NC
Natrix natrix	2022-08-09 12:38:00 +0300	55.7907	37.4278	grass snake	https://www.inaturalist.org/observations/130125136	2022/08/09 12:38	2022-08-09	2022-08-09 09:38:00 UTC	St. Petersburg	31	open	false			2022-08-09 16:22:45 UTC	2022-08-11 15:02:20 UTC	research	CC-BY-NC
Natrix natrix	2022-07-30 18:08:00 +0300	53.2707	34.4109	grass snake	https://www.inaturalist.org/observations/130102388	2022-07-30 18:08:00	2022-07-30	2022-07-30 15:08:00 UTC	St. Petersburg	162	open	false	gps	gps	2022-08-09 13:07:15 UTC	2022-08-11 08:06:57 UTC	research	CC-BY-NC
Natrix natrix	2022-08-09 15:07:37 +0300	60.9987	26.4809	grass snake	https://www.inaturalist.org/observations/130097269	2022-08-09 15:07:37+03:00	2022-08-09	2022-08-09 12:07:37 UTC	Helsinki	79	open	false			2022-08-09 12:08:13 UTC	2022-08-10 05:17:54 UTC	research
Natrix natrix	2022-08-07 16:31:29 +0300	55.9081	21.0583	grass snake	https://www.inaturalist.org/observations/130096451	2022-08-07 16:31:29	2022-08-07	2022-08-07 13:31:29 UTC	Vilnius	12	open	false	gps	gps	2022-08-09 11:58:34 UTC	2022-08-10 05:18:18 UTC	research
Natrix natrix	2022-06-18 10:18:50 +0200	50.2777	15.8639	grass snake	https://www.inaturalist.org/observations/130082242	2022-06-18 10:18:50	2022-06-18	2022-06-18 08:18:50 UTC	Prague	9	open	false			2022-08-09 07:57:23 UTC	2022-08-10 05:18:39 UTC	research
Natrix natrix	2022-06-24 10:16:00 +0300	55.8364	37.2737	grass snake	https://www.inaturalist.org/observations/130047033	2022/06/24 10:16	2022-06-24	2022-06-24 07:16:00 UTC	St. Petersburg	#N/A	open	false			2022-08-08 23:41:33 UTC	2022-08-09 05:14:10 UTC	research	CC-BY-NC
Natrix natrix	2022-08-06 08:57:00 +0300	59.7722	28.1397	grass snake	https://www.inaturalist.org/observations/130018158	2022/08/06 08:57	2022-08-06	2022-08-06 05:57:00 UTC	St. Petersburg	61	open	false			2022-08-08 19:28:25 UTC	2022-08-09 00:19:59 UTC	research	CC-BY-NC
Natrix natrix	2022-08-06 10:27:00 +0300	49.8954	36.1975	grass snake	https://www.inaturalist.org/observations/129987712	2022/08/06 10:27	2022-08-06	2022-08-06 07:27:00 UTC	Kyiv	4	open	false			2022-08-08 15:31:34 UTC	2022-08-09 05:14:17 UTC	research	CC-BY-NC
Natrix natrix	2022-08-07 16:30:17 +0300	55.9078	21.0583	grass snake	https://www.inaturalist.org/observations/129979957	2022-08-07 16:30:17	2022-08-07	2022-08-07 13:30:17 UTC	Vilnius	#N/A	open	false	gps	gps	2022-08-08 14:29:16 UTC	2022-08-09 11:58:32 UTC	research
Natrix natrix	2022-08-07 16:33:00 +0200	48.4836	20.5447	grass snake	https://www.inaturalist.org/observations/129969190	2022/08/07 16:33	2022-08-07	2022-08-07 14:33:00 UTC	Budapest	31	open	false			2022-08-08 12:44:47 UTC	2022-08-09 05:14:37 UTC	research	CC-BY-NC
Natrix natrix	2022-08-08 13:48:56 +0200	54.9964	12.0167	grass snake	https://www.inaturalist.org/observations/129965054	2022-08-08 13:48:56	2022-08-08	2022-08-08 11:48:56 UTC	Copenhagen	#N/A	open	false	gps	gps	2022-08-08 11:53:28 UTC	2022-08-09 05:14:40 UTC	research
Natrix natrix	2022-08-08 14:06:18 +0300	43.6175	22.6892	grass snake	https://www.inaturalist.org/observations/129962127	2022-08-08 14:06:18	2022-08-08	2022-08-08 11:06:18 UTC	Sofia	8	open	false			2022-08-08 11:15:38 UTC	2022-08-12 04:46:05 UTC	research
Natrix natrix	2022-06-18 19:30:00 +0300	60.357	21.8356	grass snake	https://www.inaturalist.org/observations/129958553	2022-06-18 19:30:00	2022-06-18	2022-06-18 16:30:00 UTC	Helsinki	38	open	false	gps	gps	2022-08-08 10:16:05 UTC	2022-08-08 10:25:14 UTC	research	CC-BY-NC
Natrix natrix	2022-05-30 09:41:00 +0300	56.0999	42.638	grass snake	https://www.inaturalist.org/observations/129937604	2022/05/30 09:41	2022-05-30	2022-05-30 06:41:00 UTC	St. Petersburg	3	open	false			2022-08-08 04:19:17 UTC	2022-12-11 14:06:22 UTC	research	CC-BY-NC
Natrix natrix	2022-05-21 14:58:00 +0300	55.9187	42.43	grass snake	https://www.inaturalist.org/observations/129936355	2022/05/21 14:58	2022-05-21	2022-05-21 11:58:00 UTC	St. Petersburg	3	open	false			2022-08-08 04:02:28 UTC	2022-12-11 14:06:37 UTC	research	CC-BY-NC
Natrix natrix	2022-08-05 17:20:52 +0200	59.8862	10.8874	grass snake	https://www.inaturalist.org/observations/129847117	2022-08-05 17:20:52+02:00	2022-08-05	2022-08-05 15:20:52 UTC	Europe/Oslo	21	open	false			2022-08-07 16:41:00 UTC	2022-08-08 05:04:10 UTC	research
Natrix natrix	2022-08-06 23:41:54 +0300	56.0723	43.3389	grass snake	https://www.inaturalist.org/observations/129813887	2022-08-06 23:41:54+03:00	2022-08-06	2022-08-06 20:41:54 UTC	St. Petersburg	4	open	false			2022-08-07 12:49:47 UTC	2022-08-08 10:35:44 UTC	research	CC-BY
Natrix natrix	2022-08-07 14:21:15 +0200	51.0557	12.1315	grass snake	https://www.inaturalist.org/observations/129813052	2022-08-07 14:21:15	2022-08-07	2022-08-07 12:21:15 UTC	Berlin	9	open	false	gps	gps	2022-08-07 12:42:16 UTC	2022-08-08 05:04:38 UTC	research	CC-BY-NC
Natrix natrix	2022-08-02 18:25:48 +0200	48.6089	14.5555	grass snake	https://www.inaturalist.org/observations/129812174	2022-08-02 18:25:48+02:00	2022-08-02	2022-08-02 16:25:48 UTC	Prague	129	open	false			2022-08-07 12:33:15 UTC	2022-08-10 10:50:52 UTC	research	CC-BY-NC
Natrix natrix	2022-08-07 11:53:12 +0200	50.3272	15.8517	grass snake	https://www.inaturalist.org/observations/129805021	2022-08-07 11:53:12	2022-08-07	2022-08-07 09:53:12 UTC	Prague	#N/A	open	true	gps	gps	2022-08-07 11:11:47 UTC	2022-08-07 11:16:08 UTC	research
Natrix natrix	2022-08-07 12:03:00 +0200	50.2788	15.8785	grass snake	https://www.inaturalist.org/observations/129799990	2022-08-07 12:03:00	2022-08-07	2022-08-07 10:03:00 UTC	Prague	330	open	false	gps	gps	2022-08-07 10:04:40 UTC	2022-08-08 05:04:47 UTC	research
Natrix natrix	2022-08-07 11:53:14 +0200	50.3865	15.8157	grass snake	https://www.inaturalist.org/observations/129799829	2022-08-07 11:53:14	2022-08-07	2022-08-07 09:53:14 UTC	Prague	#N/A	open	true	gps	gps	2022-08-07 10:02:37 UTC	2022-08-07 10:10:12 UTC	research
Natrix natrix	2022-08-07 11:21:13 +0200	58.9647	18.0661	grass snake	https://www.inaturalist.org/observations/129799753	2022-08-07 11:21:13+02:00	2022-08-07	2022-08-07 09:21:13 UTC	Stockholm	4	open	false			2022-08-07 10:00:54 UTC	2022-08-08 05:04:53 UTC	research	CC-BY-NC
Natrix natrix	2022-07-30 11:45:00 +0300	59.9718	24.4127	grass snake	https://www.inaturalist.org/observations/129794507	2022-07-30 11:45:00	2022-07-30	2022-07-30 08:45:00 UTC	Helsinki	5289	open	false	gps	gps	2022-08-07 08:46:00 UTC	2022-08-07 09:14:42 UTC	research	CC-BY-NC
Natrix natrix		58.0362	12.0349	grass snake	https://www.inaturalist.org/observations/129716633				Stockholm	6729	open	false	gps	gps	2022-08-06 19:11:49 UTC	2022-08-06 19:12:19 UTC	casual	CC-BY-NC
Natrix natrix	2022-07-31 11:20:23 +0300	55.9009	37.7816	grass snake	https://www.inaturalist.org/observations/129696656	2022-07-31 11:20:23	2022-07-31	2022-07-31 08:20:23 UTC	St. Petersburg	#N/A	open	false	gps	gps	2022-08-06 16:46:32 UTC	2022-08-06 20:16:39 UTC	research	CC-BY-NC-SA
Natrix natrix	2022-07-31 11:20:23 +0300	55.9009	37.7816	grass snake	https://www.inaturalist.org/observations/129696526	2022-07-31 11:20:23	2022-07-31	2022-07-31 08:20:23 UTC	St. Petersburg	#N/A	open	false			2022-08-06 16:45:48 UTC	2023-02-17 08:10:55 UTC	needs_id	CC-BY-NC-SA
Natrix natrix	2022-08-06 17:22:15 +0200	44.9053	20.2609	grass snake	https://www.inaturalist.org/observations/129693541	2022-08-06 17:22:15	2022-08-06	2022-08-06 15:22:15 UTC	Belgrade	183	open	false	gps	gps	2022-08-06 16:25:27 UTC	2022-08-18 16:05:28 UTC	research	CC-BY-NC
Natrix natrix	2022-05-14 11:07:00 +0200	50.9172	13.0395	grass snake	https://www.inaturalist.org/observations/129683807	2022/05/14 11:07	2022-05-14	2022-05-14 09:07:00 UTC	Berlin	23445	open	false			2022-08-06 15:19:38 UTC	2022-12-26 13:13:40 UTC	research	CC-BY-NC
Natrix natrix	2022-07-24 15:09:00 +0300	52.6573	39.8254	grass snake	https://www.inaturalist.org/observations/129679707	2022/07/24 15:09	2022-07-24	2022-07-24 12:09:00 UTC	St. Petersburg	8	open	false			2022-08-06 14:50:45 UTC	2022-08-06 17:07:39 UTC	research	CC-BY-NC
Natrix natrix	2022-07-30 15:45:26 +0300	56.5514	36.4476	grass snake	https://www.inaturalist.org/observations/129648471	2022-07-30 15:45:26+03:00	2022-07-30	2022-07-30 12:45:26 UTC	St. Petersburg	3	open	false			2022-08-06 09:02:42 UTC	2022-08-06 09:49:03 UTC	research
Natrix natrix	2022-08-06 11:23:15 +0300	54.9522	28.803	grass snake	https://www.inaturalist.org/observations/129646649	2022-08-06 11:23:15	2022-08-06	2022-08-06 08:23:15 UTC	Minsk	4	open	false			2022-08-06 08:24:25 UTC	2022-08-06 09:51:08 UTC	research	CC-BY-NC
Natrix natrix	2022-08-06 10:15:37 +0200	55.9746	12.5365	grass snake	https://www.inaturalist.org/observations/129646264	2022-08-06 10:15:37+02:00	2022-08-06	2022-08-06 08:15:37 UTC	Copenhagen	8	open	false			2022-08-06 08:16:09 UTC	2022-08-06 09:51:54 UTC	research
Natrix natrix	2022-06-30 10:56:00 +0300	57.4957	41.2332	grass snake	https://www.inaturalist.org/observations/129637783	2022/06/30 10:56	2022-06-30	2022-06-30 07:56:00 UTC	St. Petersburg	31	open	false			2022-08-06 05:33:31 UTC	2022-08-10 05:19:29 UTC	research	CC-BY-NC
Natrix natrix	2022-05-03 11:51:00 +0200	49.4226	22.6926	grass snake	https://www.inaturalist.org/observations/129595770	2022/05/03 11:51	2022-05-03	2022-05-03 09:51:00 UTC	Warsaw	#N/A	open	false			2022-08-05 21:45:12 UTC	2022-08-28 20:56:34 UTC	research	CC-BY-NC
Natrix natrix	2022-08-05 13:38:44 +0200	45.7868	18.19	grass snake	https://www.inaturalist.org/observations/129595747	2022-08-05 13:38:44	2022-08-05	2022-08-05 11:38:44 UTC	Zagreb	3	open	false	gps	gps	2022-08-05 21:44:59 UTC	2023-02-11 20:27:26 UTC	research
Natrix natrix	2022-08-03 00:00:00 +0100	49.6419	16.7229	grass snake	https://www.inaturalist.org/observations/129594698	2022/08/03	2022-08-03		Prague	15	open	false			2022-08-05 21:34:53 UTC	2022-08-06 18:49:41 UTC	research
Natrix natrix	2022-07-23 10:49:00 +0300	60.2085	21.6068	grass snake	https://www.inaturalist.org/observations/129587926	2022/07/23 10:49	2022-07-23	2022-07-23 07:49:00 UTC	Helsinki	#N/A	open	false			2022-08-05 20:38:25 UTC	2022-08-12 05:25:22 UTC	research	CC-BY-NC
Natrix natrix	2022-08-05 20:01:00 +0300	56.099	44.1937	grass snake	https://www.inaturalist.org/observations/129585573	2022/08/05 20:01	2022-08-05	2022-08-05 17:01:00 UTC	St. Petersburg	15	open	false			2022-08-05 20:16:37 UTC	2022-08-06 04:39:13 UTC	research	CC-BY-NC
Natrix natrix	2022-07-08 08:48:00 +0300	53.8537	30.2928	grass snake	https://www.inaturalist.org/observations/129570897	2022/07/08 08:48	2022-07-08	2022-07-08 05:48:00 UTC	Minsk	4	open	false			2022-08-05 18:10:42 UTC	2022-08-12 05:25:28 UTC	research	CC-BY-NC
Natrix natrix	2022-08-05 16:51:45 +0200	50.0961	17.7165	grass snake	https://www.inaturalist.org/observations/129557004	2022-08-05 16:51:45	2022-08-05	2022-08-05 14:51:45 UTC	Prague	#N/A	open	false	gps	gps	2022-08-05 16:15:37 UTC	2022-08-12 05:25:49 UTC	research
Natrix natrix	2022-07-30 00:00:00 +0200	47.6543	34.6095	grass snake	https://www.inaturalist.org/observations/129542828	2022/07/30	2022-07-30		Kyiv	14	open	false			2022-08-05 14:14:07 UTC	2022-08-12 05:25:53 UTC	research	CC-BY-NC
Natrix natrix	2022-08-03 14:16:00 +0300	46.6347	26.9721	grass snake	https://www.inaturalist.org/observations/129528597	2022/08/03 2:16 PM	2022-08-03	2022-08-03 11:16:00 UTC	Bucharest	31	open	false			2022-08-05 11:43:15 UTC	2022-08-12 05:25:57 UTC	research
Natrix natrix	2022-08-01 13:27:13 +0300	41.1991	23.2248	grass snake	https://www.inaturalist.org/observations/129525515	2022-08-01 13:27:13	2022-08-01	2022-08-01 10:27:13 UTC	Athens	#N/A	open	false	gps	gps	2022-08-05 10:54:46 UTC	2022-08-06 05:36:40 UTC	research
Natrix natrix	2022-08-03 17:13:00 +0200	50.5428	14.0088	grass snake	https://www.inaturalist.org/observations/129512485	2022/08/03 17:13	2022-08-03	2022-08-03 15:13:00 UTC	Prague	8	open	false			2022-08-05 06:47:15 UTC	2022-08-12 05:26:07 UTC	research	CC-BY-NC
Natrix natrix	2022-08-04 20:38:26 +0300	56.2066	43.3863	grass snake	https://www.inaturalist.org/observations/129490800	2022-08-04 20:38:26+03:00	2022-08-04	2022-08-04 17:38:26 UTC	St. Petersburg	3	open	false			2022-08-05 01:53:48 UTC	2022-08-05 05:20:43 UTC	research	CC-BY
Natrix natrix	2022-05-14 15:56:31 +0300	60.1966	25.1668	grass snake	https://www.inaturalist.org/observations/129468889	2022-05-14 15:56:31	2022-05-14	2022-05-14 12:56:31 UTC	Helsinki	683	open	false	gps	gps	2022-08-04 22:07:26 UTC	2022-08-05 05:20:47 UTC	research	CC-BY-NC
Natrix natrix	2022-07-22 17:52:51 +0200	52.5287	18.6536	grass snake	https://www.inaturalist.org/observations/129468640	2022-07-22 17:52:51+02:00	2022-07-22	2022-07-22 15:52:51 UTC	Warsaw	22	open	false			2022-08-04 22:05:23 UTC	2022-08-05 05:20:58 UTC	research	CC-BY-NC
Natrix natrix	2022-08-04 15:19:00 +0300	43.4011	39.9688	grass snake	https://www.inaturalist.org/observations/129462127	2022/08/04 15:19	2022-08-04	2022-08-04 12:19:00 UTC	St. Petersburg	#N/A	open	false			2022-08-04 21:11:42 UTC	2022-11-15 09:43:44 UTC	needs_id	CC-BY
Natrix natrix	2022-08-03 14:34:00 +0200	48.6694	11.5174	grass snake	https://www.inaturalist.org/observations/129450909	2022/08/03 14:34	2022-08-03	2022-08-03 12:34:00 UTC	Berlin	114	open	false			2022-08-04 19:38:53 UTC	2022-08-05 10:09:10 UTC	research	CC-BY-NC
Natrix natrix	2022-07-23 16:37:53 +0200	41.0137	19.4743	grass snake	https://www.inaturalist.org/observations/129428831	2022-07-23 16:37:53+02:00	2022-07-23	2022-07-23 14:37:53 UTC	Europe/Tirane	20	open	false			2022-08-04 16:50:12 UTC	2022-08-04 20:06:41 UTC	research	CC-BY-NC
Natrix natrix	2022-08-04 16:35:19 +0300	60.4877	26.7448	grass snake	https://www.inaturalist.org/observations/129407843	2022-08-04 16:35:19	2022-08-04	2022-08-04 13:35:19 UTC	Helsinki	#N/A	open	false	gps	gps	2022-08-04 13:48:07 UTC	2022-08-06 15:02:45 UTC	research	CC-BY-NC
Natrix natrix	2022-08-04 10:20:10 +0300	58.3749	27.5266	grass snake	https://www.inaturalist.org/observations/129396856	2022-08-04 10:20:10+03:00	2022-08-04	2022-08-04 07:20:10 UTC	Tallinn	4	open	false			2022-08-04 11:42:25 UTC	2022-08-04 11:47:08 UTC	research	CC-BY-NC
Natrix natrix	2022-08-03 12:34:00 +0300	50.234	28.6003	grass snake	https://www.inaturalist.org/observations/129393804	2022/08/03 12:34	2022-08-03	2022-08-03 09:34:00 UTC	Kyiv	4	open	false			2022-08-04 10:52:26 UTC	2022-08-05 05:21:57 UTC	research	CC-BY-NC
Natrix natrix	2022-08-04 09:47:22 +0200	52.514	12.9347	grass snake	https://www.inaturalist.org/observations/129384365	2022-08-04 09:47:22	2022-08-04	2022-08-04 07:47:22 UTC	Berlin	87	open	false			2022-08-04 07:49:13 UTC	2022-08-05 05:22:01 UTC	research	CC-BY-NC
Natrix natrix	2022-05-08 12:39:00 +0300	56.0837	42.678	grass snake	https://www.inaturalist.org/observations/129380345	2022/05/08 12:39	2022-05-08	2022-05-08 09:39:00 UTC	St. Petersburg	3	open	false			2022-08-04 06:24:26 UTC	2022-08-05 05:22:05 UTC	research	CC-BY-NC
Natrix natrix	2022-05-08 12:21:00 +0300	56.1022	42.6626	grass snake	https://www.inaturalist.org/observations/129380328	2022/05/08 12:21	2022-05-08	2022-05-08 09:21:00 UTC	St. Petersburg	3	open	false			2022-08-04 06:24:03 UTC	2022-08-05 05:22:09 UTC	research	CC-BY-NC
Natrix natrix	2022-05-08 11:45:00 +0300	56.1113	42.4971	grass snake	https://www.inaturalist.org/observations/129379934	2022/05/08 11:45	2022-05-08	2022-05-08 08:45:00 UTC	St. Petersburg	3	open	false			2022-08-04 06:17:09 UTC	2022-08-06 05:15:48 UTC	research	CC-BY-NC
Natrix natrix	2022-05-07 16:23:00 +0300	55.989	42.6706	grass snake	https://www.inaturalist.org/observations/129379327	2022/05/07 16:23	2022-05-07	2022-05-07 13:23:00 UTC	St. Petersburg	3	open	false			2022-08-04 06:06:15 UTC	2022-08-06 05:15:58 UTC	research	CC-BY-NC
Natrix natrix	2022-05-07 15:56:00 +0300	55.9875	42.6878	grass snake	https://www.inaturalist.org/observations/129379289	2022/05/07 15:56	2022-05-07	2022-05-07 12:56:00 UTC	St. Petersburg	3	open	false			2022-08-04 06:05:26 UTC	2022-08-06 05:16:10 UTC	research	CC-BY-NC
Natrix natrix	2022-05-07 14:10:00 +0300	55.988	42.6889	grass snake	https://www.inaturalist.org/observations/129377989	2022/05/07 14:10	2022-05-07	2022-05-07 11:10:00 UTC	St. Petersburg	10	open	false			2022-08-04 05:39:38 UTC	2022-08-09 05:16:02 UTC	research	CC-BY-NC
Natrix natrix	2022-08-03 16:17:00 +0200	48.1221	16.2346	grass snake	https://www.inaturalist.org/observations/129340227	2022/08/03 4:17 PM	2022-08-03	2022-08-03 14:17:00 UTC	Vienna	#N/A	open	false			2022-08-03 22:51:30 UTC	2022-08-04 23:06:23 UTC	research	CC0
Natrix natrix	2019-08-24 16:17:52 +0300	55.8916	37.924	grass snake	https://www.inaturalist.org/observations/129312858	2019-08-24 16:17:52+03:00	2019-08-24	2019-08-24 13:17:52 UTC	St. Petersburg	16	open	false			2022-08-03 19:00:35 UTC	2022-08-04 05:12:43 UTC	research	CC-BY-NC
Natrix natrix	2022-08-03 20:36:27 +0200	51.435	12.0181	grass snake	https://www.inaturalist.org/observations/129310341	2022-08-03 20:36:27	2022-08-03	2022-08-03 18:36:27 UTC	Berlin	7	open	false			2022-08-03 18:39:28 UTC	2022-08-04 05:12:51 UTC	research
Natrix natrix	2022-08-03 15:02:00 +0300	57.6466	39.9336	grass snake	https://www.inaturalist.org/observations/129283337	2022/08/03 15:02	2022-08-03	2022-08-03 12:02:00 UTC	St. Petersburg	31	open	false			2022-08-03 15:01:35 UTC	2022-08-04 05:13:05 UTC	research	CC-BY-NC
Natrix natrix	2022-08-03 10:26:55 +0200	47.7538	9.00651	grass snake	https://www.inaturalist.org/observations/129261508	2022-08-03 10:26:55	2022-08-03	2022-08-03 08:26:55 UTC	Berlin	88	open	false	gps	gps	2022-08-03 11:18:40 UTC	2022-09-11 18:31:20 UTC	research
Natrix natrix	2022-08-03 13:32:13 +0300	57.0507	34.9762	grass snake	https://www.inaturalist.org/observations/129258970	2022-08-03 13:32:13+03:00	2022-08-03	2022-08-03 10:32:13 UTC	St. Petersburg	172	open	false			2022-08-03 10:35:49 UTC	2022-08-04 05:13:24 UTC	research	CC-BY-NC
Natrix natrix	2022-08-02 17:46:00 +0200	48.1764	11.6165	grass snake	https://www.inaturalist.org/observations/129256506	2022/08/02 5:46 PM	2022-08-02	2022-08-02 15:46:00 UTC	Berlin	#N/A	open	false			2022-08-03 10:00:59 UTC	2022-08-04 05:13:31 UTC	research	CC-BY-NC
Natrix natrix	2022-08-03 10:48:07 +0200	57.8917	16.1644	grass snake	https://www.inaturalist.org/observations/129253308	Wed Aug 03 2022 10:48:07 GMT +0200 (GMT+2)	2022-08-03	2022-08-03 08:48:07 UTC	Stockholm	95	open	false			2022-08-03 09:13:10 UTC	2022-08-03 11:01:20 UTC	research	CC-BY-NC
Natrix natrix	2014-05-16 12:04:00 +0200	42.2732	19.0648	grass snake	https://www.inaturalist.org/observations/129249785	2014/05/16 12:04	2014-05-16	2014-05-16 10:04:00 UTC	Europe/Podgorica	1124	open	false			2022-08-03 08:12:34 UTC	2022-10-15 20:35:46 UTC	research	CC-BY-NC
Natrix natrix	2022-07-30 18:41:29 +0200	47.8935	11.3613	grass snake	https://www.inaturalist.org/observations/129247406	2022-07-30 18:41:29	2022-07-30	2022-07-30 16:41:29 UTC	Berlin	1609	open	false	gps	gps	2022-08-03 07:26:52 UTC	2022-08-03 07:38:37 UTC	research	CC-BY-NC
Natrix natrix	2020-07-25 22:25:00 +0200	57.1266	12.5655	grass snake	https://www.inaturalist.org/observations/129241594	2020-07-25 22:25:00	2020-07-25	2020-07-25 20:25:00 UTC	Stockholm	1636	open	false	gps	gps	2022-08-03 05:33:07 UTC	2022-08-04 05:13:49 UTC	research	CC-BY-NC
Natrix natrix	2022-07-28 10:22:00 +0300	55.8379	37.2748	grass snake	https://www.inaturalist.org/observations/129227296	2022/07/28 10:22	2022-07-28	2022-07-28 07:22:00 UTC	St. Petersburg	#N/A	open	false			2022-08-03 02:24:50 UTC	2022-08-04 14:55:08 UTC	research	CC-BY-NC
Natrix natrix	2022-07-17 13:45:00 +0200	59.5233	13.9612	grass snake	https://www.inaturalist.org/observations/129194508	2022/07/17 1:45 PM	2022-07-17	2022-07-17 11:45:00 UTC	Stockholm	31	open	false			2022-08-02 21:15:02 UTC	2022-08-03 12:41:49 UTC	research	CC-BY-NC
Natrix natrix	2022-08-02 13:13:08 +0300	60.1686	24.8102	grass snake	https://www.inaturalist.org/observations/129166753	2022-08-02 13:13:08	2022-08-02	2022-08-02 10:13:08 UTC	Helsinki	#N/A	open	false	gps	gps	2022-08-02 17:39:26 UTC	2022-08-03 05:07:34 UTC	research	CC-BY-NC
Natrix natrix	2022-08-02 09:07:18 +0200	49.0519	14.9022	grass snake	https://www.inaturalist.org/observations/129150507	2022-08-02 09:07:18	2022-08-02	2022-08-02 07:07:18 UTC	Prague	4	open	false			2022-08-02 15:43:37 UTC	2022-08-28 20:50:21 UTC	research	CC-BY
Natrix natrix	2022-08-02 16:32:37 +0200	59.3789	18.912	grass snake	https://www.inaturalist.org/observations/129141182	Tue Aug 02 2022 16:32:37 GMT +0200 (GMT+2)	2022-08-02	2022-08-02 14:32:37 UTC	Stockholm	16	open	false			2022-08-02 14:32:44 UTC	2022-08-03 06:38:14 UTC	research	CC-BY-NC
Natrix natrix	2022-08-02 16:12:54 +0200	52.6936	13.3779	grass snake	https://www.inaturalist.org/observations/129140312	2022-08-02 16:12:54+02:00	2022-08-02	2022-08-02 14:12:54 UTC	Berlin	4	open	false			2022-08-02 14:26:21 UTC	2022-08-03 05:07:45 UTC	research	CC-BY-NC
Natrix natrix	2022-08-02 16:00:35 +0200	46.4736	13.7507	grass snake	https://www.inaturalist.org/observations/129137584	2022-08-02 16:00:35+02:00	2022-08-02	2022-08-02 14:00:35 UTC	Ljubljana	3	open	false			2022-08-02 14:01:28 UTC	2022-08-03 15:53:53 UTC	research
Natrix natrix	2022-08-02 15:37:39 +0200	51.4816	11.7718	grass snake	https://www.inaturalist.org/observations/129134914	2022-08-02 15:37:39	2022-08-02	2022-08-02 13:37:39 UTC	Berlin	6	open	false			2022-08-02 13:38:16 UTC	2022-08-02 13:38:16 UTC	casual	CC-BY-NC
Natrix natrix	2017-05-19 14:28:37 +0200	52.3862	14.5797	grass snake	https://www.inaturalist.org/observations/129130790	2017-05-19 14:28:37	2017-05-19	2017-05-19 12:28:37 UTC	Berlin	19	open	true	gps	gps	2022-08-02 13:01:15 UTC	2023-01-15 07:53:29 UTC	research	CC-BY
Natrix natrix	2022-08-02 13:37:00 +0300	55.5793	37.56	grass snake	https://www.inaturalist.org/observations/129120358	2022/08/02 13:37	2022-08-02	2022-08-02 10:37:00 UTC	St. Petersburg	8	open	false			2022-08-02 11:04:45 UTC	2022-08-03 05:08:04 UTC	research	CC-BY-NC
Natrix natrix	2022-07-06 13:49:00 +0300	60.5762	22.2675	grass snake	https://www.inaturalist.org/observations/129119320	2022-07-06 13:49:00+03:00	2022-07-06	2022-07-06 10:49:00 UTC	Helsinki	7	open	false			2022-08-02 10:50:28 UTC	2022-08-02 10:50:28 UTC	casual
Natrix natrix	2022-08-02 10:13:32 +0300	59.981	23.8639	grass snake	https://www.inaturalist.org/observations/129106794	Tue Aug 02 2022 10:13:32 GMT +0300 (GMT+3)	2022-08-02	2022-08-02 07:13:32 UTC	Helsinki	2500	open	false			2022-08-02 07:13:44 UTC	2022-08-03 05:08:11 UTC	research	CC-BY-NC
Natrix natrix	2022-07-19 16:58:02 +0200	50.499	13.3306	grass snake	https://www.inaturalist.org/observations/129105983	2022-07-19 16:58:02	2022-07-19	2022-07-19 14:58:02 UTC	Prague	#N/A	open	false	gps	gps	2022-08-02 07:00:17 UTC	2022-08-03 05:08:35 UTC	research
Natrix natrix	2009-05-02 12:51:00 +0200	49.5502	17.0782	grass snake	https://www.inaturalist.org/observations/129022152	2009/05/02 12:51	2009-05-02	2009-05-02 10:51:00 UTC	Prague	88	open	false			2022-08-01 19:01:49 UTC	2022-08-02 05:13:47 UTC	research
Natrix natrix	2022-07-28 14:25:00 +0200	46.2884	13.6981	grass snake	https://www.inaturalist.org/observations/129008641	2022/07/28 14:25	2022-07-28	2022-07-28 12:25:00 UTC	Ljubljana	72	open	false			2022-08-01 17:36:00 UTC	2022-08-02 05:13:44 UTC	research	CC-BY-NC
Natrix natrix	2022-08-01 08:52:00 +0300	48.5984	44.4823	grass snake	https://www.inaturalist.org/observations/128985654	2022/08/01 08:52	2022-08-01	2022-08-01 05:52:00 UTC	Volgograd	#N/A	open	false			2022-08-01 15:15:02 UTC	2022-10-10 14:11:49 UTC	research	CC0
Natrix natrix	2022-07-08 21:05:00 +0200	56.6752	16.629	grass snake	https://www.inaturalist.org/observations/128982839	2022/07/08 21:05	2022-07-08	2022-07-08 19:05:00 UTC	Stockholm	8	open	false			2022-08-01 14:54:48 UTC	2022-08-02 05:13:40 UTC	research	CC-BY-NC-ND
Natrix natrix	2022-08-01 17:28:02 +0300	59.8828	22.5563	grass snake	https://www.inaturalist.org/observations/128981054	2022-08-01 17:28:02	2022-08-01	2022-08-01 14:28:02 UTC	Helsinki	#N/A	open	true	gps	gps	2022-08-01 14:41:53 UTC	2022-08-02 05:14:01 UTC	research	CC-BY-NC
Natrix natrix	2022-08-01 11:07:06 +0300	55.8188	37.7047	grass snake	https://www.inaturalist.org/observations/128946463	2022-08-01 11:07:06	2022-08-01	2022-08-01 08:07:06 UTC	St. Petersburg	#N/A	open	false	gps	gps	2022-08-01 08:17:18 UTC	2022-08-02 05:14:26 UTC	research	CC-BY-NC
Natrix natrix	2021-03-13 17:15:02 +0100	49.3523	18.0486	grass snake	https://www.inaturalist.org/observations/128875070	2021-03-13 17:15:02	2021-03-13	2021-03-13 16:15:02 UTC	Prague	20	open	false	gps	gps	2022-07-31 21:34:48 UTC	2022-08-01 03:09:44 UTC	research
Natrix natrix	2021-06-09 09:05:00 +0200	48.339	16.0539	grass snake	https://www.inaturalist.org/observations/128871667	2021/06/09 09:05	2021-06-09	2021-06-09 07:05:00 UTC	Vienna	61	open	false			2022-07-31 21:15:42 UTC	2022-08-01 17:35:58 UTC	research	CC-BY-NC
Natrix natrix	2022-07-31 08:07:00 +0300	54.1379	37.5539	grass snake	https://www.inaturalist.org/observations/128867536	2022/07/31 08:07	2022-07-31	2022-07-31 05:07:00 UTC	St. Petersburg	15	open	false			2022-07-31 20:53:56 UTC	2022-08-01 05:01:47 UTC	research	CC-BY-NC
Natrix natrix	2022-07-31 12:49:28 +0300	55.3882	37.1032	grass snake	https://www.inaturalist.org/observations/128861422	2022-07-31 12:49:28+03:00	2022-07-31	2022-07-31 09:49:28 UTC	St. Petersburg	1207	open	false			2022-07-31 20:21:30 UTC	2022-08-01 05:01:51 UTC	research	CC-BY-NC
Natrix natrix	2022-07-21 13:24:00 +0200	45.7739	13.3659	grass snake	https://www.inaturalist.org/observations/128860994	2022/07/21 13:24	2022-07-21	2022-07-21 11:24:00 UTC	Rome	2	open	false			2022-07-31 20:19:17 UTC	2022-09-22 17:45:38 UTC	research
Natrix natrix	2022-07-31 21:03:10 +0300	60.8132	21.3983	grass snake	https://www.inaturalist.org/observations/128837027	Sun Jul 31 2022 21:03:10 GMT +0300 (GMT+3)	2022-07-31	2022-07-31 18:03:10 UTC	Helsinki	48	open	false			2022-07-31 18:03:39 UTC	2022-07-31 21:36:23 UTC	research
Natrix natrix	2022-07-31 13:11:00 +0200	47.5862	16.5498	grass snake	https://www.inaturalist.org/observations/128810684	2022/07/31 13:11	2022-07-31	2022-07-31 11:11:00 UTC	Vienna	2	open	false			2022-07-31 15:41:06 UTC	2022-08-01 05:02:58 UTC	research	CC-BY-NC
Natrix natrix	2022-07-31 17:19:44 +0200	48.5566	16.1209	grass snake	https://www.inaturalist.org/observations/128807479	2022-07-31 17:19:44	2022-07-31	2022-07-31 15:19:44 UTC	Vienna	19	open	false	gps	gps	2022-07-31 15:24:00 UTC	2022-08-01 05:03:04 UTC	research
Natrix natrix	2022-07-30 12:14:00 +0200	48.0702	11.4939	grass snake	https://www.inaturalist.org/observations/128803339	2022/07/30 12:14	2022-07-30	2022-07-30 10:14:00 UTC	Berlin	#N/A	open	false			2022-07-31 15:01:16 UTC	2022-08-01 18:36:04 UTC	research	CC-BY-NC
Natrix natrix	2022-07-29 12:58:54 +0200	49.6812	12.6689	grass snake	https://www.inaturalist.org/observations/128783298	2022-07-29 12:58:54	2022-07-29	2022-07-29 10:58:54 UTC	Prague	#N/A	open	false	gps	gps	2022-07-31 12:38:52 UTC	2022-07-31 15:03:06 UTC	research	CC-BY-NC
Natrix natrix	2022-07-31 14:58:15 +0300	60.5697	24.5723	grass snake	https://www.inaturalist.org/observations/128779115	2022-07-31 14:58:15	2022-07-31	2022-07-31 11:58:15 UTC	Helsinki	8	open	false			2022-07-31 11:58:54 UTC	2022-07-31 13:59:29 UTC	research
Natrix natrix	2022-07-16 13:48:00 +0300	61.6182	21.4203	grass snake	https://www.inaturalist.org/observations/128773246	2022-07-16 13:48:00+03:00	2022-07-16	2022-07-16 10:48:00 UTC	Helsinki	98	open	false			2022-07-31 10:52:09 UTC	2022-07-31 13:01:23 UTC	research
Natrix natrix	2022-07-31 12:48:17 +0200	50.2242	11.9363	grass snake	https://www.inaturalist.org/observations/128772957	Sun Jul 31 2022 12:48:17 GMT +0200 (GMT+2)	2022-07-31	2022-07-31 10:48:17 UTC	Berlin	5	open	false			2022-07-31 10:48:31 UTC	2022-07-31 14:17:23 UTC	research	CC-BY-NC
Natrix natrix	2022-07-31 11:54:48 +0200	55.8158	12.4584	grass snake	https://www.inaturalist.org/observations/128769025	2022-07-31 11:54:48+02:00	2022-07-31	2022-07-31 09:54:48 UTC	Copenhagen	18	open	false			2022-07-31 09:55:21 UTC	2022-07-31 09:58:53 UTC	research	CC-BY-NC
Natrix natrix	2022-07-30 16:49:43 +0200	47.0818	15.3955	grass snake	https://www.inaturalist.org/observations/128768744	2022-07-30 16:49:43+02:00	2022-07-30	2022-07-30 14:49:43 UTC	Vienna	24	open	false			2022-07-31 09:51:40 UTC	2022-07-31 16:21:13 UTC	research	CC-BY-NC
Natrix natrix	2022-07-30 13:48:12 +0200	52.4665	17.0261	grass snake	https://www.inaturalist.org/observations/128765581	2022-07-30 13:48:12	2022-07-30	2022-07-30 11:48:12 UTC	Warsaw	#N/A	open	true	gps	gps	2022-07-31 09:13:42 UTC	2022-07-31 09:36:10 UTC	research	CC-BY-NC
Natrix natrix	2021-08-03 16:23:00 +0200	58.8712	9.60376	grass snake	https://www.inaturalist.org/observations/128678117	2021/08/03 16:23	2021-08-03	2021-08-03 14:23:00 UTC	Europe/Oslo	#N/A	open	false			2022-07-30 20:53:19 UTC	2022-08-01 20:32:56 UTC	research
Natrix natrix	2022-07-22 11:26:00 +0300	42.0695	27.9683	grass snake	https://www.inaturalist.org/observations/128671570	2022/07/22 11:26 AM	2022-07-22	2022-07-22 08:26:00 UTC	Sofia	206	open	false			2022-07-30 20:17:14 UTC	2022-08-07 14:09:15 UTC	research	CC-BY-NC
Natrix natrix	2022-07-22 10:12:00 +0300	42.0674	27.9679	grass snake	https://www.inaturalist.org/observations/128671559	2022/07/22 10:12 AM	2022-07-22	2022-07-22 07:12:00 UTC	Sofia	1953	open	false			2022-07-30 20:17:13 UTC	2022-08-03 13:04:27 UTC	research	CC-BY-NC
Natrix natrix	2022-07-30 12:19:00 +0200	53.3298	16.0979	grass snake	https://www.inaturalist.org/observations/128609600	2022-07-30 12:19:00	2022-07-30	2022-07-30 10:19:00 UTC	Warsaw	265	open	false	gps	gps	2022-07-30 14:32:23 UTC	2022-08-03 18:15:28 UTC	research
Natrix natrix	2022-07-30 14:27:46 +0200	54.4203	10.0696	grass snake	https://www.inaturalist.org/observations/128604583	2022-07-30 14:27:46	2022-07-30	2022-07-30 12:27:46 UTC	Berlin	97	open	false	gps	gps	2022-07-30 13:59:38 UTC	2022-07-30 14:38:14 UTC	research	CC-BY-NC
Natrix natrix	2022-07-30 16:18:29 +0300	60.2796	20.7994	grass snake	https://www.inaturalist.org/observations/128599610	2022-07-30 16:18:29	2022-07-30	2022-07-30 13:18:29 UTC	Europe/Mariehamn	#N/A	open	false	gps	gps	2022-07-30 13:22:34 UTC	2022-07-30 13:28:06 UTC	research
Natrix natrix	2022-07-30 16:15:36 +0300	60.2757	20.7988	grass snake	https://www.inaturalist.org/observations/128598986	2022-07-30 16:15:36	2022-07-30	2022-07-30 13:15:36 UTC	Europe/Mariehamn	#N/A	open	false	gps	gps	2022-07-30 13:17:46 UTC	2022-07-30 13:28:14 UTC	research
Natrix natrix	2022-07-22 00:00:00 +0100	50.6931	14.8552	grass snake	https://www.inaturalist.org/observations/128594720	2022-07-22	2022-07-22		Prague	139	open	false			2022-07-30 12:40:41 UTC	2022-08-17 07:23:03 UTC	research
Natrix natrix	2022-07-29 22:02:22 +0200	42.2822	18.878	grass snake	https://www.inaturalist.org/observations/128501489	2022-07-29 22:02:22	2022-07-29	2022-07-29 20:02:22 UTC	Europe/Podgorica	#N/A	open	false	gps	gps	2022-07-29 20:03:53 UTC	2022-10-15 20:35:46 UTC	research	CC-BY
Natrix natrix	2022-07-22 01:00:09 +0300	40.3066	22.6838	grass snake	https://www.inaturalist.org/observations/128496967	2022-07-22 01:00:09	2022-07-22	2022-07-21 22:00:09 UTC	Athens	#N/A	open	true	gps	gps	2022-07-29 19:34:13 UTC	2022-09-10 05:32:36 UTC	research	CC-BY-NC
Natrix natrix	2022-07-29 14:55:03 +0200	49.0438	17.3065	grass snake	https://www.inaturalist.org/observations/128479737	2022-07-29 14:55:03	2022-07-29	2022-07-29 12:55:03 UTC	Prague	79	open	false	gps	gps	2022-07-29 17:36:50 UTC	2022-07-30 11:24:15 UTC	research	CC-BY-NC
Natrix natrix	2012-09-13 13:49:00 +0300	60.4004	21.0229	grass snake	https://www.inaturalist.org/observations/128449418	2012/09/13 1:49 PM	2012-09-13	2012-09-13 10:49:00 UTC	Europe/Mariehamn	8471	open	false			2022-07-29 14:05:35 UTC	2022-07-29 14:17:30 UTC	research	CC-BY-NC
Natrix natrix	2022-07-29 15:07:55 +0300	60.1253	22.4808	grass snake	https://www.inaturalist.org/observations/128436881	2022-07-29 15:07:55+03:00	2022-07-29	2022-07-29 12:07:55 UTC	Helsinki	9	open	true			2022-07-29 12:09:26 UTC	2022-07-29 12:23:26 UTC	research	CC-BY-NC
Natrix natrix	2022-07-29 14:15:32 +0300	60.2546	20.7365	grass snake	https://www.inaturalist.org/observations/128435603	2022-07-29 14:15:32	2022-07-29	2022-07-29 11:15:32 UTC	Europe/Mariehamn	#N/A	open	false	gps	gps	2022-07-29 11:55:52 UTC	2022-07-29 12:04:00 UTC	research
Natrix natrix	2022-07-29 13:51:36 +0300	60.846	21.1509	grass snake	https://www.inaturalist.org/observations/128434735	2022-07-29 13:51:36	2022-07-29	2022-07-29 10:51:36 UTC	Helsinki	8	open	false	gps	gps	2022-07-29 11:46:13 UTC	2022-07-29 12:03:27 UTC	research
Natrix natrix	2017-07-06 11:20:00 +0300	59.9631	19.9541	grass snake	https://www.inaturalist.org/observations/128428867	2017/07/06 11:20 AM	2017-07-06	2017-07-06 08:20:00 UTC	Europe/Mariehamn	#N/A	open	false			2022-07-29 10:33:04 UTC	2022-07-29 10:50:11 UTC	research	CC-BY-NC
Natrix natrix	2022-07-29 13:10:38 +0300	59.9788	23.8177	grass snake	https://www.inaturalist.org/observations/128427250	Fri Jul 29 2022 13:10:38 GMT +0300 (GMT+3)	2022-07-29	2022-07-29 10:10:38 UTC	Helsinki	23	open	false			2022-07-29 10:10:45 UTC	2022-08-09 10:35:02 UTC	research	CC-BY-NC
Natrix natrix	2022-07-18 00:00:00 +0100	47.7274	8.89565	grass snake	https://www.inaturalist.org/observations/128418329	2022-07-18	2022-07-18		Zurich	52	obscured	true	gps	gps	2022-07-29 07:33:52 UTC	2022-07-29 07:49:03 UTC	research	CC-BY-NC
Natrix natrix	2022-07-28 17:00:49 +0300	54.7315	37.1822	grass snake	https://www.inaturalist.org/observations/128304903	2022-07-28 17:00:49+03:00	2022-07-28	2022-07-28 14:00:49 UTC	St. Petersburg	10	open	false			2022-07-28 15:08:50 UTC	2022-07-29 05:07:43 UTC	research	CC-BY-NC
Natrix natrix	2022-07-23 00:00:00 +0300	55.5799	39.8053	grass snake	https://www.inaturalist.org/observations/128299450	2022/07/23	2022-07-23		St. Petersburg	300	open	false			2022-07-28 14:33:30 UTC	2022-08-15 15:20:32 UTC	research	CC-BY-NC
Natrix natrix	2022-07-23 10:24:00 +0300	55.5683	39.7945	grass snake	https://www.inaturalist.org/observations/128299433	2022/07/23 10:24 AM	2022-07-23	2022-07-23 07:24:00 UTC	St. Petersburg	10	open	false			2022-07-28 14:33:26 UTC	2022-07-28 17:33:41 UTC	research	CC-BY-NC
Natrix natrix	2022-06-26 05:57:00 +0200	47.103	18.0856	grass snake	https://www.inaturalist.org/observations/128297221	2022/06/26 5:57 AM	2022-06-26	2022-06-26 03:57:00 UTC	Budapest	4	open	true			2022-07-28 14:16:33 UTC	2022-08-21 06:27:52 UTC	research
Natrix natrix	2022-07-28 15:27:55 +0200	56.0638	12.2953	grass snake	https://www.inaturalist.org/observations/128291244	2022-07-28 15:27:55	2022-07-28	2022-07-28 13:27:55 UTC	Copenhagen	2000	open	false			2022-07-28 13:29:22 UTC	2022-08-10 06:54:37 UTC	research
Natrix natrix	2022-07-28 16:11:53 +0300	60.2004	20.6681	grass snake	https://www.inaturalist.org/observations/128289568	2022-07-28 16:11:53	2022-07-28	2022-07-28 13:11:53 UTC	Europe/Mariehamn	#N/A	open	false	gps	gps	2022-07-28 13:15:34 UTC	2022-07-31 18:29:08 UTC	needs_id
Natrix natrix	2022-07-26 15:50:00 +0300	50.3409	30.6615	grass snake	https://www.inaturalist.org/observations/128281739	2022/07/26 15:50	2022-07-26	2022-07-26 12:50:00 UTC	Kyiv	488	open	false			2022-07-28 12:12:13 UTC	2022-07-29 05:08:12 UTC	research	CC-BY-NC
Natrix natrix	2022-07-27 13:55:00 +0200	49.3661	20.2169	grass snake	https://www.inaturalist.org/observations/128262180	2022/07/27 13:55	2022-07-27	2022-07-27 11:55:00 UTC	Warsaw	#N/A	open	false			2022-07-28 07:30:31 UTC	2022-07-29 05:08:15 UTC	research
Natrix natrix	2022-07-16 15:49:00 +0300	51.831	38.3976	grass snake	https://www.inaturalist.org/observations/128259143	2022/07/16 15:49	2022-07-16	2022-07-16 12:49:00 UTC	St. Petersburg	81	open	false			2022-07-28 06:34:41 UTC	2022-07-29 05:08:33 UTC	research	CC-BY-NC
Natrix natrix	2022-07-27 15:15:08 +0200	44.7035	20.019	grass snake	https://www.inaturalist.org/observations/128210584	2022-07-27 15:15:08	2022-07-27	2022-07-27 13:15:08 UTC	Belgrade	1541	open	false	gps	gps	2022-07-27 22:05:07 UTC	2022-07-28 05:16:01 UTC	research	CC-BY-NC
Natrix natrix	2022-07-27 16:14:06 +0300	56.3764	43.8649	grass snake	https://www.inaturalist.org/observations/128193132	2022-07-27 16:14:06	2022-07-27	2022-07-27 13:14:06 UTC	St. Petersburg	#N/A	open	false	gps	gps	2022-07-27 19:54:47 UTC	2022-07-28 05:15:55 UTC	research	CC-BY-NC
Natrix natrix	2022-07-26 16:08:24 +0300	45.9903	26.5398	grass snake	https://www.inaturalist.org/observations/128187471	2022-07-26 16:08:24	2022-07-26	2022-07-26 13:08:24 UTC	Bucharest	#N/A	open	false	gps	gps	2022-07-27 19:15:24 UTC	2022-07-28 05:15:32 UTC	research	CC-BY-NC
Natrix natrix	2022-07-27 20:46:47 +0300	56.2068	41.1339	grass snake	https://www.inaturalist.org/observations/128174160	2022-07-27 20:46:47+03:00	2022-07-27	2022-07-27 17:46:47 UTC	St. Petersburg	5	open	false			2022-07-27 17:46:59 UTC	2022-07-28 05:16:29 UTC	research	CC-BY-NC
Natrix natrix	2022-07-27 14:39:00 +0300	57.6393	39.9355	grass snake	https://www.inaturalist.org/observations/128158163	2022/07/27 14:39	2022-07-27	2022-07-27 11:39:00 UTC	St. Petersburg	15	open	false			2022-07-27 16:00:32 UTC	2022-07-28 05:16:34 UTC	research	CC-BY-NC
Natrix natrix	2022-07-27 15:06:46 +0200	59.7502	19.129	grass snake	https://www.inaturalist.org/observations/128137275	2022-07-27 15:06:46	2022-07-27	2022-07-27 13:06:46 UTC	Stockholm	#N/A	open	false	gps	gps	2022-07-27 13:25:48 UTC	2022-07-28 05:16:42 UTC	research	CC-BY-NC
Natrix natrix	2022-07-26 11:20:00 +0300	61.5949	29.9268	grass snake	https://www.inaturalist.org/observations/128134915	2022/07/26 11:20	2022-07-26	2022-07-26 08:20:00 UTC	St. Petersburg	15	open	false			2022-07-27 13:04:24 UTC	2022-07-27 13:34:20 UTC	research	CC-BY-NC
Natrix natrix	2022-07-25 15:59:00 +0300	61.5965	29.9222	grass snake	https://www.inaturalist.org/observations/128134913	2022/07/25 15:59	2022-07-25	2022-07-25 12:59:00 UTC	St. Petersburg	15	open	false			2022-07-27 13:04:23 UTC	2022-07-28 05:17:25 UTC	research	CC-BY-NC
Natrix natrix	2022-07-25 17:43:00 +0200	48.1586	16.9517	grass snake	https://www.inaturalist.org/observations/128134463	2022/07/25 5:43 PM	2022-07-25	2022-07-25 15:43:00 UTC	Vienna	4	open	false			2022-07-27 12:59:17 UTC	2023-01-24 07:13:36 UTC	research
Natrix natrix	2022-07-27 12:44:44 +0200	56.2367	13.3267	grass snake	https://www.inaturalist.org/observations/128122707	2022-07-27 12:44:44	2022-07-27	2022-07-27 10:44:44 UTC	Stockholm	9	open	false			2022-07-27 10:46:23 UTC	2022-12-05 20:33:58 UTC	casual
Natrix natrix	2022-07-26 16:37:00 +0300	50.0381	36.2058	grass snake	https://www.inaturalist.org/observations/128065935	2022/07/26 16:37	2022-07-26	2022-07-26 13:37:00 UTC	Kyiv	4	open	false			2022-07-26 22:57:36 UTC	2022-07-27 05:14:40 UTC	research	CC-BY-NC
Natrix natrix	2022-06-25 12:55:12 +0300	60.1556	24.8541	grass snake	https://www.inaturalist.org/observations/128043457	2022-06-25 12:55:12+03:00	2022-06-25	2022-06-25 09:55:12 UTC	Helsinki	181	open	false			2022-07-26 20:03:14 UTC	2022-07-27 05:14:46 UTC	research	CC-BY-NC
Natrix natrix	2022-07-21 15:29:00 +0300	58.5276	44.8063	grass snake	https://www.inaturalist.org/observations/128041386	2022/07/21 15:29	2022-07-21	2022-07-21 12:29:00 UTC	St. Petersburg	4	open	false			2022-07-26 19:48:24 UTC	2022-07-27 05:14:49 UTC	research	CC-BY-NC
Natrix natrix	2022-07-26 12:19:00 +0300	38.2441	35.2045	grass snake	https://www.inaturalist.org/observations/128037621	2022/07/26 12:19 PM	2022-07-26	2022-07-26 09:19:00 UTC	Istanbul	977	open	false			2022-07-26 19:24:04 UTC	2022-07-31 19:32:01 UTC	research	CC-BY-NC
Natrix natrix	2022-07-26 00:00:00 +0100	55.2371	9.39272	grass snake	https://www.inaturalist.org/observations/128031720	2022/07/26	2022-07-26		Copenhagen	31	open	false			2022-07-26 18:37:55 UTC	2022-07-27 05:14:53 UTC	research	CC-BY-NC
Natrix natrix	2022-07-18 12:19:15 +0200	44.3261	15.4774	grass snake	https://www.inaturalist.org/observations/128017452	2022-07-18 12:19:15+02:00	2022-07-18	2022-07-18 10:19:15 UTC	Zagreb	5	open	false			2022-07-26 17:03:40 UTC	2023-02-11 20:27:54 UTC	research
Natrix natrix	2022-07-26 13:01:13 +0200	50.0127	14.7991	grass snake	https://www.inaturalist.org/observations/128013784	2022-07-26 13:01:13	2022-07-26	2022-07-26 11:01:13 UTC	Prague	310	open	false	gps	gps	2022-07-26 16:37:38 UTC	2022-07-28 07:50:44 UTC	research
Natrix natrix	2022-07-26 18:10:41 +0300	59.9941	22.5091	grass snake	https://www.inaturalist.org/observations/128001336	2022-07-26 18:10:41+03:00	2022-07-26	2022-07-26 15:10:41 UTC	Helsinki	11	open	true			2022-07-26 15:13:28 UTC	2022-07-30 08:57:01 UTC	research	CC-BY-NC
Natrix natrix	2022-07-26 07:36:50 +0200	47.7188	16.4338	grass snake	https://www.inaturalist.org/observations/127984507	2022-07-26 07:36:50	2022-07-26	2022-07-26 05:36:50 UTC	Vienna	34	open	false	gps	gps	2022-07-26 12:45:43 UTC	2022-07-26 12:46:18 UTC	research
Natrix natrix	2022-07-26 13:51:44 +0200	56.7186	11.5319	grass snake	https://www.inaturalist.org/observations/127980012	2022-07-26 13:51:44	2022-07-26	2022-07-26 11:51:44 UTC	Copenhagen	#N/A	open	false	gps	gps	2022-07-26 11:57:39 UTC	2022-07-26 15:20:26 UTC	research
Natrix natrix	2022-07-16 13:59:00 +0300	53.751	34.7273	grass snake	https://www.inaturalist.org/observations/127978040	2022/07/16 13:59	2022-07-16	2022-07-16 10:59:00 UTC	St. Petersburg	4	open	false			2022-07-26 11:34:44 UTC	2022-07-26 11:37:06 UTC	research	CC-BY-NC
Natrix natrix	2022-07-26 12:35:40 +0300	58.0646	38.241	grass snake	https://www.inaturalist.org/observations/127975491	2022-07-26 12:35:40+03:00	2022-07-26	2022-07-26 09:35:40 UTC	St. Petersburg	4	open	false			2022-07-26 11:01:13 UTC	2022-07-27 05:16:17 UTC	research	CC-BY-NC
Natrix natrix	2022-07-26 13:00:39 +0300	55.1422	36.8215	grass snake	https://www.inaturalist.org/observations/127971610	2022-07-26 13:00:39	2022-07-26	2022-07-26 10:00:39 UTC	St. Petersburg	#N/A	open	false	gps	gps	2022-07-26 10:01:14 UTC	2022-07-27 05:16:20 UTC	research	CC-BY-NC
Natrix natrix	2018-05-09 10:18:00 +0200	59.2216	18.0577	grass snake	https://www.inaturalist.org/observations/127969389	2018/05/09 10:18	2018-05-09	2018-05-09 08:18:00 UTC	Stockholm	122	open	false			2022-07-26 09:30:42 UTC	2022-07-27 05:16:23 UTC	research	CC-BY-NC
Natrix natrix	2022-07-26 08:17:59 +0200	46.04	12.4969	grass snake	https://www.inaturalist.org/observations/127962063	2022-07-26 08:17:59+02:00	2022-07-26	2022-07-26 06:17:59 UTC	Rome	4	open	false			2022-07-26 07:19:31 UTC	2022-09-24 15:34:48 UTC	research
Natrix natrix	2022-07-24 15:09:00 +0200	55.7825	12.5633	grass snake	https://www.inaturalist.org/observations/127899346	2022/07/24 3:09 PM	2022-07-24	2022-07-24 13:09:00 UTC	Copenhagen	4	open	false			2022-07-25 20:48:43 UTC	2022-07-26 05:10:30 UTC	research	CC-BY-NC
Natrix natrix	2022-07-22 09:36:24 +0200	51.5039	17.1095	grass snake	https://www.inaturalist.org/observations/127848102	2022-07-22 09:36:24	2022-07-22	2022-07-22 07:36:24 UTC	Warsaw	1354	open	false	gps	gps	2022-07-25 14:57:53 UTC	2022-07-26 05:10:38 UTC	research	CC-BY-NC
Natrix natrix	2022-07-25 17:21:39 +0300	57.9802	33.9021	grass snake	https://www.inaturalist.org/observations/127843390	Mon Jul 25 2022 17:21:39 GMT +0300 (GMT+3)	2022-07-25	2022-07-25 14:21:39 UTC	St. Petersburg	7	open	false			2022-07-25 14:22:35 UTC	2022-12-13 13:31:07 UTC	research	CC-BY-NC
Natrix natrix	2022-07-25 14:39:47 +0200	56.1272	9.97153	grass snake	https://www.inaturalist.org/observations/127842434	2022-07-25 14:39:47+02:00	2022-07-25	2022-07-25 12:39:47 UTC	Copenhagen	2563	open	false			2022-07-25 14:15:06 UTC	2022-07-25 17:02:35 UTC	research
Natrix natrix	2020-08-19 14:44:10 +0200	55.1446	20.8186	grass snake	https://www.inaturalist.org/observations/127833991	2020-08-19 14:44:10+02:00	2020-08-19	2020-08-19 12:44:10 UTC	Kaliningrad	114	open	false			2022-07-25 12:58:06 UTC	2022-07-26 05:10:41 UTC	research	CC-BY-NC
Natrix natrix	2022-07-25 12:54:45 +0300	48.6166	23.6854	grass snake	https://www.inaturalist.org/observations/127818896	2022-07-25 12:54:45	2022-07-25	2022-07-25 09:54:45 UTC	Europe/Uzhgorod	1	open	false			2022-07-25 09:55:35 UTC	2022-07-26 05:10:45 UTC	research	CC-BY-NC
Natrix natrix	2022-07-15 12:21:27 +0200	48.6886	16.9766	grass snake	https://www.inaturalist.org/observations/127818740	2022-07-15 12:21:27+02:00	2022-07-15	2022-07-15 10:21:27 UTC	Prague	13	open	false			2022-07-25 09:52:49 UTC	2022-07-25 11:29:41 UTC	research	CC-BY
Natrix natrix	2022-07-25 09:05:49 +0300	39.5504	20.8431	grass snake	https://www.inaturalist.org/observations/127806165	2022-07-25 09:05:49	2022-07-25	2022-07-25 06:05:49 UTC	Athens	#N/A	open	false	gps	gps	2022-07-25 06:15:38 UTC	2022-09-10 05:32:36 UTC	research	CC-BY-NC
Natrix natrix	2022-06-18 09:27:00 +0200	50.7886	10.7668	grass snake	https://www.inaturalist.org/observations/127805422	2022/06/18 09:27	2022-06-18	2022-06-18 07:27:00 UTC	Berlin	1025	open	false			2022-07-25 06:04:23 UTC	2022-08-04 13:06:34 UTC	research	CC-BY-NC
Natrix natrix	2022-07-23 12:41:00 +0300	56.2833	44.9047	grass snake	https://www.inaturalist.org/observations/127736950	2022/07/23 12:41	2022-07-23	2022-07-23 09:41:00 UTC	St. Petersburg	8	open	false			2022-07-24 20:22:52 UTC	2022-07-25 04:15:27 UTC	research	CC-BY-NC
Natrix natrix	2022-07-24 18:54:15 +0200	51.018	13.821	grass snake	https://www.inaturalist.org/observations/127736793	2022-07-24 18:54:15	2022-07-24	2022-07-24 16:54:15 UTC	Berlin	#N/A	open	false	gps	gps	2022-07-24 20:22:09 UTC	2022-09-25 09:12:26 UTC	research
Natrix natrix	2022-05-27 00:00:00 +0200	60.3871	23.3581	grass snake	https://www.inaturalist.org/observations/127733268	2022-05-27	2022-05-27		Helsinki	23	open	false	gps	gps	2022-07-24 20:00:35 UTC	2022-07-25 05:12:06 UTC	research	CC-BY-NC
Natrix natrix	2022-07-24 13:21:00 +0200	56.4781	9.80865	grass snake	https://www.inaturalist.org/observations/127726448	2022/07/24 13:21	2022-07-24	2022-07-24 11:21:00 UTC	Copenhagen	#N/A	open	false			2022-07-24 19:18:11 UTC	2022-07-30 07:57:55 UTC	research	CC-BY-NC
Natrix natrix	2022-07-24 16:36:51 +0200	52.7072	23.8925	grass snake	https://www.inaturalist.org/observations/127686695	2022-07-24 16:36:51+02:00	2022-07-24	2022-07-24 14:36:51 UTC	Warsaw	132	open	false			2022-07-24 15:25:53 UTC	2022-11-15 13:15:17 UTC	research	CC-BY-NC
Natrix natrix	2022-07-24 15:42:29 +0200	57.1512	13.6656	grass snake	https://www.inaturalist.org/observations/127672217	2022-07-24 15:42:29+02:00	2022-07-24	2022-07-24 13:42:29 UTC	Stockholm	11	open	false			2022-07-24 13:47:53 UTC	2022-07-25 05:12:59 UTC	research	CC-BY-NC
Natrix natrix	2022-07-24 15:28:37 +0300	60.1686	25.4199	grass snake	https://www.inaturalist.org/observations/127663059	2022-07-24 15:28:37+03:00	2022-07-24	2022-07-24 12:28:37 UTC	Helsinki	8	open	false			2022-07-24 12:28:52 UTC	2022-07-25 06:44:15 UTC	research	CC0
Natrix natrix	2022-07-24 13:21:29 +0200	56.4782	9.80842	grass snake	https://www.inaturalist.org/observations/127657114	2022-07-24 13:21:29	2022-07-24	2022-07-24 11:21:29 UTC	Copenhagen	10	open	false			2022-07-24 11:25:18 UTC	2022-07-25 05:13:22 UTC	research	CC-BY-NC
Natrix natrix	2015-09-03 09:53:00 +0200	45.0824	14.5492	grass snake	https://www.inaturalist.org/observations/127649770	2015/09/03 09:53	2015-09-03	2015-09-03 07:53:00 UTC	Zagreb	500	open	false			2022-07-24 09:54:46 UTC	2023-02-11 20:27:55 UTC	research	CC-BY-NC
Natrix natrix	2022-07-24 11:04:01 +0200	47.7069	15.4744	grass snake	https://www.inaturalist.org/observations/127645865	2022-07-24 11:04:01	2022-07-24	2022-07-24 09:04:01 UTC	Vienna	3	open	false			2022-07-24 09:04:49 UTC	2022-07-24 20:53:37 UTC	research	CC-BY-NC
Natrix natrix	2022-07-24 09:00:36 +0200	48.1437	16.6987	grass snake	https://www.inaturalist.org/observations/127636480	2022-07-24 09:00:36	2022-07-24	2022-07-24 07:00:36 UTC	Vienna	22	open	false	gps	gps	2022-07-24 07:01:24 UTC	2022-07-24 07:01:24 UTC	casual	CC-BY-NC
Natrix natrix	2022-07-23 16:45:00 +0300	60.2507	19.5462	grass snake	https://www.inaturalist.org/observations/127581625	2022/07/23 4:45 PM	2022-07-23	2022-07-23 13:45:00 UTC	Europe/Mariehamn	50	open	false			2022-07-23 22:13:21 UTC	2022-07-24 00:47:42 UTC	research
Natrix natrix	2022-07-23 20:51:54 +0300	60.548	25.7932	grass snake	https://www.inaturalist.org/observations/127544977	2022-07-23 20:51:54+03:00	2022-07-23	2022-07-23 17:51:54 UTC	Helsinki	7	open	true			2022-07-23 18:18:05 UTC	2022-07-23 18:27:03 UTC	research	CC-BY-NC
Natrix natrix	2022-05-11 16:40:00 +0200	51.9369	21.0426	grass snake	https://www.inaturalist.org/observations/127529529	2022/05/11 16:40	2022-05-11	2022-05-11 14:40:00 UTC	Warsaw	#N/A	open	false			2022-07-23 16:49:33 UTC	2022-07-23 18:16:17 UTC	research
Natrix natrix	2022-07-23 20:49:00 +0300	55.7739	37.4491	grass snake	https://www.inaturalist.org/observations/127526023	2022/07/23 20:49	2022-07-23	2022-07-23 17:49:00 UTC	St. Petersburg	31	open	false			2022-07-23 16:28:20 UTC	2022-07-27 21:39:46 UTC	research	CC-BY-NC
Natrix natrix	2022-07-05 09:53:00 +0300	51.1921	36.3113	grass snake	https://www.inaturalist.org/observations/127516285	2022/07/05 09:53	2022-07-05	2022-07-05 06:53:00 UTC	St. Petersburg	#N/A	open	false			2022-07-23 15:22:59 UTC	2022-07-23 16:13:23 UTC	research	CC-BY-NC
Natrix natrix	2022-07-16 16:14:00 +0200	47.1924	15.6024	grass snake	https://www.inaturalist.org/observations/127515262	2022-07-16 16:14:00	2022-07-16	2022-07-16 14:14:00 UTC	Vienna	53	open	false	gps	gps	2022-07-23 15:16:22 UTC	2022-07-24 15:33:10 UTC	research
Natrix natrix	2021-02-04 13:47:00 +0200	49.5235	36.5048	grass snake	https://www.inaturalist.org/observations/127513245	2021/02/04 13:47	2021-02-04	2021-02-04 11:47:00 UTC	Kyiv	#N/A	open	false			2022-07-23 15:02:39 UTC	2022-07-23 17:13:05 UTC	research	CC-BY-NC
Natrix natrix	2022-07-23 16:59:41 +0300	60.2506	19.545	grass snake	https://www.inaturalist.org/observations/127509211	2022-07-23 16:59:41	2022-07-23	2022-07-23 13:59:41 UTC	Europe/Mariehamn	4	open	false			2022-07-23 14:35:51 UTC	2022-07-23 20:14:36 UTC	research
Natrix natrix	2022-07-22 17:19:44 +0200	47.4752	10.943	grass snake	https://www.inaturalist.org/observations/127410965	2022-07-22 17:19:44	2022-07-22	2022-07-22 15:19:44 UTC	Berlin	#N/A	open	false	gps	gps	2022-07-22 20:37:17 UTC	2022-07-23 08:06:26 UTC	research	CC-BY-NC
Natrix natrix	2022-07-20 13:38:00 +0200	48.2299	17.2061	grass snake	https://www.inaturalist.org/observations/127406047	2022/07/20 1:38 PM	2022-07-20	2022-07-20 11:38:00 UTC	Bratislava	1190	open	false			2022-07-22 20:00:22 UTC	2022-07-26 05:11:28 UTC	research	CC-BY-NC
Natrix natrix	2022-07-20 10:28:00 +0200	48.1755	16.9802	grass snake	https://www.inaturalist.org/observations/127406045	2022/07/20 10:28 AM	2022-07-20	2022-07-20 08:28:00 UTC	Bratislava	842	open	false			2022-07-22 20:00:22 UTC	2022-07-26 05:11:22 UTC	research	CC-BY-NC
Natrix natrix	2022-07-22 14:03:29 +0200	46.3919	12.0904	grass snake	https://www.inaturalist.org/observations/127367730	2022-07-22 14:03:29	2022-07-22	2022-07-22 12:03:29 UTC	Rome	#N/A	open	false	gps	gps	2022-07-22 15:12:52 UTC	2022-09-26 06:31:35 UTC	research
Natrix natrix	2022-07-22 18:08:55 +0300	61.7887	29.3063	grass snake	https://www.inaturalist.org/observations/127367486	2022-07-22 18:08:55	2022-07-22	2022-07-22 15:08:55 UTC	Helsinki	96	open	false	gps	gps	2022-07-22 15:10:26 UTC	2022-07-22 18:42:01 UTC	research	CC-BY-NC
Natrix natrix	2022-06-08 06:56:07 +0200	43.9514	16.7442	grass snake	https://www.inaturalist.org/observations/127365804	Wed Jun 08 2022 06:56:07 GMT +0200 (GMT+2)	2022-06-08	2022-06-08 04:56:07 UTC	Sarajevo	#N/A	open	false			2022-07-22 14:55:52 UTC	2022-10-15 20:38:03 UTC	research	CC-BY-NC
Natrix natrix	2021-06-03 21:11:15 +0200	50.0209	10.3531	grass snake	https://www.inaturalist.org/observations/127360546	2021-06-03 21:11:15	2021-06-03	2021-06-03 19:11:15 UTC	Berlin	#N/A	open	false	gps	gps	2022-07-22 14:13:33 UTC	2022-07-22 16:51:05 UTC	research	CC-BY-NC
Natrix natrix	2022-07-22 15:45:40 +0200	48.187	16.5804	grass snake	https://www.inaturalist.org/observations/127358062	2022-07-22 15:45:40	2022-07-22	2022-07-22 13:45:40 UTC	Vienna	#N/A	open	false	gps	gps	2022-07-22 13:52:57 UTC	2022-07-26 05:11:39 UTC	research
Natrix natrix	2022-07-22 12:33:58 +0300	48.8053	44.9838	grass snake	https://www.inaturalist.org/observations/127356988	2022-07-22 12:33:58	2022-07-22	2022-07-22 09:33:58 UTC	Volgograd	#N/A	open	false	gps	gps	2022-07-22 13:43:59 UTC	2022-07-26 16:48:42 UTC	research	CC-BY-NC
Natrix natrix	2022-07-22 14:01:00 +0200	50.8169	12.9857	grass snake	https://www.inaturalist.org/observations/127351859	2022/07/22 14:01	2022-07-22	2022-07-22 12:01:00 UTC	Berlin	2	open	false			2022-07-22 12:55:46 UTC	2022-07-22 13:10:08 UTC	research	CC-BY-NC
Natrix natrix	2022-07-22 15:11:36 +0300	60.8456	21.1514	grass snake	https://www.inaturalist.org/observations/127350094	2022-07-22 15:11:36	2022-07-22	2022-07-22 12:11:36 UTC	Helsinki	#N/A	open	false	gps	gps	2022-07-22 12:38:17 UTC	2022-07-29 06:42:01 UTC	research
Natrix natrix	2022-07-22 10:20:40 +0200	48.692	16.8736	grass snake	https://www.inaturalist.org/observations/127346503	2022-07-22 10:20:40+02:00	2022-07-22	2022-07-22 08:20:40 UTC	Vienna	145	open	false			2022-07-22 11:55:29 UTC	2022-07-22 19:56:26 UTC	research	CC-BY-NC
Natrix natrix	2022-07-22 13:03:00 +0300	55.5791	37.555	grass snake	https://www.inaturalist.org/observations/127342722	2022/07/22 13:03	2022-07-22	2022-07-22 10:03:00 UTC	St. Petersburg	4	open	false			2022-07-22 11:03:16 UTC	2022-07-27 16:51:56 UTC	research	CC-BY-NC
Natrix natrix	2022-07-22 11:18:08 +0200	50.869	15.8203	grass snake	https://www.inaturalist.org/observations/127335579	2022-07-22 11:18:08	2022-07-22	2022-07-22 09:18:08 UTC	Warsaw	14	open	false			2022-07-22 09:18:47 UTC	2022-07-22 10:55:15 UTC	research	CC-BY-NC
Natrix natrix	2022-07-22 09:46:23 +0200	50.0214	10.1845	grass snake	https://www.inaturalist.org/observations/127330853	2022-07-22 09:46:23	2022-07-22	2022-07-22 07:46:23 UTC	Berlin	2200	open	false			2022-07-22 08:08:30 UTC	2022-07-22 14:06:50 UTC	casual
Natrix natrix	2013-08-12 11:22:00 +0400	58.5043	37.2802	grass snake	https://www.inaturalist.org/observations/127317834	2013/08/12 11:22	2013-08-12	2013-08-12 07:22:00 UTC	St. Petersburg	15	open	false			2022-07-22 04:17:20 UTC	2022-07-22 05:08:43 UTC	research	CC-BY-NC
Natrix natrix	2022-07-21 17:42:00 +0300	52.1909	27.8892	grass snake	https://www.inaturalist.org/observations/127269843	2022/07/21 17:42	2022-07-21	2022-07-21 14:42:00 UTC	Minsk	15	open	false			2022-07-21 20:08:15 UTC	2022-07-22 06:50:37 UTC	research	CC-BY-NC
Natrix natrix	2022-07-20 20:34:03 +0200	54.0728	11.9493	grass snake	https://www.inaturalist.org/observations/127261896	2022-07-20 19:34:03+01:00	2022-07-20	2022-07-20 18:34:03 UTC	Berlin	42	open	false			2022-07-21 19:04:13 UTC	2022-07-22 05:08:59 UTC	research
Natrix natrix	2022-07-19 15:26:39 +0200	46.3962	14.0878	grass snake	https://www.inaturalist.org/observations/127261244	2022-07-19 15:26:39+02:00	2022-07-19	2022-07-19 13:26:39 UTC	Ljubljana	32	open	false			2022-07-21 18:59:29 UTC	2022-08-17 21:48:59 UTC	research	CC-BY-NC
Natrix natrix	2022-07-21 13:34:00 +0200	50.2701	18.9648	grass snake	https://www.inaturalist.org/observations/127243847	2022/07/21 13:34	2022-07-21	2022-07-21 11:34:00 UTC	Warsaw	24	open	false			2022-07-21 16:46:26 UTC	2022-07-22 05:09:23 UTC	research	CC-BY-NC
Natrix natrix	2022-07-21 15:33:24 +0200	51.5057	11.9716	grass snake	https://www.inaturalist.org/observations/127236689	2022-07-21 15:33:24	2022-07-21	2022-07-21 13:33:24 UTC	Berlin	#N/A	open	false	gps	gps	2022-07-21 15:49:02 UTC	2022-08-02 07:18:08 UTC	research	CC-BY
Natrix natrix	2022-07-21 16:33:48 +0200	54.5213	11.1556	grass snake	https://www.inaturalist.org/observations/127226938	2022-07-21 16:33:48+02:00	2022-07-21	2022-07-21 14:33:48 UTC	Berlin	13	open	false			2022-07-21 14:35:12 UTC	2022-08-05 13:22:56 UTC	research	CC-BY-NC
Natrix natrix		57.1717	33.0253	grass snake	https://www.inaturalist.org/observations/127222112				St. Petersburg	134	open	false	gps	gps	2022-07-21 13:58:09 UTC	2022-08-28 13:49:29 UTC	casual	CC-BY-NC
Natrix natrix	2022-07-21 15:52:52 +0200	55.6986	11.2668	grass snake	https://www.inaturalist.org/observations/127221778	Thu Jul 21 2022 15:52:52 GMT +0200 (GMT+2)	2022-07-21	2022-07-21 13:52:52 UTC	Copenhagen	1940	open	false			2022-07-21 13:54:56 UTC	2022-07-22 05:09:31 UTC	research	CC-BY-NC
Natrix natrix	2022-07-21 14:20:20 +0200	56.2191	10.5846	grass snake	https://www.inaturalist.org/observations/127212716	2022-07-21 14:20:20	2022-07-21	2022-07-21 12:20:20 UTC	Copenhagen	#N/A	open	false	gps	gps	2022-07-21 12:25:19 UTC	2022-07-22 05:09:37 UTC	research	CC-BY-NC
Natrix natrix	2022-07-21 13:27:04 +0200	55.1598	11.791	grass snake	https://www.inaturalist.org/observations/127207871	2022-07-21 13:27:04+02:00	2022-07-21	2022-07-21 11:27:04 UTC	Copenhagen	12	open	false			2022-07-21 11:27:39 UTC	2022-07-22 16:45:19 UTC	research
Natrix natrix	2022-06-25 14:51:00 +0300	52.3322	35.3432	grass snake	https://www.inaturalist.org/observations/127205375	2022/06/25 14:51	2022-06-25	2022-06-25 11:51:00 UTC	St. Petersburg	#N/A	open	false			2022-07-21 10:50:43 UTC	2022-07-21 10:51:14 UTC	research	CC-BY-NC
Natrix natrix	2022-07-19 00:00:00 +0200	59.9358	20.9553	grass snake	https://www.inaturalist.org/observations/127204093	2022/07/19	2022-07-19		Europe/Mariehamn	200	open	false			2022-07-21 10:29:36 UTC	2022-07-21 22:52:34 UTC	research
Natrix natrix	2018-09-10 00:00:00 +0200	39.4518	19.8934	grass snake	https://www.inaturalist.org/observations/127201117	2018-09-10	2018-09-10		Athens	412	open	false	gps	gps	2022-07-21 09:34:53 UTC	2022-11-30 15:08:15 UTC	research	CC-BY-NC
Natrix natrix	2022-07-21 12:30:30 +0300	61.2199	25.7604	grass snake	https://www.inaturalist.org/observations/127200997	2022-07-21 12:30:30	2022-07-21	2022-07-21 09:30:30 UTC	Helsinki	6	open	false			2022-07-21 09:31:41 UTC	2022-07-21 09:39:57 UTC	research
Natrix natrix	2022-07-21 08:24:47 +0300	53.417	26.8195	grass snake	https://www.inaturalist.org/observations/127188896	2022-07-21 08:24:47	2022-07-21	2022-07-21 05:24:47 UTC	Minsk	2	open	false			2022-07-21 05:26:30 UTC	2022-07-21 17:41:28 UTC	research	CC-BY-NC
Natrix natrix	2022-07-20 17:27:00 +0200	46.1748	12.7182	grass snake	https://www.inaturalist.org/observations/127152420	2022-07-20 17:27:00	2022-07-20	2022-07-20 15:27:00 UTC	Rome	1231	open	false	gps	gps	2022-07-20 22:29:08 UTC	2022-09-26 06:37:33 UTC	research	CC-BY-NC
Natrix natrix	2022-06-28 09:30:00 +0300	61.2103	26.0458	grass snake	https://www.inaturalist.org/observations/127142821	2022-06-28 09:30:00	2022-06-28	2022-06-28 06:30:00 UTC	Helsinki	3223	open	false	gps	gps	2022-07-20 20:56:45 UTC	2022-07-21 05:11:24 UTC	research	CC-BY-NC
Natrix natrix	2022-07-20 17:38:34 +0200	48.1756	16.9773	grass snake	https://www.inaturalist.org/observations/127142453	2022-07-20 17:38:34	2022-07-20	2022-07-20 15:38:34 UTC	Bratislava	283	open	false	gps	gps	2022-07-20 20:54:34 UTC	2022-07-21 05:11:28 UTC	research	CC-BY-NC
Natrix natrix	2022-07-20 16:04:37 +0200	55.0636	10.6887	grass snake	https://www.inaturalist.org/observations/127141838	2022-07-20 16:04:37	2022-07-20	2022-07-20 14:04:37 UTC	Copenhagen	#N/A	open	false	gps	gps	2022-07-20 20:49:14 UTC	2022-07-21 23:00:12 UTC	research
Natrix natrix	2022-07-20 00:00:00 +0100	47.8546	13.53	grass snake	https://www.inaturalist.org/observations/127130606	2022-07-20	2022-07-20		Vienna	6	open	false	gps	gps	2022-07-20 19:19:21 UTC	2022-07-24 15:34:22 UTC	research	CC-BY-NC
Natrix natrix	2022-06-27 00:00:00 +0100	49.19	18.0557	grass snake	https://www.inaturalist.org/observations/127123121	2022-06-27	2022-06-27		Prague	26	open	false	gps	gps	2022-07-20 18:16:14 UTC	2022-07-21 05:35:32 UTC	research
Natrix natrix	2022-07-19 17:14:24 +0200	54.0121	13.4772	grass snake	https://www.inaturalist.org/observations/127113790	2022-07-19 17:14:24	2022-07-19	2022-07-19 15:14:24 UTC	Berlin	7397	open	false	gps	gps	2022-07-20 17:04:22 UTC	2022-07-21 05:12:01 UTC	research
Natrix natrix	2022-07-20 10:09:13 +0200	53.8642	8.60413	grass snake	https://www.inaturalist.org/observations/127064010	2022-07-20 10:09:13	2022-07-20	2022-07-20 08:09:13 UTC	Berlin	23	open	false	gps	gps	2022-07-20 08:18:31 UTC	2022-07-21 05:12:07 UTC	research	CC-BY-NC
Natrix natrix	2022-07-20 10:35:06 +0300	60.5073	21.2468	grass snake	https://www.inaturalist.org/observations/127061805	2022-07-20 10:35:06	2022-07-20	2022-07-20 07:35:06 UTC	Helsinki	6	open	false			2022-07-20 07:35:24 UTC	2022-07-20 07:35:24 UTC	casual	CC-BY-NC
Natrix natrix	2022-07-17 11:53:00 +0200	44.9734	14.1092	grass snake	https://www.inaturalist.org/observations/127060921	2022/07/17 11:53 AM	2022-07-17	2022-07-17 09:53:00 UTC	Zagreb	#N/A	open	false			2022-07-20 07:17:30 UTC	2023-02-11 20:28:00 UTC	research	CC-BY-NC
Natrix natrix	2022-07-19 22:53:10 +0300	59.9271	20.928	grass snake	https://www.inaturalist.org/observations/127018365	2022-07-19 22:53:10	2022-07-19	2022-07-19 19:53:10 UTC	Europe/Mariehamn	511	open	false	gps	gps	2022-07-19 22:30:42 UTC	2022-07-20 02:54:40 UTC	research
Natrix natrix	2022-06-14 19:54:00 +0300	51.1644	40.3053	grass snake	https://www.inaturalist.org/observations/127005358	2022/06/14 19:54	2022-06-14	2022-06-14 16:54:00 UTC	St. Petersburg	#N/A	open	false			2022-07-19 20:30:20 UTC	2022-07-20 05:08:42 UTC	research	CC-BY-NC
Natrix natrix	2022-07-19 18:43:00 +0300	54.7564	25.3016	grass snake	https://www.inaturalist.org/observations/126994806	2022/07/19 6:43 PM	2022-07-19	2022-07-19 15:43:00 UTC	Vilnius	61	open	false			2022-07-19 19:07:13 UTC	2022-07-20 05:08:46 UTC	research	CC-BY-NC
Natrix natrix	2022-07-19 16:00:00 +0300	60.1458	21.65	grass snake	https://www.inaturalist.org/observations/126991940	2022-07-19 16:00:00	2022-07-19	2022-07-19 13:00:00 UTC	Helsinki	6330	open	false			2022-07-19 18:46:53 UTC	2022-07-20 11:52:17 UTC	research
Natrix natrix	2022-07-13 14:40:00 +0300	56.0432	37.8544	grass snake	https://www.inaturalist.org/observations/126987383	2022/07/13 14:40	2022-07-13	2022-07-13 11:40:00 UTC	St. Petersburg	15	open	false			2022-07-19 18:13:03 UTC	2022-07-20 05:09:02 UTC	research	CC-BY-NC
Natrix natrix	2022-07-19 19:26:00 +0300	45.3229	37.2814	grass snake	https://www.inaturalist.org/observations/126985709	2022/07/19 19:26	2022-07-19	2022-07-19 16:26:00 UTC	St. Petersburg	#N/A	open	false			2022-07-19 18:00:43 UTC	2022-10-10 14:11:49 UTC	research	CC0
Natrix natrix	2022-07-13 15:05:00 +0200	48.1549	16.2448	grass snake	https://www.inaturalist.org/observations/126980944	2022/07/13 15:05	2022-07-13	2022-07-13 13:05:00 UTC	Vienna	15	open	false			2022-07-19 17:23:52 UTC	2022-07-21 11:33:29 UTC	research	CC0
Natrix natrix	2022-07-19 10:46:00 +0300	45.1937	39.0651	grass snake	https://www.inaturalist.org/observations/126958820	2022/07/19 10:46	2022-07-19	2022-07-19 07:46:00 UTC	St. Petersburg	94	open	false			2022-07-19 14:30:21 UTC	2023-01-10 20:03:47 UTC	research	CC-BY
Natrix natrix	2022-07-19 17:07:32 +0300	60.3051	25.2962	grass snake	https://www.inaturalist.org/observations/126958040	2022-07-19 17:07:32	2022-07-19	2022-07-19 14:07:32 UTC	Helsinki	#N/A	open	false	gps	gps	2022-07-19 14:23:28 UTC	2022-07-20 05:10:14 UTC	research
Natrix natrix	2022-07-19 16:58:25 +0300	60.2125	23.7854	grass snake	https://www.inaturalist.org/observations/126955275	2022-07-19 16:58:25	2022-07-19	2022-07-19 13:58:25 UTC	Helsinki	47	open	false	gps	gps	2022-07-19 14:00:00 UTC	2022-07-20 05:10:18 UTC	research	CC-BY-NC
Natrix natrix	2022-07-19 12:34:50 +0200	54.4972	9.52864	grass snake	https://www.inaturalist.org/observations/126937435	2022-07-19 12:34:50	2022-07-19	2022-07-19 10:34:50 UTC	Berlin	12	open	false			2022-07-19 10:36:01 UTC	2022-07-19 15:44:28 UTC	research
Natrix natrix	2022-07-19 11:57:20 +0200	56.346	10.6601	grass snake	https://www.inaturalist.org/observations/126935029	2022-07-19 11:57:20	2022-07-19	2022-07-19 09:57:20 UTC	Copenhagen	2799	open	false			2022-07-19 09:57:45 UTC	2022-07-19 09:59:20 UTC	casual
Natrix natrix	2022-07-02 16:27:46 +0200	48.2234	11.4784	grass snake	https://www.inaturalist.org/observations/126934540	2022-07-02 16:27:46	2022-07-02	2022-07-02 14:27:46 UTC	Berlin	#N/A	open	false			2022-07-19 09:51:25 UTC	2022-07-21 04:57:17 UTC	research	CC-BY-NC
Natrix natrix	2022-07-18 14:55:33 +0300	48.4089	23.6848	grass snake	https://www.inaturalist.org/observations/126918584	2022-07-18 14:55:33	2022-07-18	2022-07-18 11:55:33 UTC	Europe/Uzhgorod	#N/A	open	false	gps	gps	2022-07-19 05:09:00 UTC	2022-07-19 05:10:06 UTC	research
Natrix natrix	2022-07-16 10:47:00 +0300	50.2171	27.9445	grass snake	https://www.inaturalist.org/observations/126859339	2022/07/16 10:47	2022-07-16	2022-07-16 07:47:00 UTC	Kyiv	15	open	false			2022-07-18 20:04:21 UTC	2022-07-19 05:10:10 UTC	research	CC-BY-NC
Natrix natrix	2012-07-25 16:54:00 +0200	48.786	15.0065	grass snake	https://www.inaturalist.org/observations/126859178	2012/07/25 16:54	2012-07-25	2012-07-25 14:54:00 UTC	Vienna	361	open	false			2022-07-18 20:03:20 UTC	2023-01-04 11:43:50 UTC	research	CC-BY-NC
Natrix natrix	2022-07-18 18:32:23 +0200	50.6291	15.4806	grass snake	https://www.inaturalist.org/observations/126831149	2022-07-18 18:32:23	2022-07-18	2022-07-18 16:32:23 UTC	Prague	7	open	false			2022-07-18 16:34:21 UTC	2022-07-19 05:10:23 UTC	research
Natrix natrix	2022-07-18 14:35:12 +0200	56.478	9.62614	grass snake	https://www.inaturalist.org/observations/126828429	2022-07-18 14:35:12	2022-07-18	2022-07-18 12:35:12 UTC	Copenhagen	#N/A	open	false	gps	gps	2022-07-18 16:12:47 UTC	2022-07-19 05:10:40 UTC	research
Natrix natrix	2022-07-04 12:01:21 +0200	56.0056	12.0714	grass snake	https://www.inaturalist.org/observations/126820363	2022-07-04 12:01:21	2022-07-04	2022-07-04 10:01:21 UTC	Copenhagen	6943	open	false	gps	gps	2022-07-18 15:10:15 UTC	2022-08-15 17:38:00 UTC	research	CC-BY-NC
Natrix natrix	2022-07-18 15:47:00 +0200	48.7601	14.0215	grass snake	https://www.inaturalist.org/observations/126817418	2022-07-18 15:47:00+02:00	2022-07-18	2022-07-18 13:47:00 UTC	Prague	27	open	false			2022-07-18 14:47:51 UTC	2022-07-19 18:42:21 UTC	research	CC-BY-NC
Natrix natrix	2009-05-08 16:21:00 +0200	48.1143	16.065	grass snake	https://www.inaturalist.org/observations/126816221	2009/05/08 16:21	2009-05-08	2009-05-08 14:21:00 UTC	Vienna	329	open	false			2022-07-18 14:39:42 UTC	2022-07-19 05:10:51 UTC	research
Natrix natrix	2022-07-18 16:29:07 +0200	50.1512	13.9559	grass snake	https://www.inaturalist.org/observations/126815658	2022-07-18 16:29:07	2022-07-18	2022-07-18 14:29:07 UTC	Prague	#N/A	open	false	gps	gps	2022-07-18 14:35:31 UTC	2022-07-18 14:36:26 UTC	research	CC-BY-NC
Natrix natrix	2022-07-18 15:53:32 +0200	56.4409	10.1377	grass snake	https://www.inaturalist.org/observations/126813329	2022-07-18 15:53:32	2022-07-18	2022-07-18 13:53:32 UTC	Copenhagen	#N/A	open	false	gps	gps	2022-07-18 14:19:13 UTC	2022-07-18 14:49:29 UTC	research
Natrix natrix	2022-07-17 11:24:52 +0300	57.2961	43.2259	grass snake	https://www.inaturalist.org/observations/126807438	2022-07-17 11:24:52	2022-07-17	2022-07-17 08:24:52 UTC	St. Petersburg	456	open	false	gps	gps	2022-07-18 13:32:10 UTC	2022-08-05 08:59:35 UTC	research	CC-BY-NC
Natrix natrix	2022-07-01 14:37:00 +0300	42.1934	23.9009	grass snake	https://www.inaturalist.org/observations/126799439	2022/07/01 2:37 PM	2022-07-01	2022-07-01 11:37:00 UTC	Sofia	870	open	false			2022-07-18 12:22:04 UTC	2022-07-22 20:50:08 UTC	research	CC-BY-NC
Natrix natrix	2022-07-18 14:20:02 +0200	55.0804	11.7588	grass snake	https://www.inaturalist.org/observations/126799273	2022-07-18 14:20:02+02:00	2022-07-18	2022-07-18 12:20:02 UTC	Copenhagen	6	open	false			2022-07-18 12:20:43 UTC	2022-07-18 12:20:43 UTC	casual
Natrix natrix	2022-07-18 14:43:11 +0300	60.2705	25.1076	grass snake	https://www.inaturalist.org/observations/126795761	2022-07-18 14:43:11+03:00	2022-07-18	2022-07-18 11:43:11 UTC	Helsinki	206	open	false			2022-07-18 11:43:27 UTC	2022-07-18 11:43:27 UTC	casual
Natrix natrix	2022-07-17 16:34:00 +0300	58.075	38.7912	grass snake	https://www.inaturalist.org/observations/126795262	2022/07/17 16:34	2022-07-17	2022-07-17 13:34:00 UTC	St. Petersburg	#N/A	open	false			2022-07-18 11:36:21 UTC	2022-07-18 12:10:48 UTC	research	CC-BY-NC
Natrix natrix	2022-07-18 11:48:39 +0300	60.882	21.3712	grass snake	https://www.inaturalist.org/observations/126785224	2022-07-18 11:48:39	2022-07-18	2022-07-18 08:48:39 UTC	Helsinki	384	open	false	gps	gps	2022-07-18 09:15:30 UTC	2022-08-28 10:14:07 UTC	research	CC-BY-NC
Natrix natrix		48.6231	9.73672	grass snake	https://www.inaturalist.org/observations/126784574				Berlin	49	open	false	gps	gps	2022-07-18 09:05:41 UTC	2022-07-18 09:06:09 UTC	casual
Natrix natrix	2022-07-17 13:16:34 +0200	45.8138	14.5451	grass snake	https://www.inaturalist.org/observations/126780423	2022-07-17 13:16:34+02:00	2022-07-17	2022-07-17 11:16:34 UTC	Ljubljana	4	open	false			2022-07-18 08:04:23 UTC	2022-07-18 20:37:25 UTC	research
Natrix natrix	2022-07-18 09:02:24 +0200	49.84	11.0349	grass snake	https://www.inaturalist.org/observations/126777184	Mon Jul 18 2022 09:02:24 GMT +0200 (GMT+2)	2022-07-18	2022-07-18 07:02:24 UTC	Berlin	29	open	false			2022-07-18 07:02:47 UTC	2022-07-18 07:16:14 UTC	research	CC-BY-NC
Natrix natrix	2022-06-16 17:19:17 +0300	55.6222	38.3656	grass snake	https://www.inaturalist.org/observations/126773987	2022-06-16 17:19:17+03:00	2022-06-16	2022-06-16 14:19:17 UTC	St. Petersburg	8340	open	false			2022-07-18 06:07:14 UTC	2022-07-18 06:11:36 UTC	research
Natrix natrix	2022-07-14 17:38:00 +0300	58.0434	38.3863	grass snake	https://www.inaturalist.org/observations/126772489	2022/07/14 17:38	2022-07-14	2022-07-14 14:38:00 UTC	St. Petersburg	#N/A	open	false			2022-07-18 05:40:01 UTC	2022-07-18 05:59:31 UTC	research	CC-BY-NC
Natrix natrix	2022-07-10 19:00:00 +0200	48.0234	15.8994	grass snake	https://www.inaturalist.org/observations/126754336	2022-07-10 19:00:00	2022-07-10	2022-07-10 17:00:00 UTC	Vienna	40	open	false	gps	gps	2022-07-18 02:26:53 UTC	2022-07-21 21:23:43 UTC	research	CC-BY-NC
Natrix natrix	2009-04-14 13:11:00 +0200	48.2926	15.0618	grass snake	https://www.inaturalist.org/observations/126708665	2009/04/14 13:11	2009-04-14	2009-04-14 11:11:00 UTC	Vienna	31	open	false			2022-07-17 20:47:59 UTC	2022-07-18 05:12:30 UTC	research
Natrix natrix	2007-04-17 15:15:00 +0200	48.1045	16.3532	grass snake	https://www.inaturalist.org/observations/126703089	2007/04/17 15:15	2007-04-17	2007-04-17 13:15:00 UTC	Vienna	97	open	false			2022-07-17 20:13:31 UTC	2023-01-24 07:13:33 UTC	research
Natrix natrix	2022-07-17 21:00:39 +0200	55.854	12.3383	grass snake	https://www.inaturalist.org/observations/126692382	Sun Jul 17 2022 21:00:39 GMT +0200 (GMT+2)	2022-07-17	2022-07-17 19:00:39 UTC	Copenhagen	#N/A	open	false			2022-07-17 19:10:10 UTC	2022-07-18 05:12:55 UTC	research
Natrix natrix	2022-07-17 13:40:16 +0200	49.5758	19.3716	grass snake	https://www.inaturalist.org/observations/126670746	2022-07-17 13:40:16	2022-07-17	2022-07-17 11:40:16 UTC	Warsaw	40	open	false	gps	gps	2022-07-17 17:02:04 UTC	2022-07-18 05:13:01 UTC	research
Natrix natrix	2022-07-17 15:55:00 +0200	47.6606	11.0541	grass snake	https://www.inaturalist.org/observations/126665623	2022/07/17 3:55 PM	2022-07-17	2022-07-17 13:55:00 UTC	Berlin	4	open	false			2022-07-17 16:32:29 UTC	2022-07-18 05:13:03 UTC	research	CC-BY-NC
Natrix natrix	2022-06-15 14:45:12 +0200	49.9808	18.5171	grass snake	https://www.inaturalist.org/observations/126661979	2022-06-15 14:45:12	2022-06-15	2022-06-15 12:45:12 UTC	Warsaw	#N/A	open	false			2022-07-17 16:09:53 UTC	2022-07-31 11:43:32 UTC	research
Natrix natrix	2022-07-17 16:28:43 +0200	54.0983	13.3716	grass snake	https://www.inaturalist.org/observations/126646368	2022-07-17 16:28:43	2022-07-17	2022-07-17 14:28:43 UTC	Berlin	9	open	false	gps	gps	2022-07-17 14:29:54 UTC	2022-11-29 15:56:08 UTC	research	CC-BY-NC
Natrix natrix	2022-07-16 15:14:00 +0300	55.8045	37.4377	grass snake	https://www.inaturalist.org/observations/126643442	2022/07/16 15:14	2022-07-16	2022-07-16 12:14:00 UTC	St. Petersburg	31	open	false			2022-07-17 14:10:26 UTC	2022-07-17 14:30:12 UTC	research	CC-BY-NC
Natrix natrix	2022-07-16 11:31:00 +0200	43.0641	17.7552	grass snake	https://www.inaturalist.org/observations/126638407	2022/07/16 11:31	2022-07-16	2022-07-16 09:31:00 UTC	Sarajevo	4	open	false			2022-07-17 13:34:49 UTC	2022-10-15 20:38:04 UTC	research	CC-BY-NC
Natrix natrix	2022-07-17 14:13:39 +0200	48.4499	8.85446	grass snake	https://www.inaturalist.org/observations/126629050	2022-07-17 14:13:39	2022-07-17	2022-07-17 12:13:39 UTC	Berlin	70	open	false	gps	gps	2022-07-17 12:14:58 UTC	2022-07-17 20:30:32 UTC	research
Natrix natrix	2022-06-24 12:52:00 +0300	54.8168	40.345	grass snake	https://www.inaturalist.org/observations/126624018	2022/06/24 12:52	2022-06-24	2022-06-24 09:52:00 UTC	St. Petersburg	61	open	false			2022-07-17 11:21:51 UTC	2022-07-17 17:21:30 UTC	research	CC-BY-NC
Natrix natrix	2022-04-16 12:41:00 +0200	51.088	9.55511	grass snake	https://www.inaturalist.org/observations/126618907	2022/04/16 12:41 PM	2022-04-16	2022-04-16 10:41:00 UTC	Berlin	212	open	false			2022-07-17 10:25:26 UTC	2022-07-17 10:30:07 UTC	research
Natrix natrix	2022-07-12 11:01:50 +0200	58.6336	16.7994	grass snake	https://www.inaturalist.org/observations/126610326	2022-07-12 11:01:50	2022-07-12	2022-07-12 09:01:50 UTC	Stockholm	#N/A	open	false	gps	gps	2022-07-17 08:38:07 UTC	2022-07-23 05:44:44 UTC	research	CC-BY-NC
Natrix natrix	2022-07-17 10:16:28 +0300	36.7063	29.0525	grass snake	https://www.inaturalist.org/observations/126608824	2022-07-17 10:16:28	2022-07-17	2022-07-17 07:16:28 UTC	Istanbul	1743	open	false	gps	gps	2022-07-17 08:16:53 UTC	2022-07-17 08:16:53 UTC	casual
Natrix natrix	2022-07-16 12:50:00 +0200	52.6377	7.26237	grass snake	https://www.inaturalist.org/observations/126603378	2022/07/16 12:50	2022-07-16	2022-07-16 10:50:00 UTC	Berlin	4	open	true			2022-07-17 06:54:55 UTC	2022-12-20 22:06:11 UTC	research	CC-BY-NC
Natrix natrix	2022-07-06 10:58:00 +0200	48.6787	14.7084	grass snake	https://www.inaturalist.org/observations/126601401	2022/07/06 10:58	2022-07-06	2022-07-06 08:58:00 UTC	Prague	4	open	false			2022-07-17 06:24:55 UTC	2022-07-17 06:52:39 UTC	research	CC-BY-NC-SA
Natrix natrix	2022-06-18 14:51:00 +0300	57.5226	41.1109	grass snake	https://www.inaturalist.org/observations/126475999	2022/06/18 14:51	2022-06-18	2022-06-18 11:51:00 UTC	St. Petersburg	122	open	false			2022-07-16 13:49:42 UTC	2022-07-16 13:53:59 UTC	research	CC-BY-NC
Natrix natrix	2022-03-25 11:08:34 +0100	55.6549	12.5809	grass snake	https://www.inaturalist.org/observations/126469859	2022-03-25 11:08:34	2022-03-25	2022-03-25 10:08:34 UTC	Copenhagen	130	open	false	gps	gps	2022-07-16 12:57:28 UTC	2022-07-16 13:24:26 UTC	research
Natrix natrix	2022-03-25 10:36:57 +0100	55.6541	12.5818	grass snake	https://www.inaturalist.org/observations/126469586	2022-03-25 10:36:57	2022-03-25	2022-03-25 09:36:57 UTC	Copenhagen	349	open	false	gps	gps	2022-07-16 12:54:10 UTC	2022-07-16 12:54:50 UTC	research
Natrix natrix	2022-07-15 16:47:53 +0200	55.0812	15.0534	grass snake	https://www.inaturalist.org/observations/126464753	2022-07-15 16:47:53	2022-07-15	2022-07-15 14:47:53 UTC	Copenhagen	4	open	false			2022-07-16 12:01:41 UTC	2022-07-16 12:56:14 UTC	research	CC-BY-NC
Natrix natrix	2022-07-16 13:54:24 +0200	47.8479	16.5165	grass snake	https://www.inaturalist.org/observations/126464430	2022-07-16 13:54:24	2022-07-16	2022-07-16 11:54:24 UTC	Vienna	#N/A	open	false	gps	gps	2022-07-16 11:58:04 UTC	2022-07-19 07:29:11 UTC	research	CC-BY-NC
Natrix natrix	2022-07-14 15:49:00 +0200	47.8083	15.3626	grass snake	https://www.inaturalist.org/observations/126460295	2022/07/14 15:49	2022-07-14	2022-07-14 13:49:00 UTC	Vienna	#N/A	open	false			2022-07-16 11:06:41 UTC	2022-07-16 19:57:27 UTC	research	CC-BY-NC
Natrix natrix	2022-07-04 12:28:00 +0200	48.6019	16.9237	grass snake	https://www.inaturalist.org/observations/126459371	2022/07/04 12:28	2022-07-04	2022-07-04 10:28:00 UTC	Vienna	31	open	false			2022-07-16 10:54:00 UTC	2022-07-16 10:54:00 UTC	casual	CC-BY-NC
Natrix natrix	2022-07-01 12:28:00 +0200	47.0684	15.8394	grass snake	https://www.inaturalist.org/observations/126459369	2022/07/01 12:28	2022-07-01	2022-07-01 10:28:00 UTC	Vienna	15	open	false			2022-07-16 10:54:00 UTC	2022-07-16 10:54:00 UTC	casual	CC-BY-NC
Natrix natrix	2022-07-10 14:33:00 +0200	48.5036	9.05334	grass snake	https://www.inaturalist.org/observations/126458957	2022/07/10 2:33 PM	2022-07-10	2022-07-10 12:33:00 UTC	Berlin	4	open	true			2022-07-16 10:48:47 UTC	2022-07-22 13:20:56 UTC	research	CC0
Natrix natrix	2022-07-12 16:41:00 +0200	49.9078	9.19646	grass snake	https://www.inaturalist.org/observations/126458839	2022/07/12 16:41	2022-07-12	2022-07-12 14:41:00 UTC	Berlin	#N/A	open	false			2022-07-16 10:46:46 UTC	2022-07-17 13:44:53 UTC	research	CC-BY-NC
Natrix natrix	2022-07-16 12:31:18 +0200	55.8953	13.6723	grass snake	https://www.inaturalist.org/observations/126457652	2022-07-16 12:31:18+02:00	2022-07-16	2022-07-16 10:31:18 UTC	Stockholm	26	open	false			2022-07-16 10:31:44 UTC	2022-07-16 11:10:14 UTC	research	CC-BY-NC
Natrix natrix	2022-07-15 15:18:00 +0200	47.6548	12.3001	grass snake	https://www.inaturalist.org/observations/126389271	2022/07/15 15:18	2022-07-15	2022-07-15 13:18:00 UTC	Vienna	8	open	false			2022-07-15 20:25:05 UTC	2022-07-18 14:43:41 UTC	research	CC-BY-NC
Natrix natrix	2022-07-10 16:20:00 +0300	55.8329	37.6963	grass snake	https://www.inaturalist.org/observations/126388819	2022/07/10 16:20	2022-07-10	2022-07-10 13:20:00 UTC	St. Petersburg	8	open	false			2022-07-15 20:22:01 UTC	2022-07-16 01:57:49 UTC	research	CC-BY-NC
Natrix natrix	2022-07-05 22:26:46 +0200	47.5123	12.9945	grass snake	https://www.inaturalist.org/observations/126380964	2022-07-05 21:26:46+01:00	2022-07-05	2022-07-05 20:26:46 UTC	Berlin	48	open	false			2022-07-15 19:22:09 UTC	2022-07-16 01:58:22 UTC	research
Natrix natrix	2022-07-15 16:57:50 +0200	49.2206	12.4781	grass snake	https://www.inaturalist.org/observations/126348110	2022-07-15 16:57:50	2022-07-15	2022-07-15 14:57:50 UTC	Berlin	1329	open	false	gps	gps	2022-07-15 15:01:49 UTC	2022-07-15 15:10:22 UTC	research	CC-BY-NC
Natrix natrix	2022-07-15 15:40:26 +0300	55.8212	37.7097	grass snake	https://www.inaturalist.org/observations/126333331	2022-07-15 15:40:26+03:00	2022-07-15	2022-07-15 12:40:26 UTC	St. Petersburg	5	open	false			2022-07-15 12:48:01 UTC	2023-01-24 07:13:31 UTC	research	CC-BY-NC
Natrix natrix	2022-07-15 14:38:19 +0200	46.9922	15.5305	grass snake	https://www.inaturalist.org/observations/126332658	2022-07-15 14:38:19	2022-07-15	2022-07-15 12:38:19 UTC	Vienna	135	open	false			2022-07-15 12:39:23 UTC	2022-07-16 19:31:55 UTC	research	CC-BY-NC
Natrix natrix	2022-07-15 09:06:00 +0200	43.2371	17.8327	grass snake	https://www.inaturalist.org/observations/126331541	2022/07/15 09:06	2022-07-15	2022-07-15 07:06:00 UTC	Sarajevo	4	open	false			2022-07-15 12:24:29 UTC	2022-10-15 20:38:08 UTC	research	CC-BY-NC
Natrix natrix	2022-07-15 08:59:00 +0200	43.2372	17.8328	grass snake	https://www.inaturalist.org/observations/126331227	2022/07/15 08:59	2022-07-15	2022-07-15 06:59:00 UTC	Sarajevo	4	open	false			2022-07-15 12:20:49 UTC	2022-10-15 20:38:07 UTC	research	CC-BY-NC
Natrix natrix	2022-07-15 08:58:00 +0200	43.2373	17.8328	grass snake	https://www.inaturalist.org/observations/126330930	2022/07/15 08:58	2022-07-15	2022-07-15 06:58:00 UTC	Sarajevo	4	open	false			2022-07-15 12:16:47 UTC	2022-10-15 20:38:07 UTC	research	CC-BY-NC
Natrix natrix	2022-07-15 11:38:38 +0200	56.2787	15.6309	grass snake	https://www.inaturalist.org/observations/126320388	Fri Jul 15 2022 11:38:38 GMT +0200 (GMT+2)	2022-07-15	2022-07-15 09:38:38 UTC	Stockholm	9	open	false			2022-07-15 09:38:52 UTC	2022-07-23 05:45:14 UTC	research	CC-BY-NC
Natrix natrix	2022-07-15 11:35:35 +0200	59.5739	17.9121	grass snake	https://www.inaturalist.org/observations/126320276	2022-07-15 11:35:35	2022-07-15	2022-07-15 09:35:35 UTC	Stockholm	7	open	false			2022-07-15 09:37:06 UTC	2022-07-15 09:48:58 UTC	casual	CC-BY-NC
Natrix natrix	2017-07-13 14:01:00 +0200	46.6009	14.2641	grass snake	https://www.inaturalist.org/observations/126251700	2017-07-13 14:01:00+02:00	2017-07-13	2017-07-13 12:01:00 UTC	Vienna	22	open	false			2022-07-14 20:20:10 UTC	2022-07-15 05:11:35 UTC	research
Natrix natrix	2022-07-13 09:32:00 +0200	49.3332	16.7343	grass snake	https://www.inaturalist.org/observations/126212171	2022/07/13 09:32	2022-07-13	2022-07-13 07:32:00 UTC	Prague	15	open	false			2022-07-14 15:11:59 UTC	2022-07-15 05:11:44 UTC	research	CC-BY-NC
Natrix natrix	2022-07-14 14:49:43 +0200	56.2068	10.6954	grass snake	https://www.inaturalist.org/observations/126208083	2022-07-14 14:49:43+02:00	2022-07-14	2022-07-14 12:49:43 UTC	Copenhagen	4	open	false			2022-07-14 14:38:52 UTC	2022-07-15 05:11:52 UTC	research
Natrix natrix	2022-04-10 14:00:00 +0300	52.7363	41.553	grass snake	https://www.inaturalist.org/observations/126203971	2022/04/10 14:00	2022-04-10	2022-04-10 11:00:00 UTC	St. Petersburg	474	open	false			2022-07-14 14:03:41 UTC	2022-07-15 05:12:08 UTC	research	CC-BY-NC
Natrix natrix	2021-09-26 00:00:00 +0100	52.4942	21.4117	grass snake	https://www.inaturalist.org/observations/126200267	2021-09-26	2021-09-26		Warsaw	30238	open	false	gps	gps	2022-07-14 13:29:43 UTC	2022-07-16 11:34:46 UTC	research
Natrix natrix	2022-06-16 10:39:00 +0200	45.7956	14.2907	grass snake	https://www.inaturalist.org/observations/126199683	2022/06/16 10:39 AM	2022-06-16	2022-06-16 08:39:00 UTC	Ljubljana	#N/A	open	false			2022-07-14 13:24:48 UTC	2022-07-15 12:44:30 UTC	research	CC-BY-NC
Natrix natrix	2022-07-14 11:36:09 +0200	53.1358	8.71292	grass snake	https://www.inaturalist.org/observations/126183117	2022-07-14 11:36:09+02:00	2022-07-14	2022-07-14 09:36:09 UTC	Berlin	404	open	true			2022-07-14 09:45:08 UTC	2022-09-26 12:00:46 UTC	research
Natrix natrix	2022-07-12 13:24:00 +0200	43.8443	19.2245	grass snake	https://www.inaturalist.org/observations/126109237	2022/07/12 13:24	2022-07-12	2022-07-12 11:24:00 UTC	Sarajevo	4	open	false			2022-07-13 19:54:21 UTC	2022-10-15 20:38:07 UTC	research	CC-BY-NC
Natrix natrix	2022-07-13 17:04:00 +0300	52.4934	42.8036	grass snake	https://www.inaturalist.org/observations/126079072	2022/07/13 17:04	2022-07-13	2022-07-13 14:04:00 UTC	St. Petersburg	5	open	false			2022-07-13 15:59:43 UTC	2022-07-14 05:01:57 UTC	research	CC-BY-NC
Natrix natrix	2022-07-13 15:11:54 +0200	51.8528	21.1965	grass snake	https://www.inaturalist.org/observations/126064065	2022-07-13 15:11:54	2022-07-13	2022-07-13 13:11:54 UTC	Warsaw	239	open	true	gps	gps	2022-07-13 14:03:50 UTC	2022-07-14 05:02:25 UTC	research	CC-BY-NC
Natrix natrix	2022-07-13 16:31:23 +0300	57.6204	39.857	grass snake	https://www.inaturalist.org/observations/126060340	2022-07-13 16:31:23	2022-07-13	2022-07-13 13:31:23 UTC	St. Petersburg	20	open	false	gps	gps	2022-07-13 13:32:22 UTC	2023-01-18 06:04:25 UTC	research	CC-BY-NC
Natrix natrix	2022-07-09 13:43:00 +0200	43.0456	17.7064	grass snake	https://www.inaturalist.org/observations/126059958	2022/07/09 13:43	2022-07-09	2022-07-09 11:43:00 UTC	Sarajevo	18	open	false			2022-07-13 13:28:45 UTC	2022-10-15 20:38:05 UTC	research	CC-BY-NC
Natrix natrix	2022-07-13 13:32:20 +0200	55.8104	12.5157	grass snake	https://www.inaturalist.org/observations/126049592	2022-07-13 13:32:20	2022-07-13	2022-07-13 11:32:20 UTC	Copenhagen	#N/A	open	false	gps	gps	2022-07-13 11:37:24 UTC	2022-07-15 12:32:27 UTC	research	CC-BY-NC
Natrix natrix	2022-07-13 14:28:46 +0300	55.6713	37.395	grass snake	https://www.inaturalist.org/observations/126049019	Wed Jul 13 2022 14:28:46 GMT +0300 (GMT+3)	2022-07-13	2022-07-13 11:28:46 UTC	St. Petersburg	3000	open	false			2022-07-13 11:29:07 UTC	2022-07-16 10:33:04 UTC	research	CC-BY-NC
Natrix natrix	2022-07-12 16:01:31 +0400	42.6432	44.643	grass snake	https://www.inaturalist.org/observations/126043893	2022-07-12 16:01:31+04:00	2022-07-12	2022-07-12 12:01:31 UTC	Tbilisi	10	open	false			2022-07-13 10:15:11 UTC	2022-07-15 00:16:39 UTC	research	CC-BY-NC
Natrix natrix	2022-07-13 11:40:41 +0200	50.7662	12.6228	grass snake	https://www.inaturalist.org/observations/126041915	2022-07-13 11:40:41+02:00	2022-07-13	2022-07-13 09:40:41 UTC	Berlin	4	open	false			2022-07-13 09:45:44 UTC	2022-07-14 05:03:31 UTC	research
Natrix natrix	2022-07-13 11:55:55 +0300	55.6344	37.5008	grass snake	https://www.inaturalist.org/observations/126039793	2022-07-13 11:55:55+03:00	2022-07-13	2022-07-13 08:55:55 UTC	St. Petersburg	14	open	false			2022-07-13 09:13:08 UTC	2022-07-13 13:18:27 UTC	research
Natrix natrix	2021-09-30 18:50:53 +0300	54.1816	25.3778	grass snake	https://www.inaturalist.org/observations/125962503	2021-09-30 18:50:53	2021-09-30	2021-09-30 15:50:53 UTC	Minsk	20	open	false	gps	gps	2022-07-12 18:28:55 UTC	2022-07-12 19:05:15 UTC	research
Natrix natrix	2022-07-12 12:23:00 +0300	59.8811	29.068	grass snake	https://www.inaturalist.org/observations/125961564	Tue Jul 12 2022 12:23:00 GMT+0300 (GMT+3)	2022-07-12	2022-07-12 09:23:00 UTC	St. Petersburg	256	open	false			2022-07-12 18:23:28 UTC	2022-07-16 10:16:14 UTC	research	CC-BY-NC
Natrix natrix	2022-07-11 15:36:39 +0200	50.1007	15.1095	grass snake	https://www.inaturalist.org/observations/125959784	2022-07-11 15:36:39	2022-07-11	2022-07-11 13:36:39 UTC	Prague	#N/A	open	false	gps	gps	2022-07-12 18:09:47 UTC	2022-07-13 05:10:40 UTC	research
Natrix natrix	2022-07-12 14:59:53 +0200	49.0906	18.0214	grass snake	https://www.inaturalist.org/observations/125956296	2022-07-12 14:59:53	2022-07-12	2022-07-12 12:59:53 UTC	Prague	#N/A	open	false	gps	gps	2022-07-12 17:42:54 UTC	2022-07-25 17:27:41 UTC	research
Natrix natrix	2022-07-08 12:09:30 +0200	55.9981	12.3098	grass snake	https://www.inaturalist.org/observations/125945864	2022-07-08 12:09:30+02:00	2022-07-08	2022-07-08 10:09:30 UTC	Copenhagen	8	open	false			2022-07-12 16:26:05 UTC	2022-07-13 05:10:48 UTC	research	CC-BY-NC
Natrix natrix	2022-07-12 00:00:00 +0100	50.0165	14.4888	grass snake	https://www.inaturalist.org/observations/125919285	2022-07-12	2022-07-12		Prague	169	open	false	gps	gps	2022-07-12 13:03:12 UTC	2022-07-13 05:11:11 UTC	research	CC-BY-NC
Natrix natrix	2022-05-21 17:00:00 +0200	44.6723	15.0574	grass snake	https://www.inaturalist.org/observations/125907296	2022/05/21 17:00	2022-05-21	2022-05-21 15:00:00 UTC	Zagreb	1542	open	false			2022-07-12 10:41:05 UTC	2023-02-11 20:32:53 UTC	research	CC0
Natrix natrix	2022-05-09 11:44:00 +0300	51.406	34.8595	grass snake	https://www.inaturalist.org/observations/125901159	2022/05/09 11:44	2022-05-09	2022-05-09 08:44:00 UTC	St. Petersburg	244	open	false			2022-07-12 09:13:19 UTC	2022-07-13 05:11:25 UTC	research	CC-BY-NC
Natrix natrix	2022-06-11 13:59:00 +0200	50.7109	10.931	grass snake	https://www.inaturalist.org/observations/125890167	2022/06/11 13:59	2022-06-11	2022-06-11 11:59:00 UTC	Berlin	962	open	false			2022-07-12 06:09:35 UTC	2022-08-04 13:09:43 UTC	research	CC-BY-NC
Natrix natrix	2022-06-11 12:54:00 +0200	50.7113	10.9303	grass snake	https://www.inaturalist.org/observations/125889921	2022/06/11 12:54	2022-06-11	2022-06-11 10:54:00 UTC	Berlin	962	open	false			2022-07-12 06:04:36 UTC	2022-07-12 19:55:21 UTC	research	CC-BY-NC
Natrix natrix	2022-06-27 17:14:27 +0200	49.1899	18.0556	grass snake	https://www.inaturalist.org/observations/125845534	2022-06-27 17:14:27	2022-06-27	2022-06-27 15:14:27 UTC	Prague	37	open	false	gps	gps	2022-07-11 22:05:49 UTC	2022-07-12 05:08:56 UTC	research
Natrix natrix	2018-09-04 13:12:43 +0300	60.2689	19.6231	grass snake	https://www.inaturalist.org/observations/125783254	2018-09-04 13:12:43	2018-09-04	2018-09-04 10:12:43 UTC	Europe/Mariehamn	3472	open	false	gps	gps	2022-07-11 14:24:47 UTC	2022-07-12 05:09:15 UTC	research	CC-BY
Natrix natrix	2022-07-11 13:15:00 +0300	55.4617	37.5112	grass snake	https://www.inaturalist.org/observations/125779235	2022/07/11 13:15	2022-07-11	2022-07-11 10:15:00 UTC	St. Petersburg	15	open	false			2022-07-11 13:52:18 UTC	2022-07-27 16:52:10 UTC	research	CC-BY-NC
Natrix natrix	2022-07-11 12:45:19 +0200	56.0572	9.2933	grass snake	https://www.inaturalist.org/observations/125770656	2022-07-11 12:45:19	2022-07-11	2022-07-11 10:45:19 UTC	Copenhagen	27	open	false	gps	gps	2022-07-11 12:32:43 UTC	2022-07-15 16:18:10 UTC	research
Natrix natrix	2022-06-01 16:44:43 +0300	50.3755	30.5004	grass snake	https://www.inaturalist.org/observations/125766697	2022-06-01 16:44:43+03:00	2022-06-01	2022-06-01 13:44:43 UTC	Kyiv	383	open	false			2022-07-11 11:45:41 UTC	2022-07-12 05:09:30 UTC	research	CC-BY-NC
Natrix natrix	2022-07-09 13:54:29 +0300	55.1673	22.2134	grass snake	https://www.inaturalist.org/observations/125764675	2022-07-09 13:54:29	2022-07-09	2022-07-09 10:54:29 UTC	Vilnius	#N/A	open	false	gps	gps	2022-07-11 11:21:43 UTC	2022-07-12 05:09:43 UTC	research	CC-BY-NC
Natrix natrix	2022-07-11 13:01:30 +0200	50.602	11.5851	grass snake	https://www.inaturalist.org/observations/125764513	2022-07-11 13:01:30+02:00	2022-07-11	2022-07-11 11:01:30 UTC	Berlin	8	open	false			2022-07-11 11:19:30 UTC	2022-07-12 05:09:46 UTC	research
Natrix natrix	2022-05-08 12:15:00 +0300	54.7094	40.8493	grass snake	https://www.inaturalist.org/observations/125763941	2022/05/08 12:15 MSK	2022-05-08	2022-05-08 09:15:00 UTC	St. Petersburg	10	open	false			2022-07-11 11:11:43 UTC	2022-07-12 05:10:11 UTC	research	CC-BY-NC
Natrix natrix	2022-07-11 11:41:06 +0200	61.4601	17.1267	grass snake	https://www.inaturalist.org/observations/125757751	2022-07-11 11:41:06+02:00	2022-07-11	2022-07-11 09:41:06 UTC	Stockholm	4	open	false			2022-07-11 09:42:12 UTC	2022-07-12 07:05:42 UTC	research	CC-BY-NC
Natrix natrix	2022-07-11 11:39:05 +0200	61.4602	17.1263	grass snake	https://www.inaturalist.org/observations/125757657	2022-07-11 11:39:05+02:00	2022-07-11	2022-07-11 09:39:05 UTC	Stockholm	4	open	false			2022-07-11 09:40:22 UTC	2022-07-12 05:10:16 UTC	research	CC-BY-NC
Natrix natrix	2022-07-11 11:54:33 +0300	51.6263	39.4129	grass snake	https://www.inaturalist.org/observations/125755012	2022-07-11 11:54:33	2022-07-11	2022-07-11 08:54:33 UTC	St. Petersburg	5144	open	false	gps	gps	2022-07-11 08:59:46 UTC	2022-07-11 09:44:52 UTC	research	CC-BY-NC
Natrix natrix	2022-07-09 00:00:00 +0100	52.945	8.83416	grass snake	https://www.inaturalist.org/observations/125700747	2022-07-09	2022-07-09		Berlin	1593550	open	false	gps	gps	2022-07-10 23:23:52 UTC	2022-07-15 16:26:20 UTC	research	CC-BY-NC
Natrix natrix	2022-07-10 12:43:00 +0300	55.0725	36.5803	grass snake	https://www.inaturalist.org/observations/125673898	2022/07/10 12:43	2022-07-10	2022-07-10 09:43:00 UTC	St. Petersburg	#N/A	open	false			2022-07-10 20:34:17 UTC	2022-07-11 05:03:05 UTC	research	CC-BY-NC
Natrix natrix	2022-04-28 17:50:48 +0200	51.1369	9.51518	grass snake	https://www.inaturalist.org/observations/125669967	2022-04-28 17:50:48+02:00	2022-04-28	2022-04-28 15:50:48 UTC	Berlin	#N/A	open	true			2022-07-10 20:12:00 UTC	2022-07-13 12:40:40 UTC	research	CC-BY-NC
Natrix natrix	2022-07-10 11:25:23 +0200	52.4848	11.0546	grass snake	https://www.inaturalist.org/observations/125667035	2022-07-10 11:25:23	2022-07-10	2022-07-10 09:25:23 UTC	Berlin	403	open	false	gps	gps	2022-07-10 19:55:21 UTC	2022-07-11 05:03:24 UTC	research	CC-BY-NC
Natrix natrix	2022-07-10 13:28:12 +0200	47.8934	12.8608	grass snake	https://www.inaturalist.org/observations/125657110	2022-07-10 13:28:12	2022-07-10	2022-07-10 11:28:12 UTC	Berlin	1454	open	false	gps	gps	2022-07-10 18:58:55 UTC	2022-07-11 05:03:36 UTC	research
Natrix natrix	2022-06-11 16:22:00 +0300	55.909	21.0622	grass snake	https://www.inaturalist.org/observations/125617918	2022/06/11 4:22 PM	2022-06-11	2022-06-11 13:22:00 UTC	Vilnius	100	open	false			2022-07-10 15:03:37 UTC	2023-02-18 18:13:26 UTC	research
Natrix natrix	2022-07-10 16:38:41 +0200	59.4661	18.7532	grass snake	https://www.inaturalist.org/observations/125614130	2022-07-10 16:38:41+02:00	2022-07-10	2022-07-10 14:38:41 UTC	Stockholm	3	open	false			2022-07-10 14:38:55 UTC	2022-07-12 07:29:55 UTC	research	CC-BY-NC
Natrix natrix	2022-07-10 12:40:22 +0200	44.9051	20.262	grass snake	https://www.inaturalist.org/observations/125587153	2022-07-10 12:40:22	2022-07-10	2022-07-10 10:40:22 UTC	Belgrade	183	open	false	gps	gps	2022-07-10 10:53:56 UTC	2022-07-10 13:58:16 UTC	research	CC-BY-NC
Natrix natrix	2022-07-10 10:59:41 +0300	42.6679	23.3075	grass snake	https://www.inaturalist.org/observations/125583634	2022-07-10 10:59:41	2022-07-10	2022-07-10 07:59:41 UTC	Sofia	79	open	false	gps	gps	2022-07-10 10:12:35 UTC	2022-07-11 05:04:02 UTC	research	CC-BY-NC
Natrix natrix	2022-07-08 16:36:00 +0300	54.0991	42.0901	grass snake	https://www.inaturalist.org/observations/125500733	2022/07/08 16:36	2022-07-08	2022-07-08 13:36:00 UTC	St. Petersburg	4	open	false			2022-07-09 20:00:32 UTC	2022-07-11 05:04:37 UTC	research	CC-BY-NC
Natrix natrix	2022-07-09 08:20:00 +0300	59.842	23.2578	grass snake	https://www.inaturalist.org/observations/125479441	2022/07/09 8:20 AM	2022-07-09	2022-07-09 05:20:00 UTC	Helsinki	50	open	false			2022-07-09 17:44:15 UTC	2022-07-11 12:08:54 UTC	research	CC-BY-NC
Natrix natrix	2022-07-09 15:52:00 +0200	46.7278	15.6206	grass snake	https://www.inaturalist.org/observations/125471448	2022/07/09 15:52	2022-07-09	2022-07-09 13:52:00 UTC	Vienna	#N/A	open	false			2022-07-09 16:52:24 UTC	2022-07-09 17:50:45 UTC	research	CC-BY-NC
Natrix natrix	2022-07-09 16:16:52 +0200	53.2771	9.97049	grass snake	https://www.inaturalist.org/observations/125447437	2022-07-09 16:16:52+02:00	2022-07-09	2022-07-09 14:16:52 UTC	Berlin	1628	open	false			2022-07-09 14:16:55 UTC	2022-07-11 16:08:29 UTC	research	CC0
Natrix natrix	2022-07-09 11:45:22 +0300	55.3352	26.1457	grass snake	https://www.inaturalist.org/observations/125438721	2022-07-09 11:45:22+03:00	2022-07-09	2022-07-09 08:45:22 UTC	Vilnius	8	open	false			2022-07-09 13:06:28 UTC	2022-07-14 05:04:08 UTC	research
Natrix natrix	2022-05-08 10:40:00 +0300	54.7086	40.8483	grass snake	https://www.inaturalist.org/observations/125433422	2022/05/08 10:40 MSK	2022-05-08	2022-05-08 07:40:00 UTC	St. Petersburg	100	open	false			2022-07-09 12:18:55 UTC	2022-07-09 12:29:41 UTC	research	CC-BY-NC
Natrix natrix	2022-05-08 09:13:00 +0300	54.7034	40.8631	grass snake	https://www.inaturalist.org/observations/125433410	2022/05/08 09:13 MSK	2022-05-08	2022-05-08 06:13:00 UTC	St. Petersburg	50	open	false			2022-07-09 12:18:52 UTC	2022-07-09 12:28:24 UTC	research	CC-BY-NC
Natrix natrix	2022-06-24 19:30:00 +0200	59.7219	15.4443	grass snake	https://www.inaturalist.org/observations/125432860	2022/06/24 7:30 PM	2022-06-24	2022-06-24 17:30:00 UTC	Stockholm	13	open	false			2022-07-09 12:14:03 UTC	2022-09-05 17:34:04 UTC	research	CC-BY-NC
Natrix natrix	2022-05-08 07:22:00 +0300	54.714	40.854	grass snake	https://www.inaturalist.org/observations/125422089	2022/05/08 07:22 MSK	2022-05-08	2022-05-08 04:22:00 UTC	St. Petersburg	300	open	false			2022-07-09 10:06:49 UTC	2022-07-09 10:33:26 UTC	research	CC-BY-NC
Natrix natrix	2018-07-23 14:12:00 +0200	57.8887	11.5723	grass snake	https://www.inaturalist.org/observations/125414724	2018/07/23 14:12	2018-07-23	2018-07-23 12:12:00 UTC	Stockholm	544	open	false			2022-07-09 08:12:13 UTC	2022-07-09 08:20:00 UTC	research
Natrix natrix	2022-07-09 10:28:52 +0300	54.1618	30.3289	grass snake	https://www.inaturalist.org/observations/125412640	2022-07-09 10:28:52+03:00	2022-07-09	2022-07-09 07:28:52 UTC	Minsk	6	open	false			2022-07-09 07:35:55 UTC	2022-10-10 17:05:02 UTC	research
Natrix natrix	2022-07-09 08:28:42 +0200	48.0662	11.2717	grass snake	https://www.inaturalist.org/observations/125408924	2022-07-09 08:28:42	2022-07-09	2022-07-09 06:28:42 UTC	Berlin	5	open	false			2022-07-09 06:30:45 UTC	2022-07-30 23:48:52 UTC	research	CC-BY-NC
Natrix natrix	2022-06-21 15:25:41 +0200	50.9655	14.0815	grass snake	https://www.inaturalist.org/observations/125401242	2022-06-21 15:25:41	2022-06-21	2022-06-21 13:25:41 UTC	Berlin	162	open	false	gps	gps	2022-07-09 04:22:43 UTC	2022-07-09 04:28:01 UTC	research
Natrix natrix	2022-07-07 13:37:00 +0300	55.5642	37.7315	grass snake	https://www.inaturalist.org/observations/125362573	2022/07/07 13:37	2022-07-07	2022-07-07 10:37:00 UTC	St. Petersburg	1	open	false			2022-07-08 21:36:16 UTC	2022-07-27 16:52:12 UTC	research	CC-BY
Natrix natrix	2022-07-08 15:39:35 +0200	50.3073	15.0144	grass snake	https://www.inaturalist.org/observations/125361303	2022-07-08 15:39:35+02:00	2022-07-08	2022-07-08 13:39:35 UTC	Prague	4	open	false			2022-07-08 21:25:13 UTC	2022-07-09 07:38:21 UTC	research	CC-BY-NC
Natrix natrix	2022-07-08 13:31:38 +0200	55.9573	11.5859	grass snake	https://www.inaturalist.org/observations/125350846	2022-07-08 13:31:38+02:00	2022-07-08	2022-07-08 11:31:38 UTC	Copenhagen	8	open	false			2022-07-08 20:08:33 UTC	2022-07-08 21:16:25 UTC	research
Natrix natrix	2022-07-08 17:10:49 +0200	48.3519	16.2491	grass snake	https://www.inaturalist.org/observations/125339043	2022-07-08 17:10:49+02:00	2022-07-08	2022-07-08 15:10:49 UTC	Vienna	55	open	false			2022-07-08 18:32:50 UTC	2022-07-21 19:16:04 UTC	research	CC-BY-NC
Natrix natrix	2022-07-08 20:07:11 +0300	60.2428	25.9514	grass snake	https://www.inaturalist.org/observations/125329753	2022-07-08 20:07:11	2022-07-08	2022-07-08 17:07:11 UTC	Helsinki	#N/A	open	false	gps	gps	2022-07-08 17:28:42 UTC	2022-07-08 18:00:36 UTC	research	CC-BY-NC
Natrix natrix	2022-07-08 15:15:47 +0200	55.0981	10.0966	grass snake	https://www.inaturalist.org/observations/125315711	2022-07-08 15:15:47+02:00	2022-07-08	2022-07-08 13:15:47 UTC	Copenhagen	8	open	false			2022-07-08 15:50:10 UTC	2022-10-15 20:05:59 UTC	research	CC-BY-NC
Natrix natrix	2022-07-08 17:40:56 +0200	55.1345	8.49219	grass snake	https://www.inaturalist.org/observations/125314560	2022-07-08 17:40:56+02:00	2022-07-08	2022-07-08 15:40:56 UTC	Copenhagen	35	open	false			2022-07-08 15:42:02 UTC	2022-07-08 16:13:59 UTC	research
Natrix natrix	2022-06-24 11:20:02 +0300	60.1514	24.9477	grass snake	https://www.inaturalist.org/observations/125311885	2022-06-24 11:20:02	2022-06-24	2022-06-24 08:20:02 UTC	Helsinki	253	open	false	gps	gps	2022-07-08 15:22:41 UTC	2022-07-08 15:32:20 UTC	research	CC-BY-NC
Natrix natrix	2022-07-08 16:37:53 +0300	61.566	29.2043	grass snake	https://www.inaturalist.org/observations/125300728	2022-07-08 16:37:53	2022-07-08	2022-07-08 13:37:53 UTC	Helsinki	24	open	true	gps	gps	2022-07-08 13:47:42 UTC	2022-07-08 14:01:10 UTC	research	CC-BY-NC
Natrix natrix	2019-08-13 15:53:00 +0300	55.8305	37.7071	grass snake	https://www.inaturalist.org/observations/125281927	2019/08/13 15:53	2019-08-13	2019-08-13 12:53:00 UTC	St. Petersburg	68	open	false			2022-07-08 09:59:25 UTC	2022-10-14 20:18:24 UTC	research	CC-BY-NC
Natrix natrix	2022-05-21 12:27:18 +0200	48.2361	10.1544	grass snake	https://www.inaturalist.org/observations/125240101	2022-05-21 12:27:18	2022-05-21	2022-05-21 10:27:18 UTC	Berlin	158	open	false	gps	gps	2022-07-08 00:19:28 UTC	2022-07-08 11:23:21 UTC	research	CC-BY-NC
Natrix natrix	2020-09-14 16:40:00 +0300	51.0263	24.3091	grass snake	https://www.inaturalist.org/observations/125223487	2020/09/14 16:40	2020-09-14	2020-09-14 13:40:00 UTC	Kyiv	#N/A	open	false			2022-07-07 21:46:12 UTC	2022-07-08 05:13:23 UTC	research	CC-BY-NC
Natrix natrix	2021-08-15 12:47:00 +0300	55.8267	37.7949	grass snake	https://www.inaturalist.org/observations/125212484	2021-08-15 12:47:00	2021-08-15	2021-08-15 09:47:00 UTC	St. Petersburg	308	open	false			2022-07-07 20:15:15 UTC	2022-07-08 05:13:29 UTC	research	CC-BY-NC
Natrix natrix	2022-07-05 09:56:00 +0300	51.1919	36.3113	grass snake	https://www.inaturalist.org/observations/125179662	2022/07/05 09:56	2022-07-05	2022-07-05 06:56:00 UTC	St. Petersburg	8	open	false			2022-07-07 16:00:39 UTC	2022-07-08 05:13:32 UTC	research	CC-BY-NC
Natrix natrix	2013-05-22 17:39:00 +0300	58.485	22.6136	grass snake	https://www.inaturalist.org/observations/125167339	2013/05/22 17:39	2013-05-22	2013-05-22 14:39:00 UTC	Tallinn	44993	open	false			2022-07-07 14:25:04 UTC	2022-07-08 05:14:04 UTC	research	CC-BY-NC
Natrix natrix	2022-07-07 13:33:41 +0200	55.1012	10.5566	grass snake	https://www.inaturalist.org/observations/125149395	2022-07-07 13:33:41+02:00	2022-07-07	2022-07-07 11:33:41 UTC	Copenhagen	9	open	false			2022-07-07 11:33:55 UTC	2022-07-07 11:33:55 UTC	casual	CC-BY-NC
Natrix natrix	2022-07-05 21:10:50 +0200	55.0543	22.3697	grass snake	https://www.inaturalist.org/observations/125127951	2022-07-05 21:10:50+02:00	2022-07-05	2022-07-05 19:10:50 UTC	Kaliningrad	4	open	false			2022-07-07 05:20:46 UTC	2022-07-07 05:23:18 UTC	research
Natrix natrix	2022-07-05 18:18:00 +0300	54.1013	42.0926	grass snake	https://www.inaturalist.org/observations/125077970	2022/07/05 18:18	2022-07-05	2022-07-05 15:18:00 UTC	St. Petersburg	4	open	false			2022-07-06 20:49:05 UTC	2022-07-07 05:23:21 UTC	research	CC-BY-NC
Natrix natrix	2022-07-03 14:12:00 +0200	52.5021	9.59646	grass snake	https://www.inaturalist.org/observations/125043221	2022/07/03 14:12	2022-07-03	2022-07-03 12:12:00 UTC	Berlin	122	open	false			2022-07-06 16:33:29 UTC	2022-07-07 20:30:49 UTC	research	CC-BY-NC
Natrix natrix	2022-07-06 15:55:41 +0200	46.8797	19.7106	grass snake	https://www.inaturalist.org/observations/125040193	2022-07-06 15:55:41+02:00	2022-07-06	2022-07-06 13:55:41 UTC	Budapest	15	open	false			2022-07-06 16:11:14 UTC	2022-07-07 05:24:08 UTC	research	CC-BY-NC
Natrix natrix	2022-07-06 17:42:55 +0300	57.201	37.691	grass snake	https://www.inaturalist.org/observations/125035113	2022-07-06 17:42:55+03:00	2022-07-06	2022-07-06 14:42:55 UTC	St. Petersburg	13	open	false			2022-07-06 15:35:18 UTC	2022-09-29 20:38:06 UTC	research	CC-BY-NC
Natrix natrix	2022-07-06 10:21:49 +0300	53.2137	34.6613	grass snake	https://www.inaturalist.org/observations/125004899	2022-07-06 10:21:49	2022-07-06	2022-07-06 07:21:49 UTC	St. Petersburg	#N/A	open	false	gps	gps	2022-07-06 11:07:53 UTC	2022-07-07 05:24:18 UTC	research	CC-BY-NC
Natrix natrix	2022-07-05 10:33:00 +0300	54.1449	37.5401	grass snake	https://www.inaturalist.org/observations/125004344	2022/07/05 10:33	2022-07-05	2022-07-05 07:33:00 UTC	St. Petersburg	#N/A	open	false			2022-07-06 11:00:16 UTC	2022-07-06 11:02:30 UTC	research	CC-BY
Natrix natrix	2022-07-06 10:37:38 +0300	55.0365	37.4642	grass snake	https://www.inaturalist.org/observations/124997474	2022-07-06 10:37:38	2022-07-06	2022-07-06 07:37:38 UTC	St. Petersburg	#N/A	open	false	gps	gps	2022-07-06 09:31:38 UTC	2023-02-02 12:32:29 UTC	research	CC-BY-NC
Natrix natrix	2022-07-04 11:24:00 +0200	46.751	16.0477	grass snake	https://www.inaturalist.org/observations/124996746	2022/07/04 11:24	2022-07-04	2022-07-04 09:24:00 UTC	Ljubljana	1045	open	false			2022-07-06 09:21:57 UTC	2022-07-15 14:16:34 UTC	research	CC-BY-NC
Natrix natrix	2022-07-06 10:25:18 +0300	61.2445	26.0614	grass snake	https://www.inaturalist.org/observations/124990343	2022-07-06 10:25:18	2022-07-06	2022-07-06 07:25:18 UTC	Helsinki	#N/A	open	false	gps	gps	2022-07-06 07:26:10 UTC	2022-07-06 08:01:48 UTC	research
Natrix natrix	2022-06-24 14:26:15 +0200	48.4442	11.709	grass snake	https://www.inaturalist.org/observations/124946675	2022-06-24 14:26:15+02:00	2022-06-24	2022-06-24 12:26:15 UTC	Berlin	26	open	false			2022-07-05 22:25:43 UTC	2022-07-06 06:26:46 UTC	research
Natrix natrix	2022-07-04 18:23:01 +0300	49.7981	34.6127	grass snake	https://www.inaturalist.org/observations/124940403	2022-07-04 18:23:01	2022-07-04	2022-07-04 15:23:01 UTC	Kyiv	49	open	false	gps	gps	2022-07-05 21:27:32 UTC	2022-07-06 06:26:50 UTC	research
Natrix natrix	2022-07-05 17:44:42 +0300	60.2907	24.5665	grass snake	https://www.inaturalist.org/observations/124892594	2022-07-05 17:44:42	2022-07-05	2022-07-05 14:44:42 UTC	Helsinki	#N/A	open	false	gps	gps	2022-07-05 15:31:50 UTC	2022-07-06 06:26:57 UTC	research	CC-BY-NC-SA
Natrix natrix	2022-04-29 18:44:00 +0200	57.6049	12.7979	grass snake	https://www.inaturalist.org/observations/124879677	2022-04-29 18:44:00	2022-04-29	2022-04-29 16:44:00 UTC	Stockholm	118	open	false	gps	gps	2022-07-05 13:44:43 UTC	2023-02-13 11:26:20 UTC	research
Natrix natrix	2022-07-05 12:48:00 +0300	55.8831	37.4597	grass snake	https://www.inaturalist.org/observations/124873809	2022/07/05 12:48	2022-07-05	2022-07-05 09:48:00 UTC	St. Petersburg	2	open	false			2022-07-05 12:47:53 UTC	2022-07-05 15:50:24 UTC	research	CC-BY-NC
Natrix natrix	2022-07-05 12:42:41 +0200	56.0151	9.69491	grass snake	https://www.inaturalist.org/observations/124866848	2022-07-05 12:42:41+02:00	2022-07-05	2022-07-05 10:42:41 UTC	Copenhagen	4	open	false			2022-07-05 11:22:52 UTC	2022-07-06 06:29:26 UTC	research	CC-BY-NC
Natrix natrix	2022-07-05 10:46:41 +0300	55.902	21.0566	grass snake	https://www.inaturalist.org/observations/124865854	2022-07-05 10:46:41	2022-07-05	2022-07-05 07:46:41 UTC	Vilnius	#N/A	open	false	gps	gps	2022-07-05 11:06:50 UTC	2022-07-06 06:29:31 UTC	research
Natrix natrix	2022-07-05 09:14:57 +0200	51.0841	17.2382	grass snake	https://www.inaturalist.org/observations/124852023	2022-07-05 09:14:57	2022-07-05	2022-07-05 07:14:57 UTC	Warsaw	1784	open	false	gps	gps	2022-07-05 07:17:32 UTC	2022-08-09 20:57:21 UTC	research
Natrix natrix	2022-06-24 12:41:02 +0200	48.4424	11.7087	grass snake	https://www.inaturalist.org/observations/124846949	2022-06-24 12:41:02+02:00	2022-06-24	2022-06-24 10:41:02 UTC	Berlin	64	open	false			2022-07-05 05:52:14 UTC	2022-07-05 05:55:20 UTC	research	CC-BY-NC
Natrix natrix	2022-07-03 16:18:23 +0200	55.7437	10.8702	grass snake	https://www.inaturalist.org/observations/124846552	2022-07-03 16:18:23+02:00	2022-07-03	2022-07-03 14:18:23 UTC	Copenhagen	3	open	false			2022-07-05 05:43:58 UTC	2022-07-06 06:29:35 UTC	research	CC-BY-NC
Natrix natrix	2022-07-03 16:44:58 +0300	60.271	25.1585	grass snake	https://www.inaturalist.org/observations/124840025	2022-07-03 16:44:58	2022-07-03	2022-07-03 13:44:58 UTC	Helsinki	457	open	false	gps	gps	2022-07-05 04:05:57 UTC	2022-07-06 06:29:50 UTC	research
Natrix natrix	2022-07-04 13:34:00 +0300	55.5793	37.5608	grass snake	https://www.inaturalist.org/observations/124760418	2022/07/04 13:34	2022-07-04	2022-07-04 10:34:00 UTC	St. Petersburg	8	open	false			2022-07-04 18:12:06 UTC	2022-07-27 16:52:20 UTC	research	CC-BY-NC
Natrix natrix	2022-07-03 17:07:20 +0300	49.5488	25.5773	grass snake	https://www.inaturalist.org/observations/124755514	2022-07-03 17:07:20	2022-07-03	2022-07-03 14:07:20 UTC	Kyiv	98	open	false	gps	gps	2022-07-04 17:43:32 UTC	2022-07-05 05:21:03 UTC	research
Natrix natrix	2022-07-04 15:21:00 +0300	54.8458	37.4211	grass snake	https://www.inaturalist.org/observations/124744145	2022/07/04 15:21	2022-07-04	2022-07-04 12:21:00 UTC	St. Petersburg	8	open	false			2022-07-04 16:30:51 UTC	2022-07-05 05:21:06 UTC	research	CC-BY-NC
Natrix natrix	2022-07-04 16:10:05 +0300	57.2012	37.6926	grass snake	https://www.inaturalist.org/observations/124734498	2022-07-04 16:10:05+03:00	2022-07-04	2022-07-04 13:10:05 UTC	St. Petersburg	5	open	false			2022-07-04 15:28:57 UTC	2022-09-29 20:38:06 UTC	research	CC-BY-NC
Natrix natrix	2022-06-13 14:15:16 +0200	49.0557	13.7913	grass snake	https://www.inaturalist.org/observations/124701501	2022-06-13 14:15:16	2022-06-13	2022-06-13 12:15:16 UTC	Prague	#N/A	open	false			2022-07-04 09:54:52 UTC	2022-07-24 12:17:32 UTC	research
Natrix natrix	2022-07-04 10:16:00 +0300	60.1484	24.3915	grass snake	https://www.inaturalist.org/observations/124692015	Mon Jul 04 2022 10:16:00 GMT +0300 (GMT+3)	2022-07-04	2022-07-04 07:16:00 UTC	Helsinki	15	open	false			2022-07-04 07:16:29 UTC	2022-07-04 08:10:39 UTC	research	CC-BY-NC
Natrix natrix	2022-07-03 11:59:00 +0200	52.6839	10.1086	grass snake	https://www.inaturalist.org/observations/124685986	2022/07/03 11:59 AM	2022-07-03	2022-07-03 09:59:00 UTC	Berlin	#N/A	open	false			2022-07-04 05:40:17 UTC	2022-07-04 05:42:08 UTC	research	CC-BY-NC
Natrix natrix	2022-07-02 15:39:24 +0300	60.3404	22.0039	grass snake	https://www.inaturalist.org/observations/124613311	2022-07-02 15:39:24	2022-07-02	2022-07-02 12:39:24 UTC	Helsinki	16	open	false	gps	gps	2022-07-03 19:56:03 UTC	2022-07-04 07:04:39 UTC	research	CC-BY-NC
Natrix natrix	2022-07-03 00:00:00 +0100	47.703	14.4618	grass snake	https://www.inaturalist.org/observations/124596380	2022-07-03	2022-07-03		Vienna	33	open	false	gps	gps	2022-07-03 18:18:31 UTC	2022-07-16 20:06:59 UTC	research
Natrix natrix	2022-06-16 16:38:24 +0200	55.2925	10.1117	grass snake	https://www.inaturalist.org/observations/124586557	2022-06-16 16:38:24	2022-06-16	2022-06-16 14:38:24 UTC	Copenhagen	599	open	false	gps	gps	2022-07-03 17:18:02 UTC	2022-07-04 05:14:19 UTC	research	CC-BY-NC
Natrix natrix	2022-07-02 14:01:00 +0300	50.4387	40.0979	grass snake	https://www.inaturalist.org/observations/124580198	2022/07/02 14:01	2022-07-02	2022-07-02 11:01:00 UTC	St. Petersburg	8	open	false			2022-07-03 16:38:56 UTC	2022-07-04 05:14:22 UTC	research	CC-BY-NC
Natrix natrix	2022-07-03 16:31:00 +0200	51.0989	12.6114	grass snake	https://www.inaturalist.org/observations/124579265	2022-07-03 16:31:00+02:00	2022-07-03	2022-07-03 14:31:00 UTC	Berlin	393	open	false			2022-07-03 16:32:06 UTC	2022-07-04 05:14:25 UTC	research	CC-BY-NC
Natrix natrix	2022-06-29 20:20:00 +0200	51.8195	15.234	grass snake	https://www.inaturalist.org/observations/124578252	2022/06/29 20:20	2022-06-29	2022-06-29 18:20:00 UTC	Warsaw	8	open	false			2022-07-03 16:26:04 UTC	2022-12-27 19:52:23 UTC	research	CC-BY-NC
Natrix natrix	2022-06-14 10:23:45 +0300	61.1304	29.9588	grass snake	https://www.inaturalist.org/observations/124577099	2022-06-14 10:23:45	2022-06-14	2022-06-14 07:23:45 UTC	St. Petersburg	26	open	false	gps	gps	2022-07-03 16:18:19 UTC	2022-07-03 16:45:34 UTC	research	CC-BY-NC
Natrix natrix	2022-07-02 13:32:52 +0200	48.2865	11.6545	grass snake	https://www.inaturalist.org/observations/124566705	2022-07-02 13:32:52	2022-07-02	2022-07-02 11:32:52 UTC	Berlin	#N/A	open	false	gps	gps	2022-07-03 15:16:09 UTC	2022-09-24 11:05:51 UTC	needs_id
Natrix natrix	2022-04-26 19:48:12 +0200	45.5265	15.594	grass snake	https://www.inaturalist.org/observations/124550123	2022-04-26 19:48:12	2022-04-26	2022-04-26 17:48:12 UTC	Zagreb	8	open	false	gps	gps	2022-07-03 13:30:36 UTC	2023-02-11 20:33:13 UTC	research	CC-BY-NC
Natrix natrix	2022-06-24 12:52:00 +0200	50.5756	9.33145	grass snake	https://www.inaturalist.org/observations/124544995	2022-06-24 12:52:00	2022-06-24	2022-06-24 10:52:00 UTC	Berlin	26	open	false	gps	gps	2022-07-03 12:53:52 UTC	2022-07-03 13:32:35 UTC	research	CC-BY-NC
Natrix natrix	2012-04-30 18:11:00 +0200	52.3332	14.5649	grass snake	https://www.inaturalist.org/observations/124540139	2012/04/30 18:11	2012-04-30	2012-04-30 16:11:00 UTC	Warsaw	61	open	false			2022-07-03 12:15:52 UTC	2022-12-27 19:52:13 UTC	research	CC-BY-NC
Natrix natrix	2022-05-07 18:07:00 +0300	54.6718	40.7864	grass snake	https://www.inaturalist.org/observations/124530662	2022/05/07 18:07 MSK	2022-05-07	2022-05-07 15:07:00 UTC	St. Petersburg	300	open	false			2022-07-03 10:46:00 UTC	2022-07-03 11:03:23 UTC	research	CC-BY-NC
Natrix natrix	2022-07-03 11:32:00 +0200	47.7638	13.0652	grass snake	https://www.inaturalist.org/observations/124523956	2022-07-03 11:32:00	2022-07-03	2022-07-03 09:32:00 UTC	Vienna	11	open	false			2022-07-03 09:32:11 UTC	2022-08-16 20:29:11 UTC	research	CC-BY-NC
Natrix natrix	2022-06-30 00:00:00 +0100	59.6053	12.7904	grass snake	https://www.inaturalist.org/observations/124517418	2022-06-30	2022-06-30		Stockholm	530	open	false	gps	gps	2022-07-03 08:07:16 UTC	2022-07-03 09:31:25 UTC	research
Natrix natrix	2022-07-02 19:33:56 +0200	54.7609	20.3489	grass snake	https://www.inaturalist.org/observations/124509058	2022-07-02 19:33:56	2022-07-02	2022-07-02 17:33:56 UTC	Kaliningrad	#N/A	open	false	gps	gps	2022-07-03 05:46:46 UTC	2023-01-28 10:47:11 UTC	research	CC-BY-NC
Natrix natrix	2022-07-02 20:30:18 +0300	55.0693	40.2295	grass snake	https://www.inaturalist.org/observations/124506815	2022-07-02 20:30:18	2022-07-02	2022-07-02 17:30:18 UTC	St. Petersburg	#N/A	open	false	gps	gps	2022-07-03 05:15:01 UTC	2022-07-03 05:37:19 UTC	research	CC-BY-NC
Natrix natrix	2022-06-30 13:58:00 +0200	43.3651	18.3703	grass snake	https://www.inaturalist.org/observations/124459443	2022/06/30 13:58	2022-06-30	2022-06-30 11:58:00 UTC	Sarajevo	4	open	false			2022-07-02 22:00:49 UTC	2022-10-15 20:38:09 UTC	research	CC-BY-NC
Natrix natrix	2022-06-12 13:41:00 +0300	60.4064	22.1096	grass snake	https://www.inaturalist.org/observations/124443360	2022/06/12 1:41 PM	2022-06-12	2022-06-12 10:41:00 UTC	Helsinki	5	open	false			2022-07-02 20:12:24 UTC	2022-07-02 20:22:59 UTC	research
Natrix natrix	2022-06-29 18:05:09 +0200	47.0966	15.8755	grass snake	https://www.inaturalist.org/observations/124440893	2022-06-29 18:05:09	2022-06-29	2022-06-29 16:05:09 UTC	Vienna	514	open	false	gps	gps	2022-07-02 19:57:03 UTC	2022-07-09 07:10:59 UTC	research	CC-BY-NC
Natrix natrix	2022-06-30 16:27:57 +0200	53.2186	12.9123	grass snake	https://www.inaturalist.org/observations/124417873	2022-06-30 16:27:57+02:00	2022-06-30	2022-06-30 14:27:57 UTC	Berlin	10	open	false			2022-07-02 17:26:53 UTC	2022-07-02 18:08:29 UTC	research	CC-BY-NC
Natrix natrix	2022-07-02 15:59:08 +0300	55.0682	40.2307	grass snake	https://www.inaturalist.org/observations/124406306	2022-07-02 15:59:08	2022-07-02	2022-07-02 12:59:08 UTC	St. Petersburg	#N/A	open	false	gps	gps	2022-07-02 16:15:12 UTC	2022-07-02 18:06:01 UTC	research	CC-BY-NC
Natrix natrix	2022-07-02 10:25:02 +0300	49.9549	31.1531	grass snake	https://www.inaturalist.org/observations/124403463	2022-07-02 10:25:02	2022-07-02	2022-07-02 07:25:02 UTC	Kyiv	#N/A	open	false	gps	gps	2022-07-02 15:58:21 UTC	2022-07-03 05:27:21 UTC	research	CC-BY-NC
Natrix natrix	2022-06-11 23:11:00 +0200	46.0472	14.3293	grass snake	https://www.inaturalist.org/observations/124399974	2022/06/11 11:11 PM	2022-06-11	2022-06-11 21:11:00 UTC	Ljubljana	#N/A	open	false			2022-07-02 15:39:59 UTC	2022-07-15 14:29:09 UTC	research	CC-BY
Natrix natrix	2022-06-26 15:57:00 +0200	53.2055	8.82007	grass snake	https://www.inaturalist.org/observations/124390497	2022/06/26 3:57 PM	2022-06-26	2022-06-26 13:57:00 UTC	Berlin	10	open	false			2022-07-02 14:36:55 UTC	2022-09-20 15:26:48 UTC	research	CC-BY-NC-ND
Natrix natrix	2022-06-24 18:21:00 +0300	55.5348	38.8564	grass snake	https://www.inaturalist.org/observations/124388240	2022/06/24 18:21	2022-06-24	2022-06-24 15:21:00 UTC	St. Petersburg	19	open	false			2022-07-02 14:20:21 UTC	2022-07-02 18:17:43 UTC	research	CC-BY-NC
Natrix natrix	2022-06-24 18:11:00 +0300	55.5363	38.8538	grass snake	https://www.inaturalist.org/observations/124388097	2022/06/24 18:11	2022-06-24	2022-06-24 15:11:00 UTC	St. Petersburg	23	open	false			2022-07-02 14:19:15 UTC	2022-07-02 18:17:56 UTC	research	CC-BY-NC
Natrix natrix	2022-07-02 10:20:39 +0300	49.9548	31.1531	grass snake	https://www.inaturalist.org/observations/124378881	2022-07-02 10:20:39+03:00	2022-07-02	2022-07-02 07:20:39 UTC	Kyiv	8	open	false			2022-07-02 13:06:10 UTC	2022-07-02 15:11:59 UTC	research	CC-BY-NC
Natrix natrix	2022-07-02 14:52:00 +0200	49.939	14.7179	grass snake	https://www.inaturalist.org/observations/124377410	2022-07-02 14:52:00+02:00	2022-07-02	2022-07-02 12:52:00 UTC	Prague	7	open	false			2022-07-02 12:52:33 UTC	2022-07-03 09:26:51 UTC	research
Natrix natrix	2022-07-02 13:07:54 +0300	59.9891	23.8365	grass snake	https://www.inaturalist.org/observations/124367584	Sat Jul 02 2022 13:07:54 GMT+0300 (GMT+3)	2022-07-02	2022-07-02 10:07:54 UTC	Helsinki	16	open	false			2022-07-02 10:54:32 UTC	2022-07-02 15:13:05 UTC	research
Natrix natrix	2022-07-02 09:51:55 +0200	55.8263	12.5629	grass snake	https://www.inaturalist.org/observations/124356154	2022-07-02 09:51:55+02:00	2022-07-02	2022-07-02 07:51:55 UTC	Copenhagen	4	open	false			2022-07-02 07:51:58 UTC	2022-07-02 15:16:35 UTC	research
Natrix natrix	2022-07-02 09:31:00 +0300	57.812	24.346	grass snake	https://www.inaturalist.org/observations/124351972	2022/07/02 9:31 AM	2022-07-02	2022-07-02 06:31:00 UTC	Riga	4	open	false			2022-07-02 06:33:11 UTC	2022-07-04 21:04:36 UTC	research	CC-BY-NC
Natrix natrix	2022-05-26 19:44:00 +0300	38.1466	21.3845	grass snake	https://www.inaturalist.org/observations/124305134	2022/05/26 7:44 PM	2022-05-26	2022-05-26 16:44:00 UTC	Athens	488	open	false			2022-07-01 21:59:16 UTC	2022-07-22 20:50:06 UTC	research
Natrix natrix	2022-07-01 16:42:38 +0200	48.2829	11.6399	grass snake	https://www.inaturalist.org/observations/124304183	2022-07-01 16:42:38	2022-07-01	2022-07-01 14:42:38 UTC	Berlin	#N/A	open	false	gps	gps	2022-07-01 21:49:57 UTC	2022-07-01 21:50:20 UTC	needs_id
Natrix natrix	2022-06-26 17:49:50 +0300	53.6249	27.9352	grass snake	https://www.inaturalist.org/observations/124302009	2022-06-26 17:49:50	2022-06-26	2022-06-26 14:49:50 UTC	Minsk	#N/A	open	false	gps	gps	2022-07-01 21:31:42 UTC	2022-07-01 21:58:28 UTC	research	CC-BY-NC
Natrix natrix	2022-06-24 09:56:00 +0300	55.5342	38.8565	grass snake	https://www.inaturalist.org/observations/124296248	2022/06/24 09:56	2022-06-24	2022-06-24 06:56:00 UTC	St. Petersburg	10	open	false			2022-07-01 20:45:06 UTC	2022-07-01 21:58:44 UTC	research	CC-BY-NC
Natrix natrix	2022-06-30 22:15:00 +0300	54.9666	37.5768	grass snake	https://www.inaturalist.org/observations/124284411	2022/06/30 22:15	2022-06-30	2022-06-30 19:15:00 UTC	St. Petersburg	4	open	false			2022-07-01 19:17:15 UTC	2022-07-02 06:58:57 UTC	research	CC-BY-NC
Natrix natrix	2022-06-24 14:29:24 +0200	48.4435	11.7085	grass snake	https://www.inaturalist.org/observations/124280374	2022-06-24 14:29:24+02:00	2022-06-24	2022-06-24 12:29:24 UTC	Berlin	121	open	false			2022-07-01 18:45:49 UTC	2022-07-01 21:30:09 UTC	research	CC-BY-NC
Natrix natrix	2022-07-01 13:28:43 +0200	42.5934	19.6783	grass snake	https://www.inaturalist.org/observations/124262884	2022-07-01 13:28:43+02:00	2022-07-01	2022-07-01 11:28:43 UTC	Europe/Tirane	1240	open	false			2022-07-01 16:28:12 UTC	2022-07-02 15:16:36 UTC	research	CC-BY-NC
Natrix natrix	2022-07-01 18:23:38 +0200	57.6975	18.8001	grass snake	https://www.inaturalist.org/observations/124260428	Fri Jul 01 2022 18:23:38 GMT +0200 (GMT+2)	2022-07-01	2022-07-01 16:23:38 UTC	Stockholm	116	open	false			2022-07-01 16:09:40 UTC	2022-07-05 18:03:22 UTC	research	CC-BY-NC
Natrix natrix	2016-04-10 14:12:00 +0300	60.4228	22.1688	grass snake	https://www.inaturalist.org/observations/124259896	2016/04/10 2:12 PM	2016-04-10	2016-04-10 11:12:00 UTC	Helsinki	5	open	false			2022-07-01 16:06:33 UTC	2022-07-01 16:07:41 UTC	research
Natrix natrix	2022-06-24 14:26:19 +0200	48.4444	11.7092	grass snake	https://www.inaturalist.org/observations/124255602	2022-06-24 14:26:19+02:00	2022-06-24	2022-06-24 12:26:19 UTC	Berlin	64	open	false			2022-07-01 15:31:13 UTC	2022-07-01 15:47:53 UTC	research	CC-BY-NC
Natrix natrix	2022-06-24 10:32:00 +0300	56.2891	42.4161	grass snake	https://www.inaturalist.org/observations/124247432	2022/06/24 10:32	2022-06-24	2022-06-24 07:32:00 UTC	St. Petersburg	2	open	false			2022-07-01 14:25:50 UTC	2022-07-01 14:36:16 UTC	research	CC-BY-NC
Natrix natrix	2021-09-25 09:25:00 +0200	49.5851	20.6439	grass snake	https://www.inaturalist.org/observations/124240538	2021/09/25 09:25	2021-09-25	2021-09-25 07:25:00 UTC	Warsaw	2	open	false			2022-07-01 13:26:23 UTC	2022-07-01 13:27:07 UTC	research	CC-BY-NC
Natrix natrix	2021-09-26 09:24:00 +0200	49.5857	20.6431	grass snake	https://www.inaturalist.org/observations/124240417	2021/09/26 09:24	2021-09-26	2021-09-26 07:24:00 UTC	Warsaw	8	open	false			2022-07-01 13:25:05 UTC	2022-07-01 13:25:35 UTC	research	CC-BY-NC
Natrix natrix	2021-09-26 08:22:00 +0200	49.5857	20.6432	grass snake	https://www.inaturalist.org/observations/124240336	2021/09/26 08:22	2021-09-26	2021-09-26 06:22:00 UTC	Warsaw	15	open	false			2022-07-01 13:24:19 UTC	2022-07-01 13:24:50 UTC	research	CC-BY-NC
Natrix natrix	2021-09-26 10:19:00 +0200	49.5848	20.6307	grass snake	https://www.inaturalist.org/observations/124239995	2021/09/26 10:19	2021-09-26	2021-09-26 08:19:00 UTC	Warsaw	8	open	false			2022-07-01 13:21:00 UTC	2022-07-01 13:24:49 UTC	research	CC-BY-NC
Natrix natrix	2021-10-09 10:18:00 +0200	49.5856	20.6429	grass snake	https://www.inaturalist.org/observations/124239864	2021/10/09 10:18	2021-10-09	2021-10-09 08:18:00 UTC	Warsaw	8	open	false			2022-07-01 13:19:20 UTC	2022-07-01 13:24:43 UTC	research	CC-BY-NC
[truncated: 8,246 more rows]
